# Supplementary material for: The Influence of Genotype and Environment on Small RNA Profiles in Grapevine Berry
Source: PubMed Central journal article supplement (PMC5050227; doi:10.3389/fpls.2016.01459), 2016-10-05
Supplement: DataSheet1.pdf [file DataSheet1.pdf]

*Supplementary Material*

**The Influence of Genotype and Environment on small RNA Profiles in Grapevine  
Berry**

**Daniela Lopes Paim Pinto, Lucio Brancadoro, Silvia Dal Santo, Gabriella De Lorenzis, Mario Pezzotti, Blake C. Meyers, Mario Enrico Pè, Erica Mica \***

\* Correspondence: Erica Mica: [erica.mica@crea.gov.it](mailto:erica.mica@crea.gov.it)

## 1 Supplementary Figures

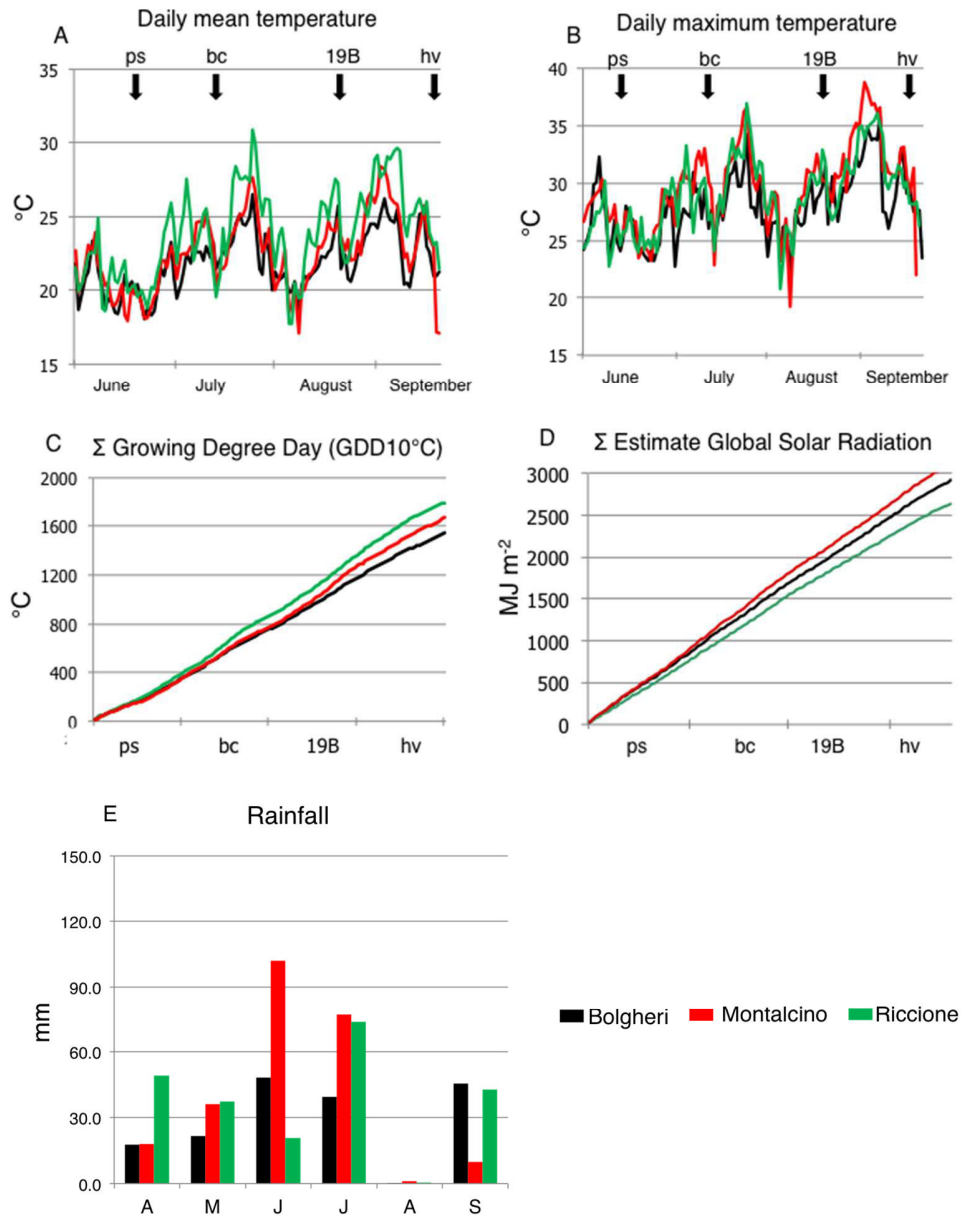

**Supplementary Figure 1. Details of the environmental conditions of vineyards. A:** The **Daily Mean Temperature** ( $T_d$ ) was generally higher in Riccione, followed by Montalcino. Bolgheri had the  $T_d$  slightly lower than Montalcino. The difference on the  $T_d$  among the vineyards was more pronounced towards the end of August and beginning of September.

**B:** The **Daily Maximum Temperature** ( $T_x$ ) of the 3 vineyards was in general similar during all the stages of the berries development. A very low value occurred during the month of August for all vineyards, however the lower peak was less pronounced in Bolgheri. Montalcino showed the higher

T<sub>x</sub> (39°C) at the beginning of September as well as Bolgheri (36°C), while Riccione had the highest T<sub>x</sub> (37°C) at the end of July.

**C:** The Growing Degree Day (GDD<sub>10°C</sub>) gradually increased from the ps towards the hv stage. During the ps stage the three vineyards showed the same rate of increase. From the transition between ps and the bc stage to the end of berry ripening (hv), Riccione had higher GDD<sub>10°C</sub>. Bolgheri and Montalcino showed almost the same GDD<sub>10°C</sub> until middle of 19B stage. From this point to the end of berry ripening (hv) Montalcino showed higher GDD<sub>10°C</sub> than Bolgheri, but still smaller than Riccione. At the end of the ripening process, Riccione reached 1721 GDD<sub>10°C</sub>, Montalcino 1564 GDD<sub>10°C</sub> and Bolgheri 1465 GDD<sub>10°C</sub>.

**D:** The **Estimate Global Solar Radiation** (R<sub>s</sub>) also had a linear increase in the three vineyards, from the ps towards the hv stage. Montalcino had the higher R<sub>s</sub> followed by Bolgheri and then Riccione. Bolgheri and Montalcino showed nearly the same rate during the ps stage. From bc to hv the difference between the two vineyards increased. On the other hand, Riccione had the lower R<sub>s</sub> during all the stages.

**E:** Bolgheri had the lower average **Rainfall** (28,7 mm) from April to September. During the period from May to July, Bolgheri had always the lower rainfall. Montalcino had the higher average rainfall (40,5 mm) followed by Riccione (37,2 mm). In Montalcino the month of June followed by July was responsible for the major part of the precipitation. The highest peak of rainfall in Montalcino was in June reaching 102.0 mm. In this same month, Bolgheri and Riccione showed much lower values, 48.1 and 20.6 mm respectively, which was also the most rainfall in Bolgheri. Riccione reached the most rainfall (73,6 mm) in July. August was the driest month in all vineyards, with no precipitation.

ps = pea size; bc = bunch closure; 19B = 19 °Brix; hv = harvest.

\*Brancadoro, L.; Zenoni, S. Analisi dell'interazione genotipo-ambiente in Sangiovese e Cabernet Sauvignon attraverso l'espressione globale dei geni. 2013. Unpublished data.



**Supplementary Figure 2: Small RNA size distributions from grapevine berries.** The X-axis indicates the size in nucleotides (nt) and the Y-axis indicates the “hits-normalized- abundance” (HNA) for each size class as an average of two biological replicates. Small RNA size profiles are grouped by vineyard as indicated, and the library codes are specified in Table 1.

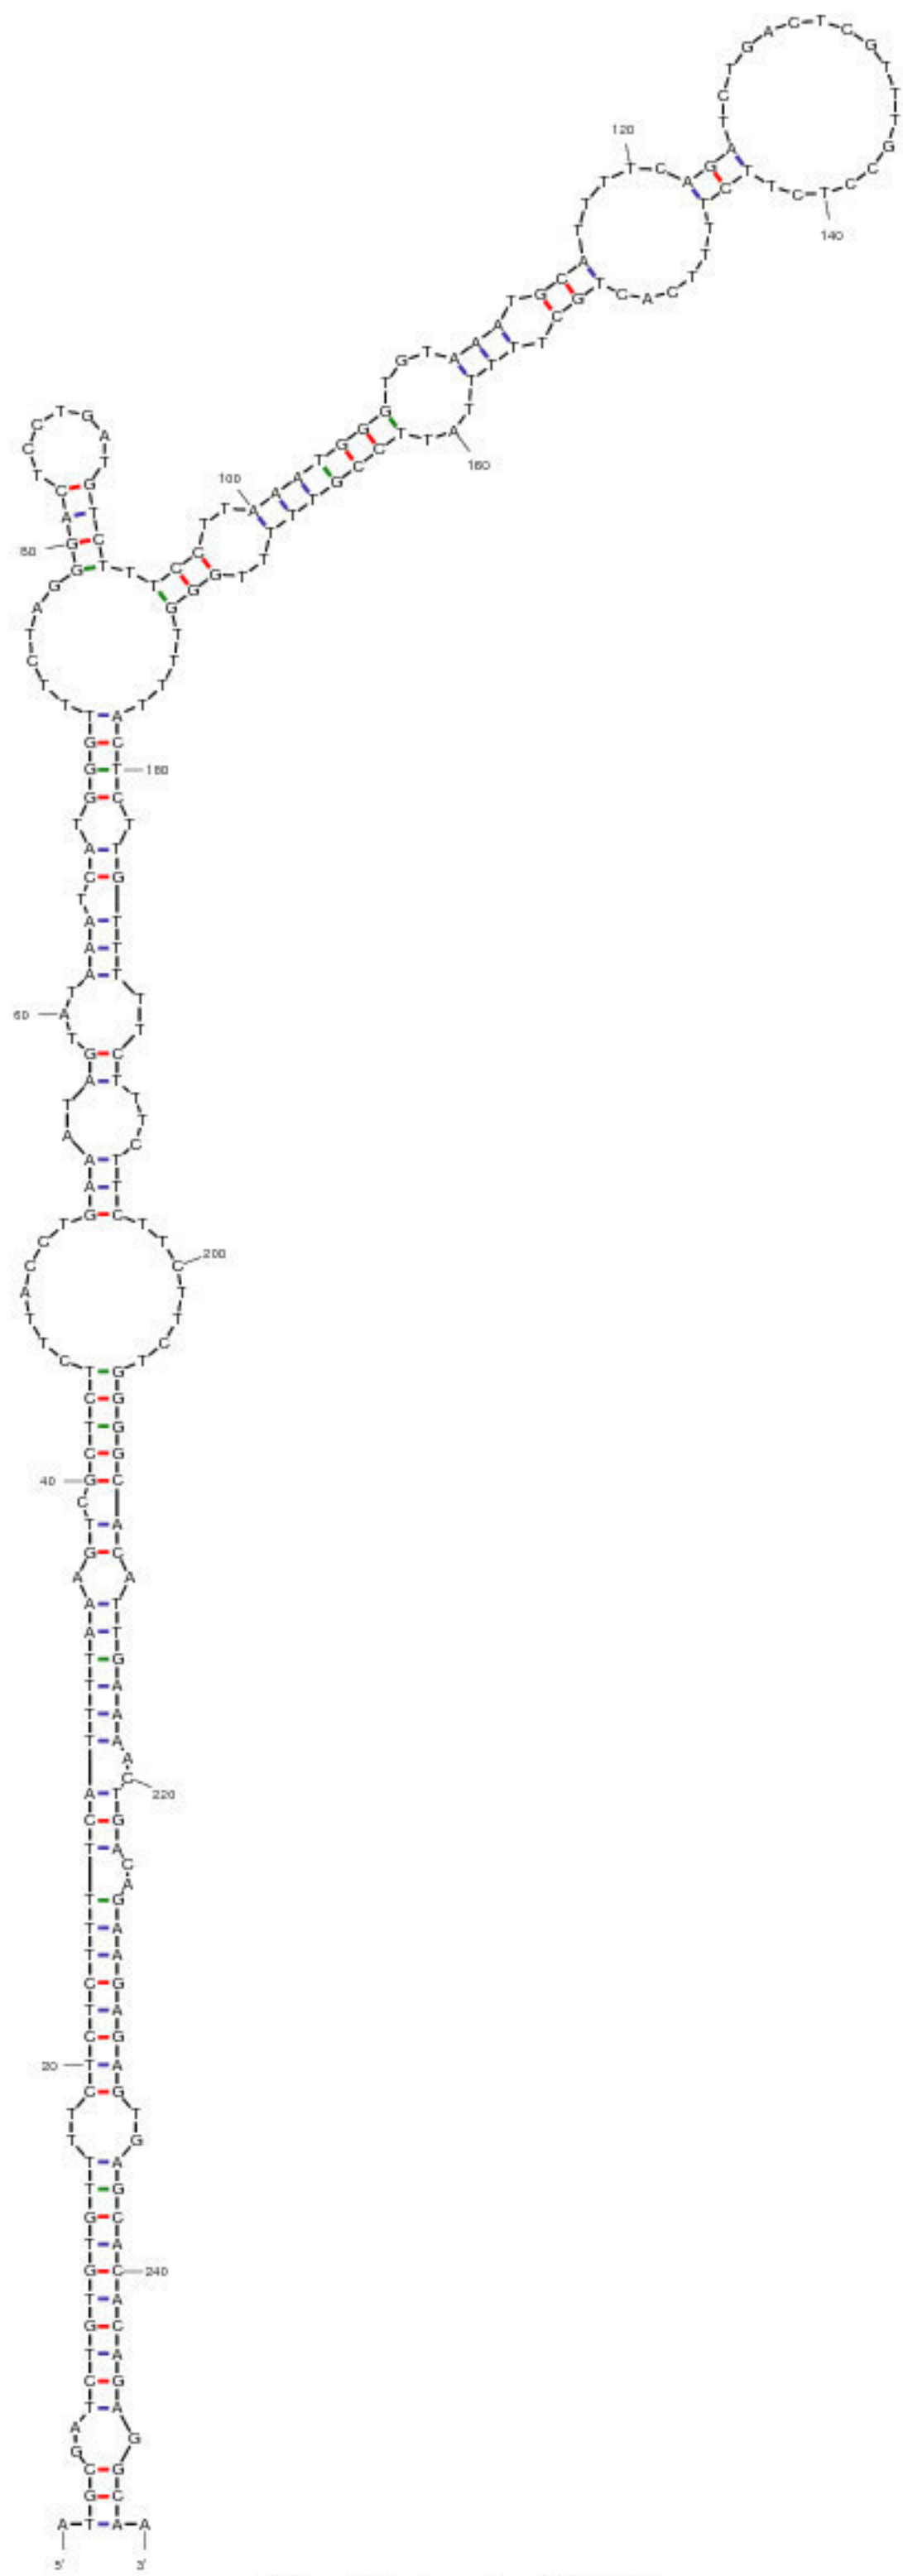

$dG = -61.5$  *vvi-miR156b*

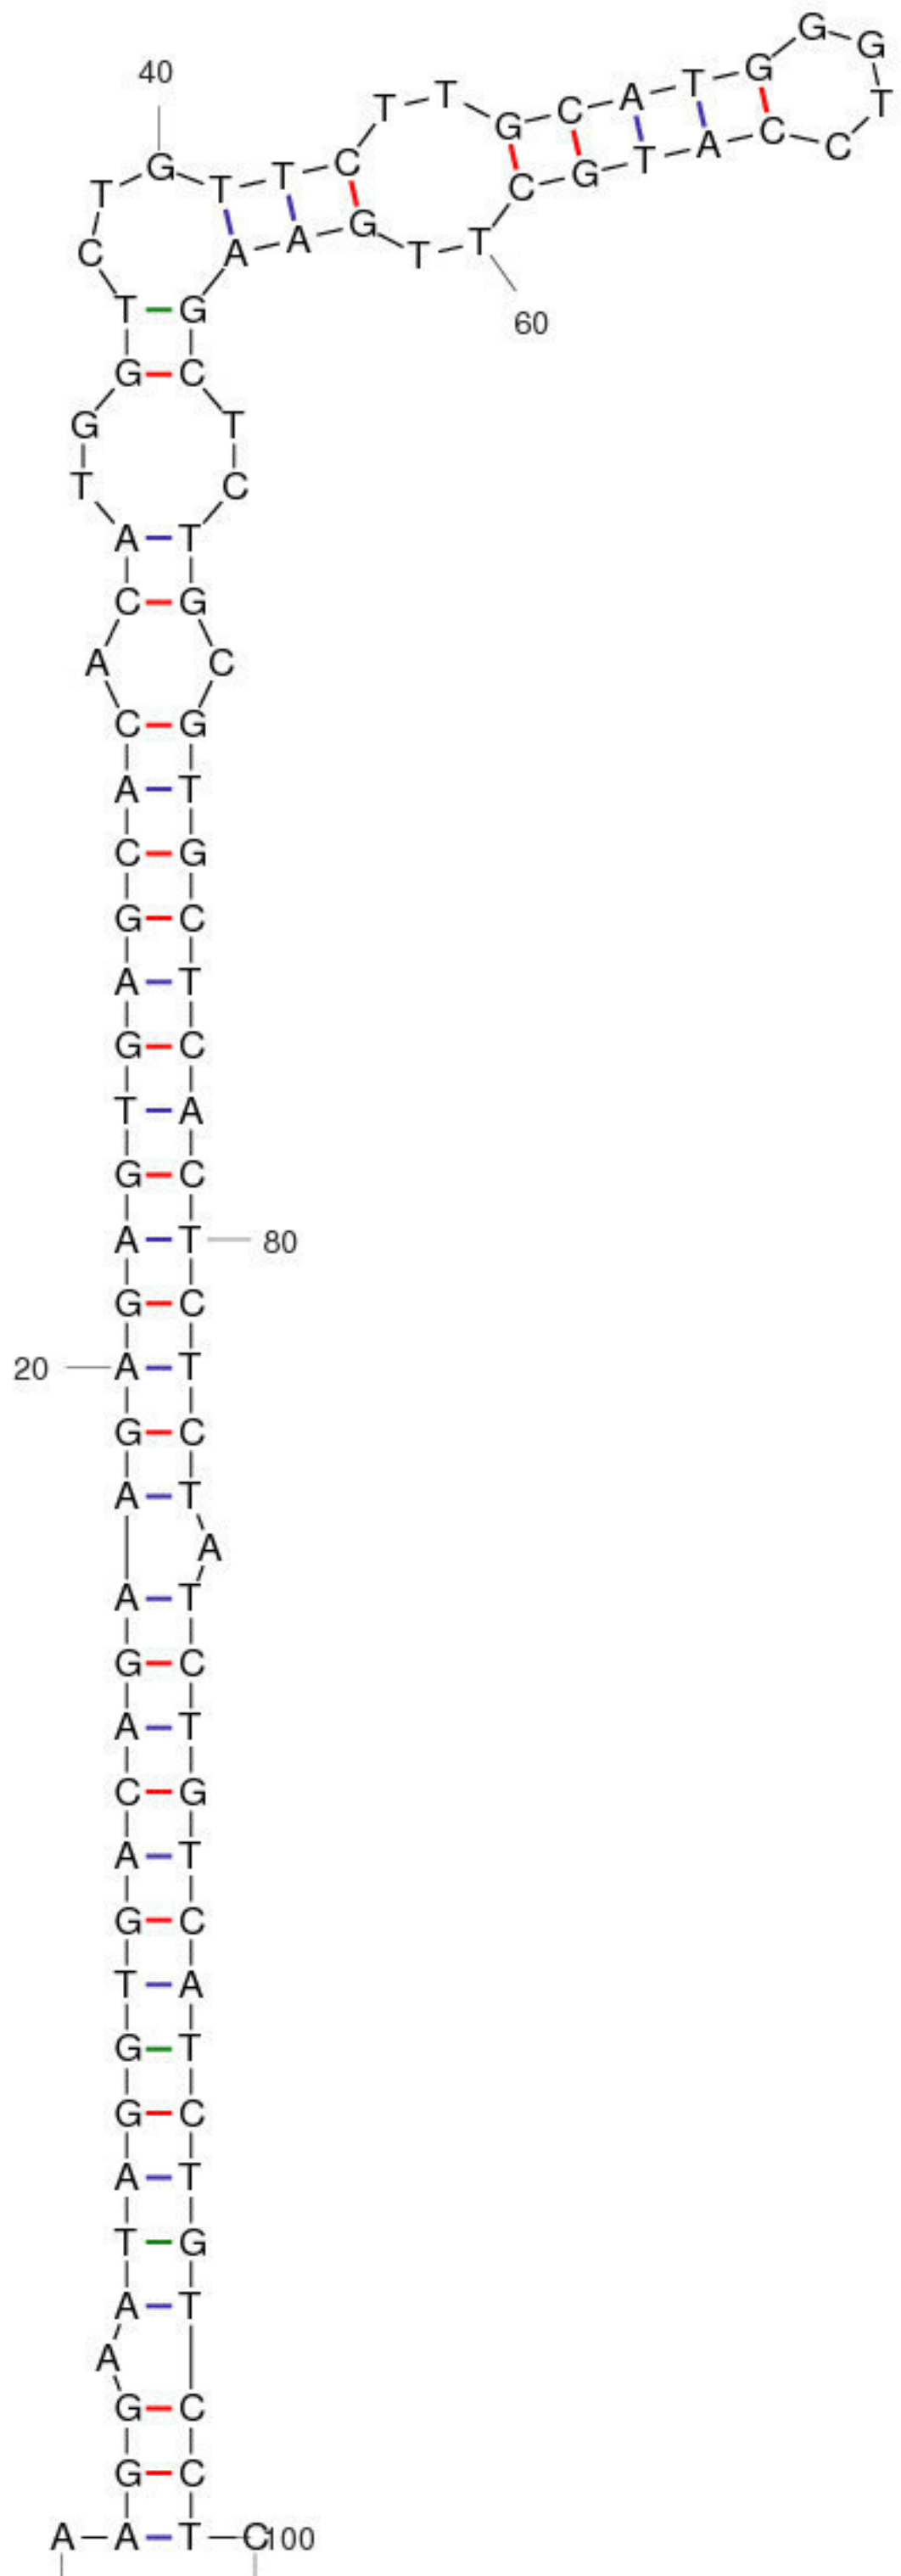

$dG = -60.1$  vvi-miR156c

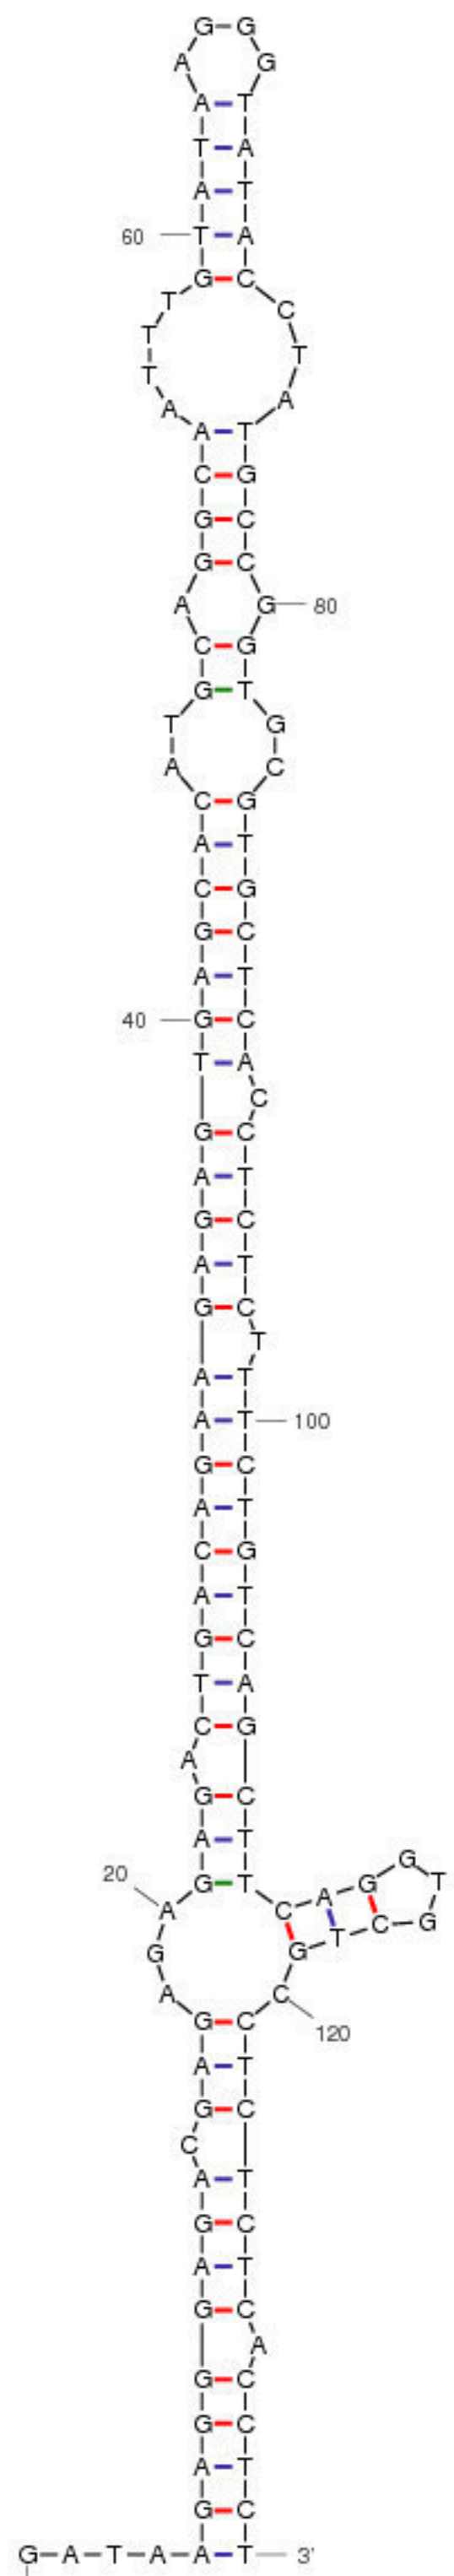

*dG = -60.7 vvi-miR156d*



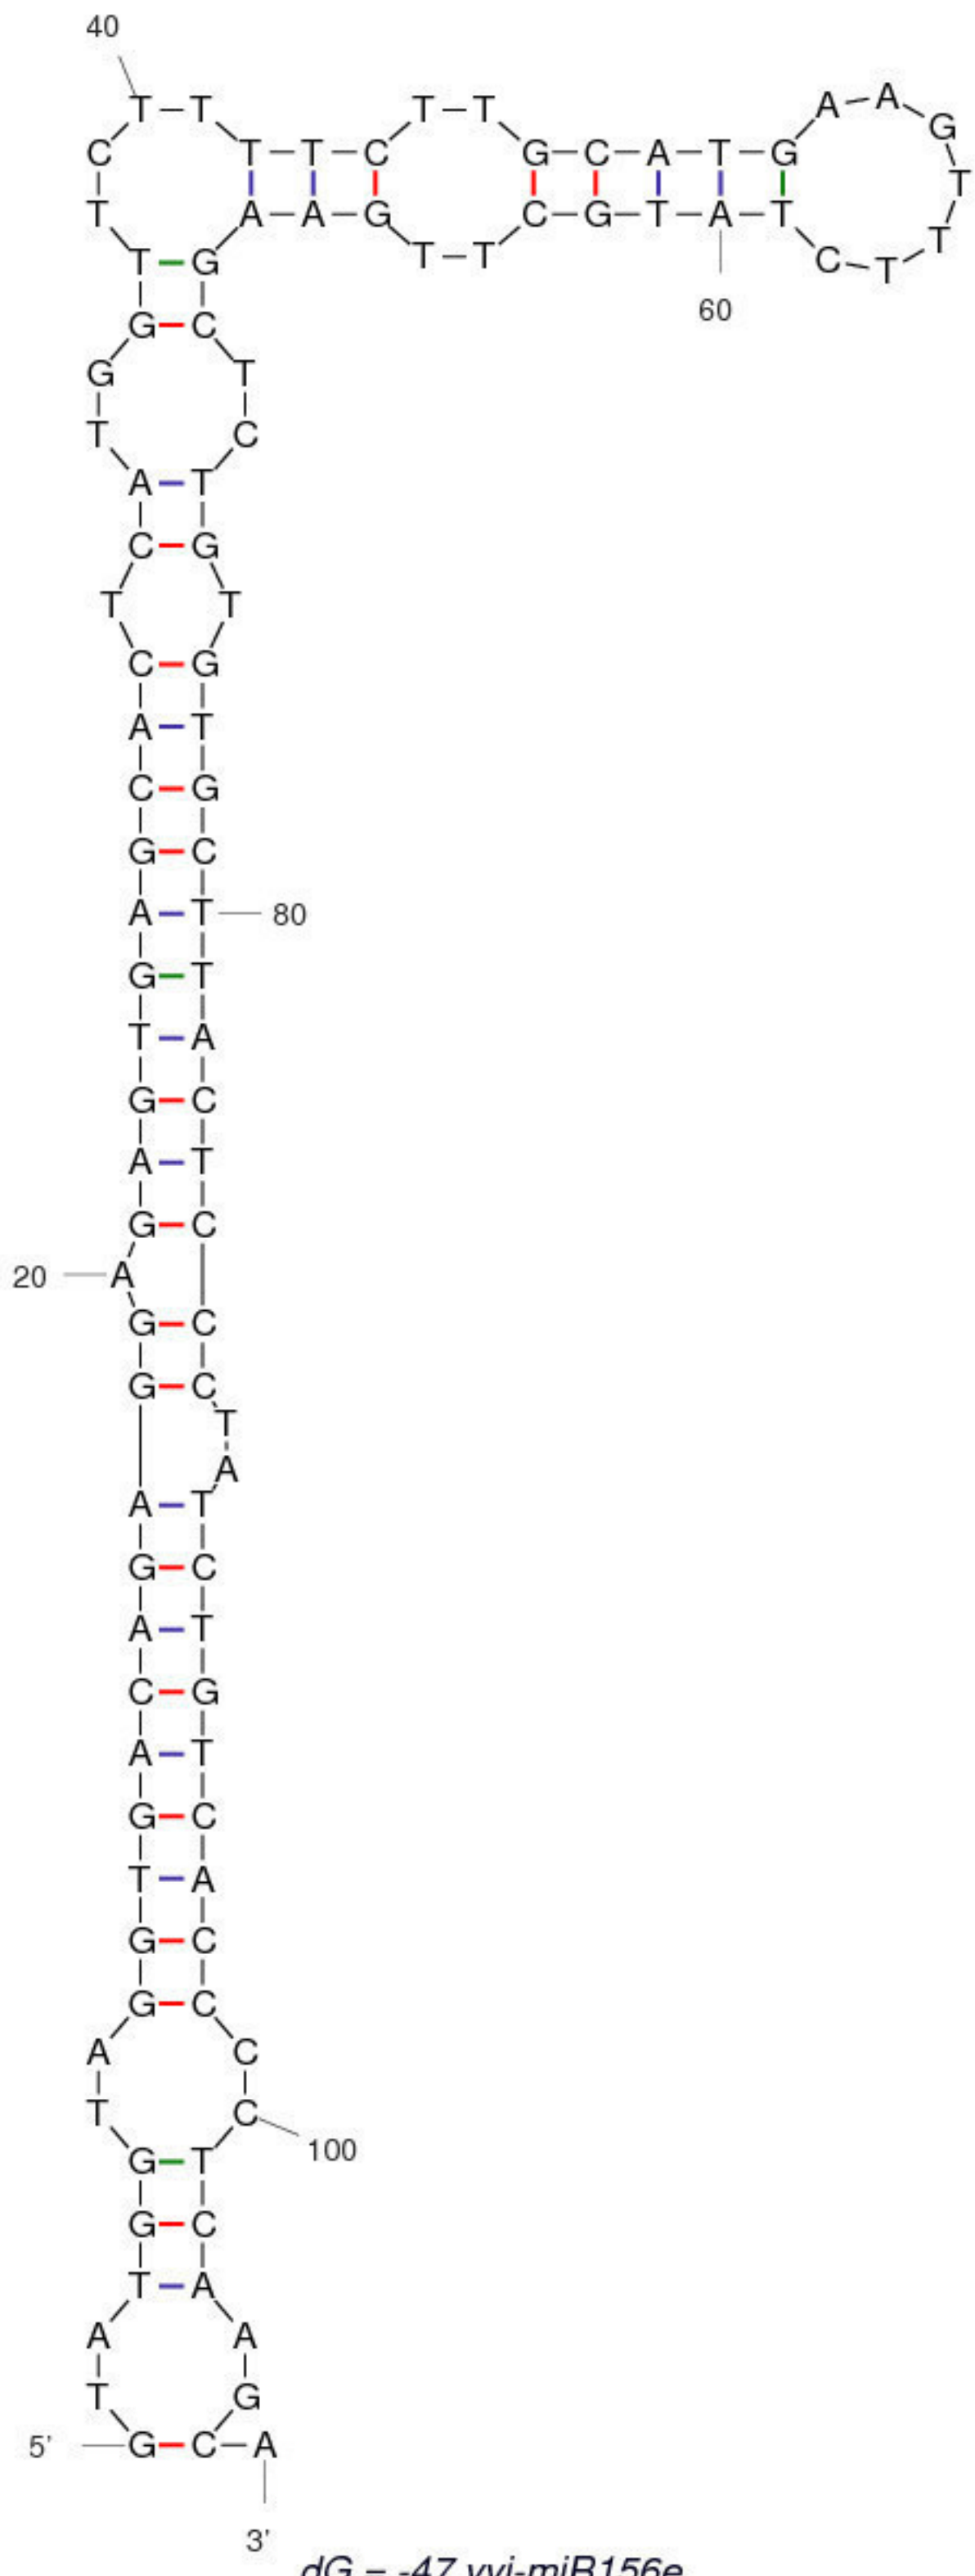

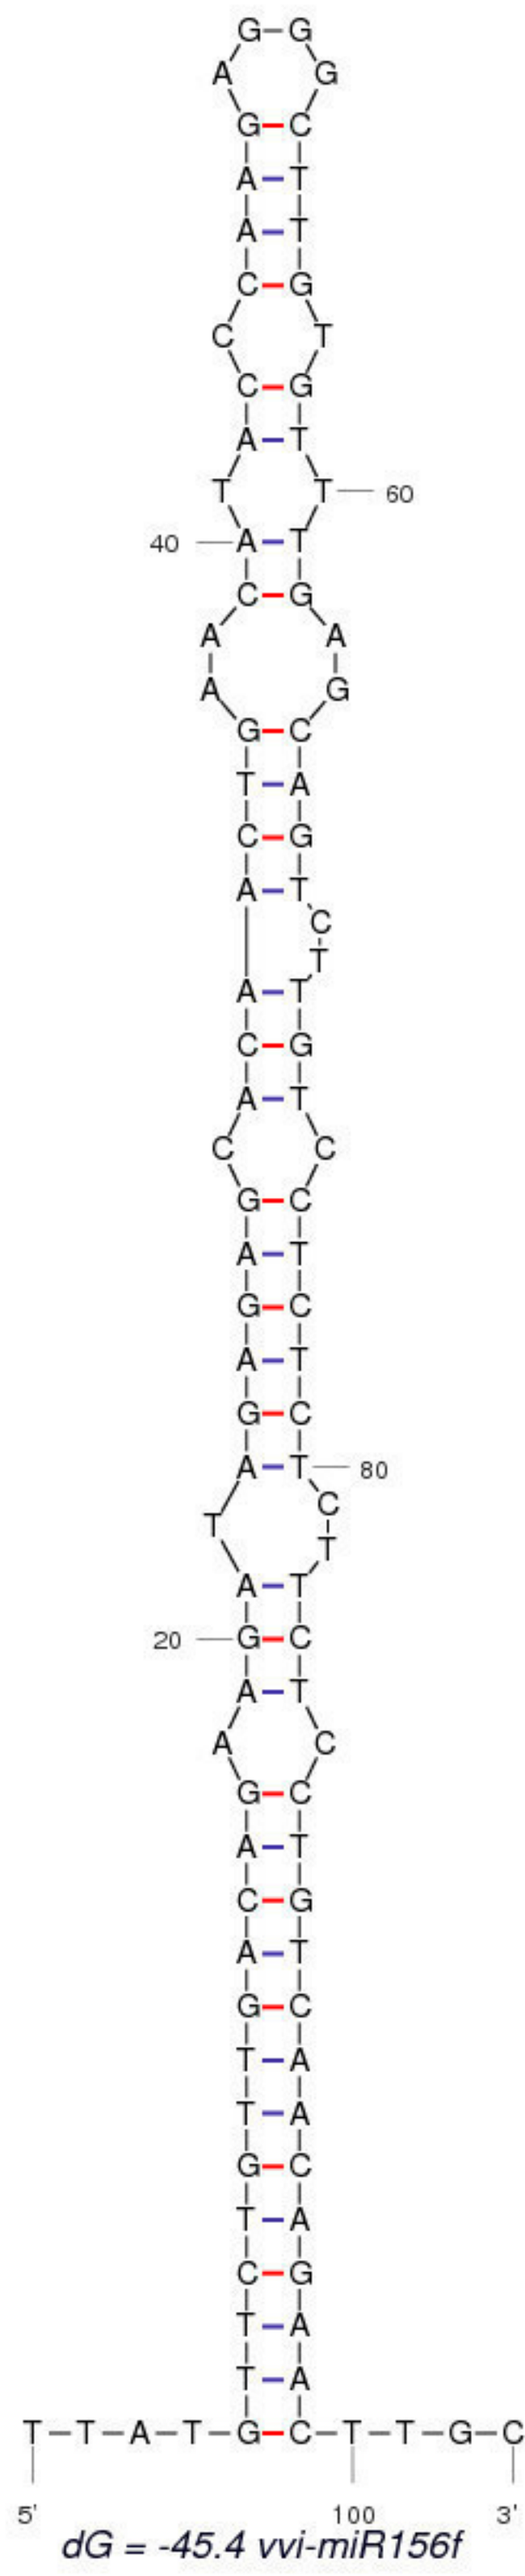

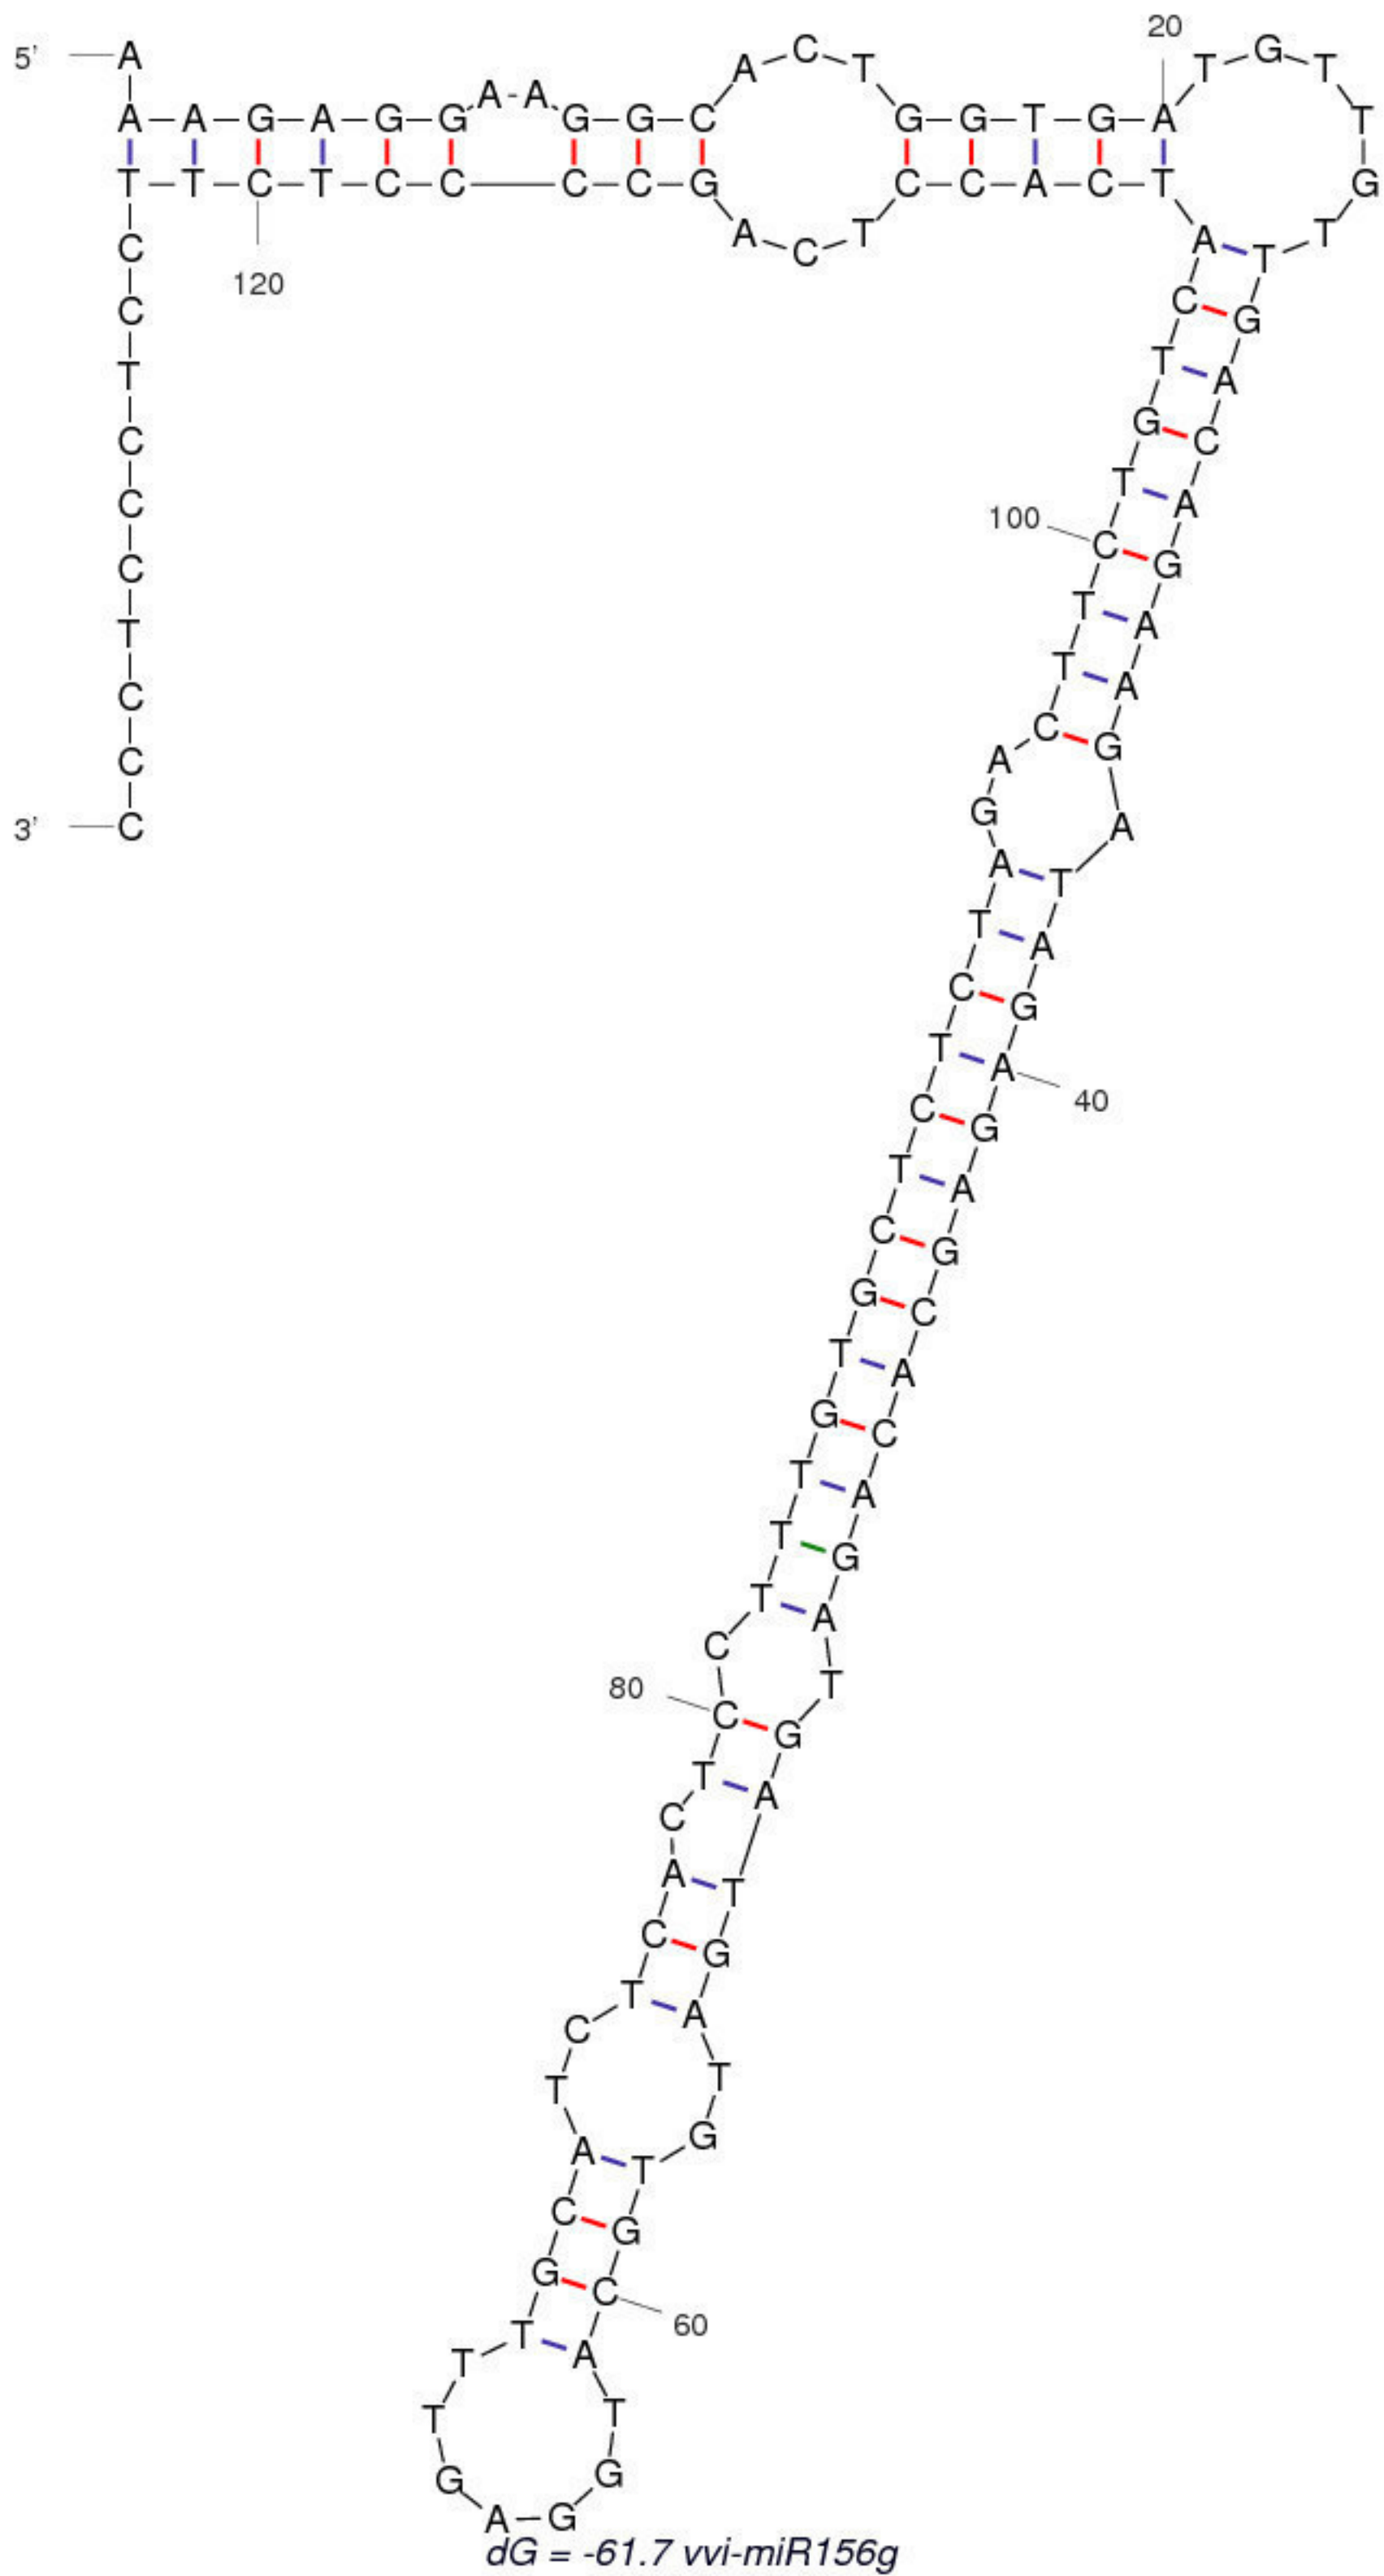

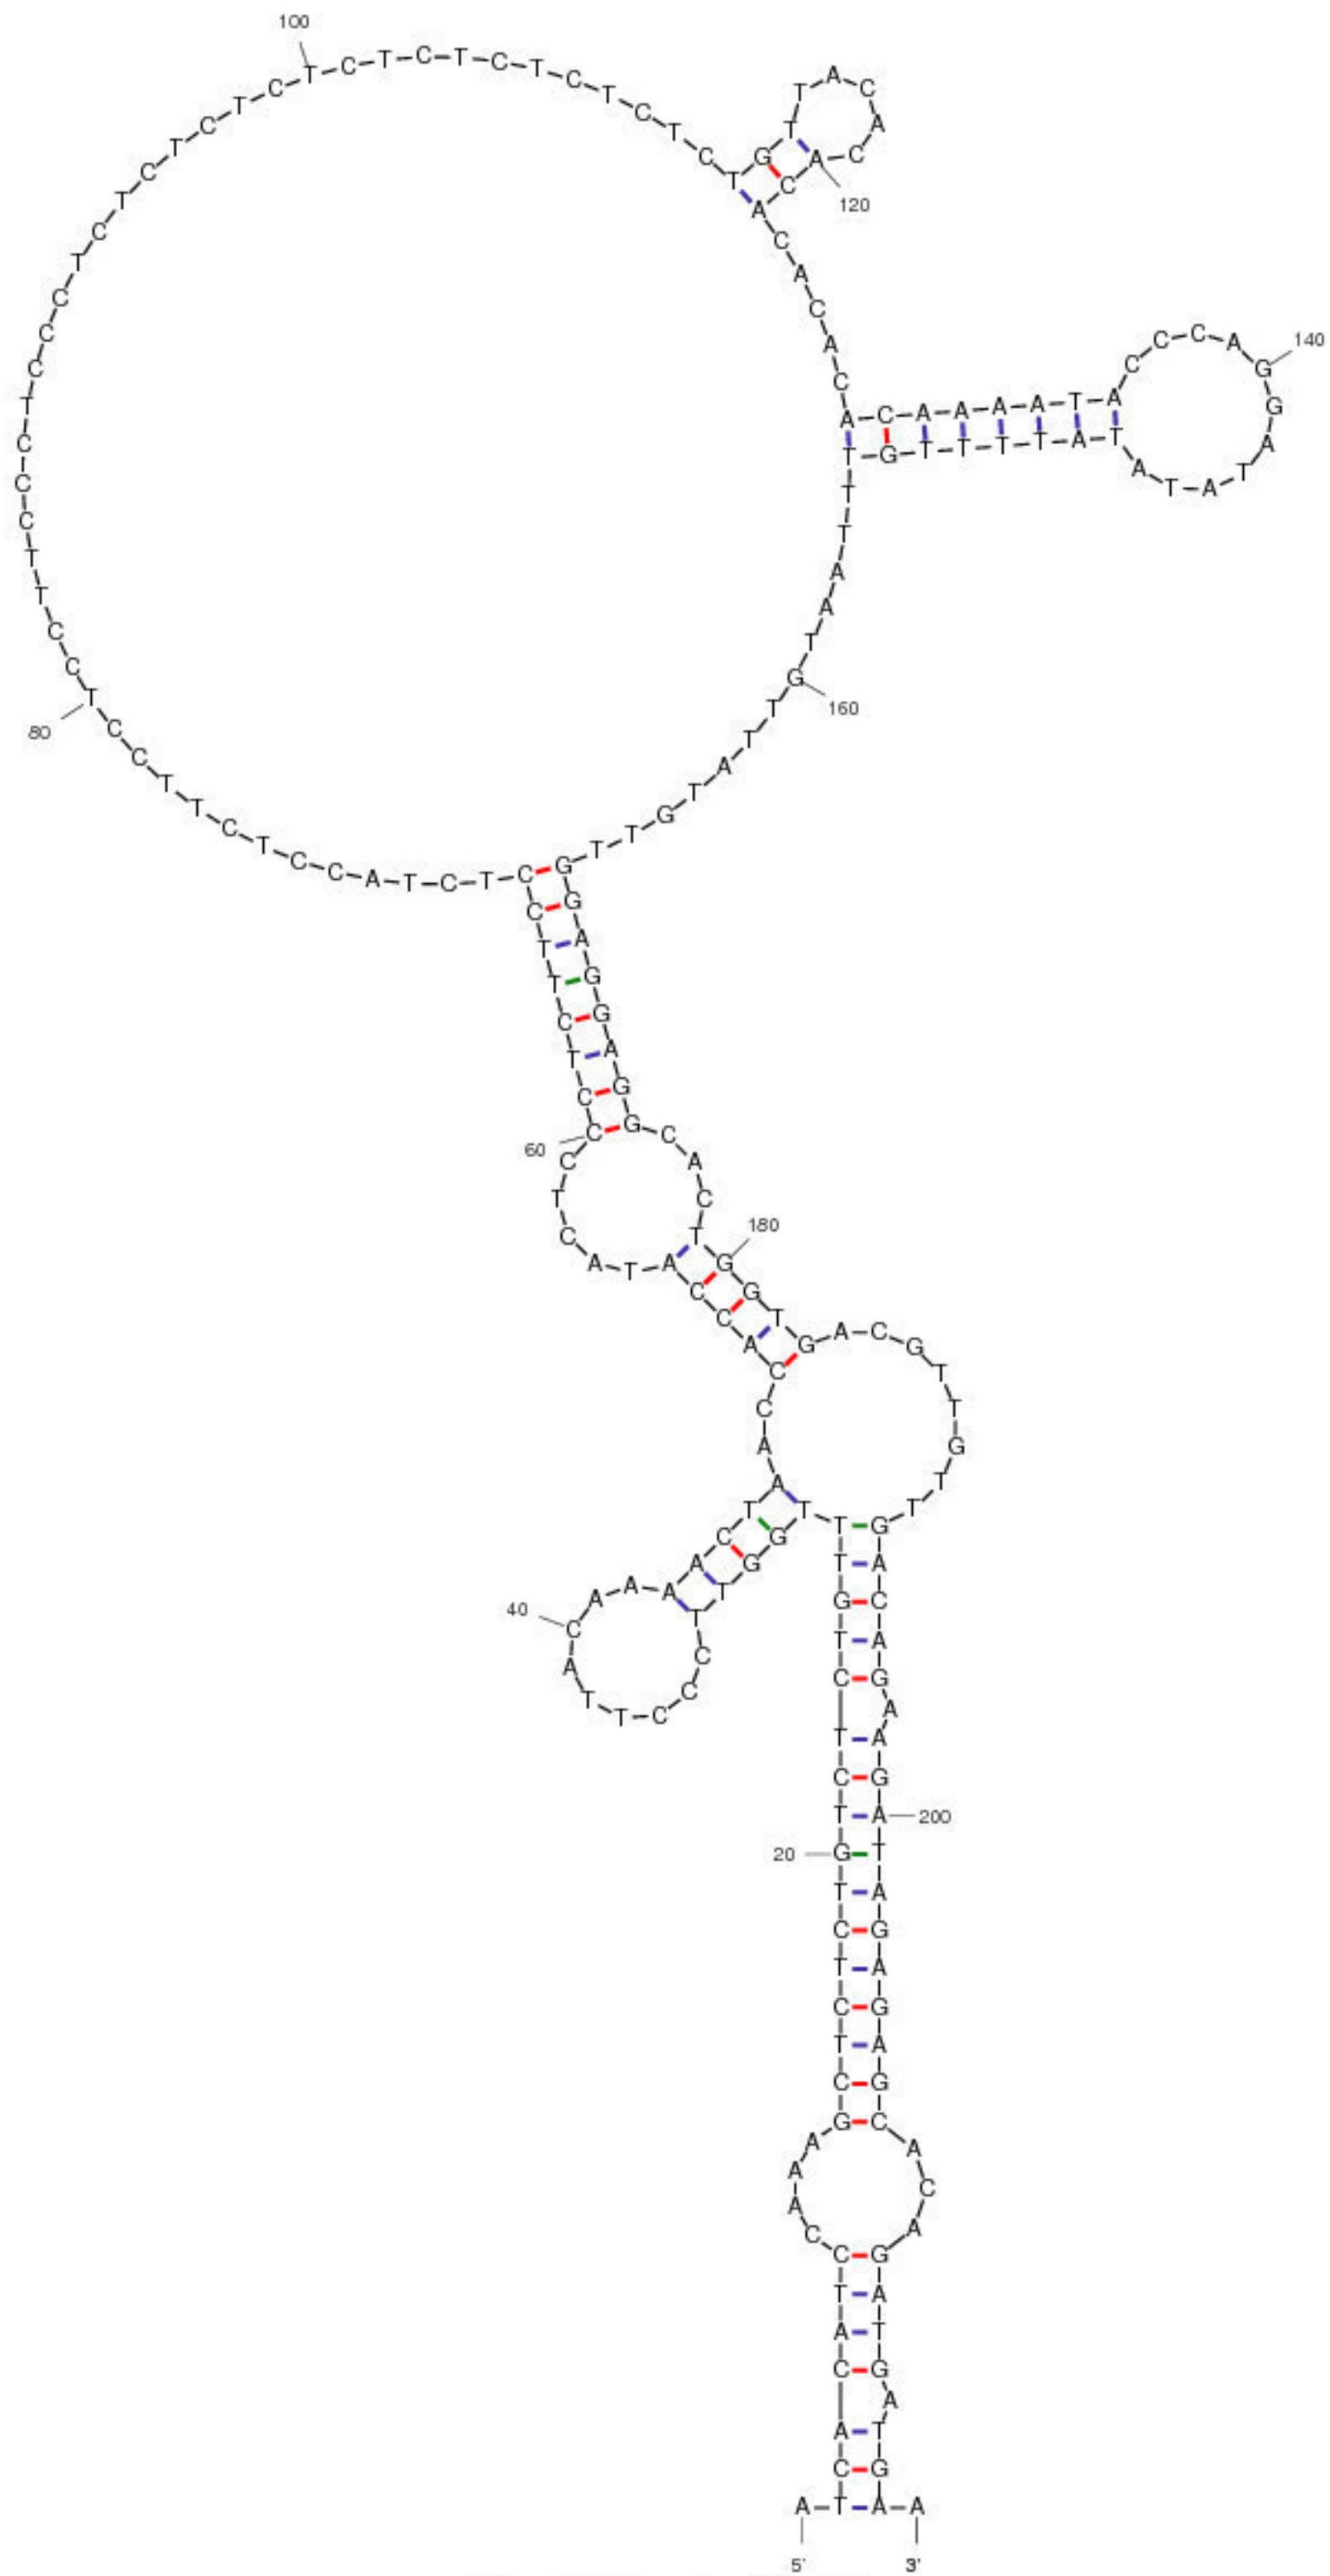

$dG = -51.2$  vvi-miR156i

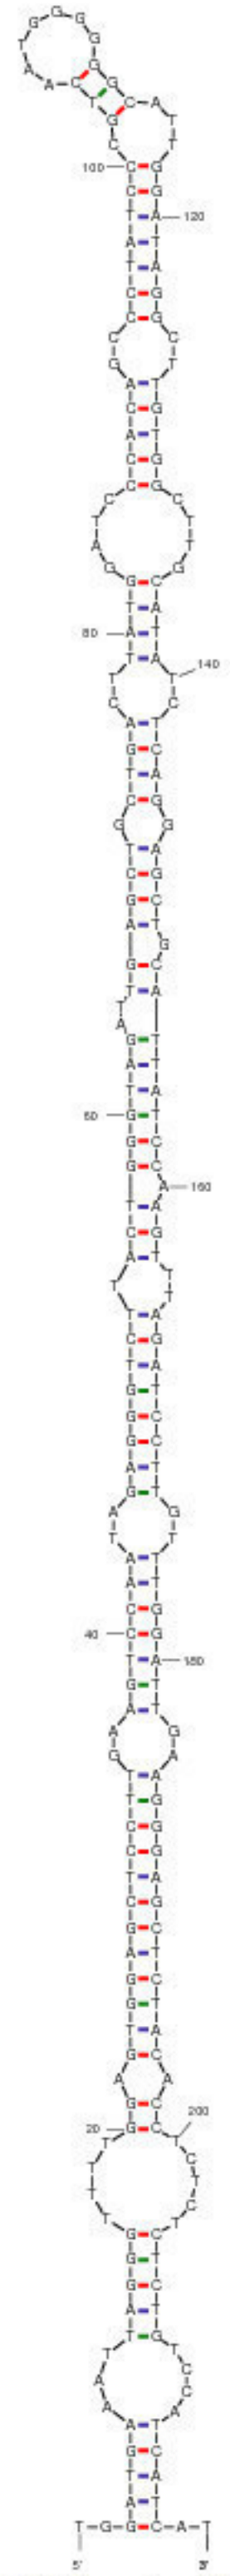

$dG = -99.3$  vvi-miR159c

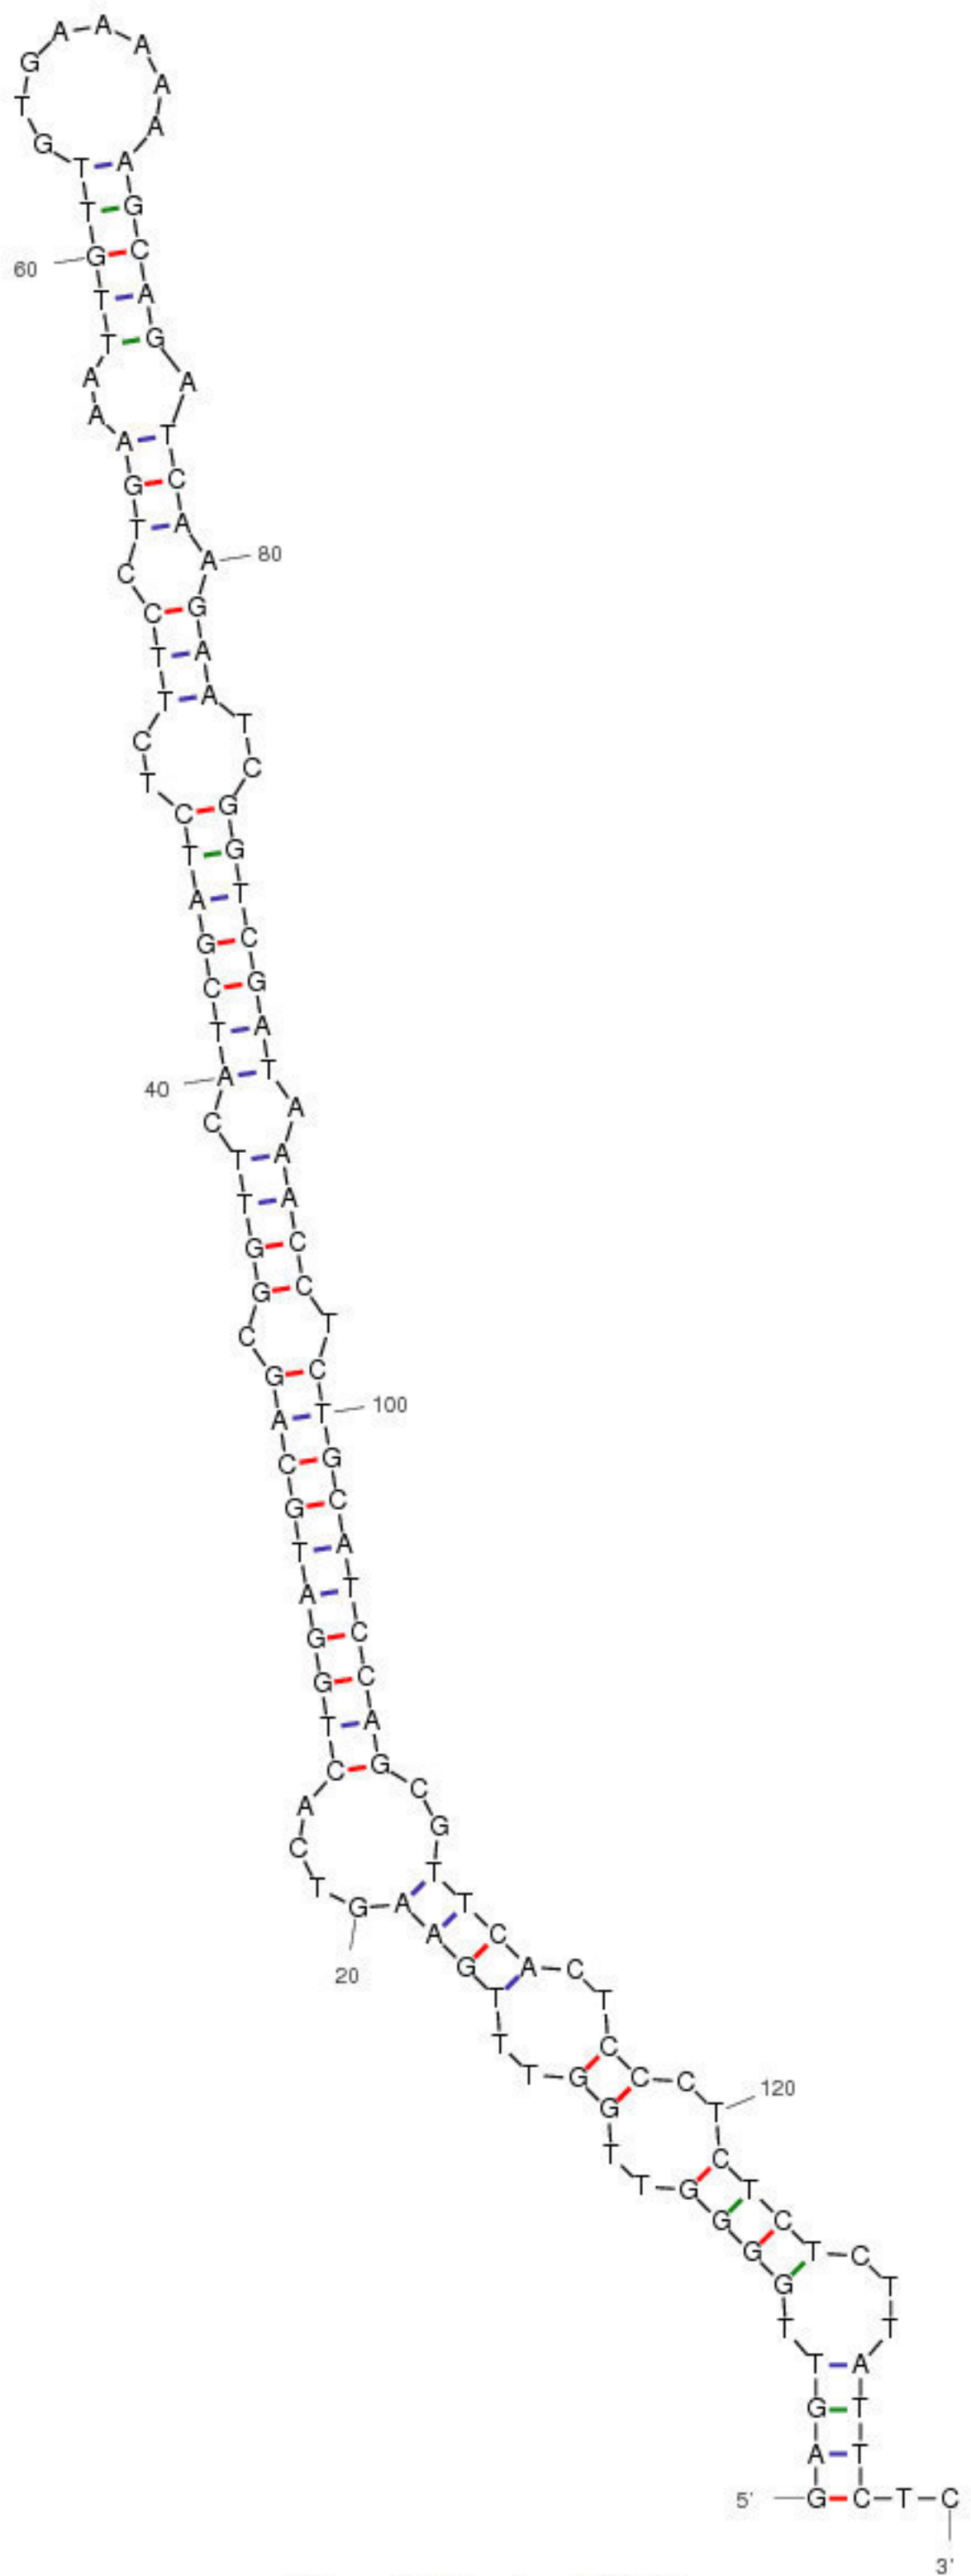

*dG = -50.4 vvi-miR162*

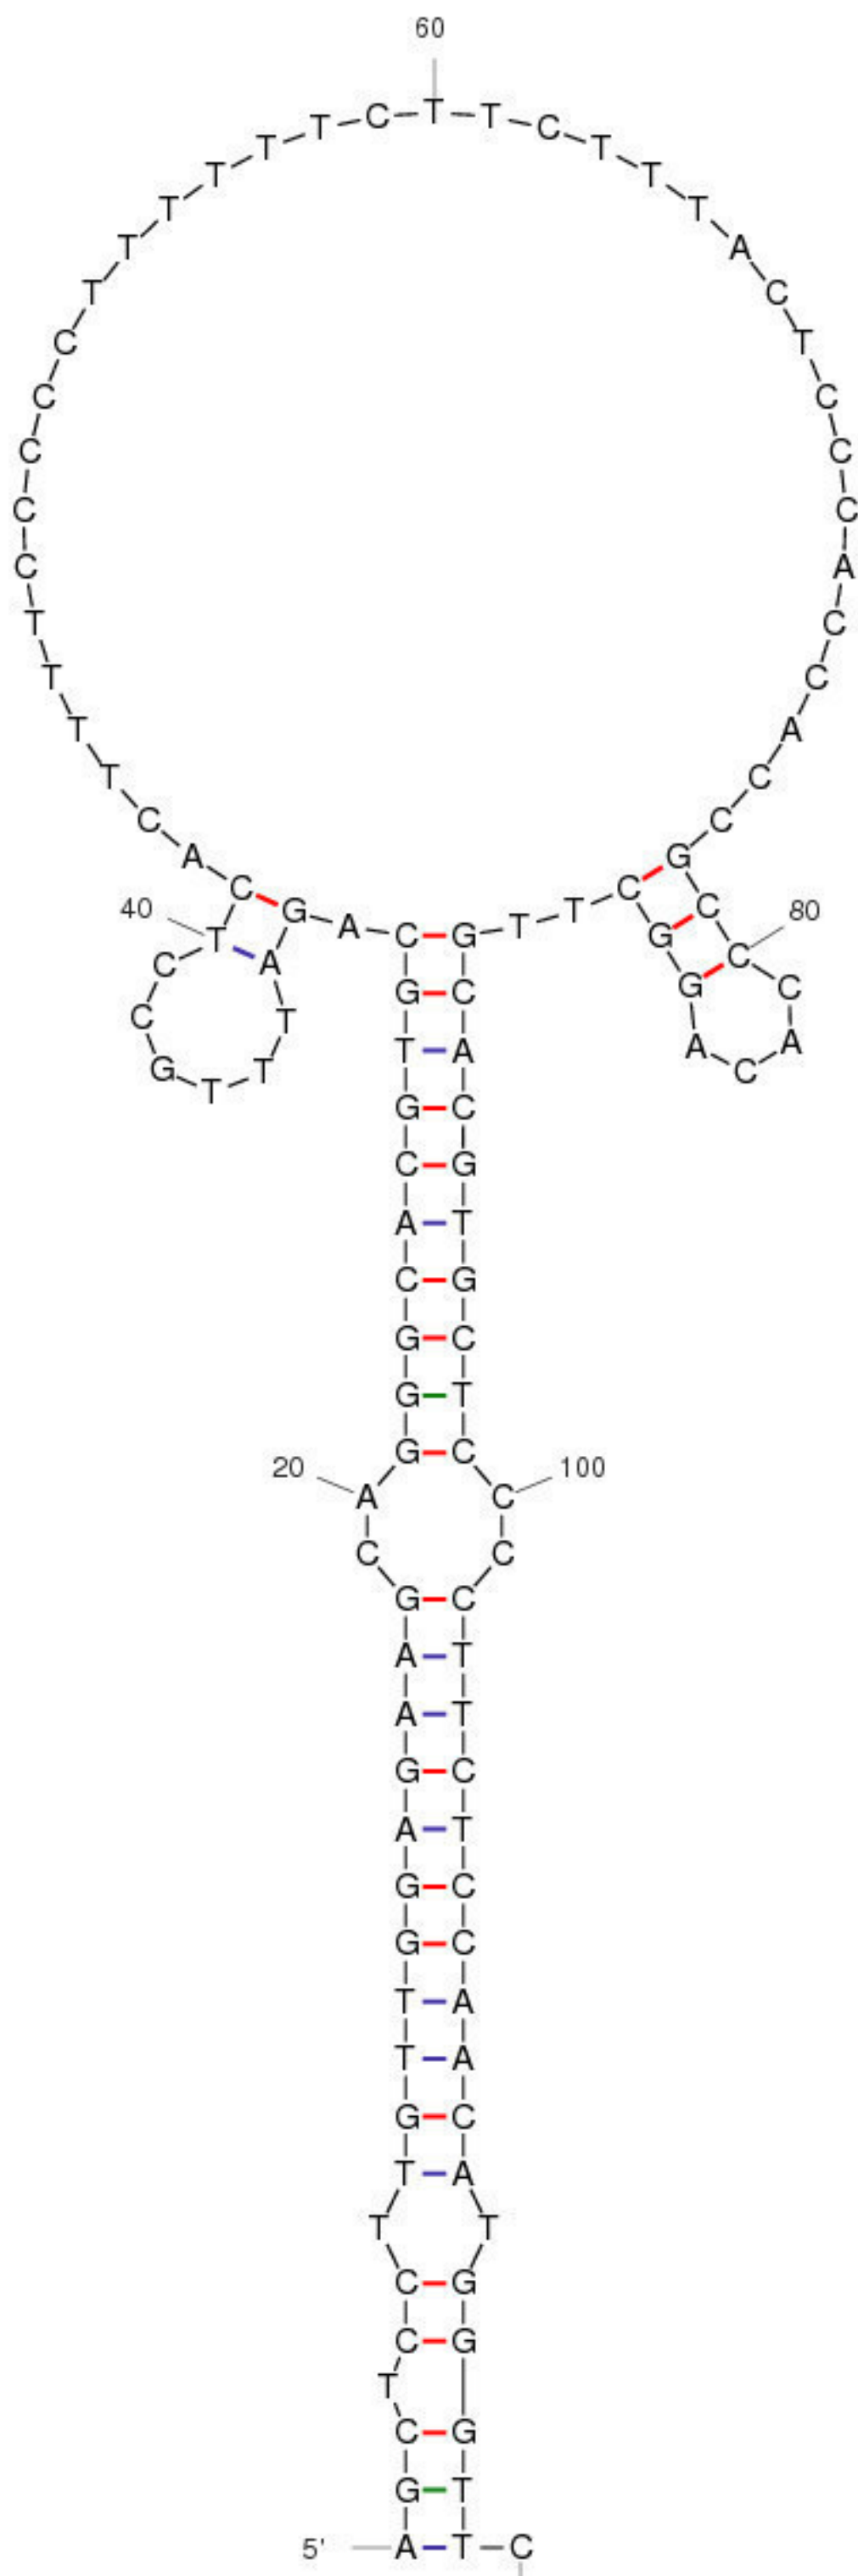

$dG = -44.9$  vvi-miR164a

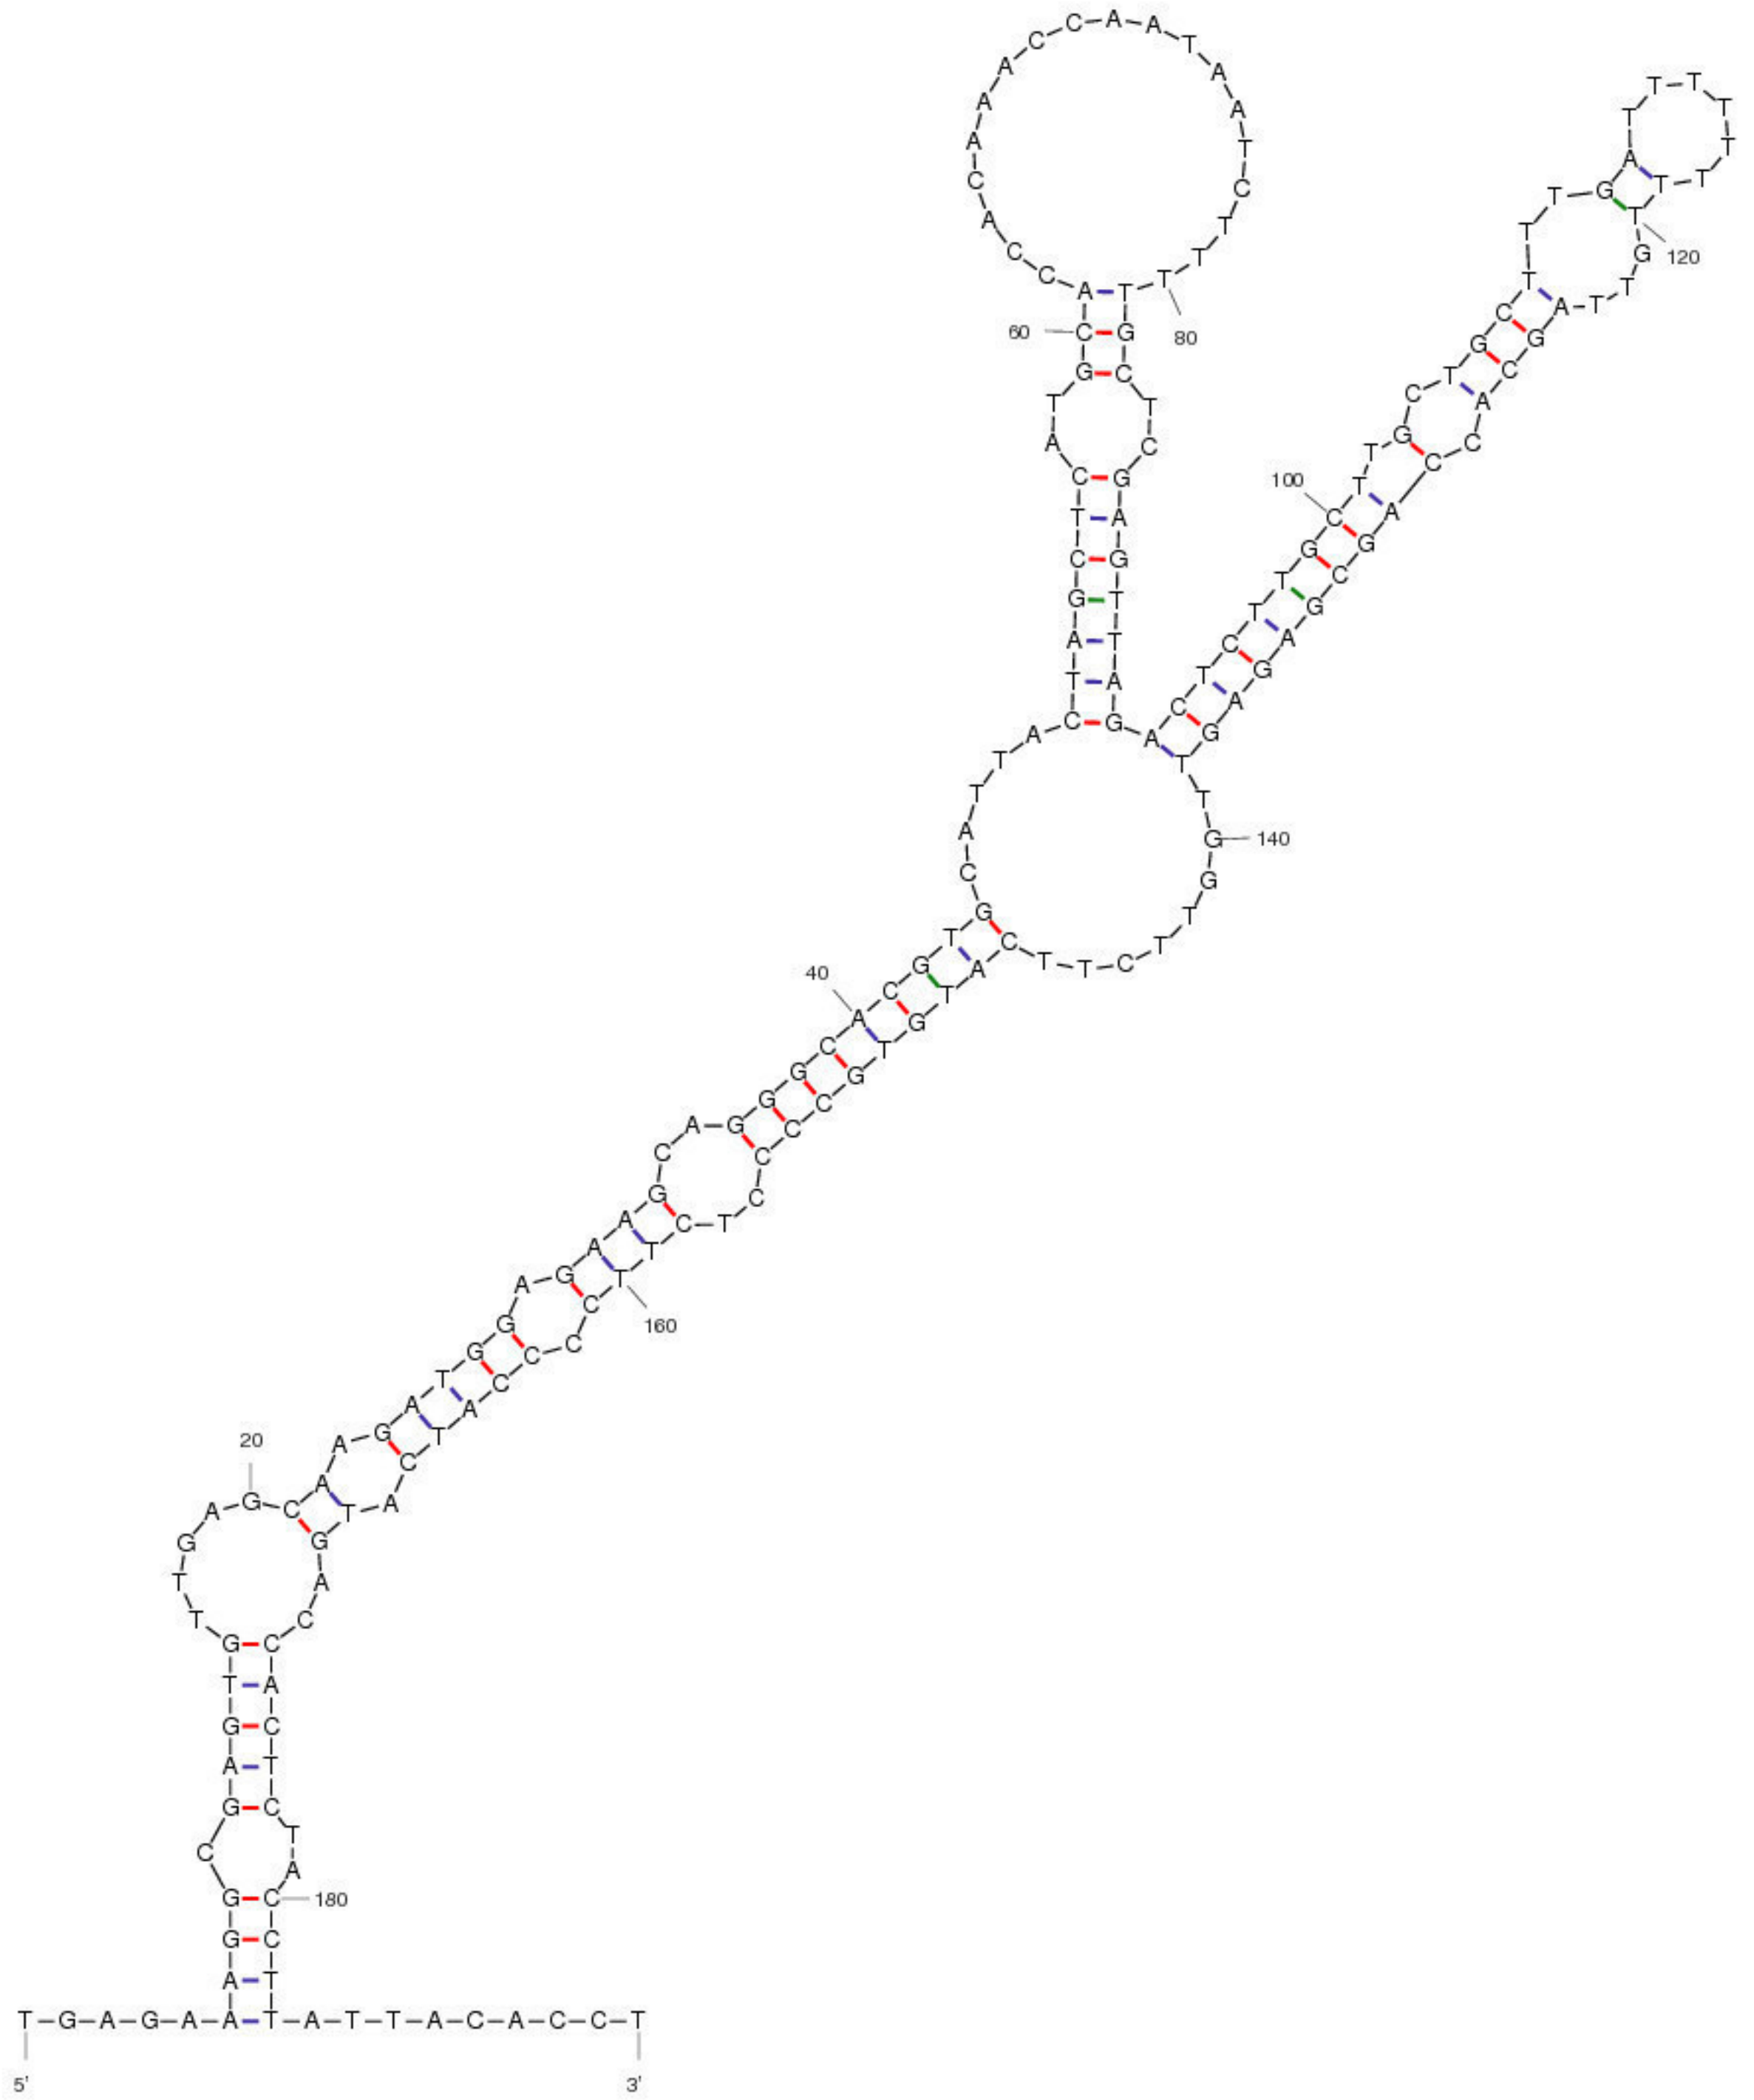

$dG = -64.1$  vvi-miR164c



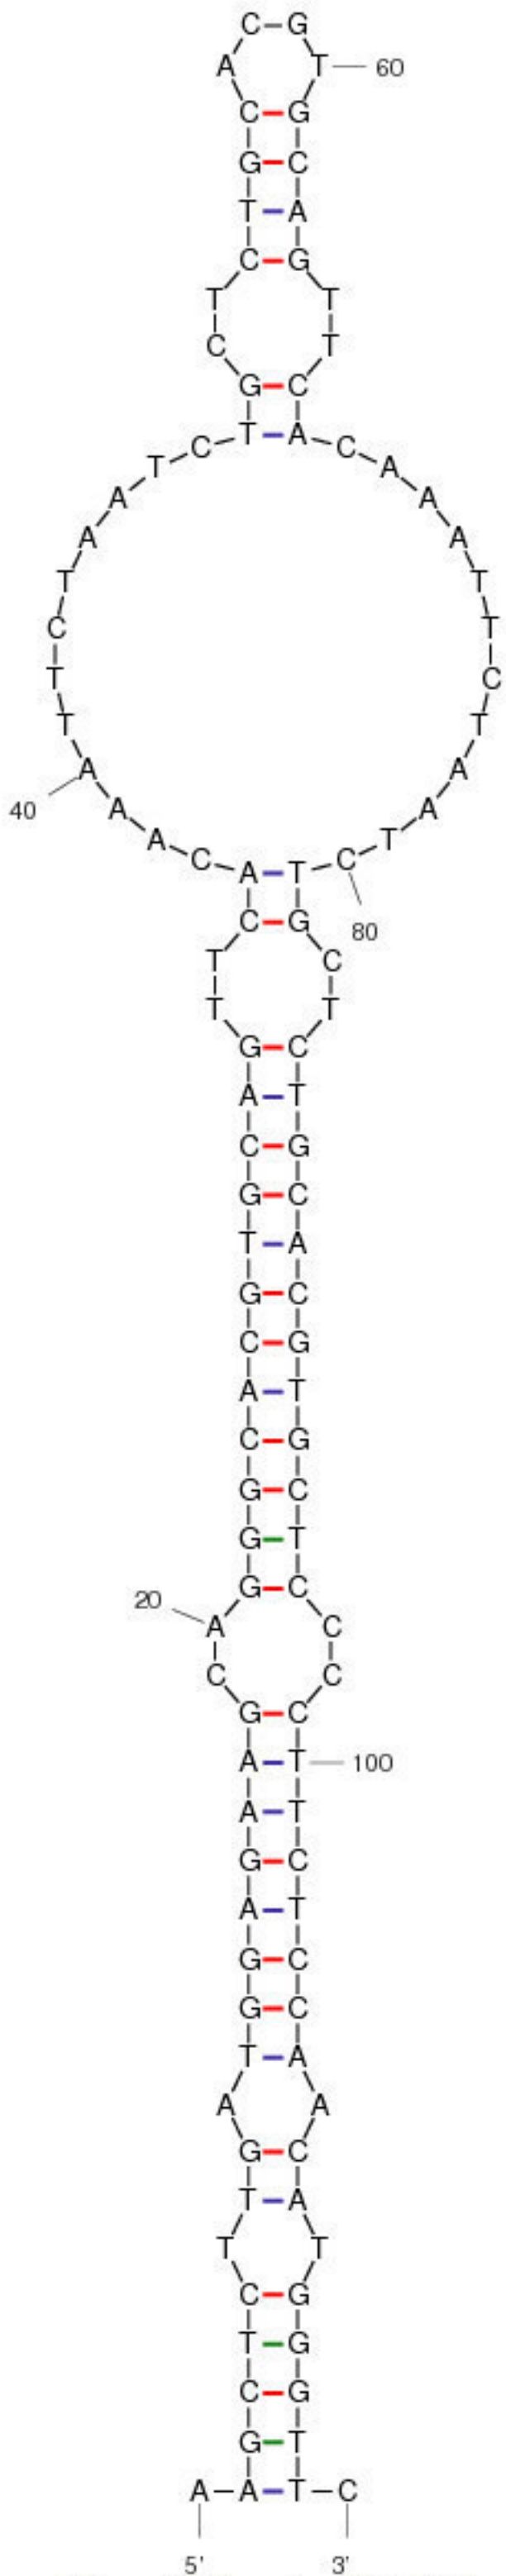

*dG = -49.3 vvi-miR164d*

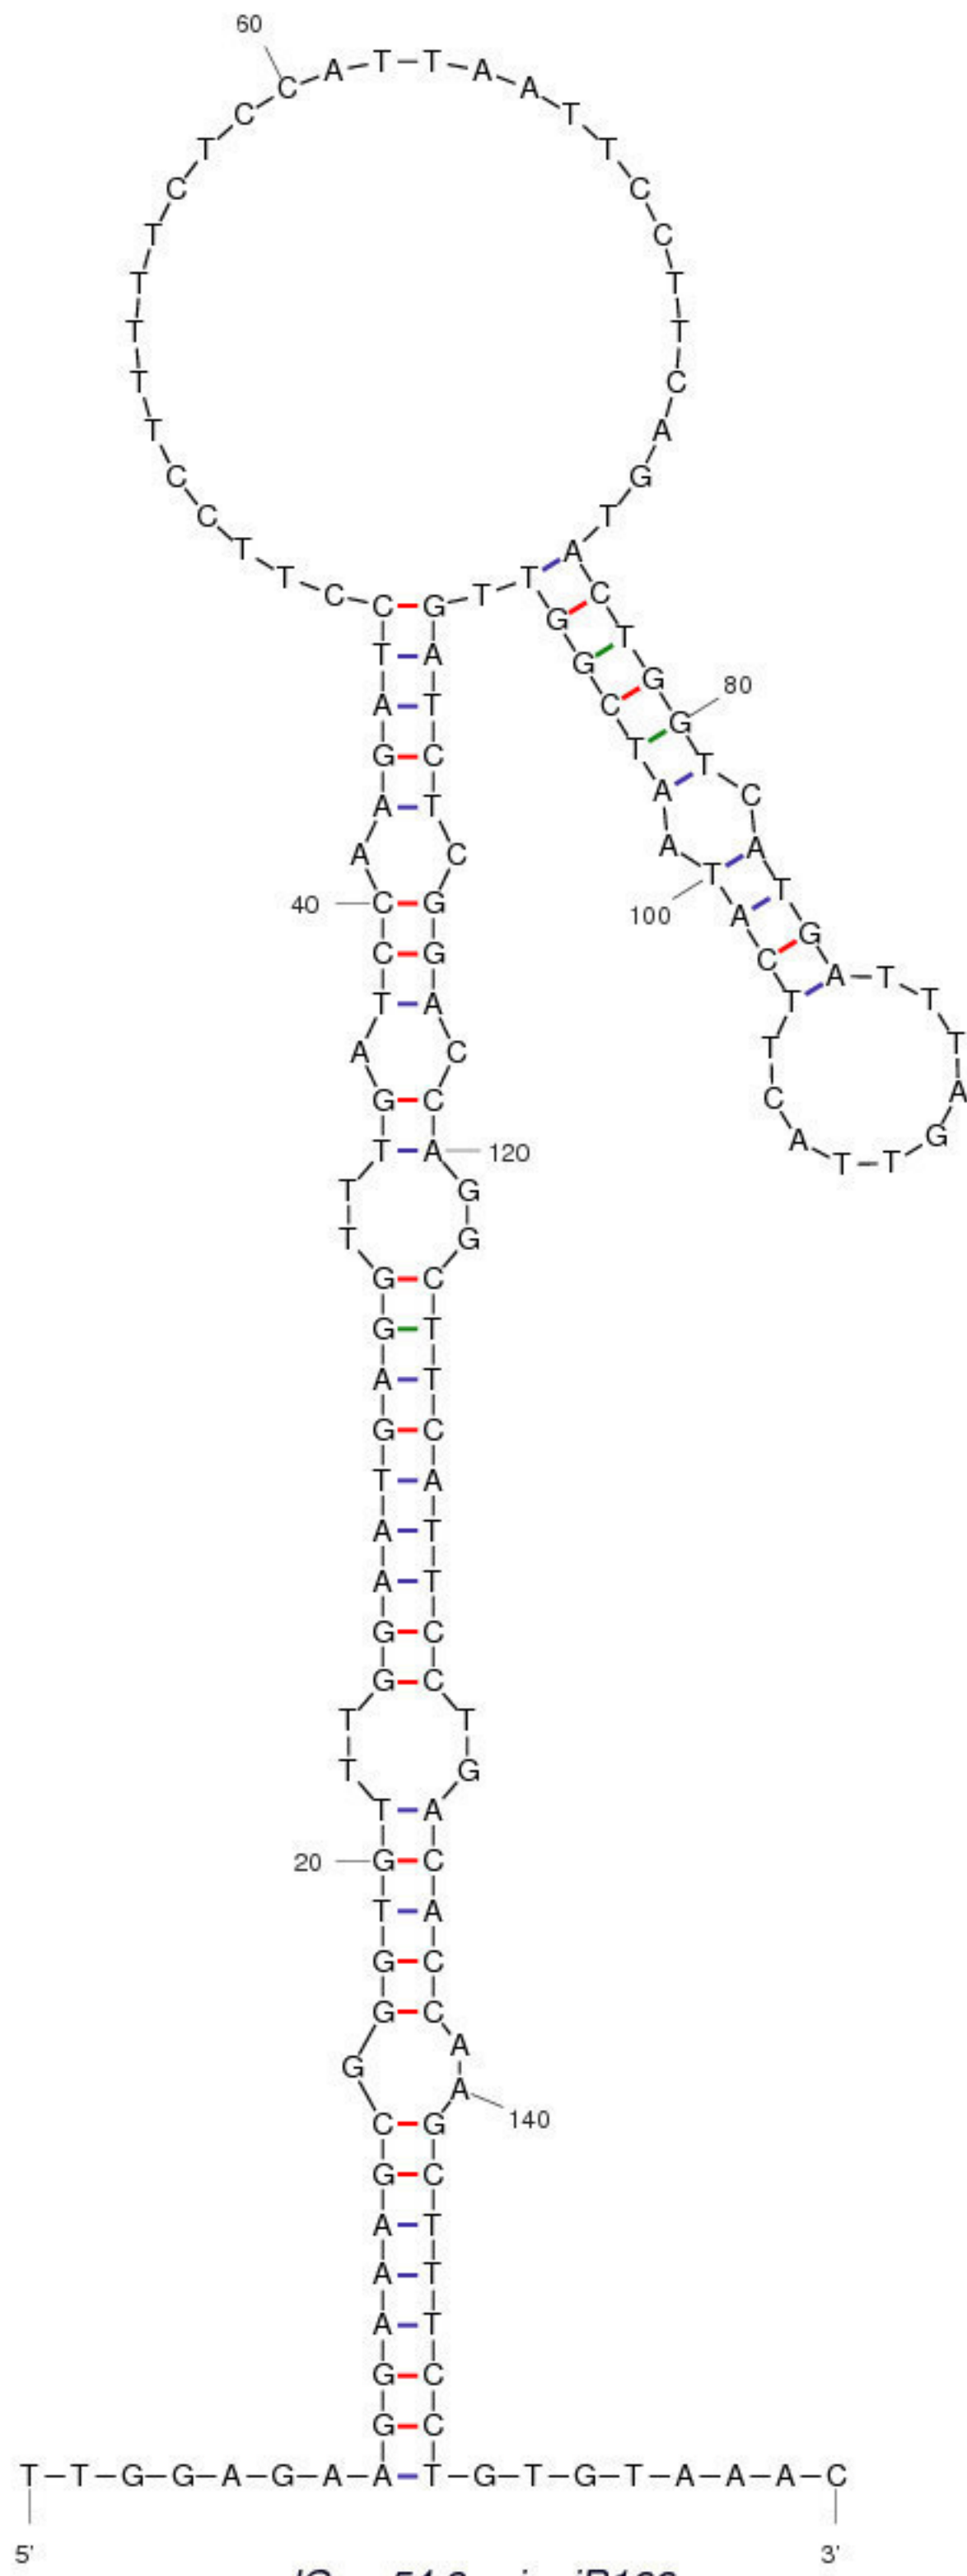

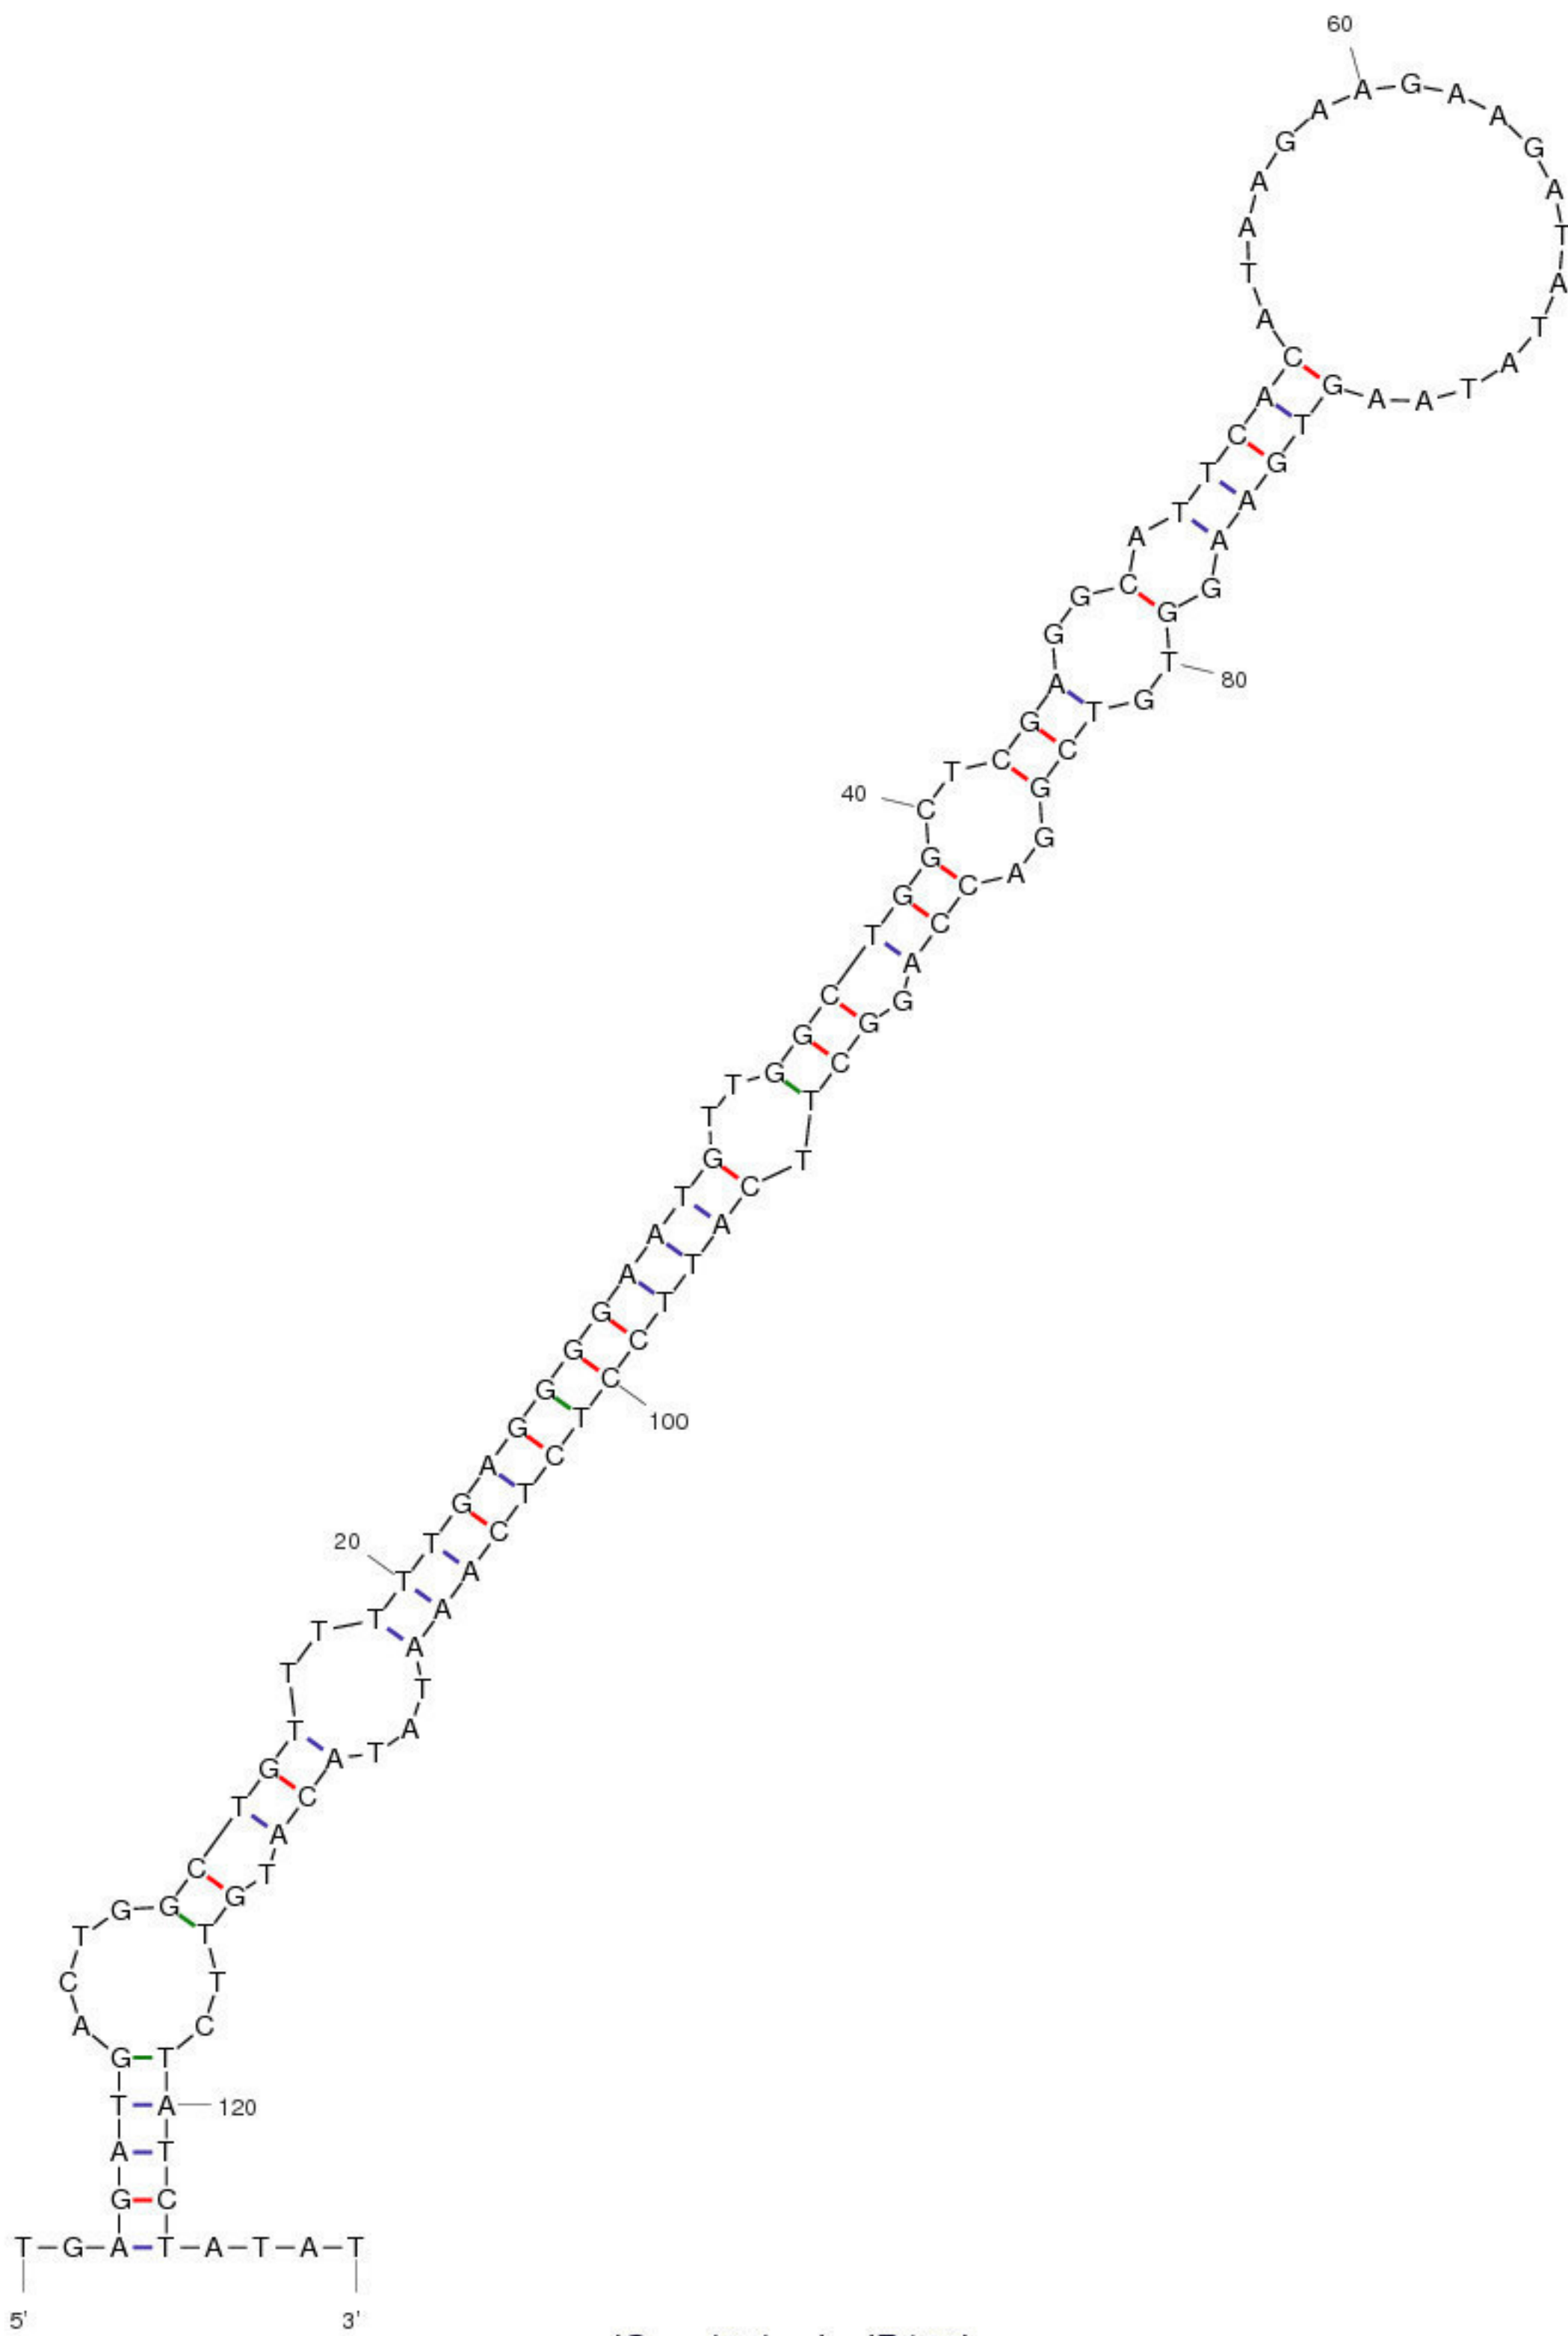

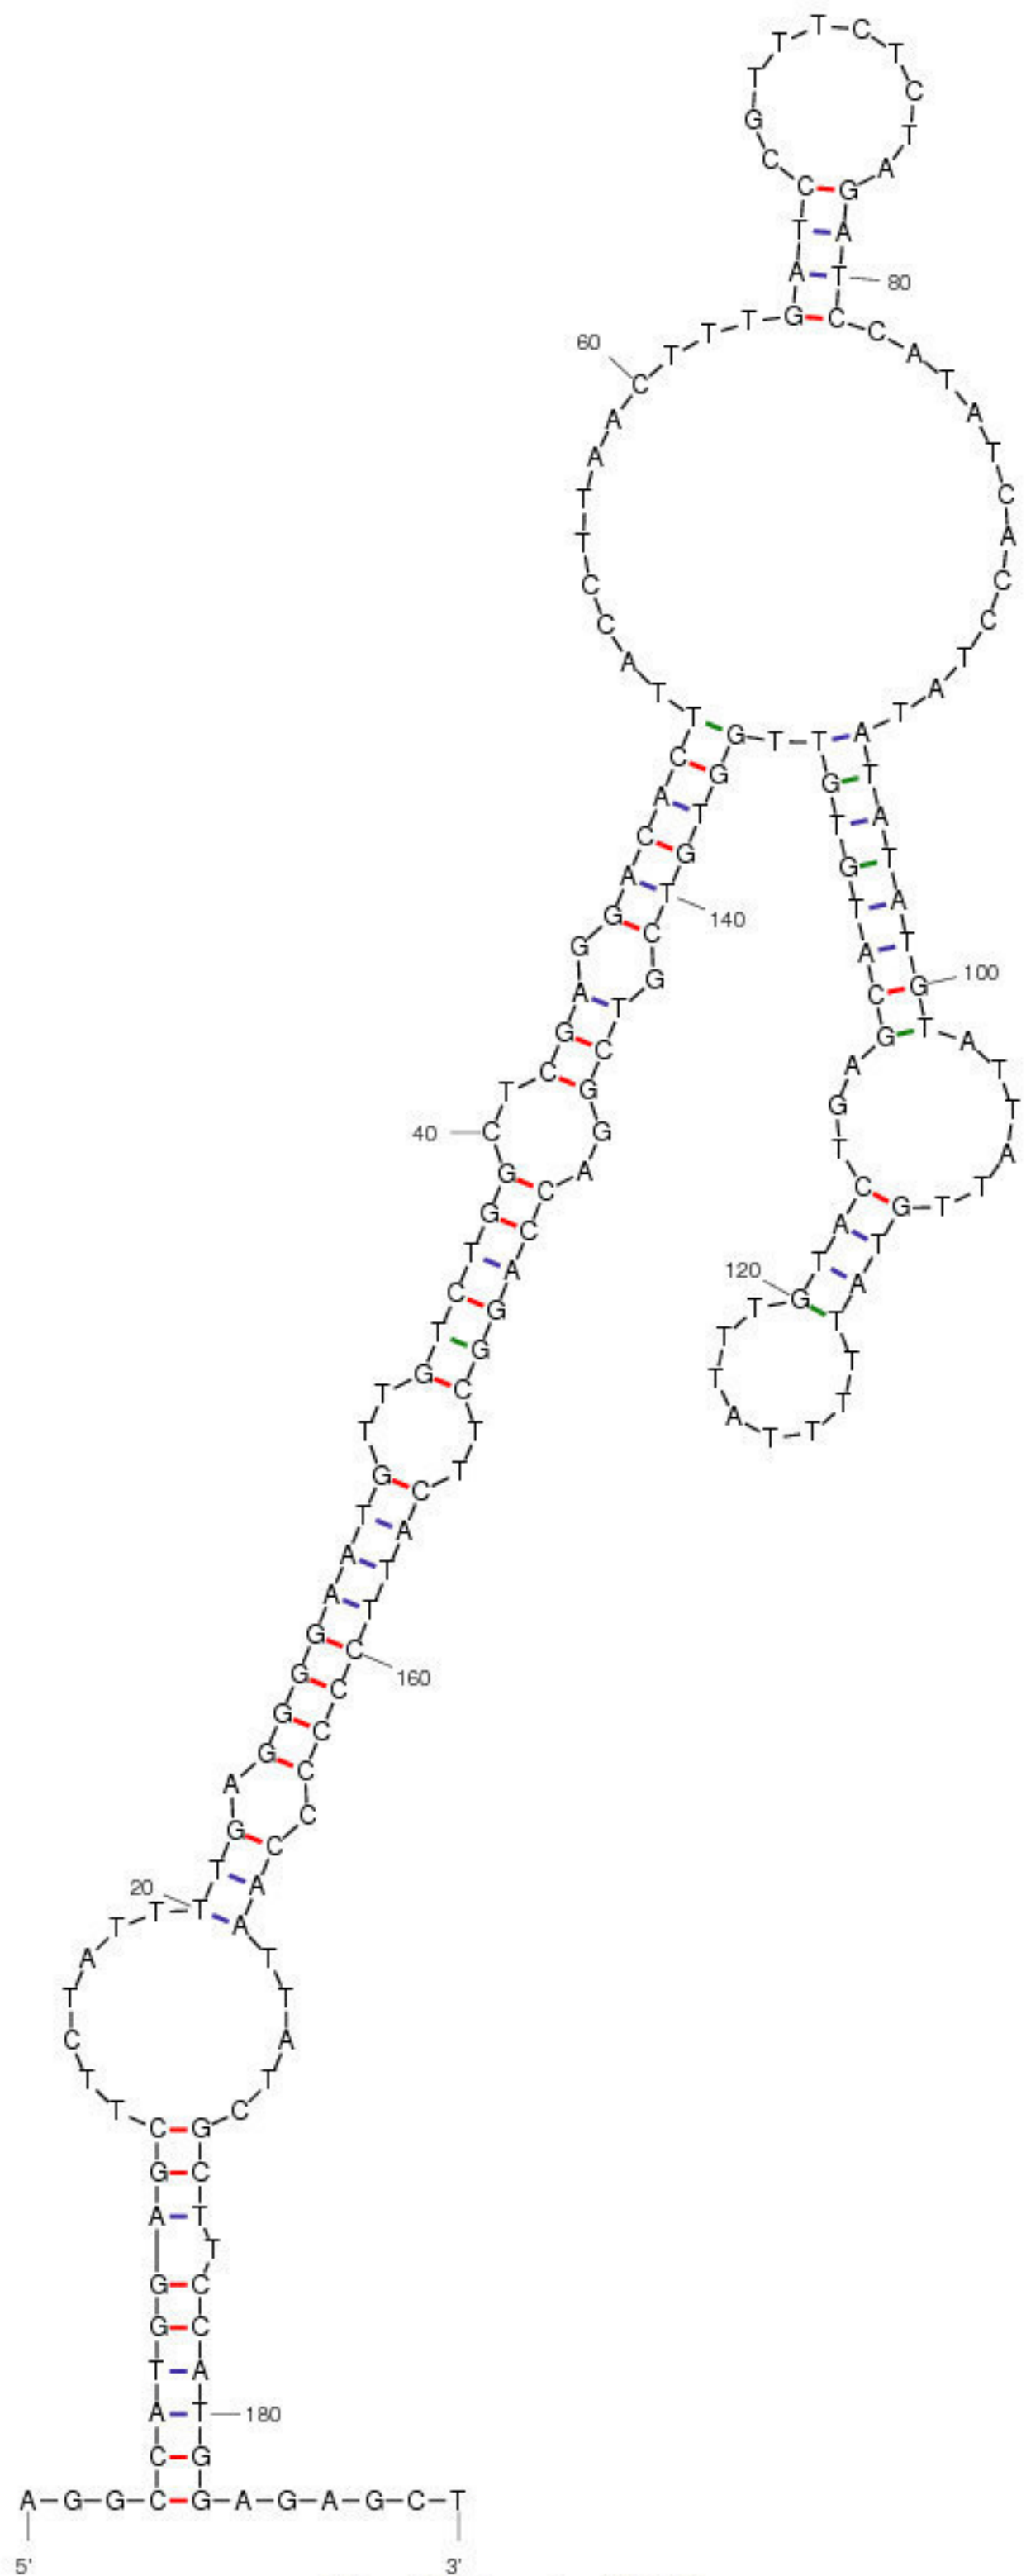

$dG = -64.9$  vvi-miR166c

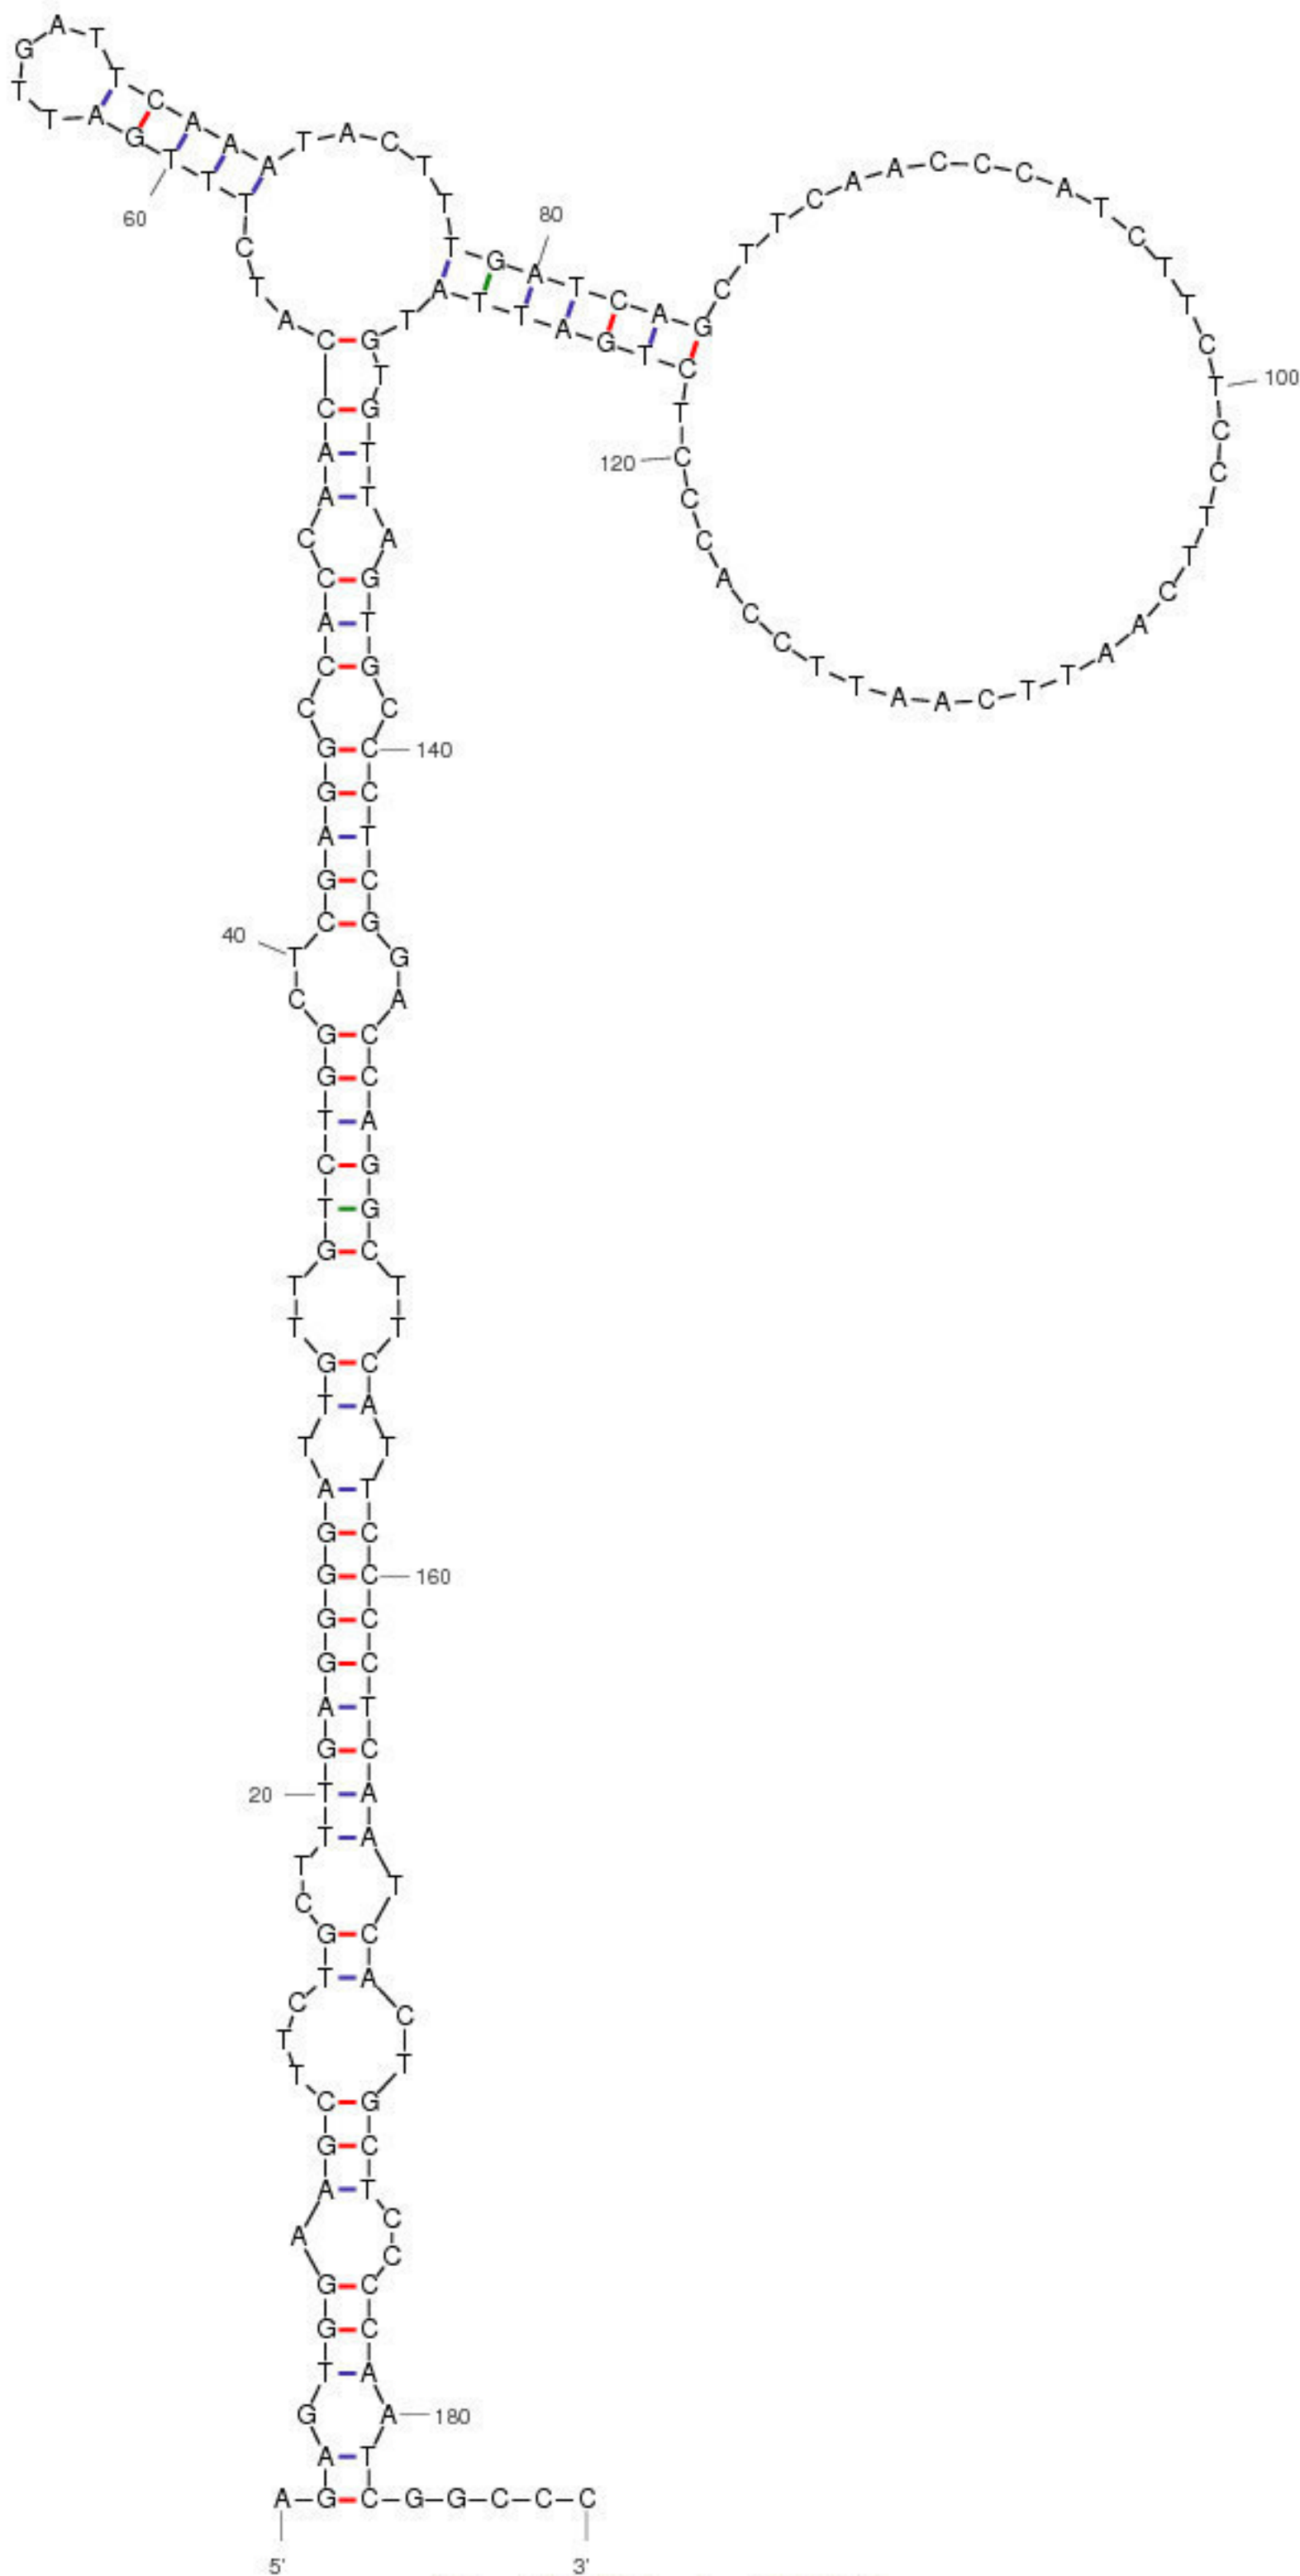

$dG = -59.274$  vvi-miR166d

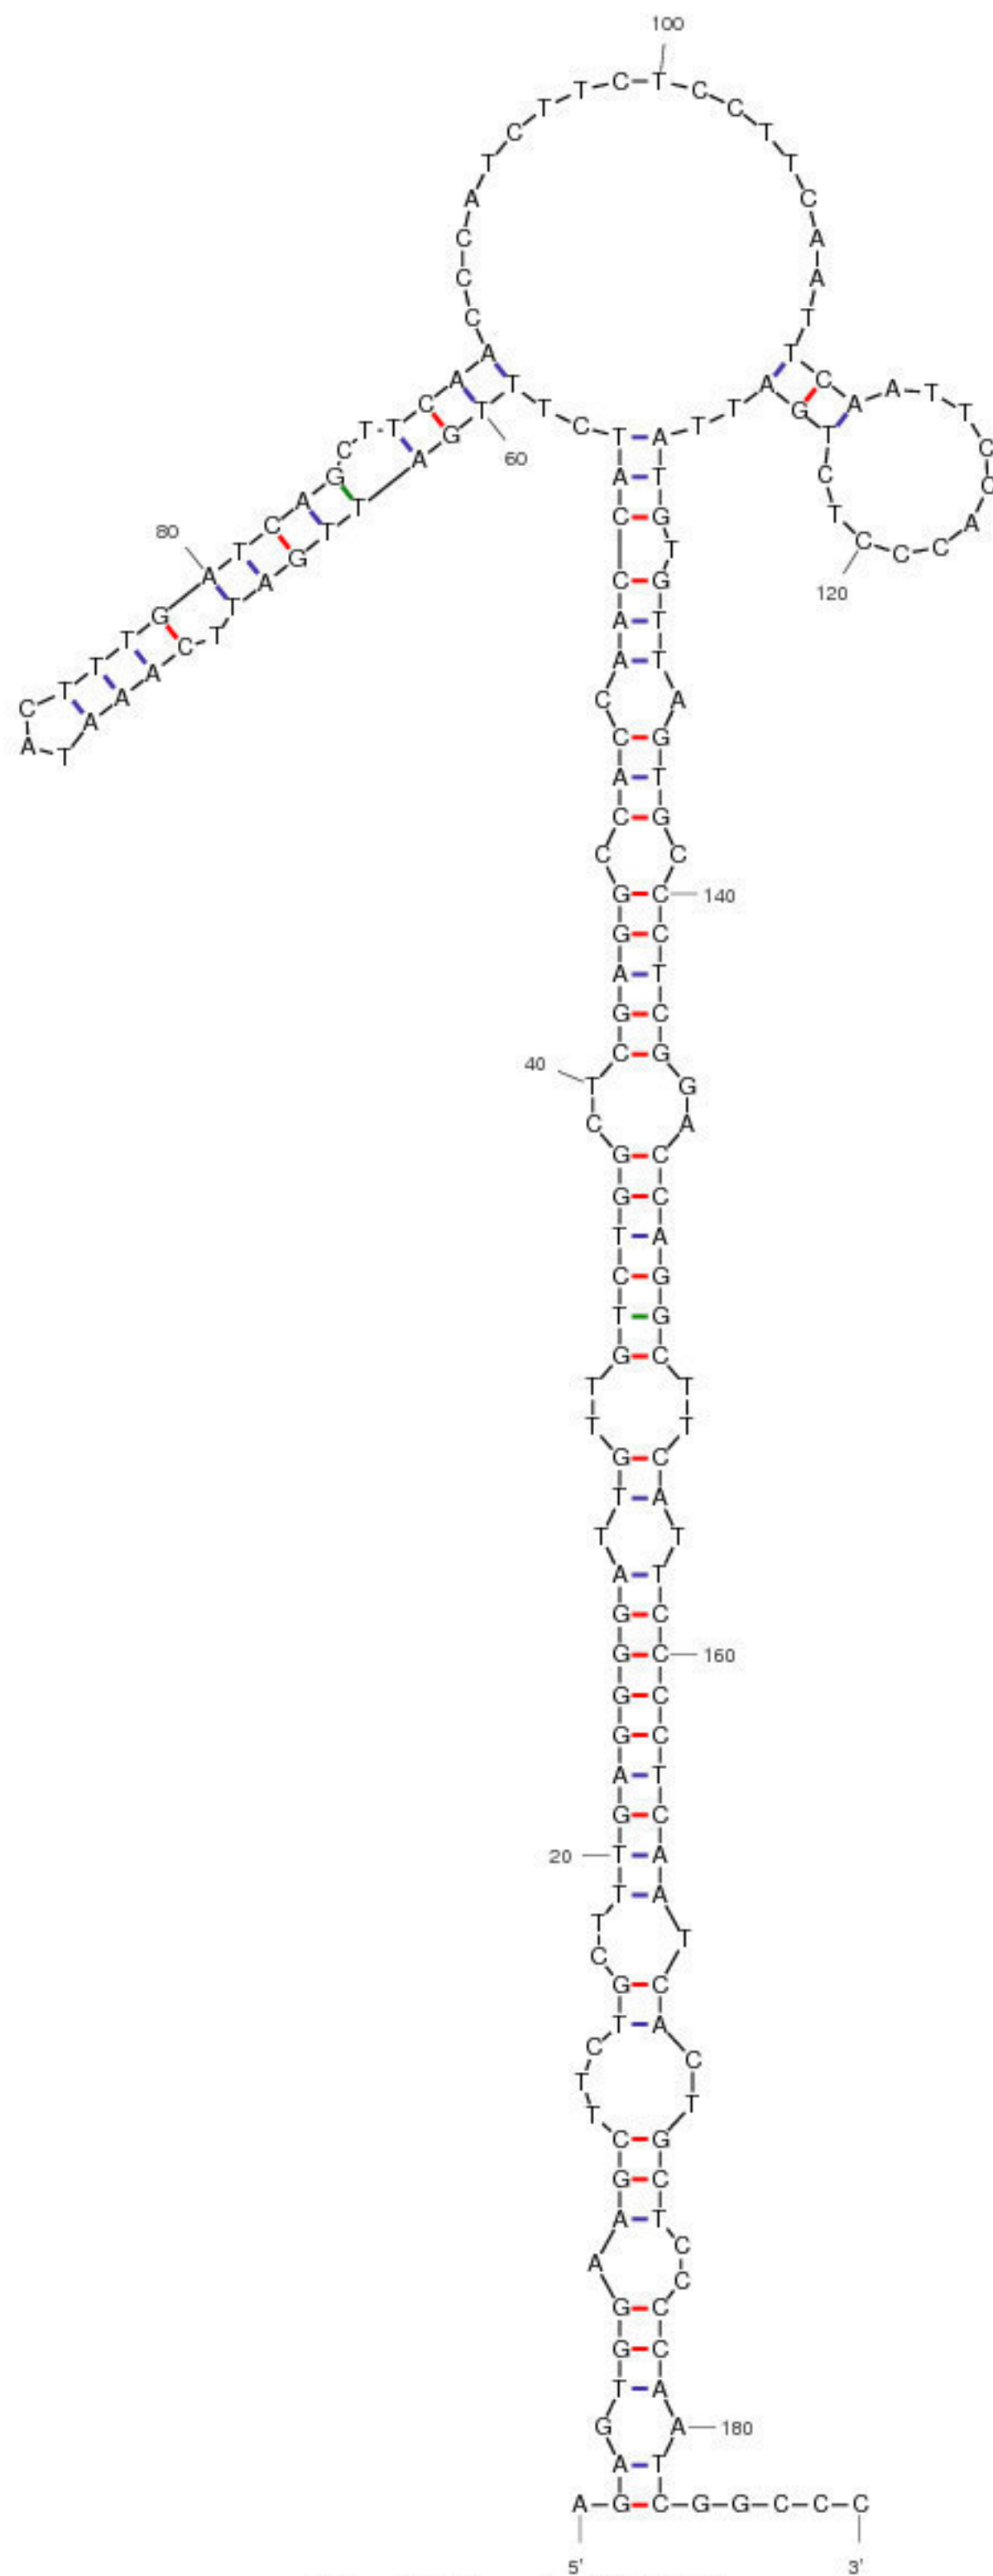

$dG = -58.8$  vvi-miR166d

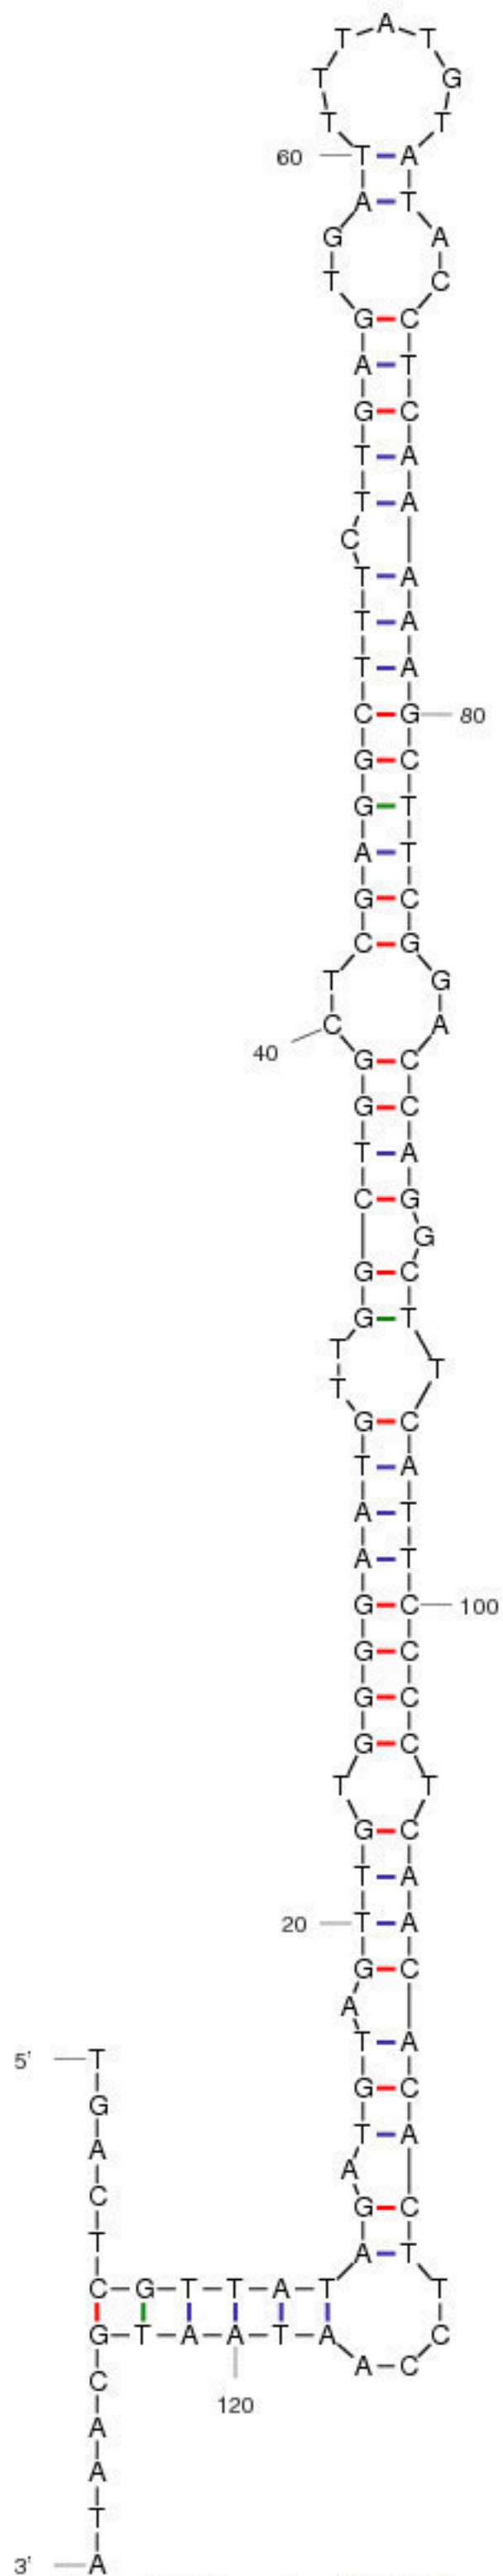

$dG = -50.2$  *vvi-miR166f*

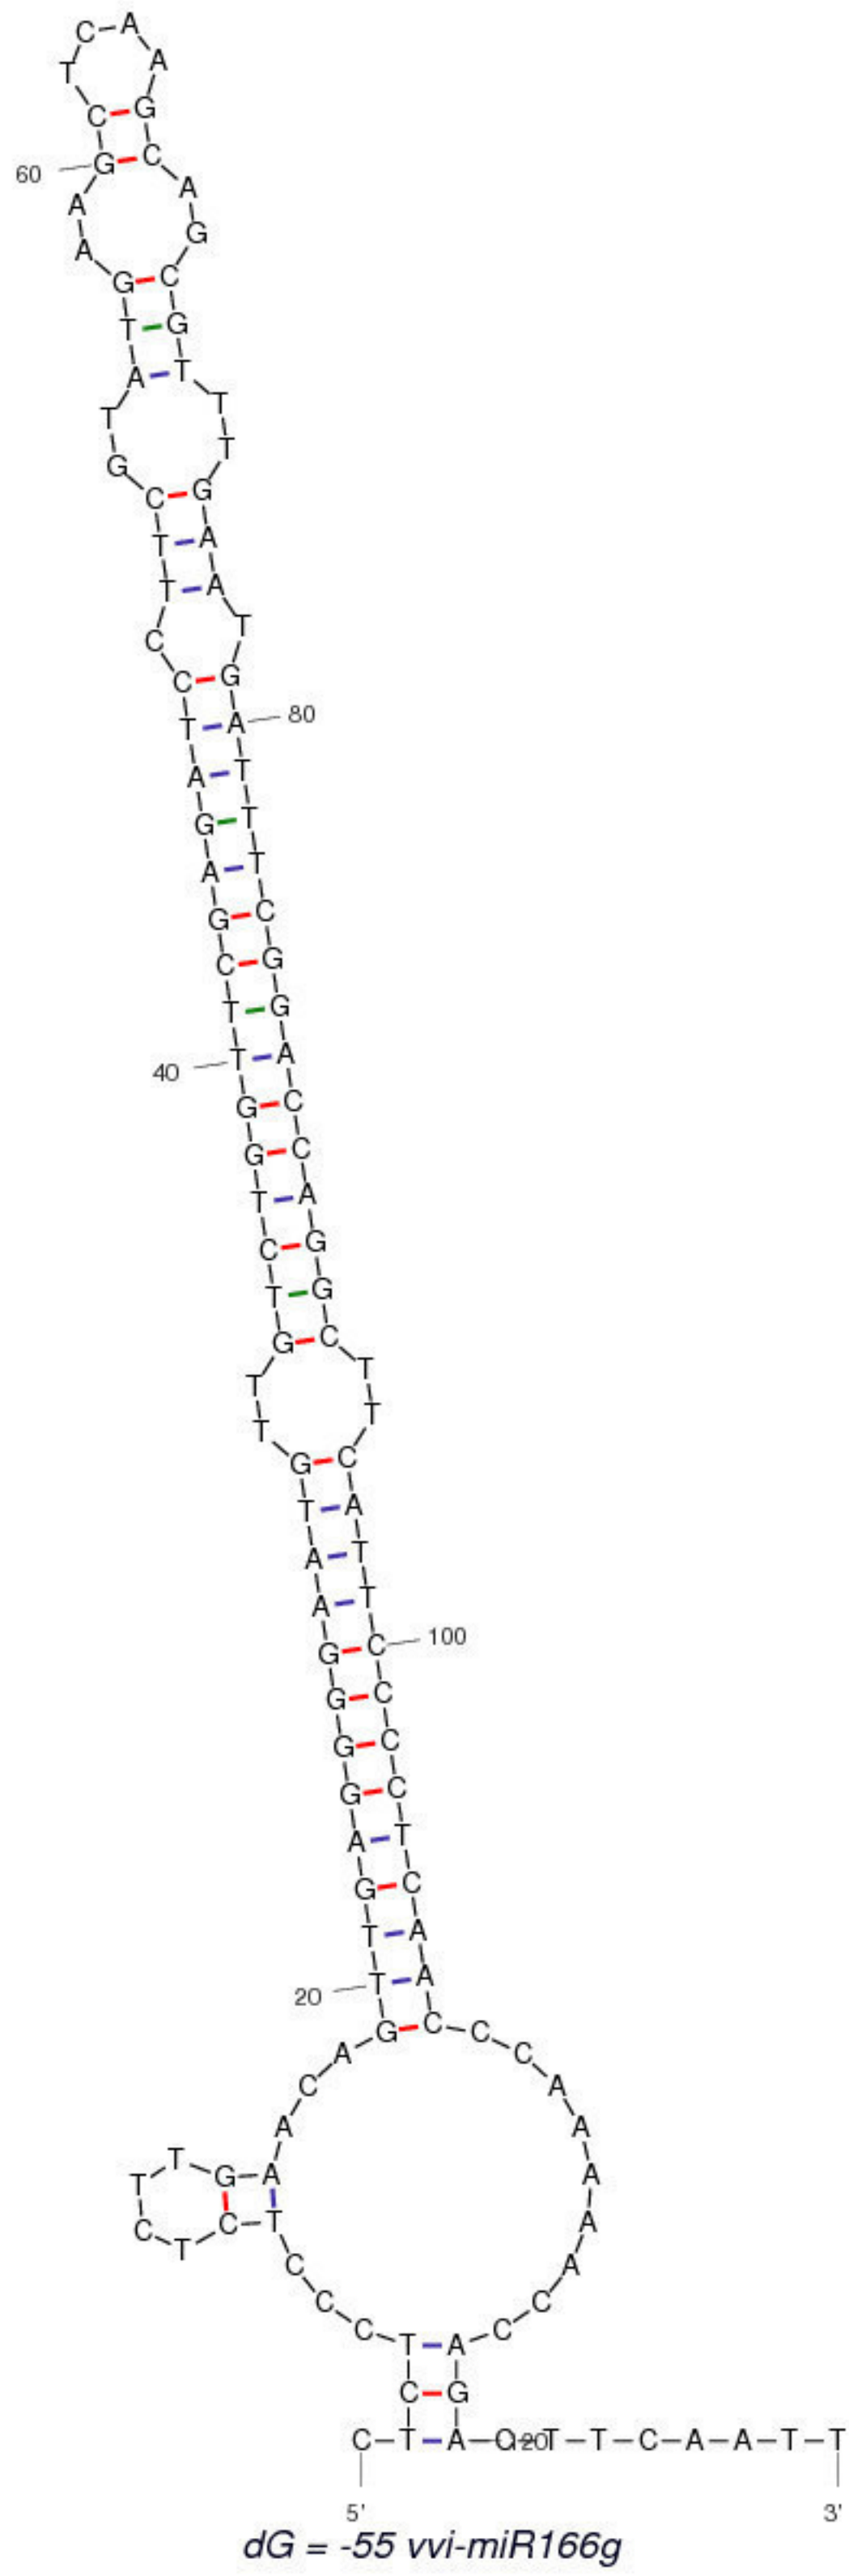



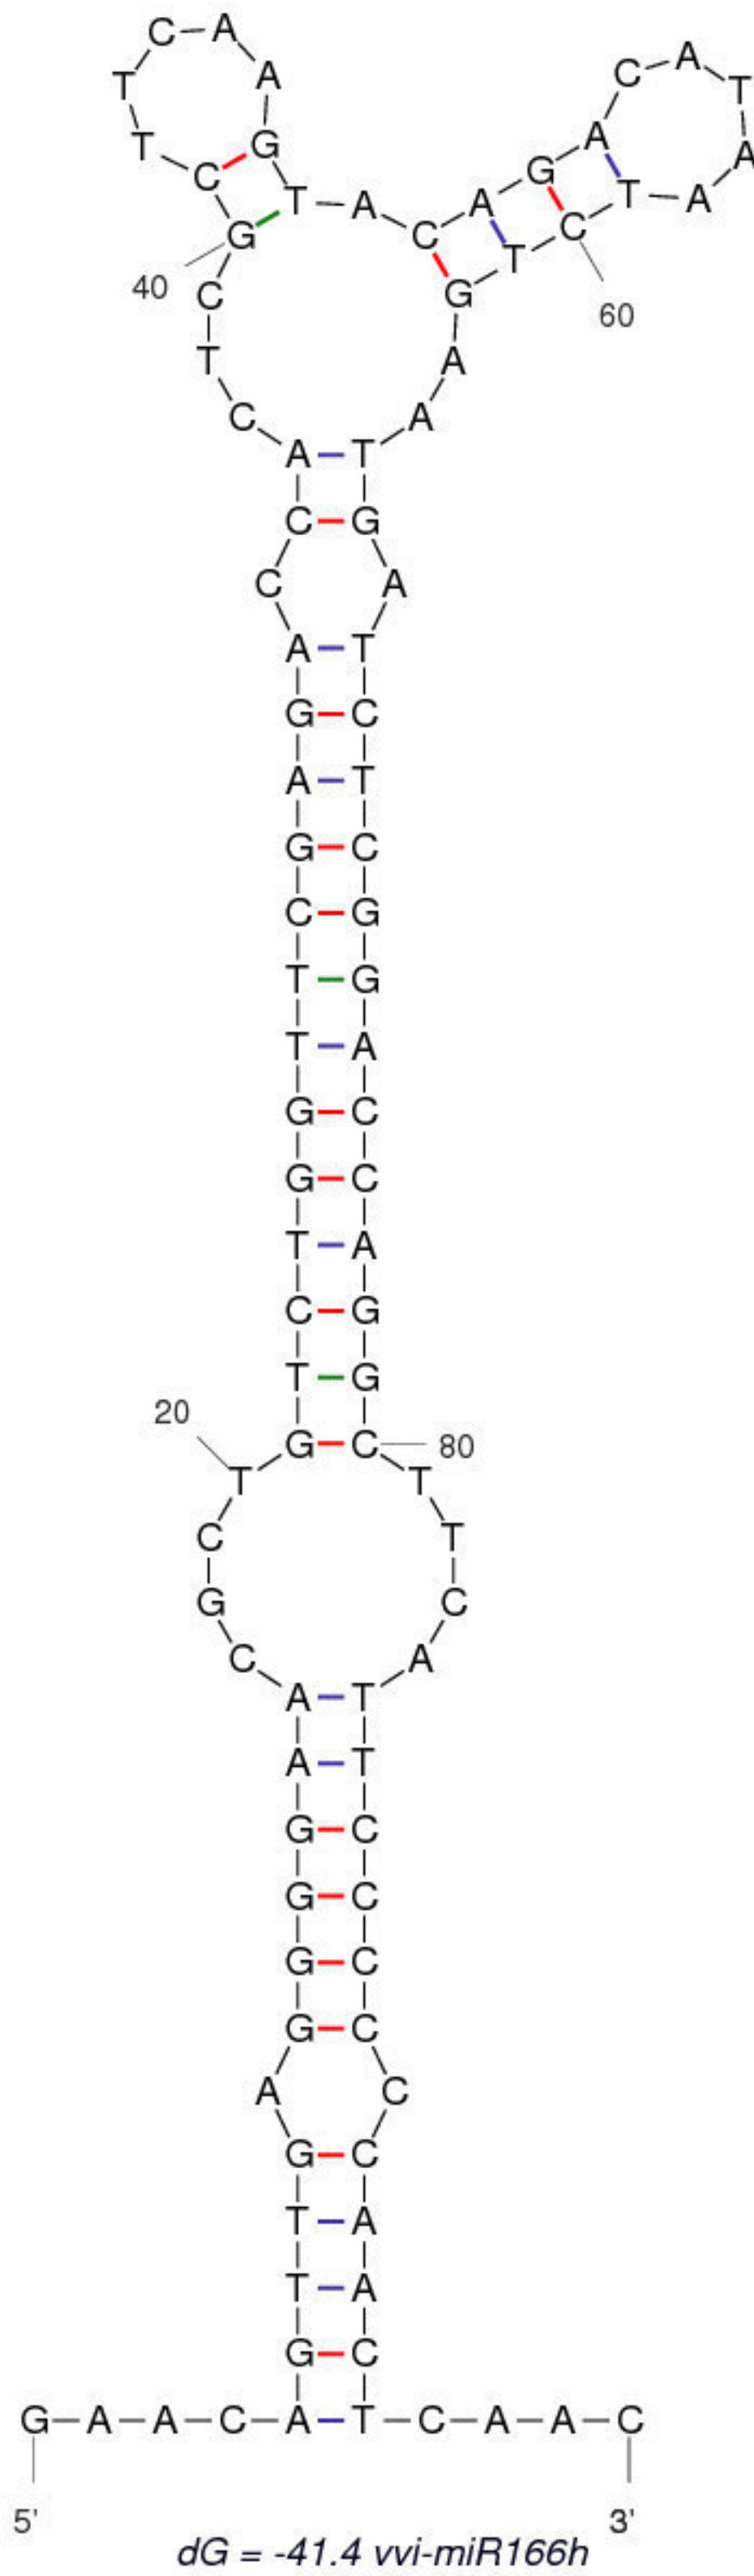

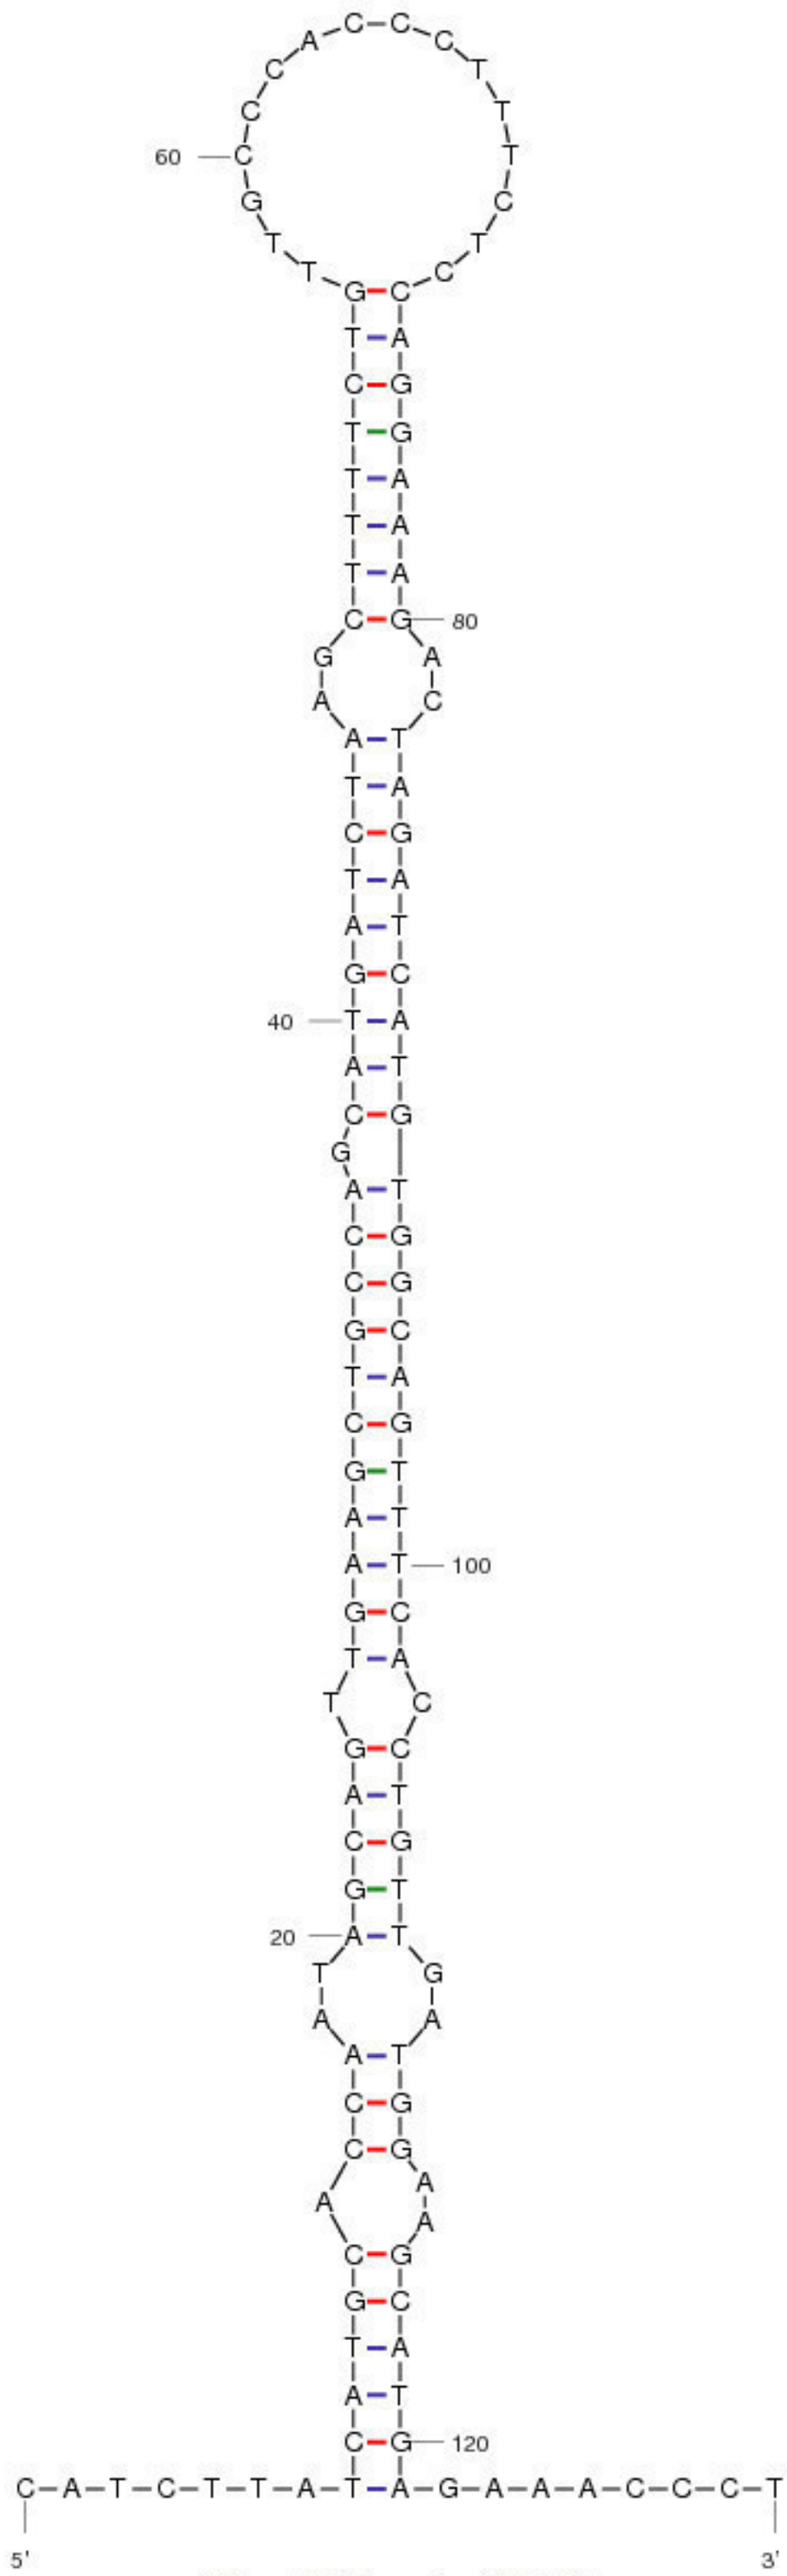

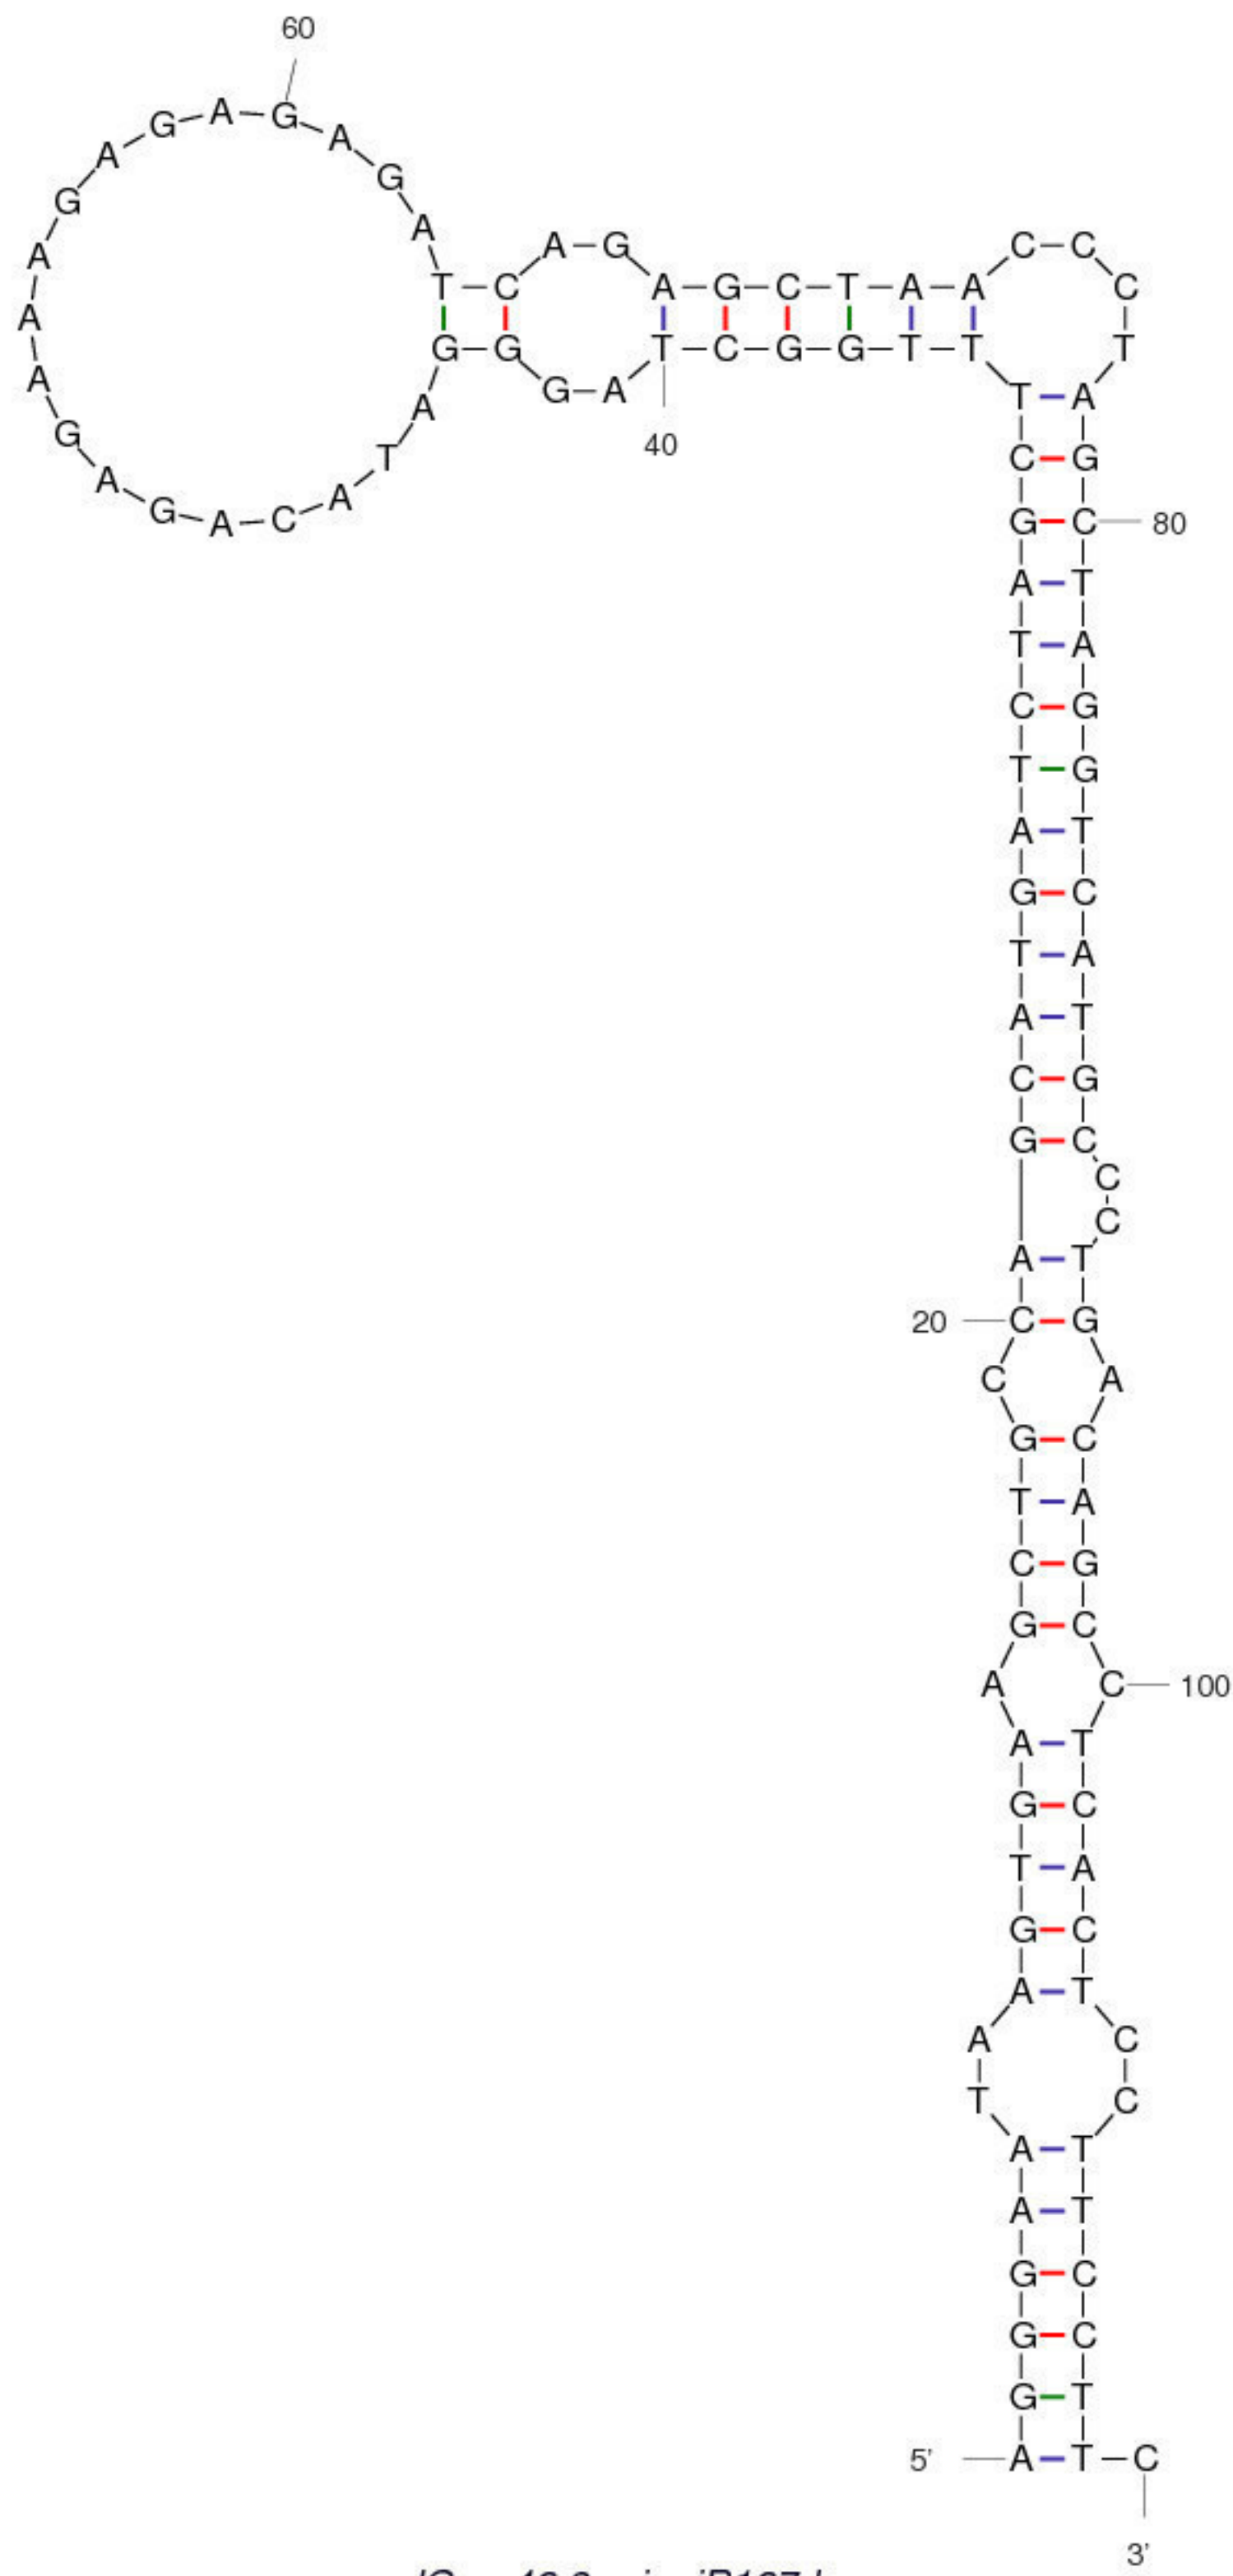

$dG = -46.8$  vvi-miR167d

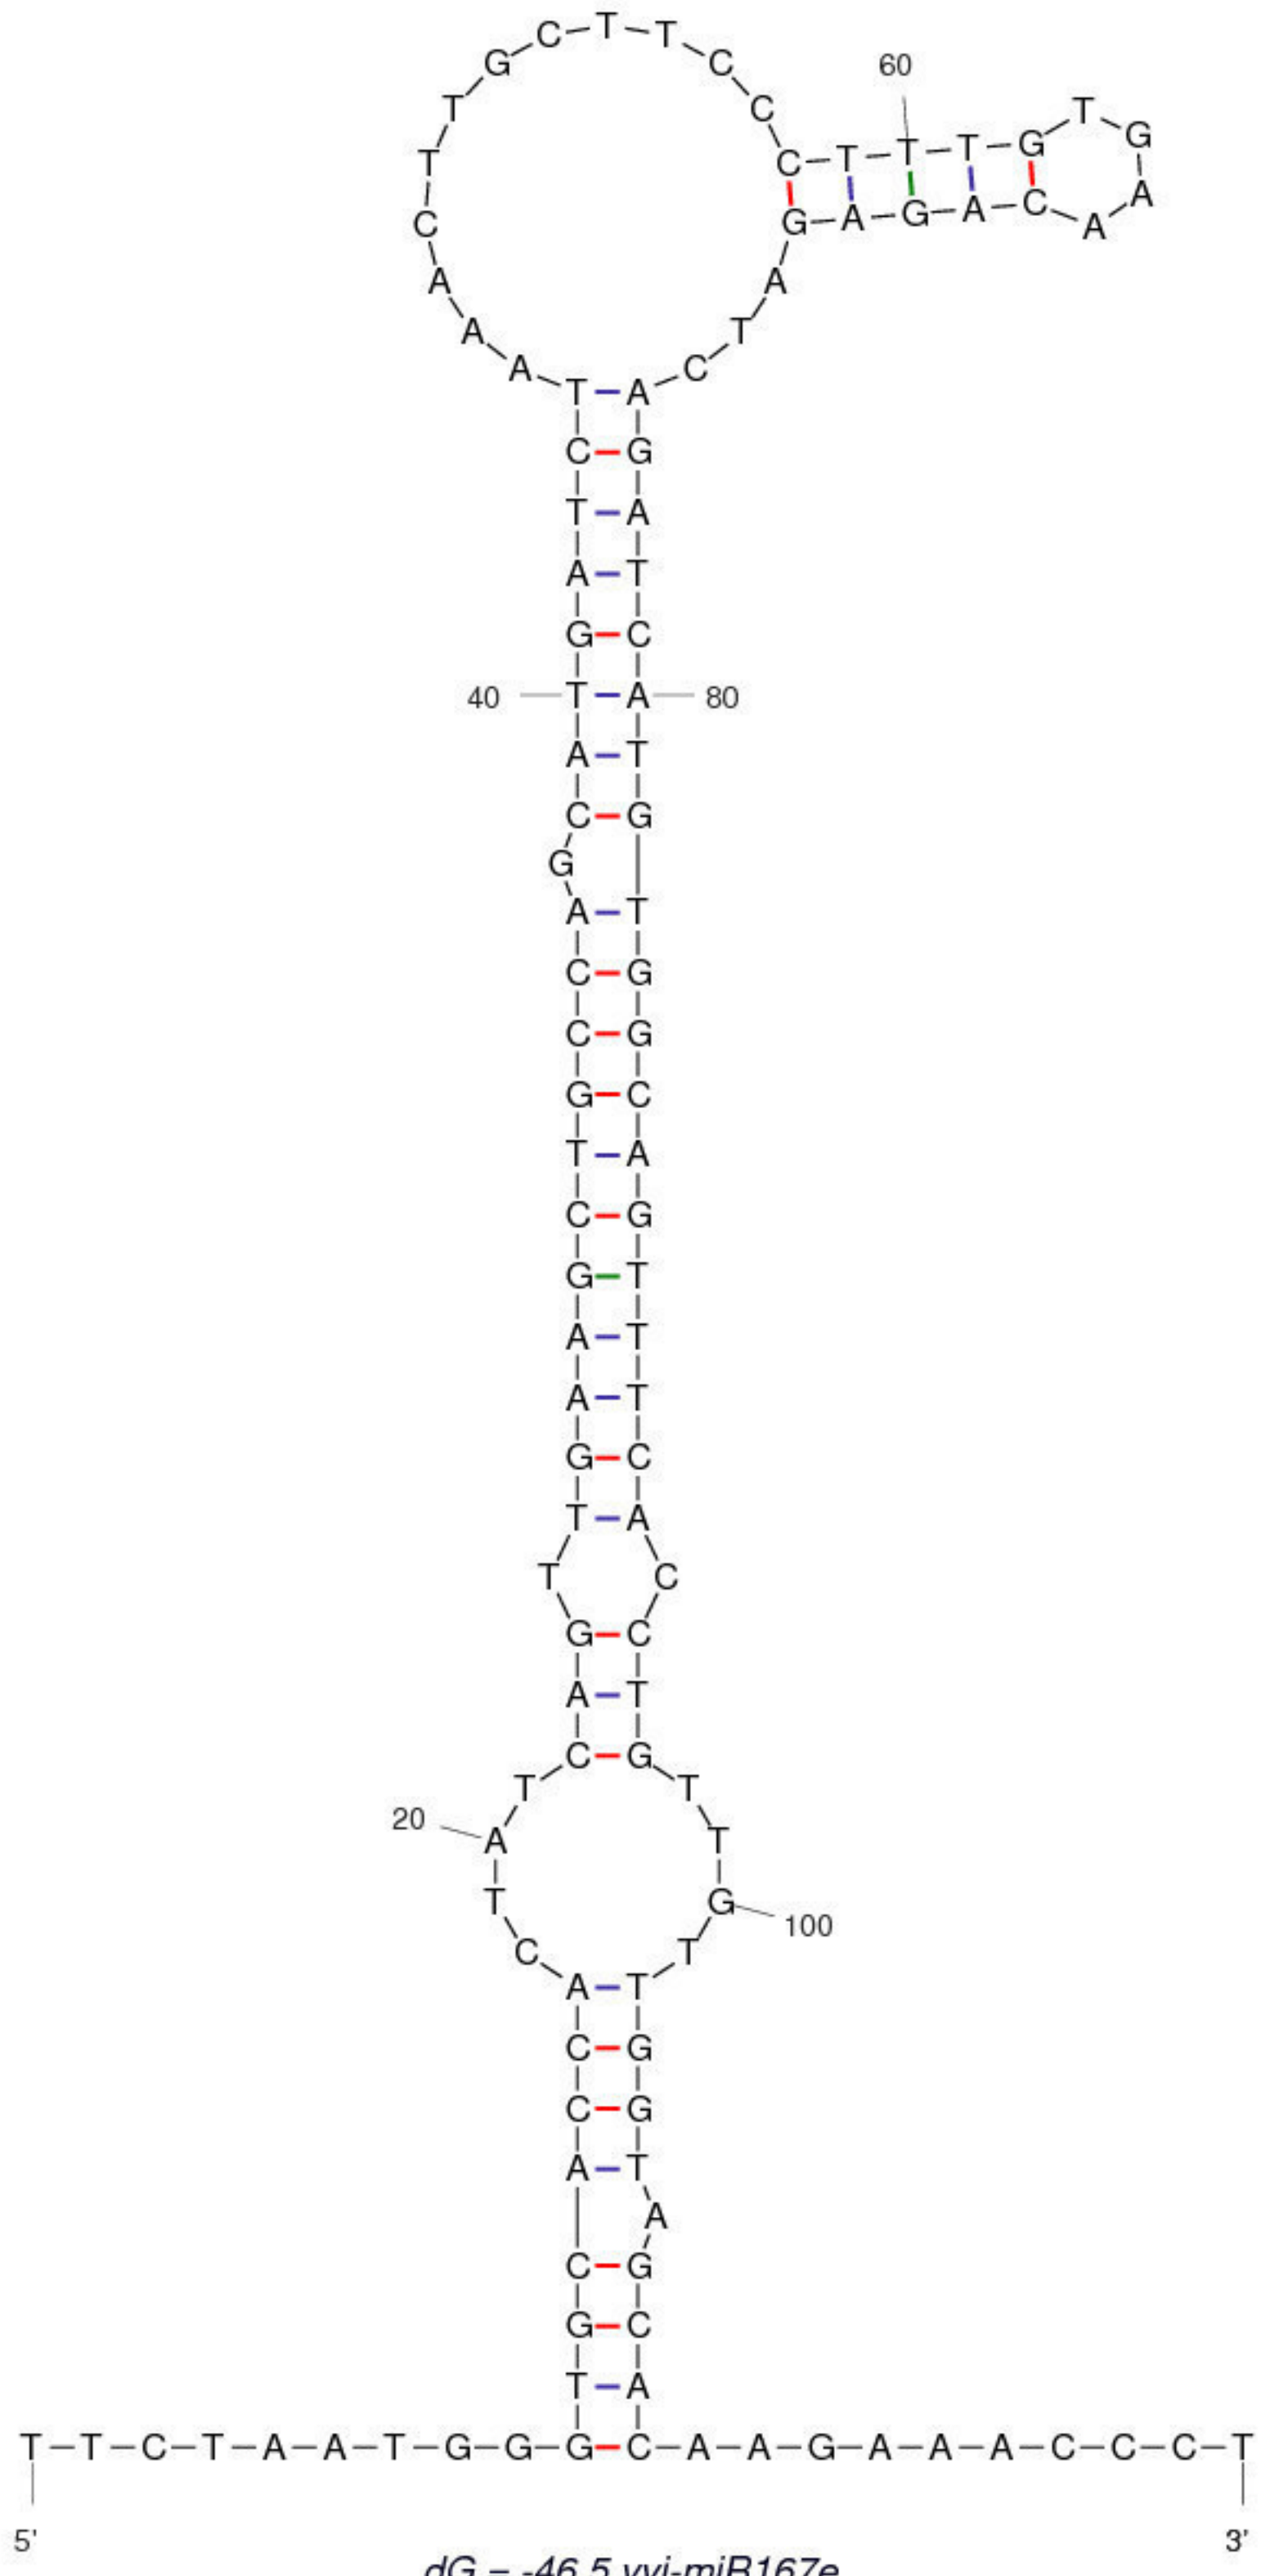

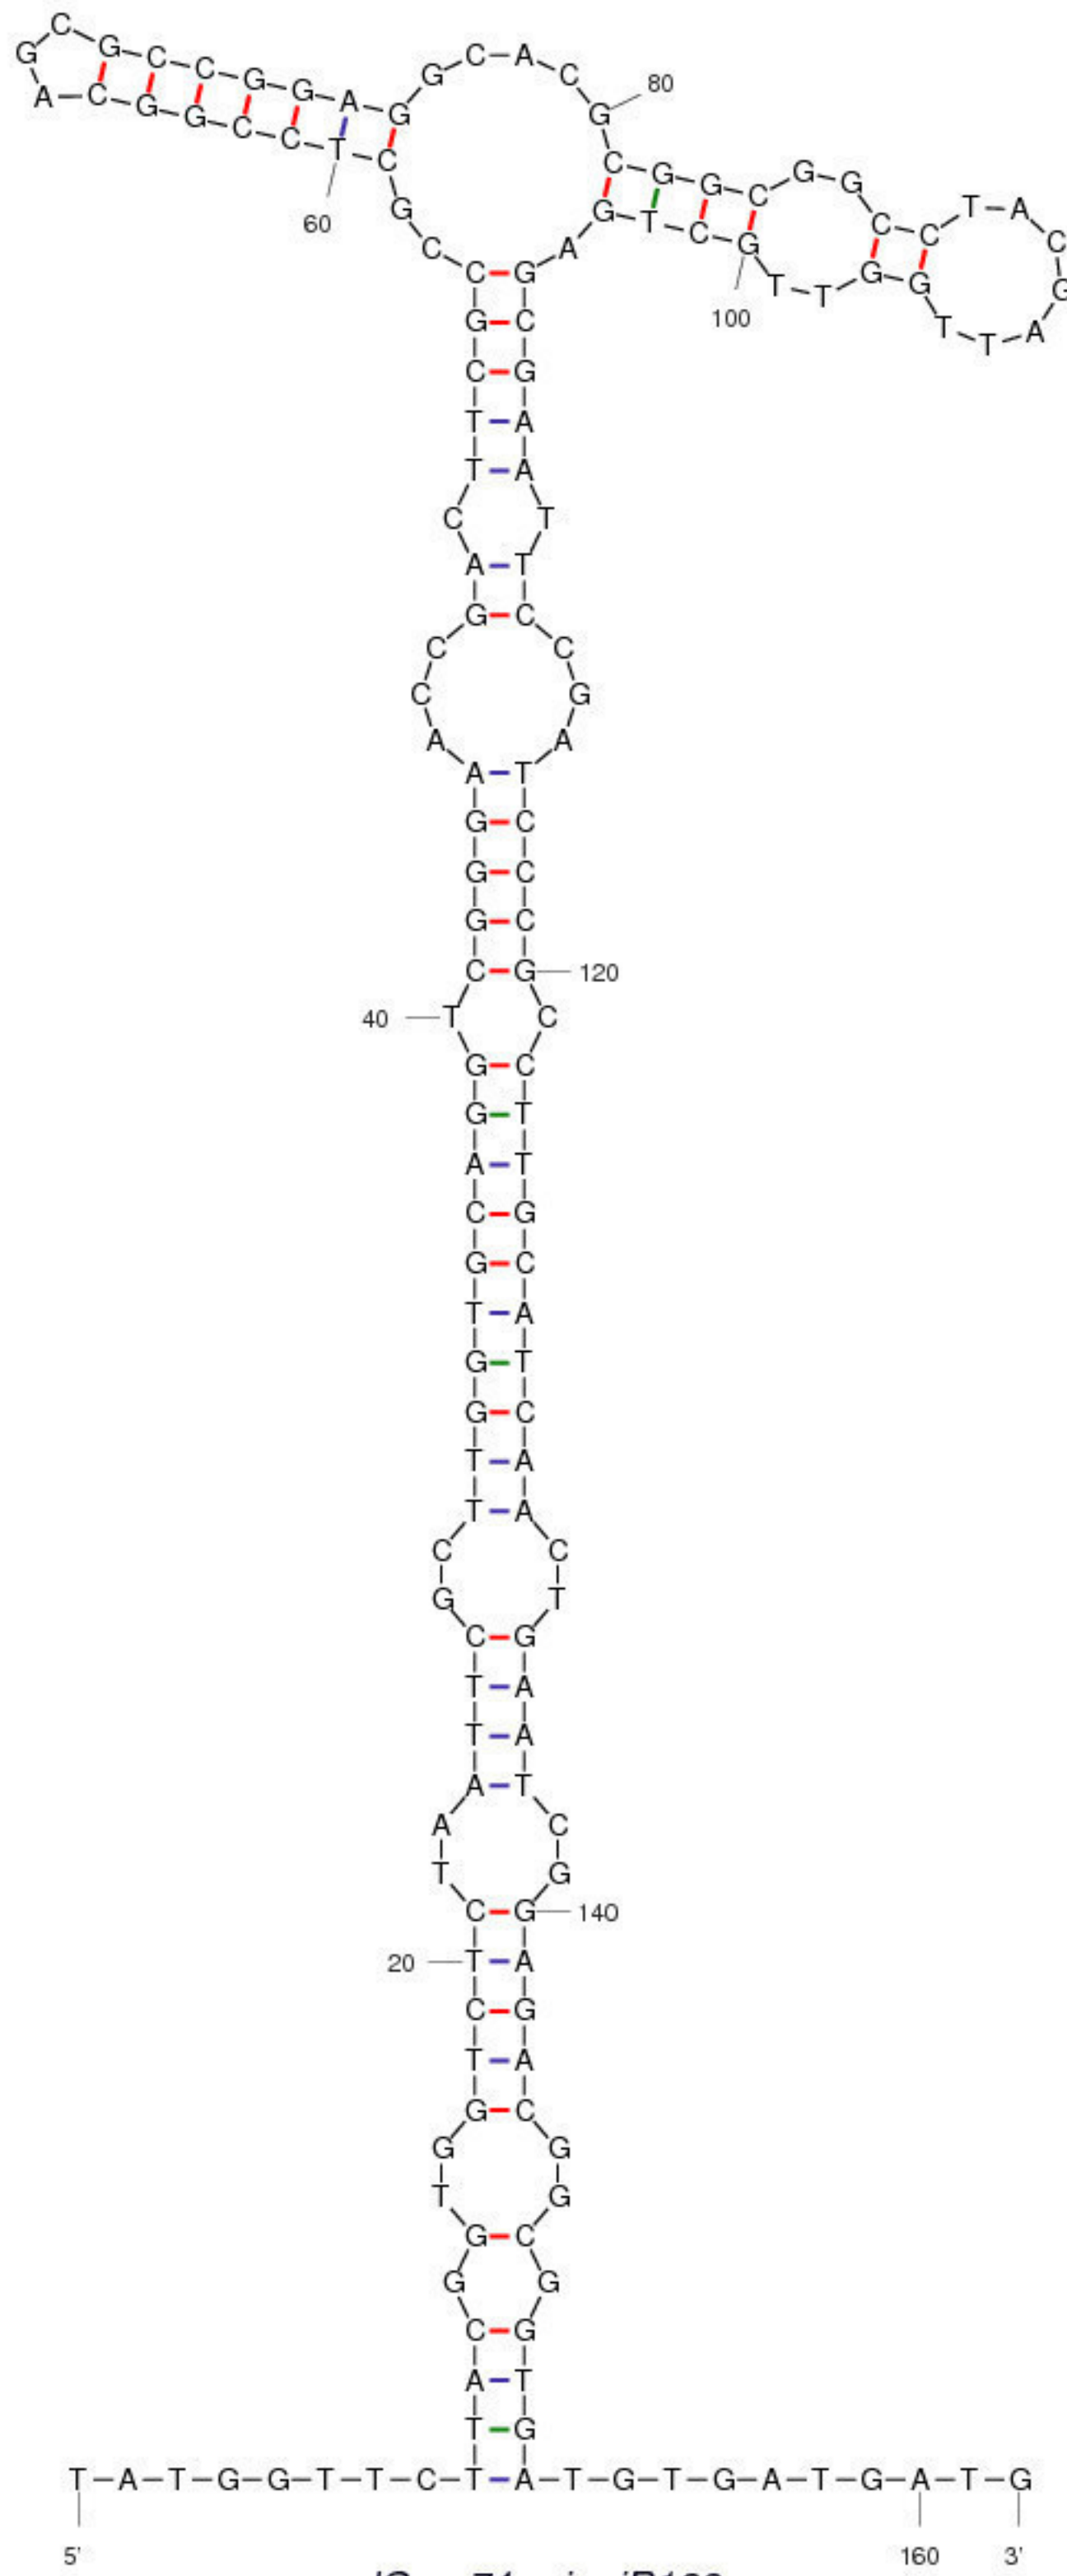

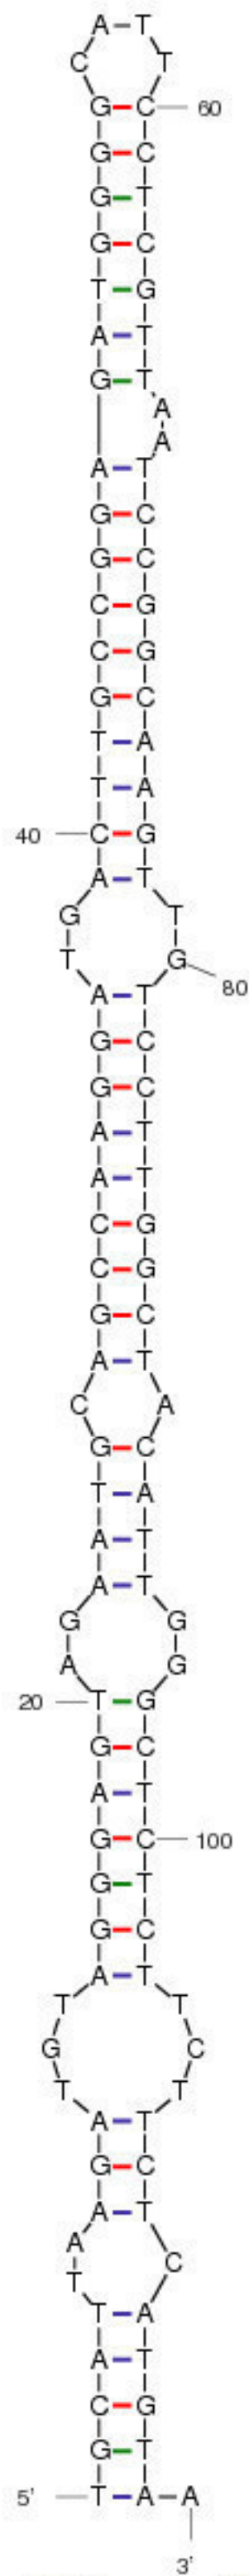

*dG = -66.4 vvi-miR169c*

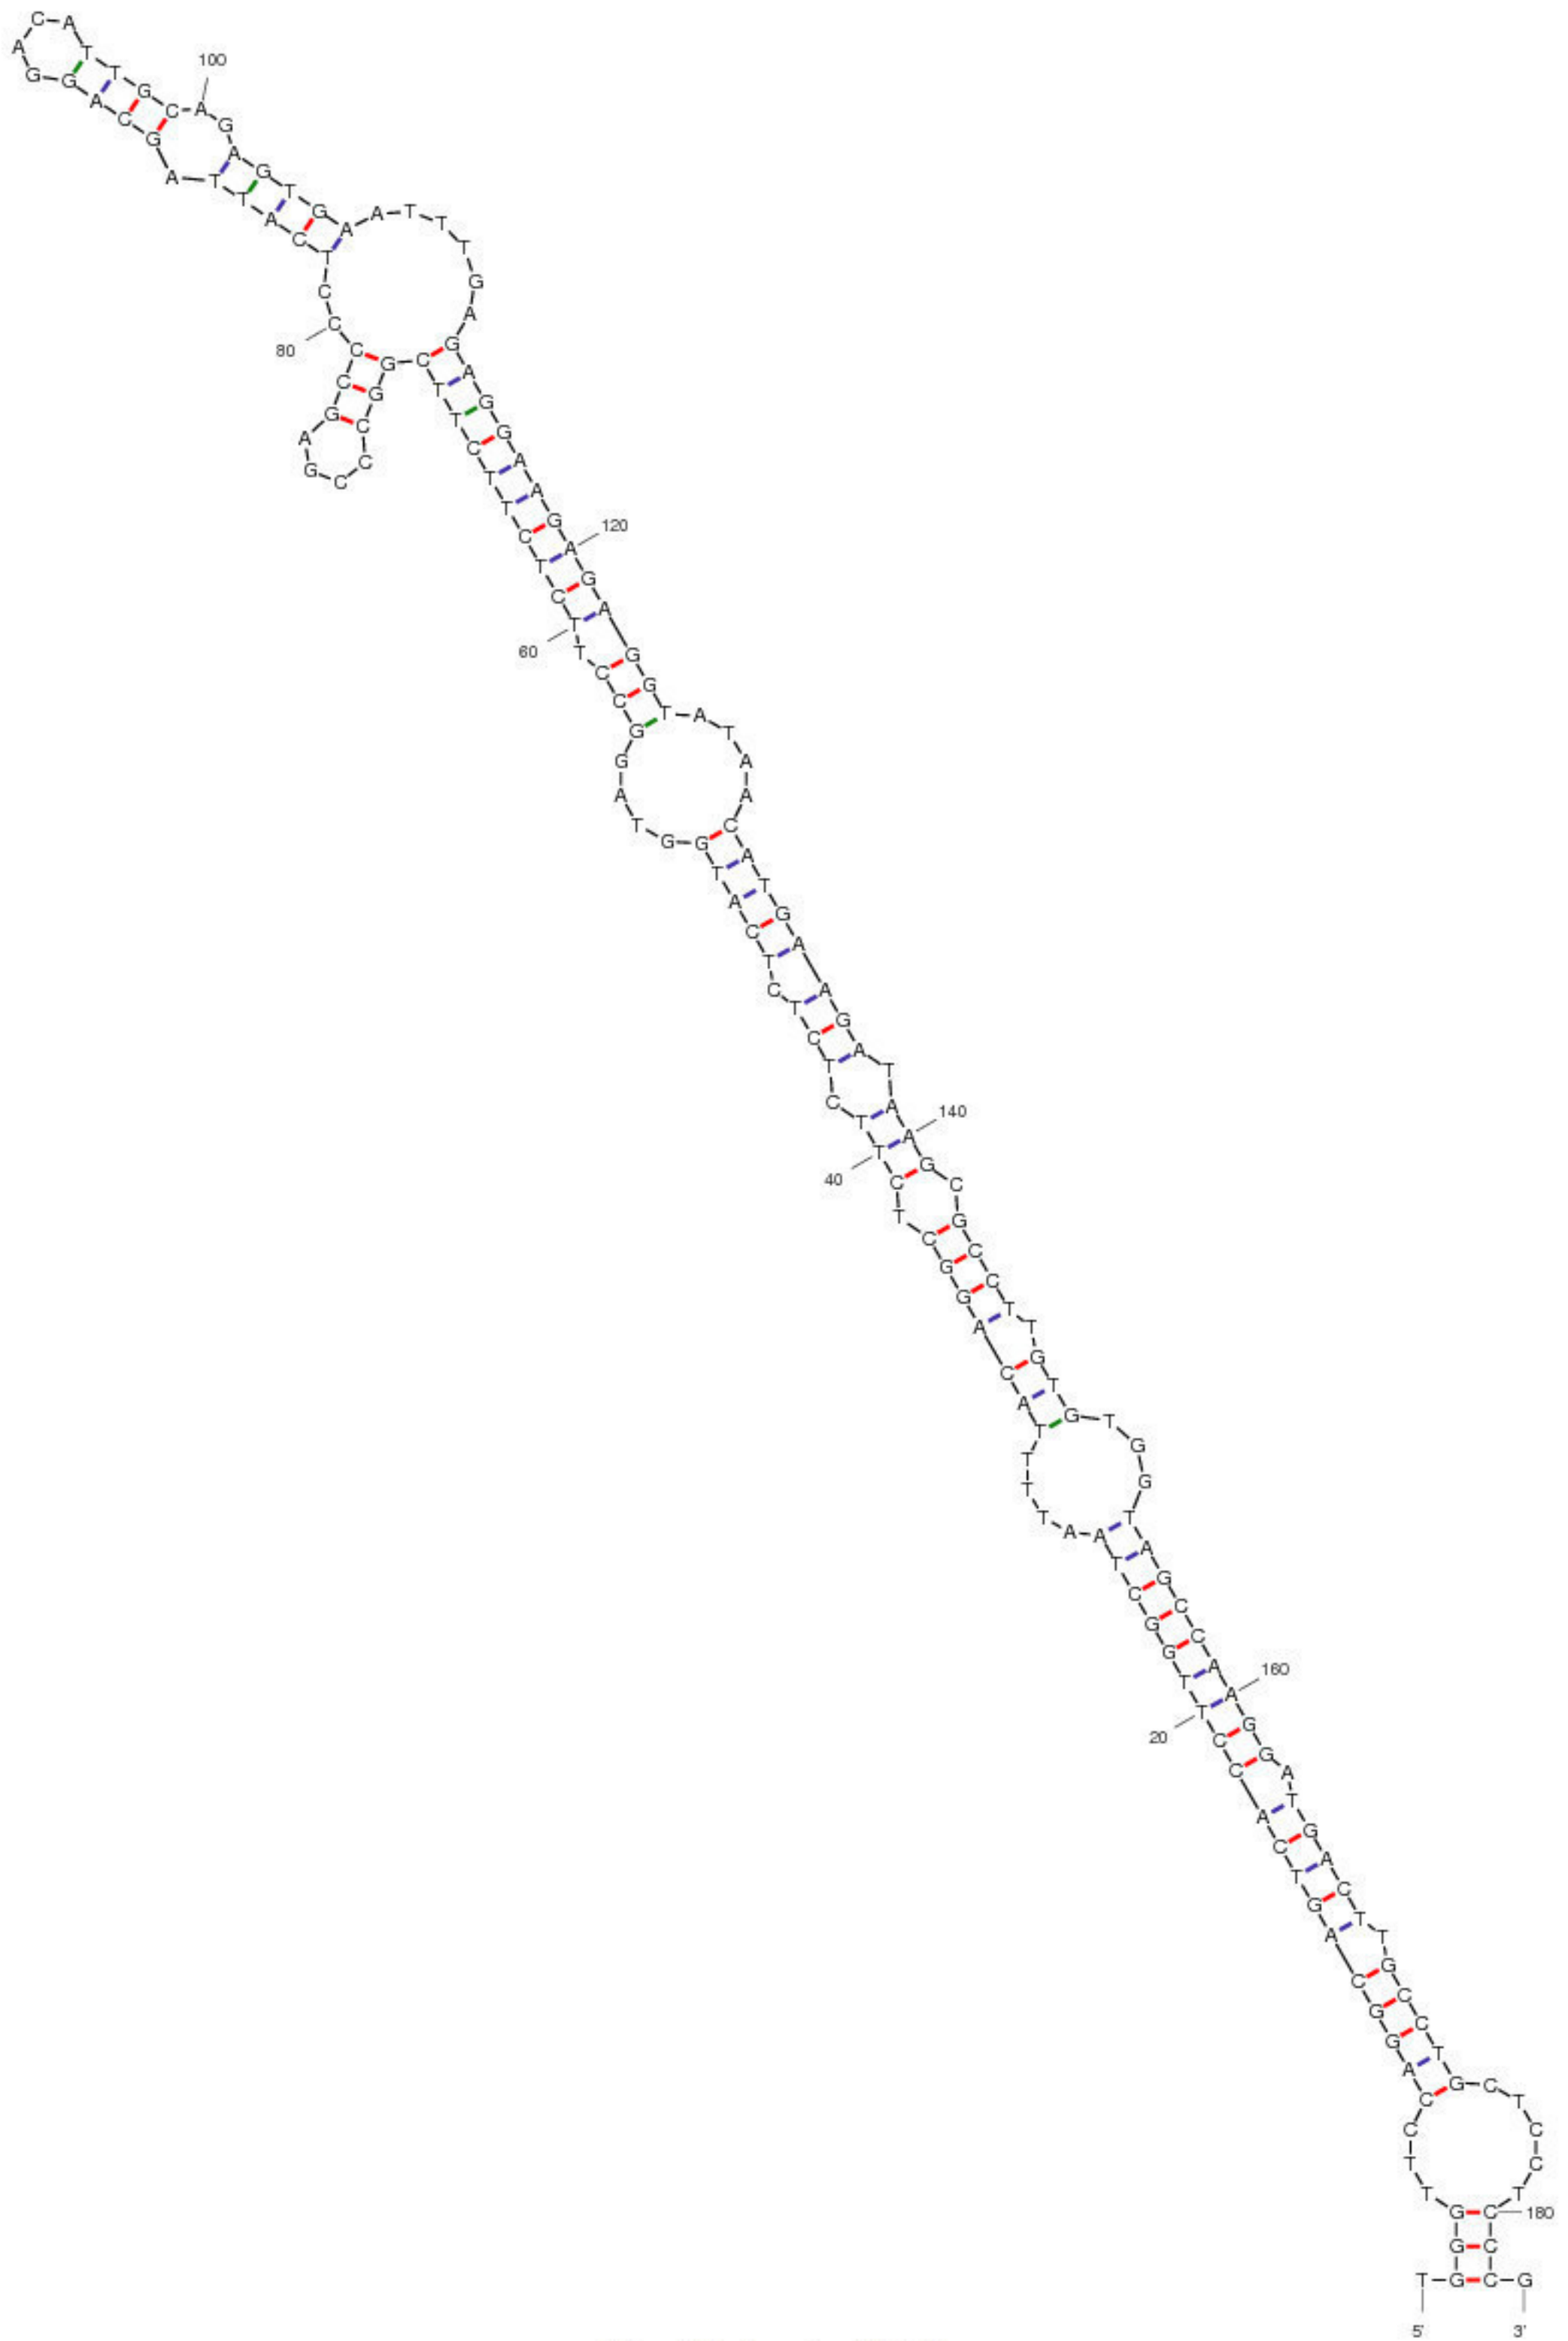

$dG = -84.4$  vvi-miR169e

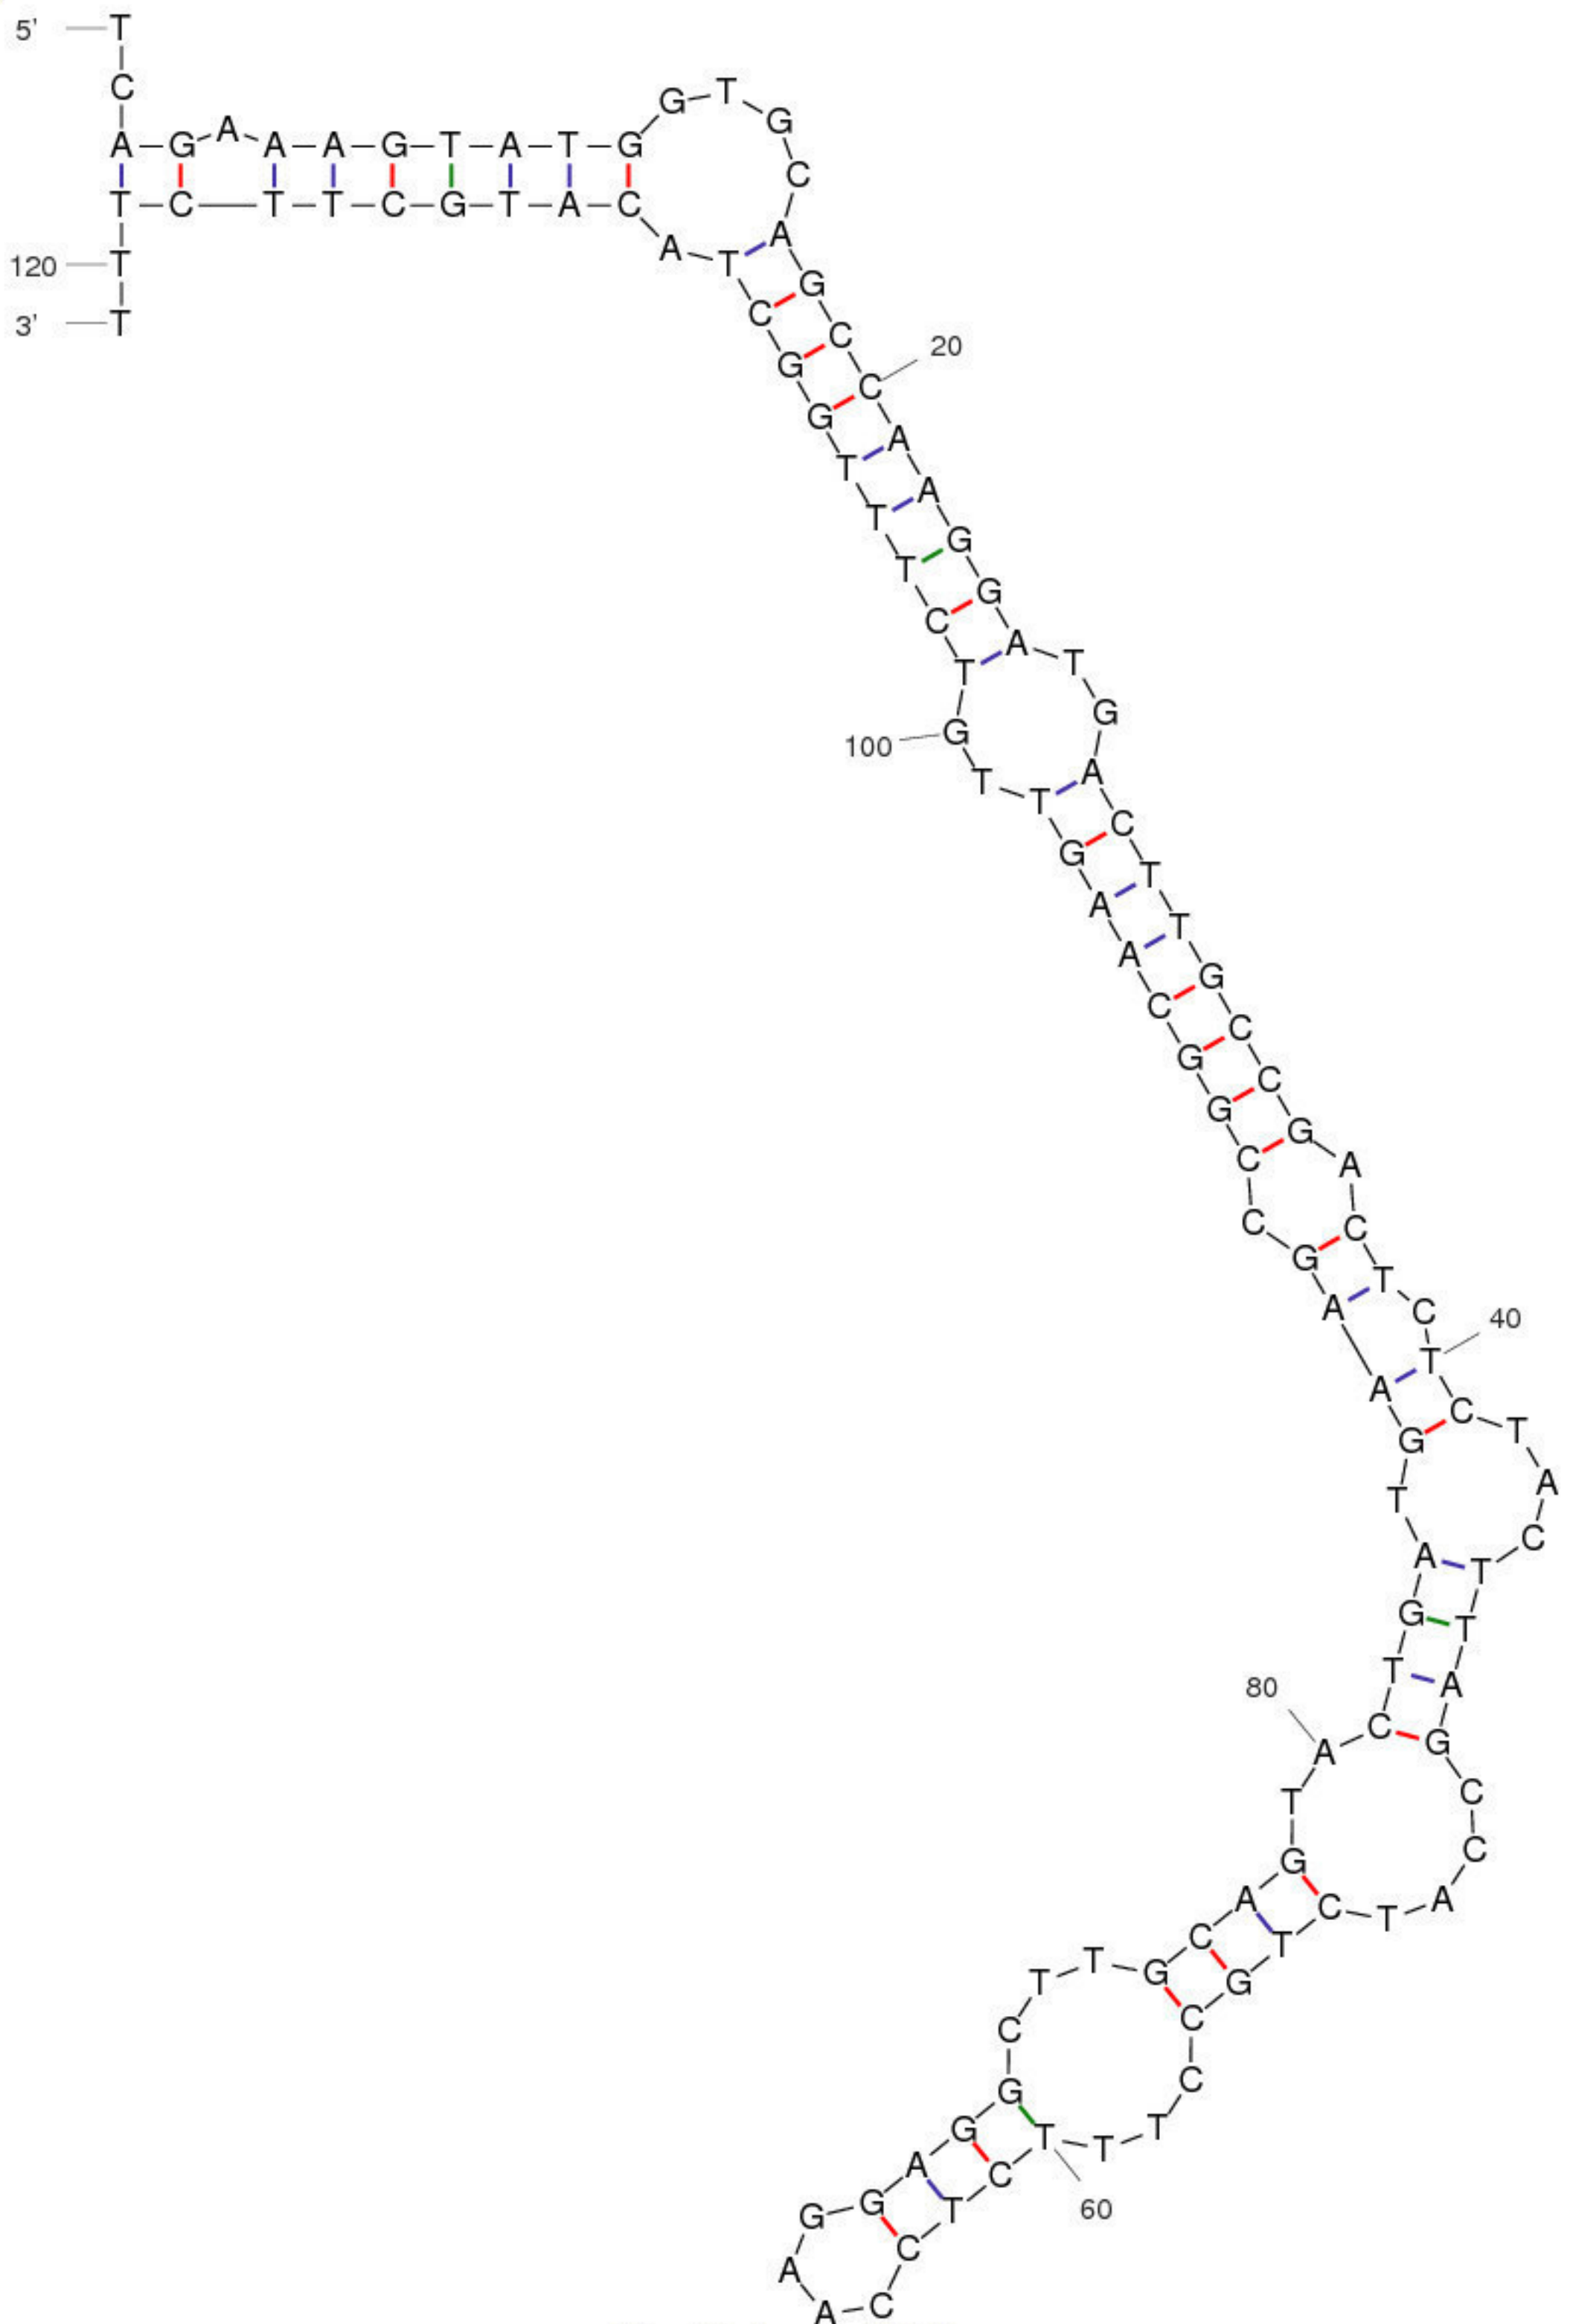

*dG = -50.4 vvi-miR169g*



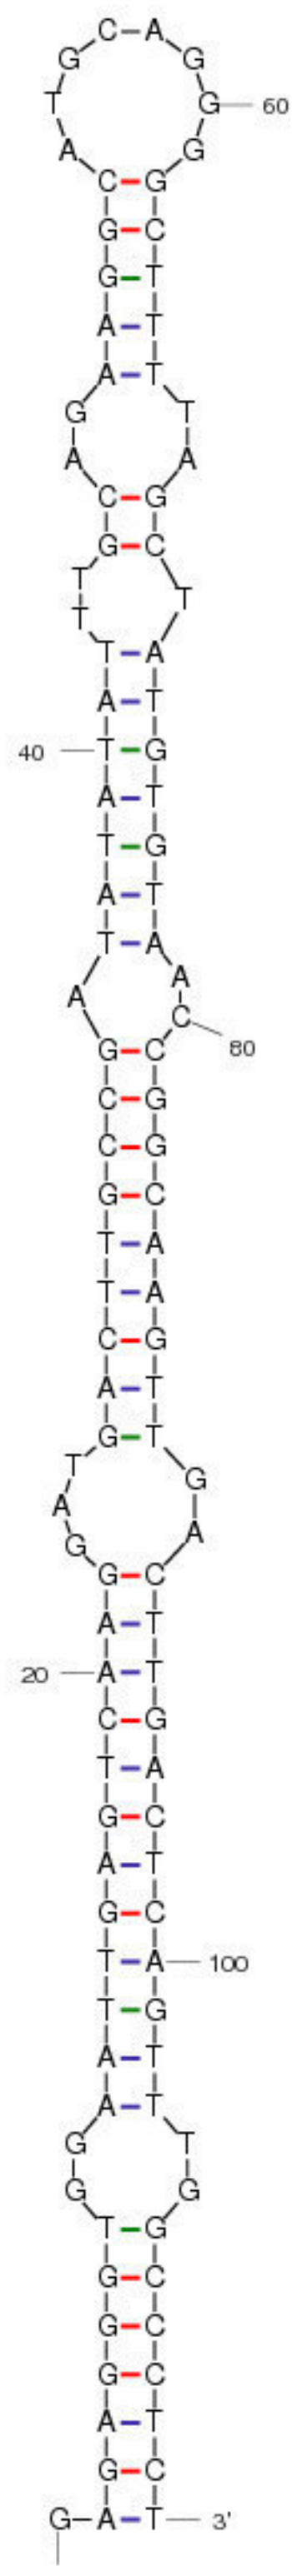

dG = -58.5 vvi-miR169r

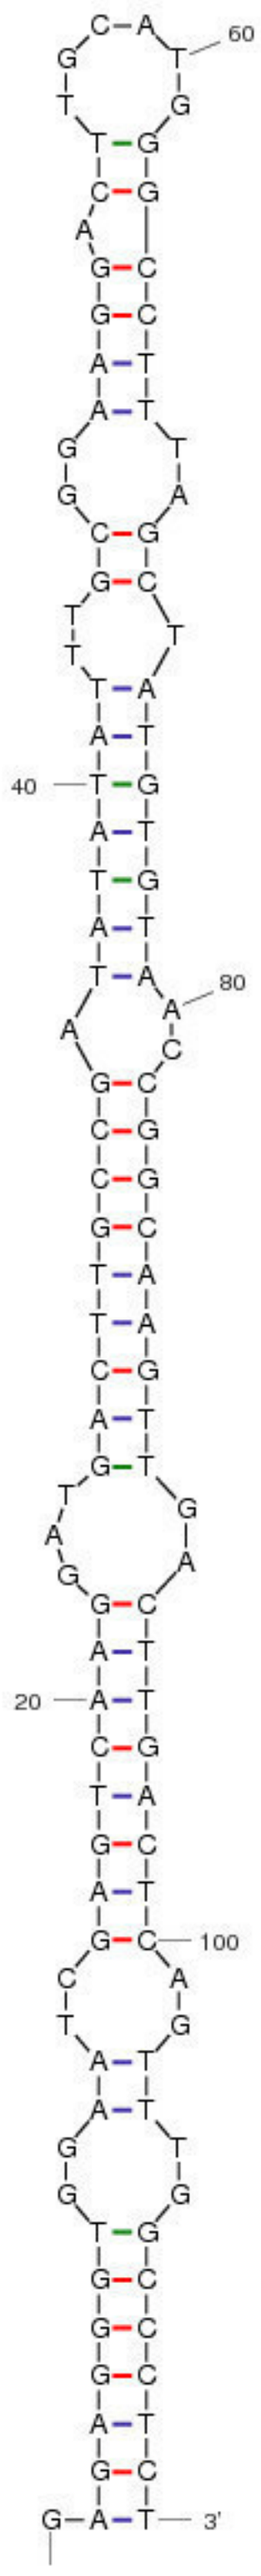

dG = -55 vvi-miR169t

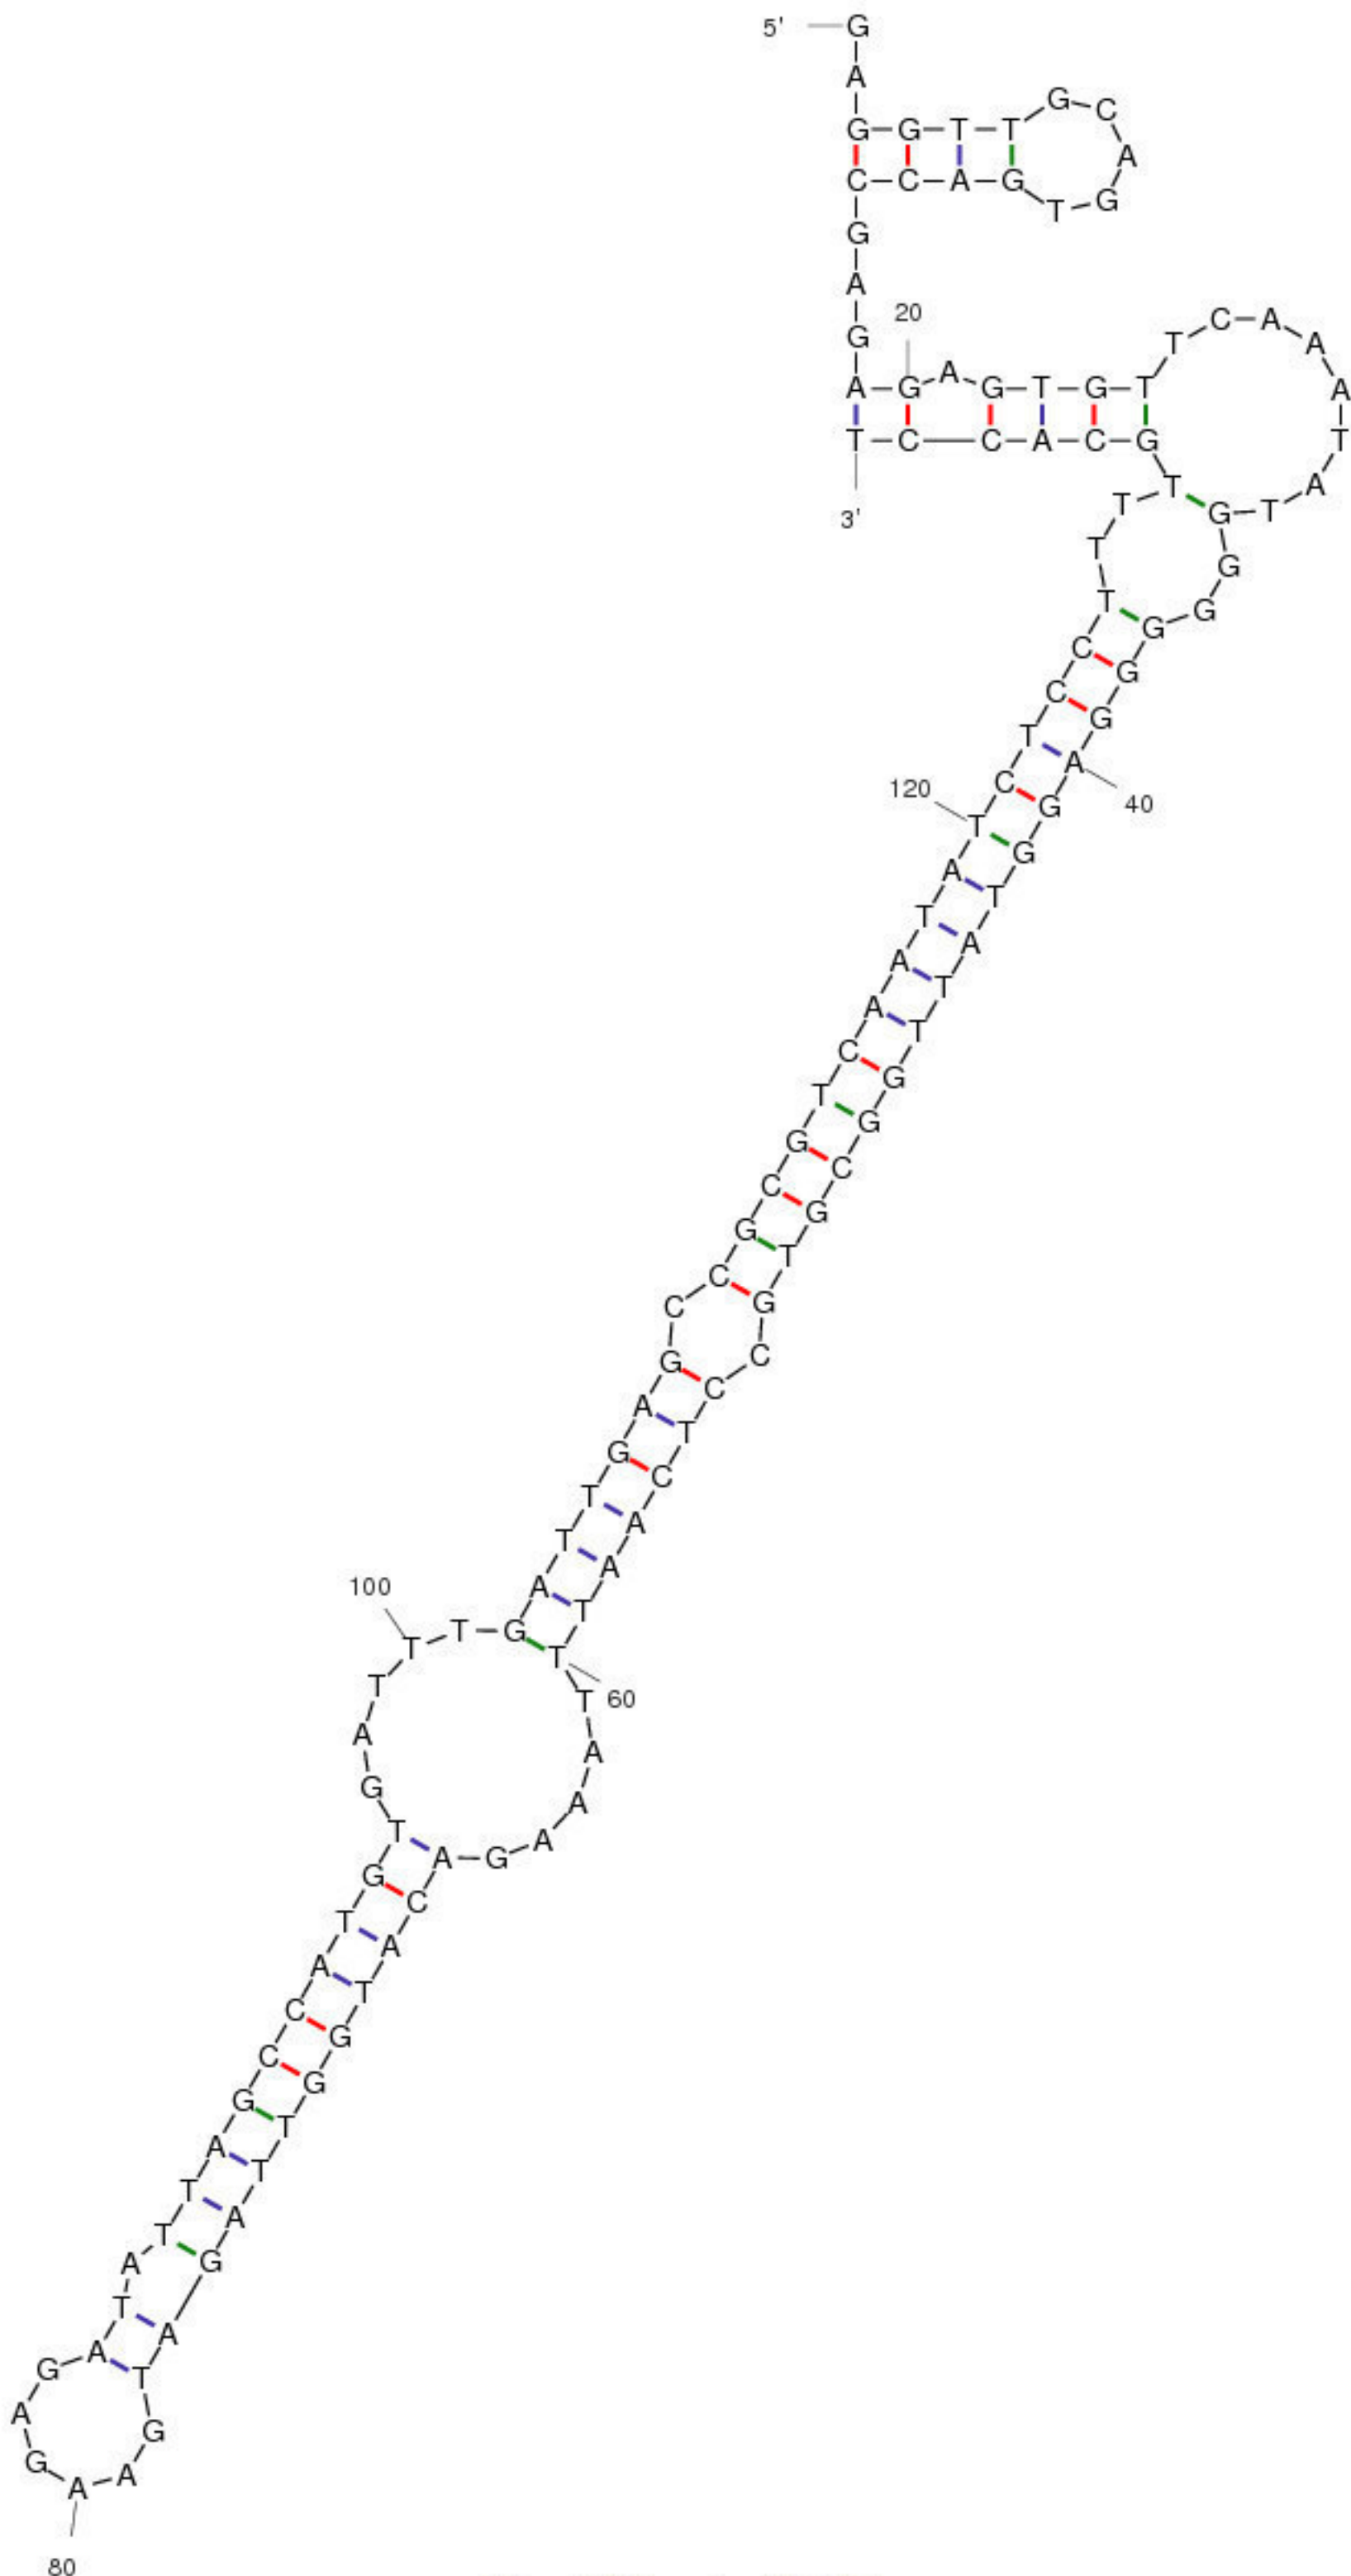

dG = -52.2 vvi-miR171b

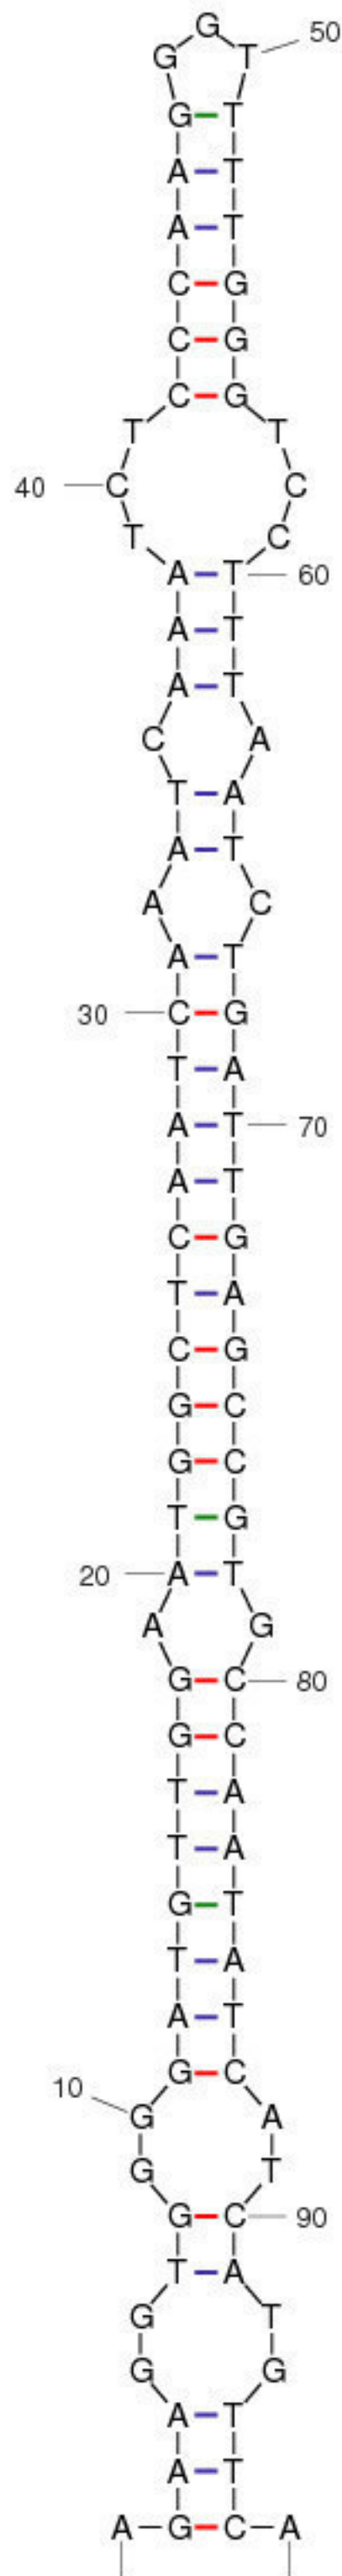

*dG = -42.2 vvi-miR171i*

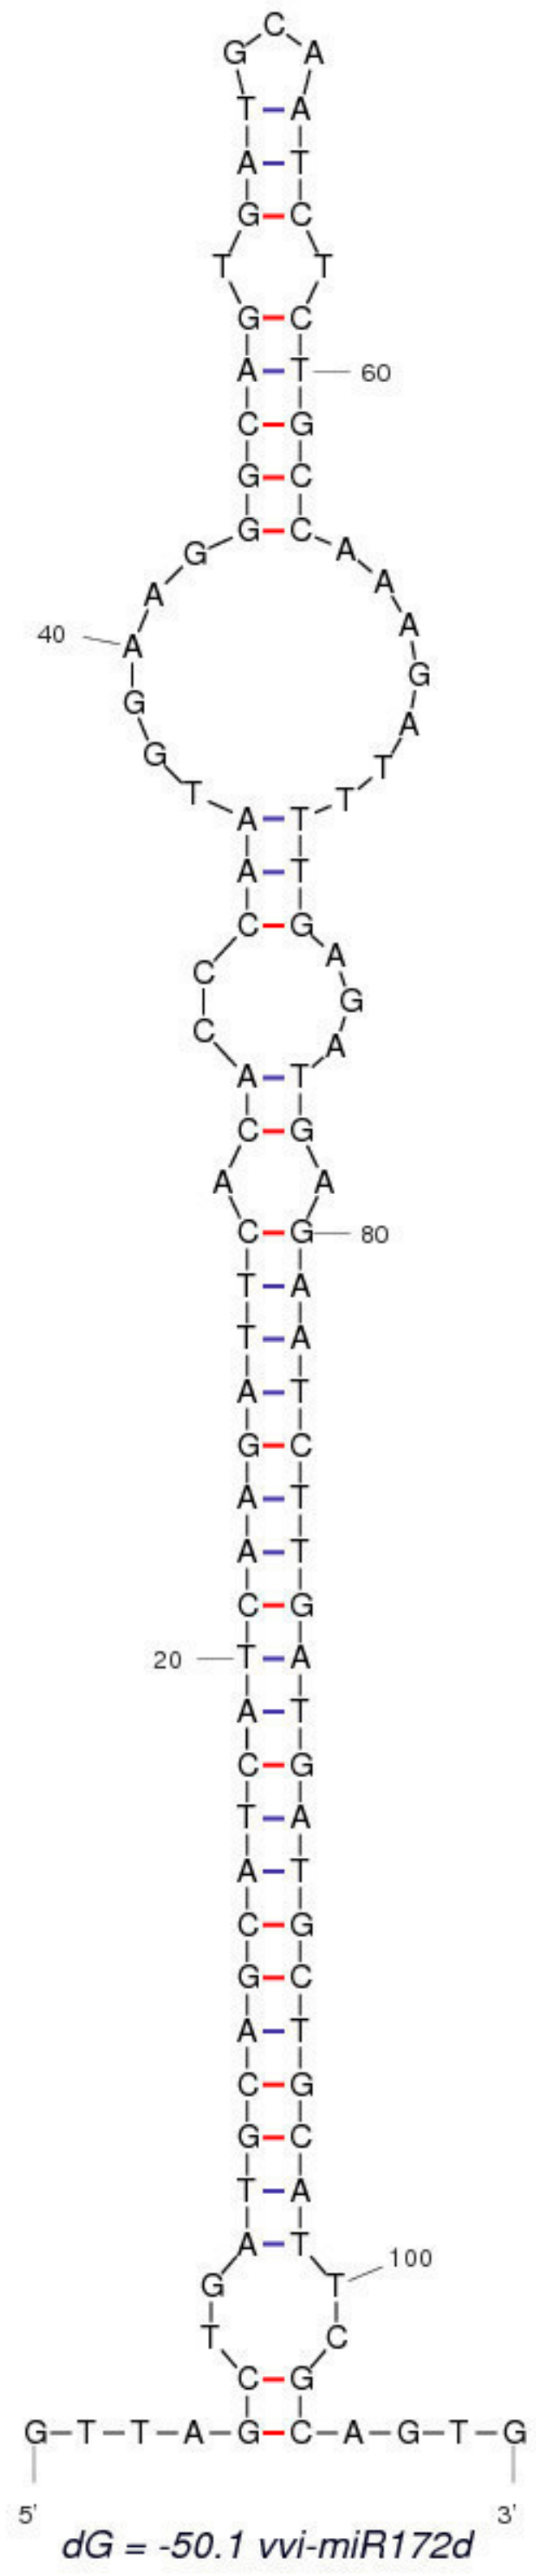

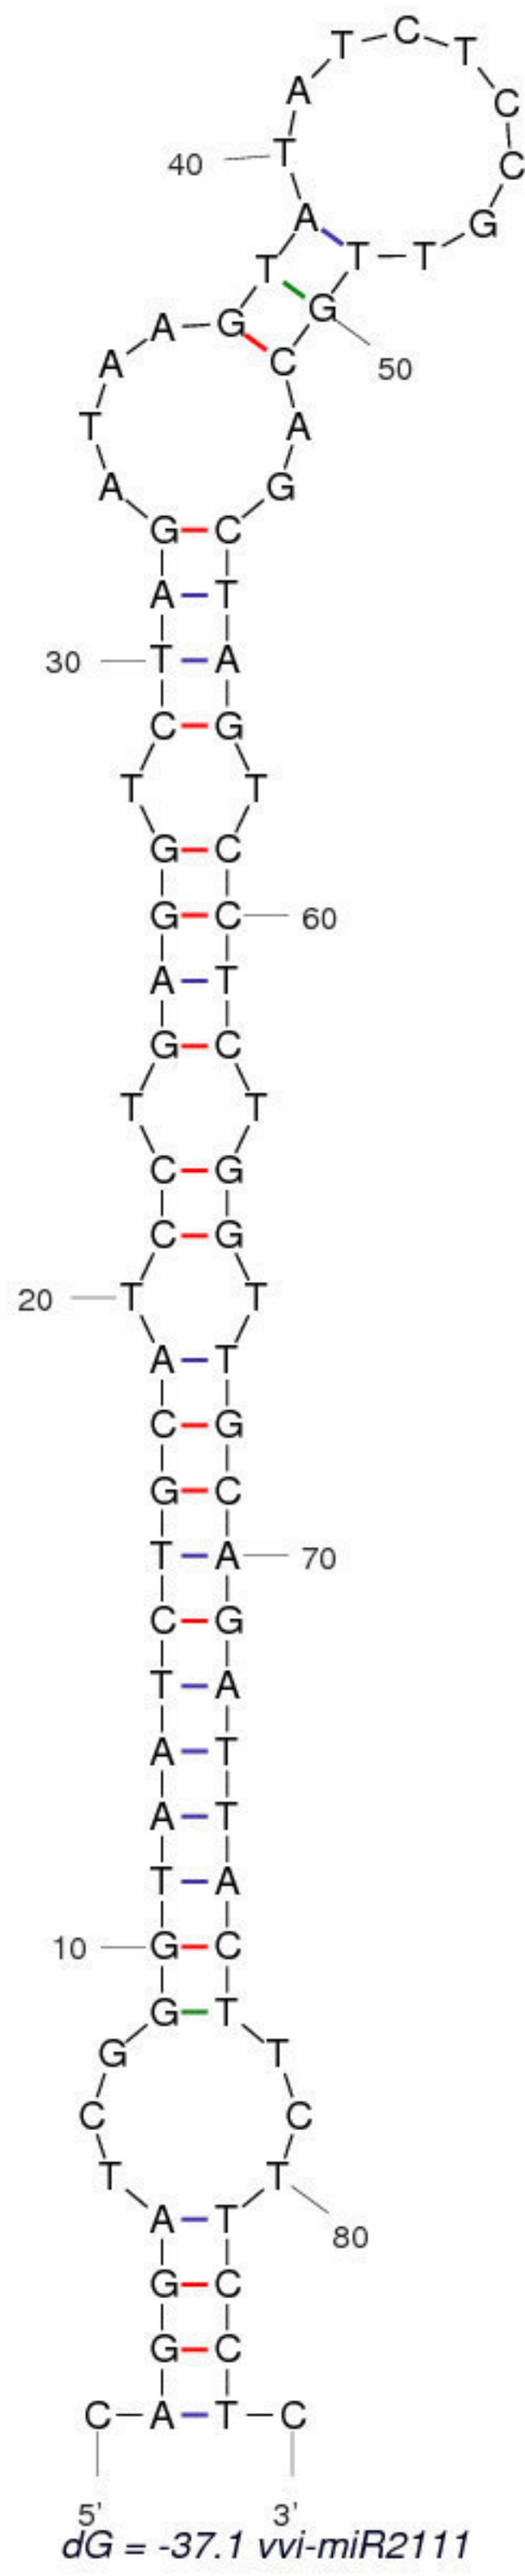

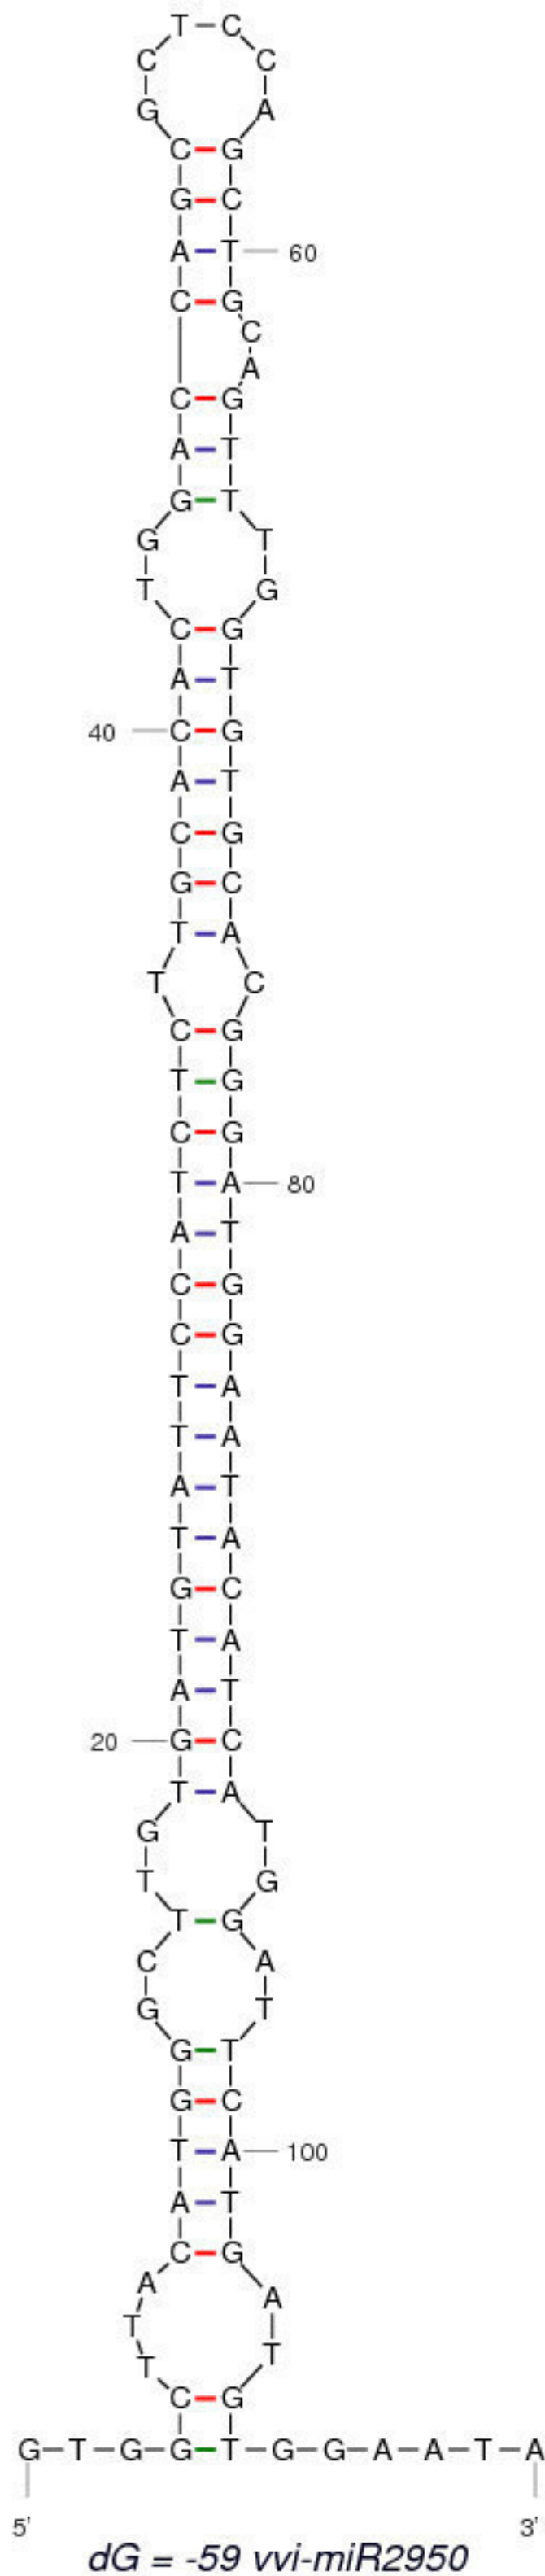

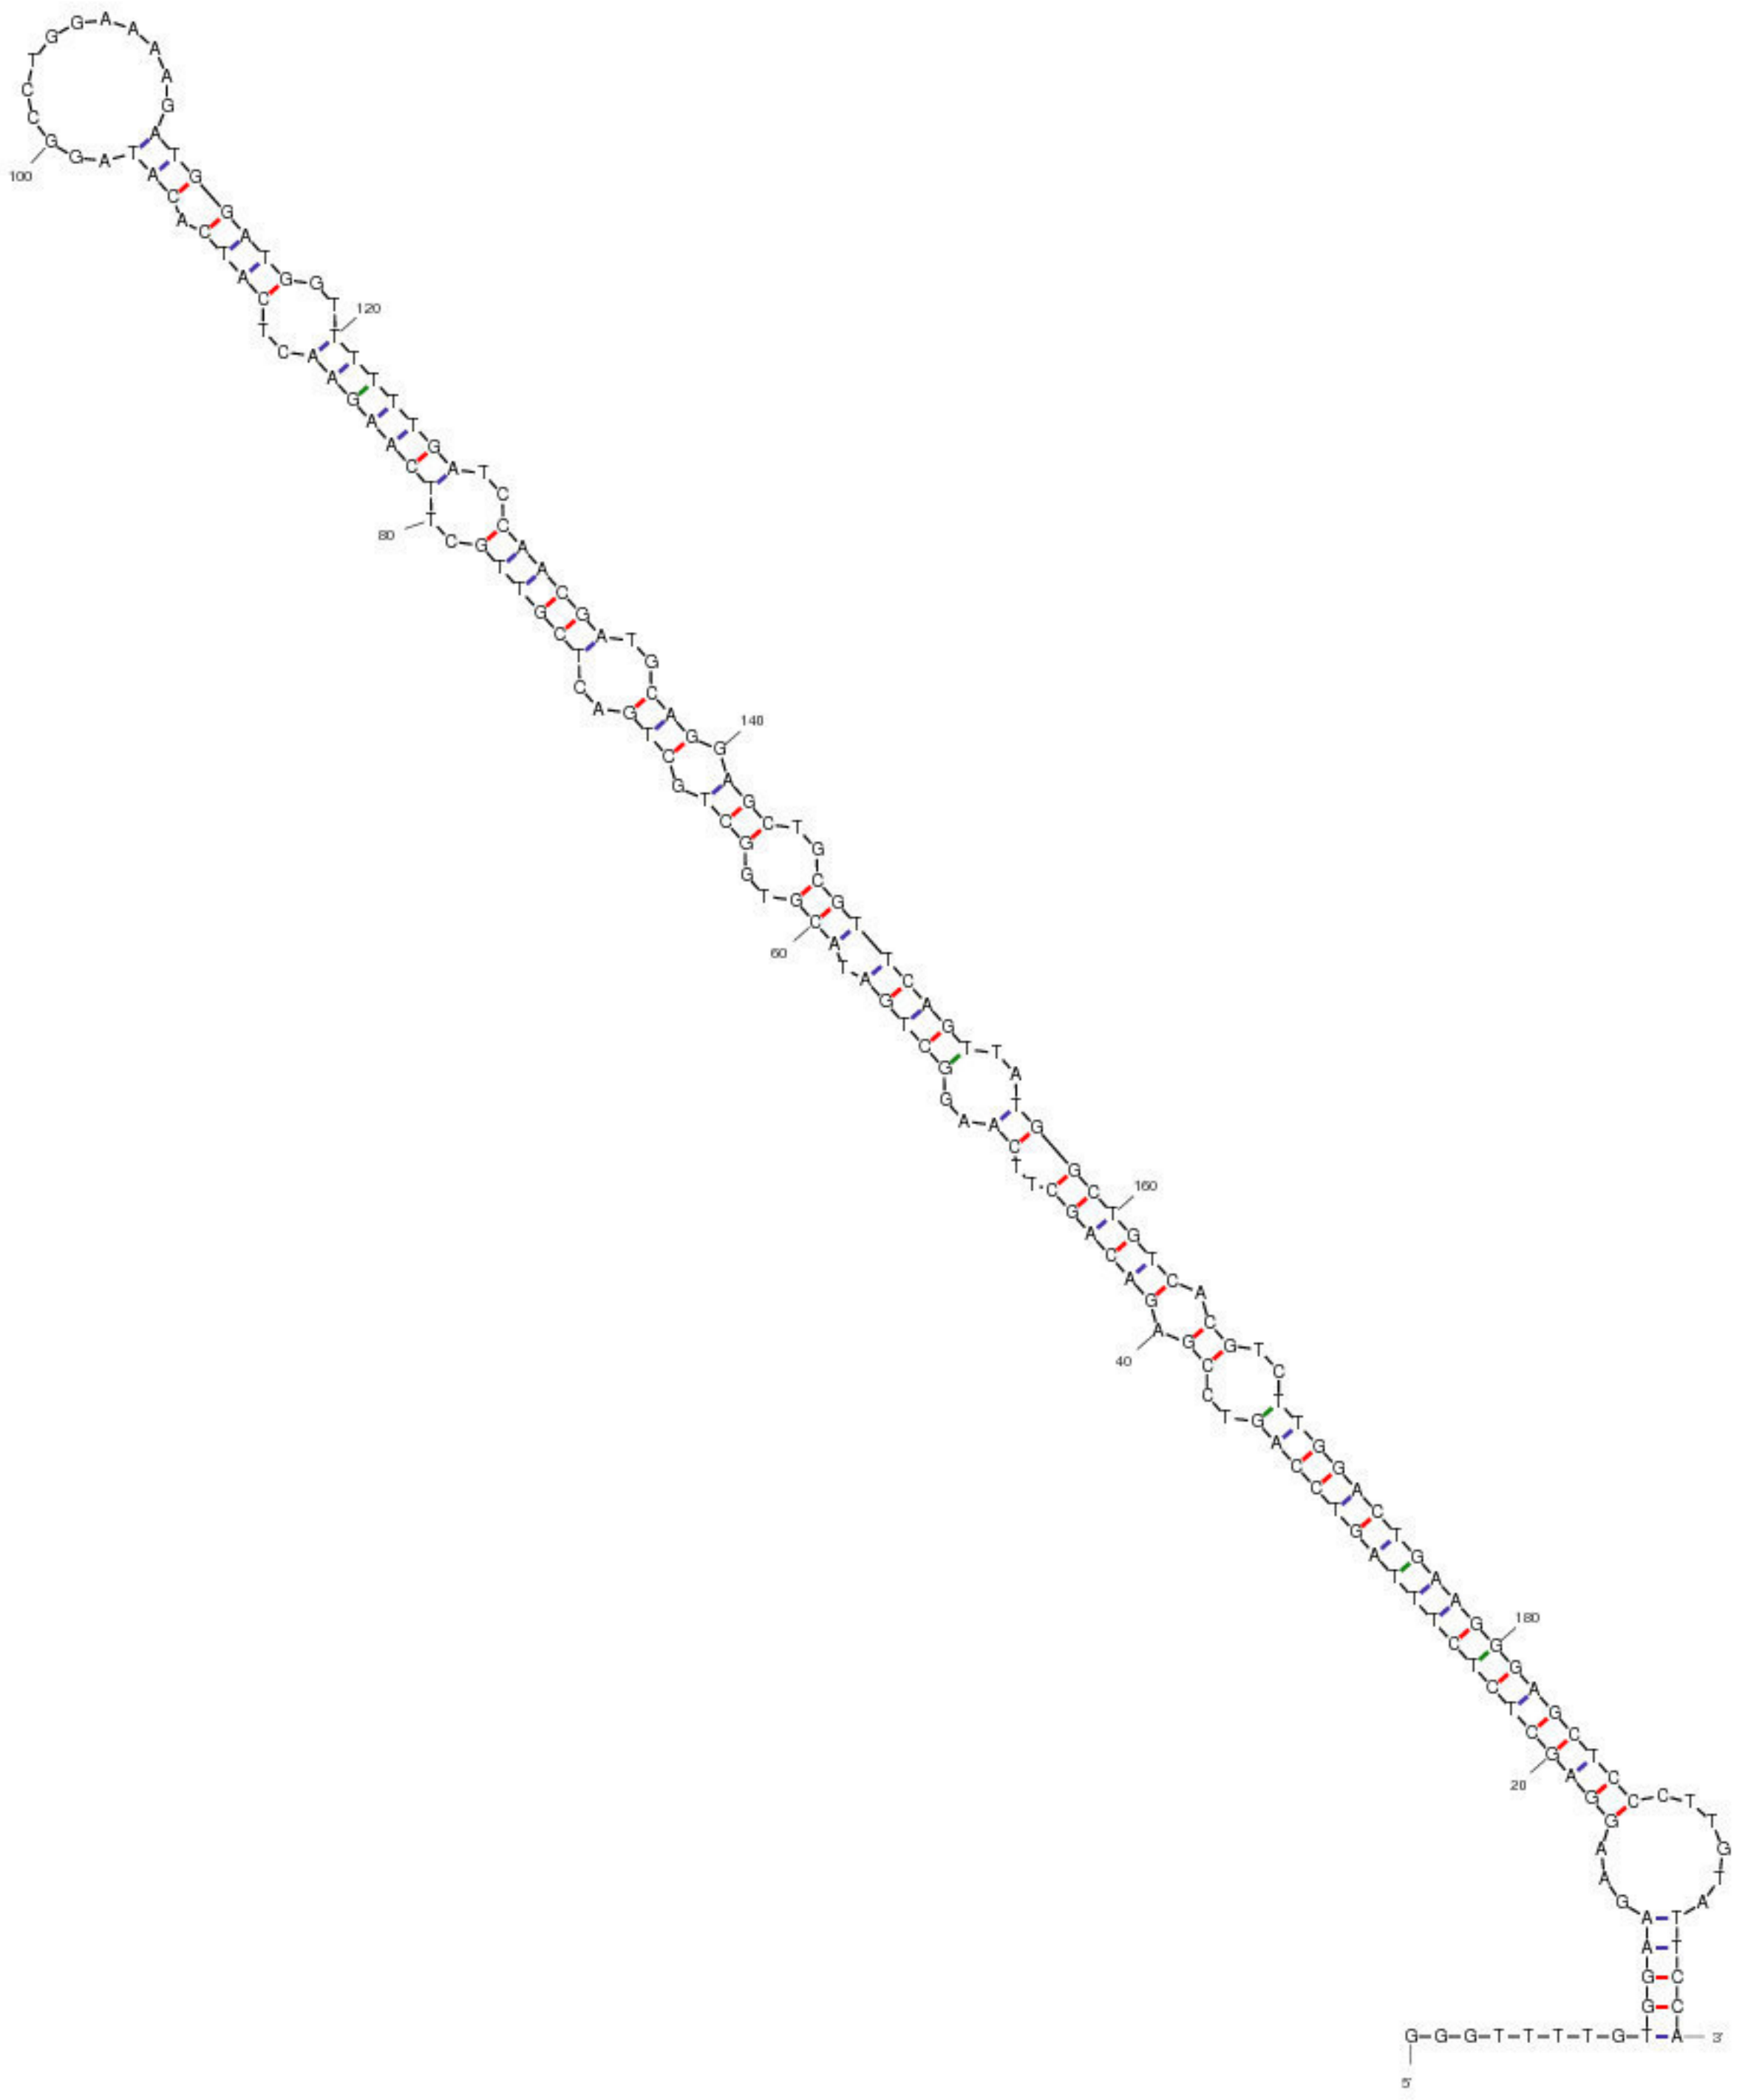

*dG = -98 vvi-miR319b*



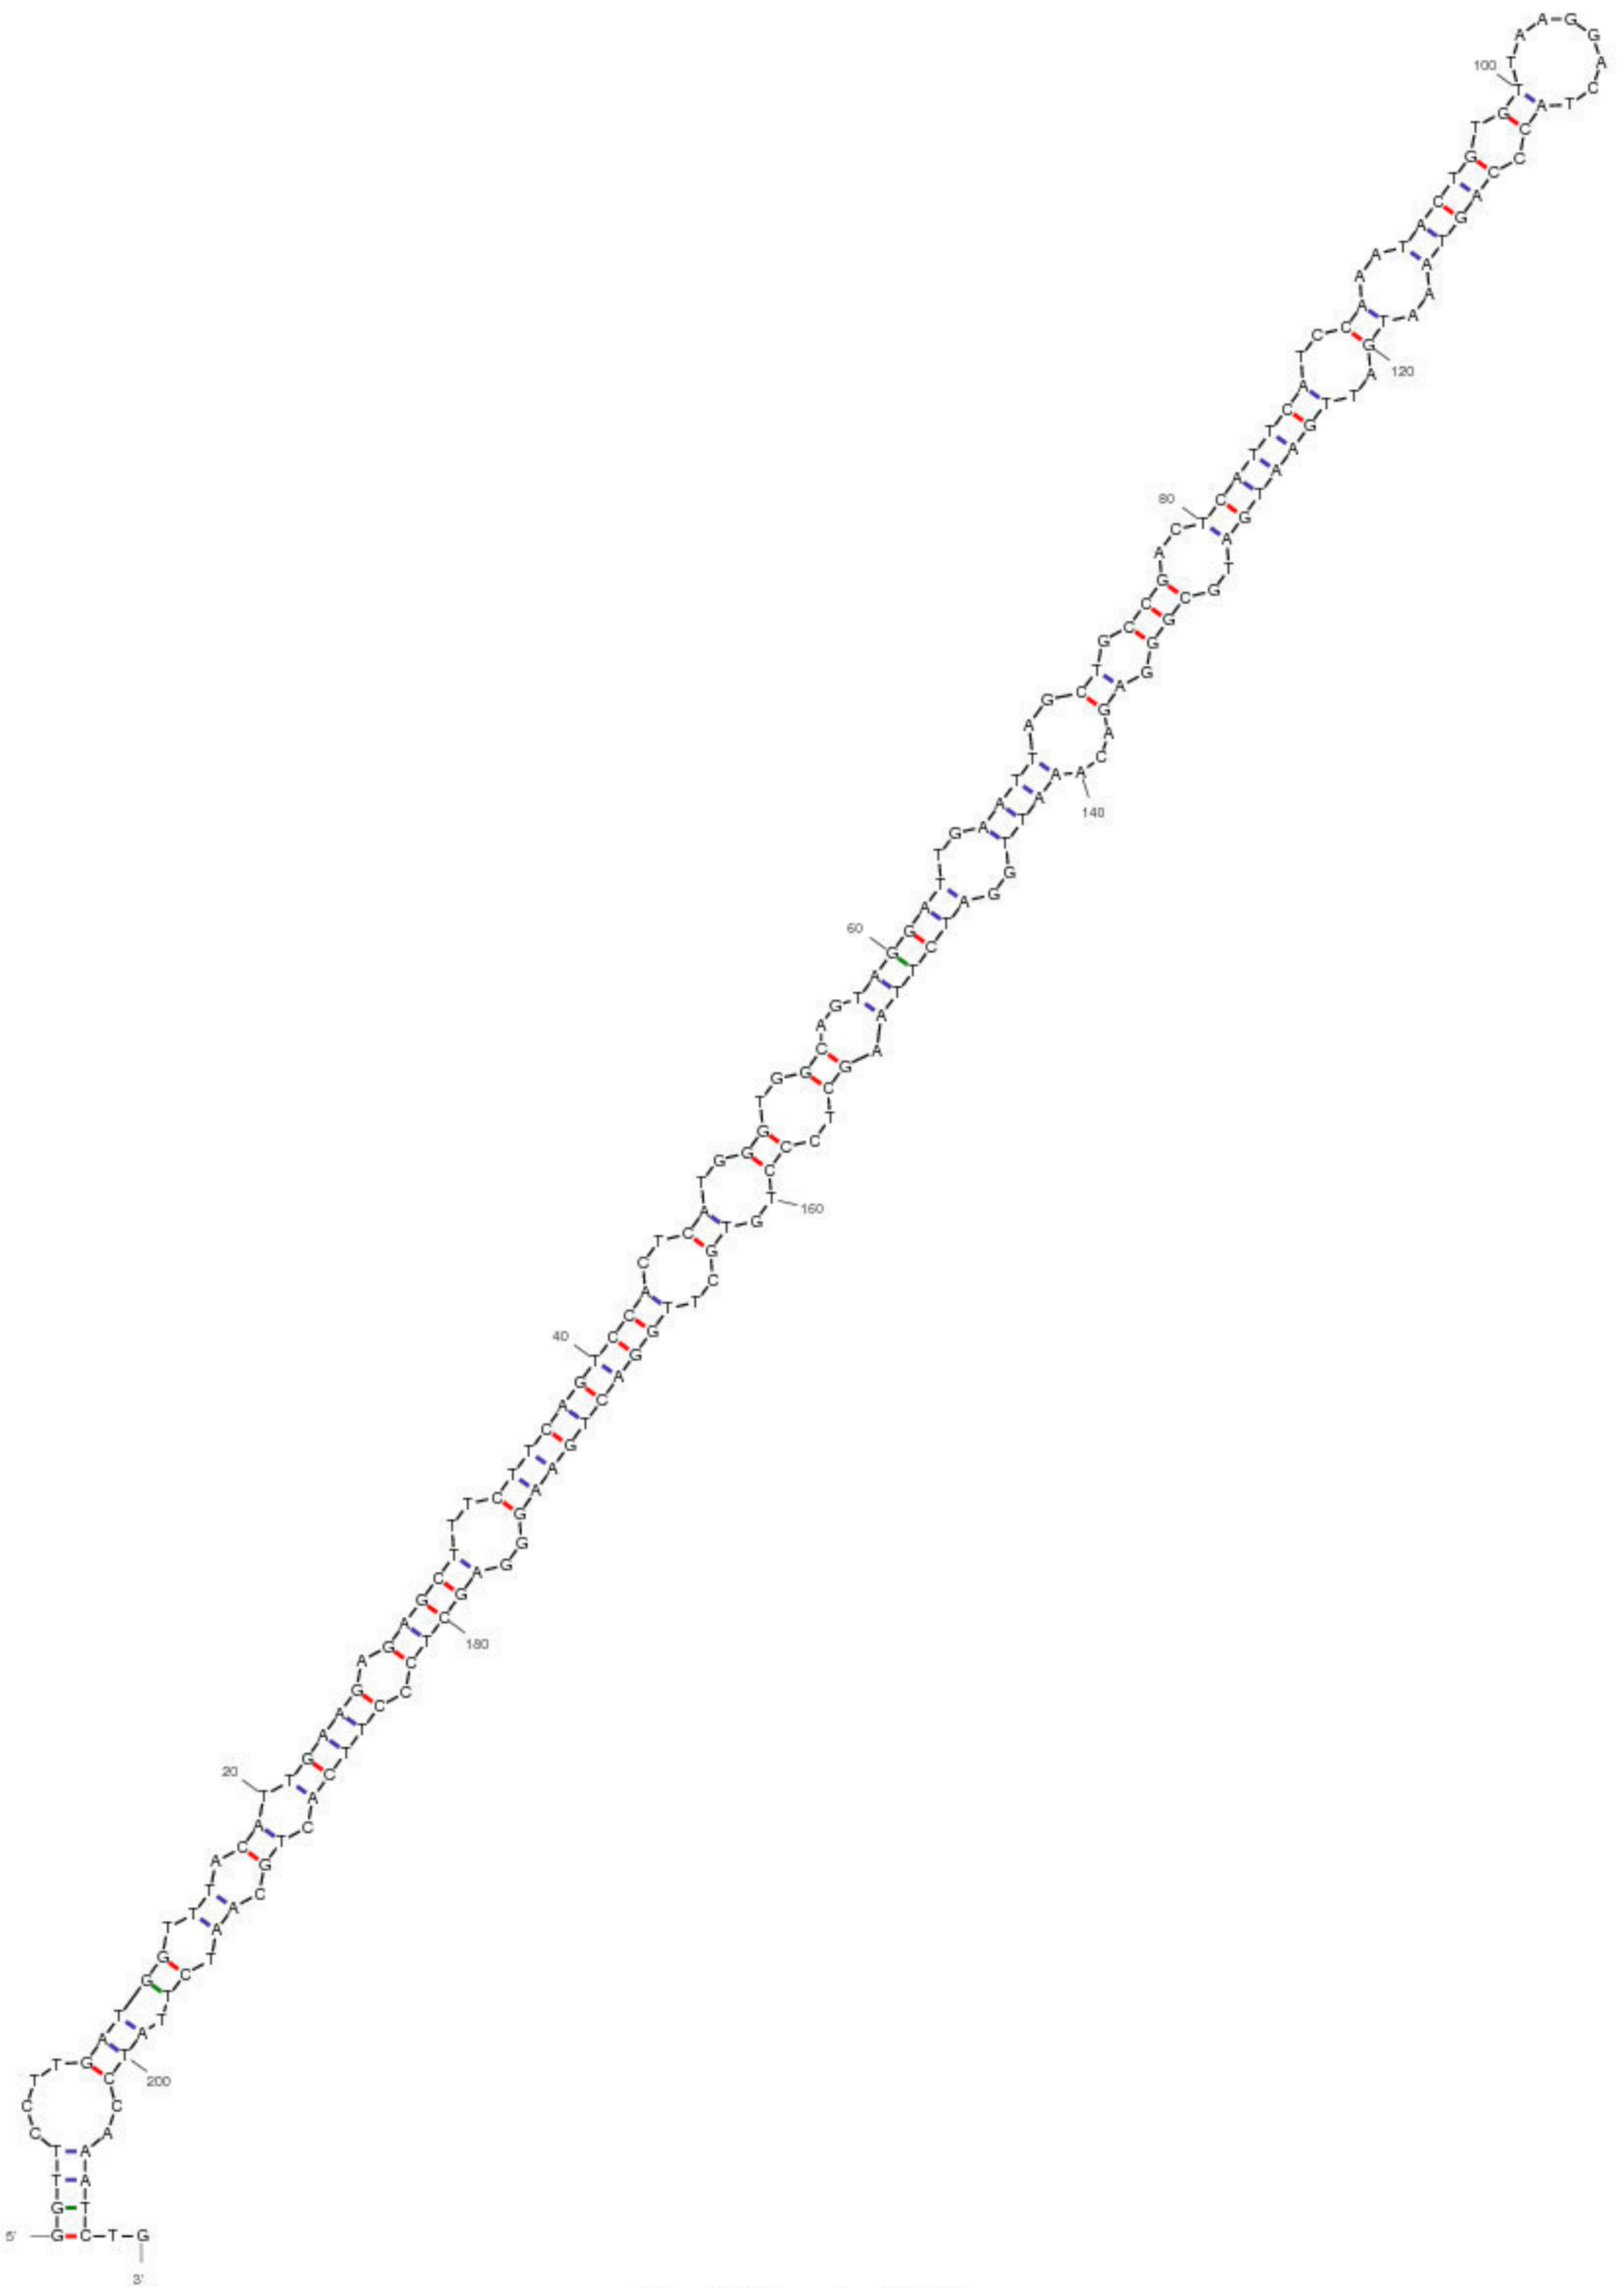

dG = -82.9 vvi-miR319c

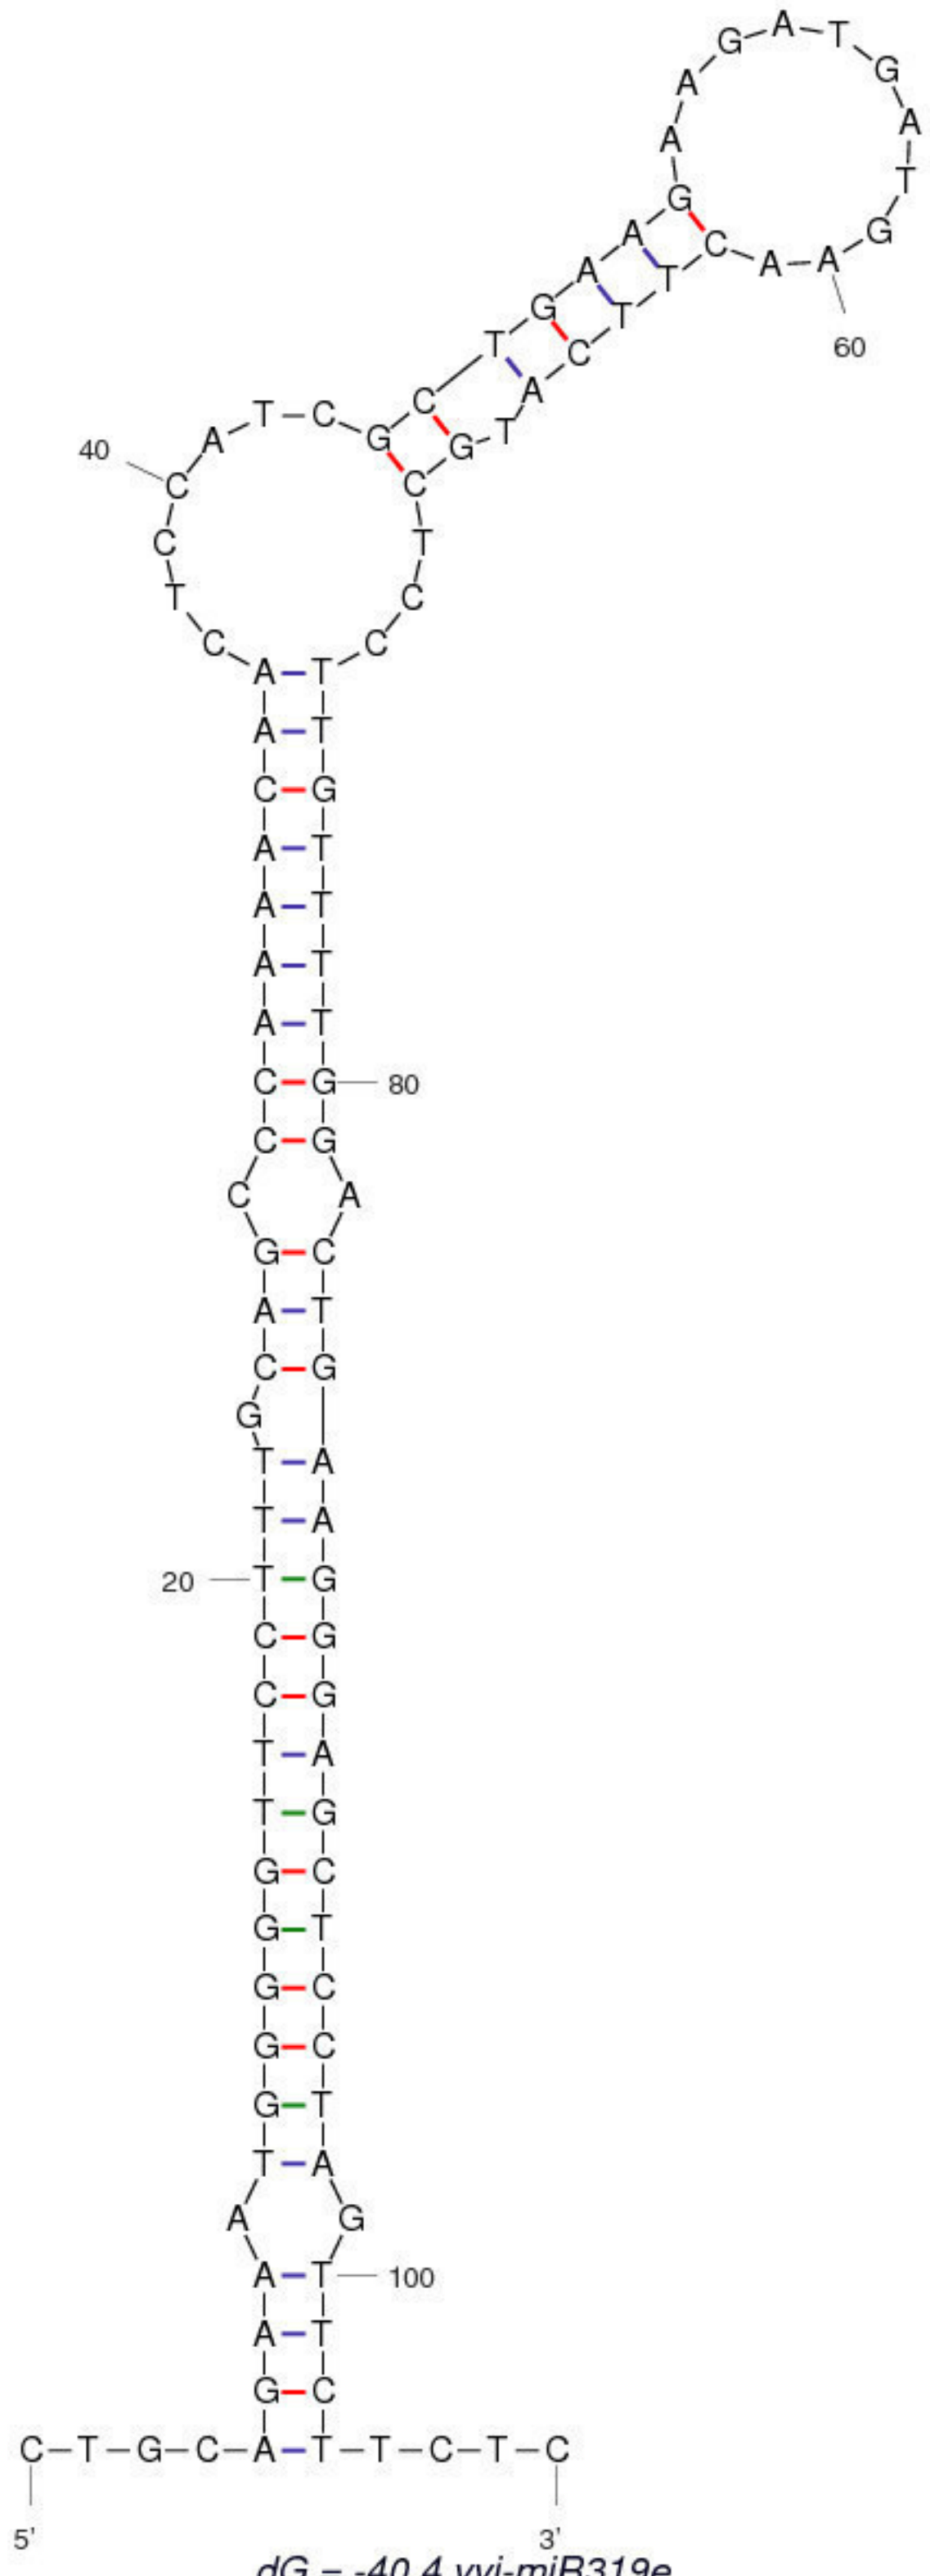

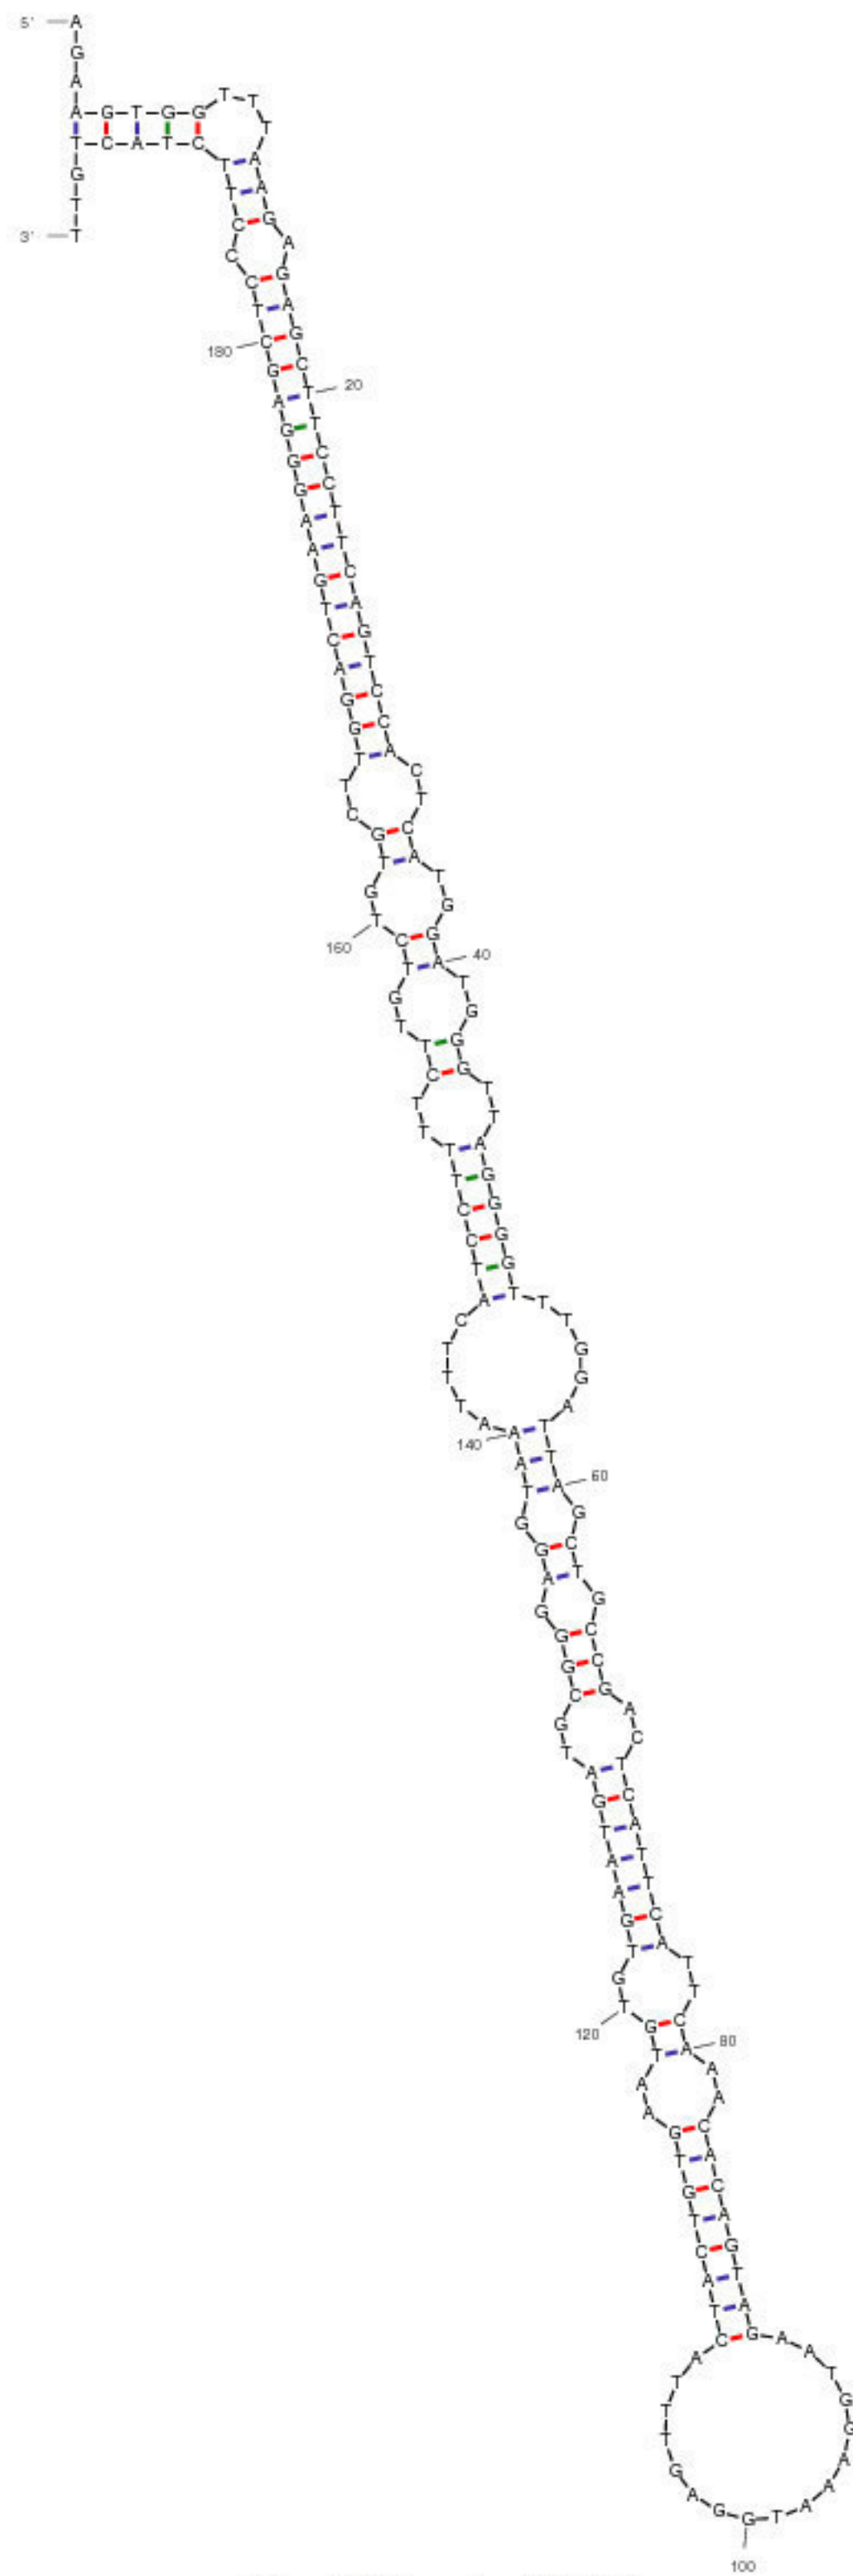

$dG = -87.2$  vvi-miR319f

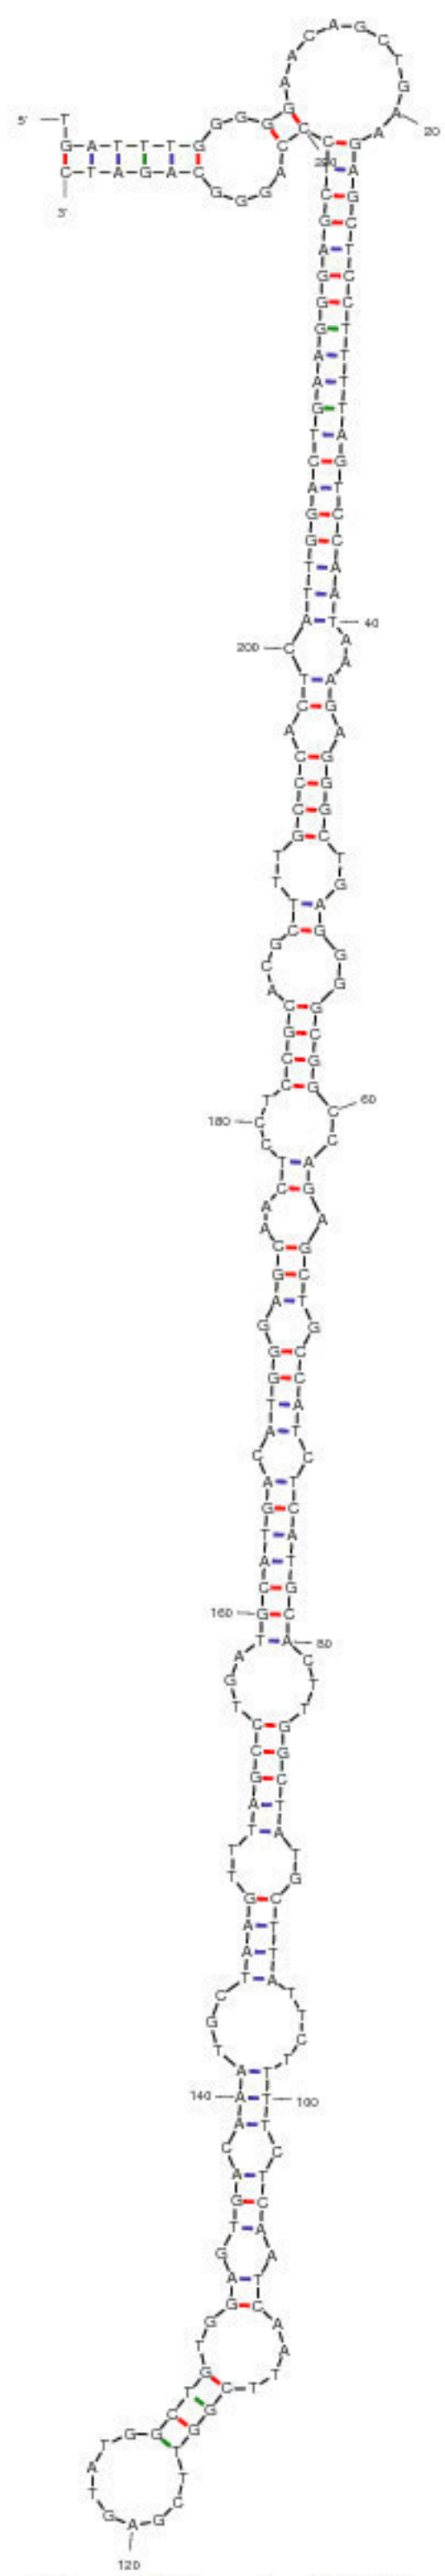

$dG = -92.1$  vvi-miR319g

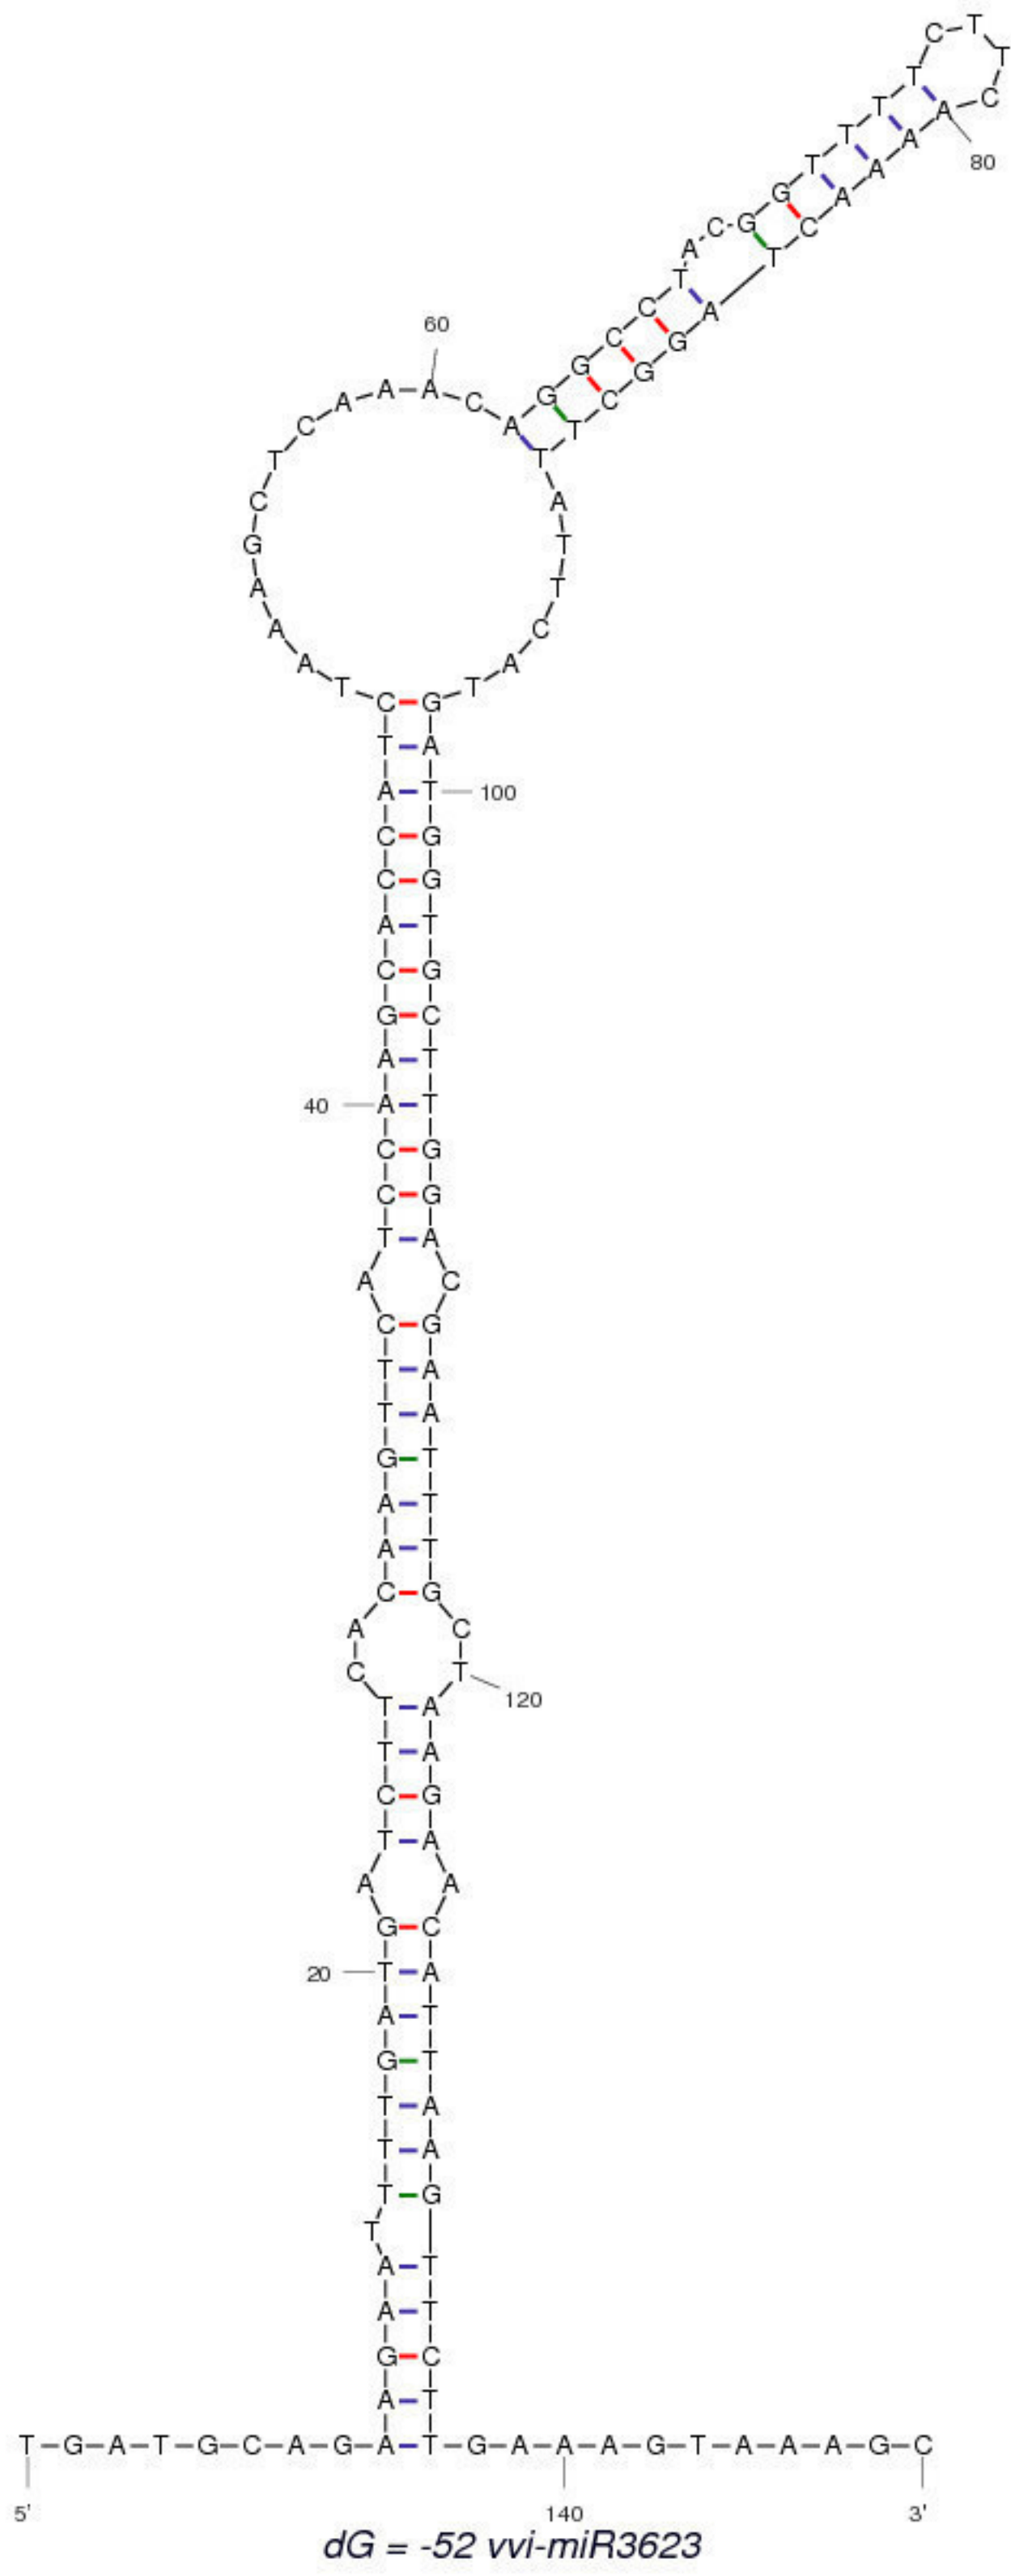

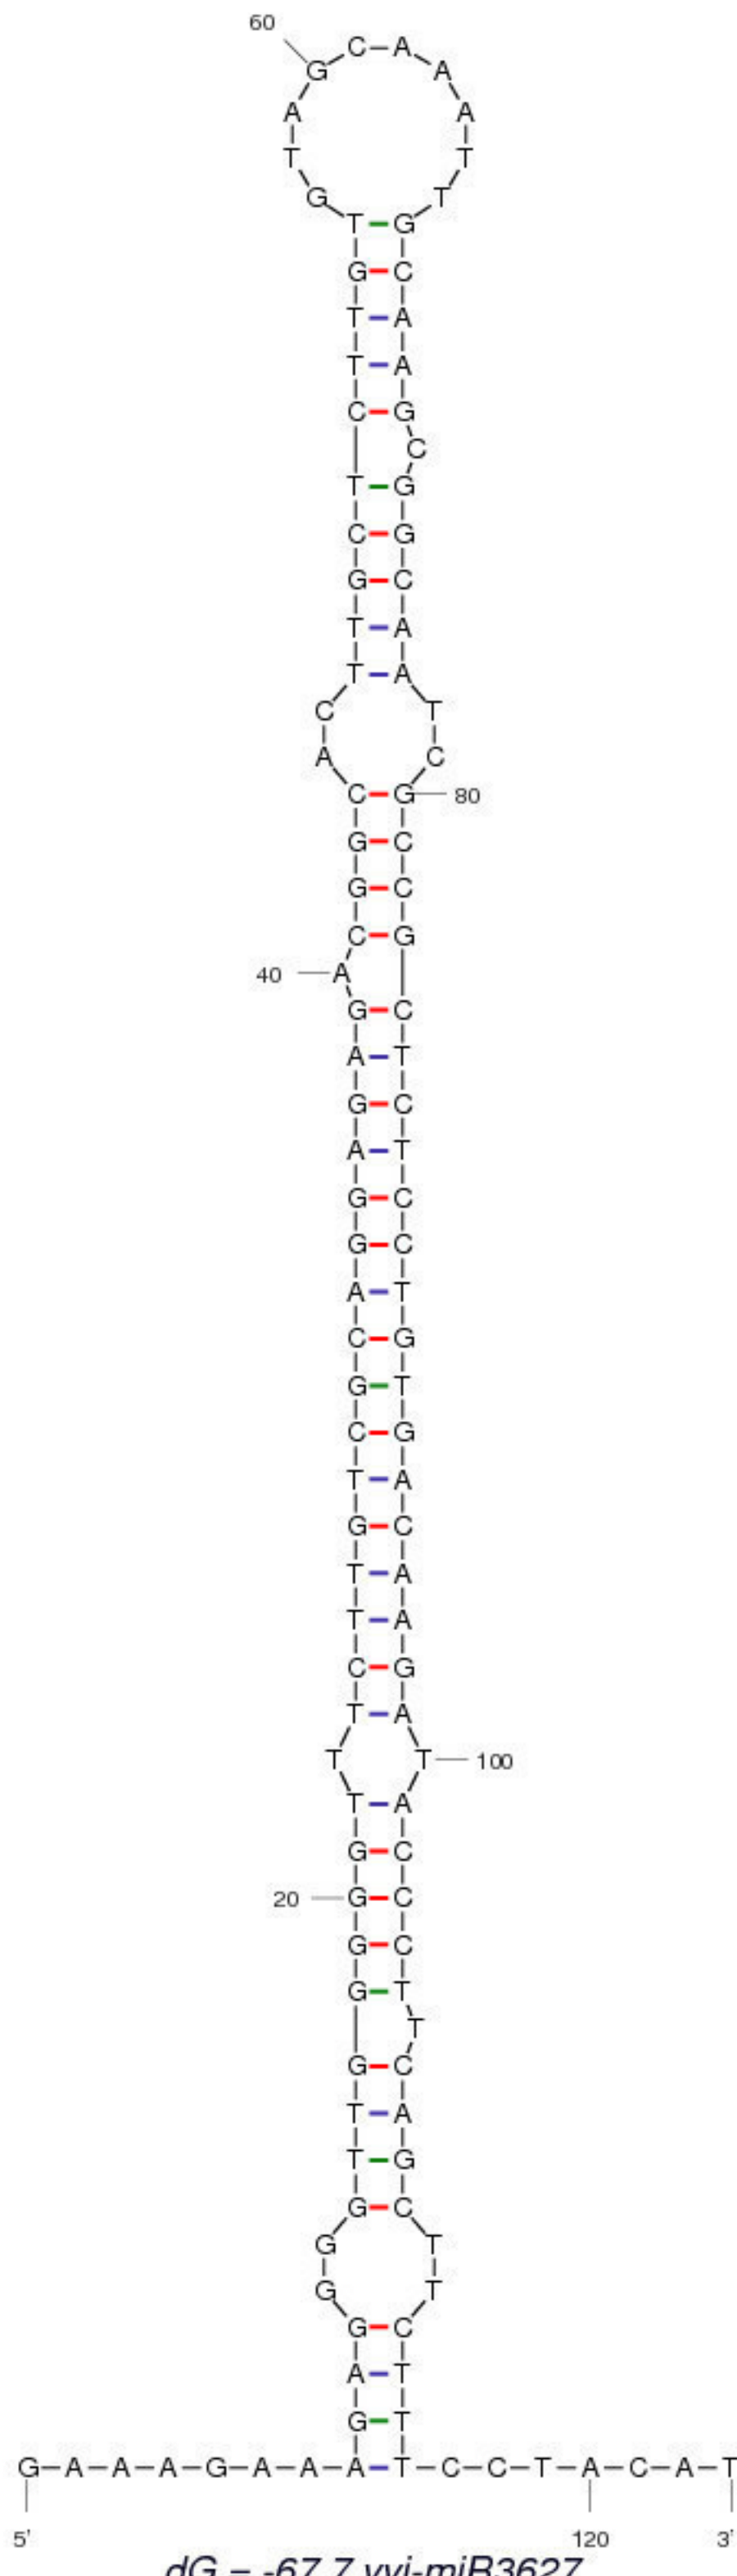

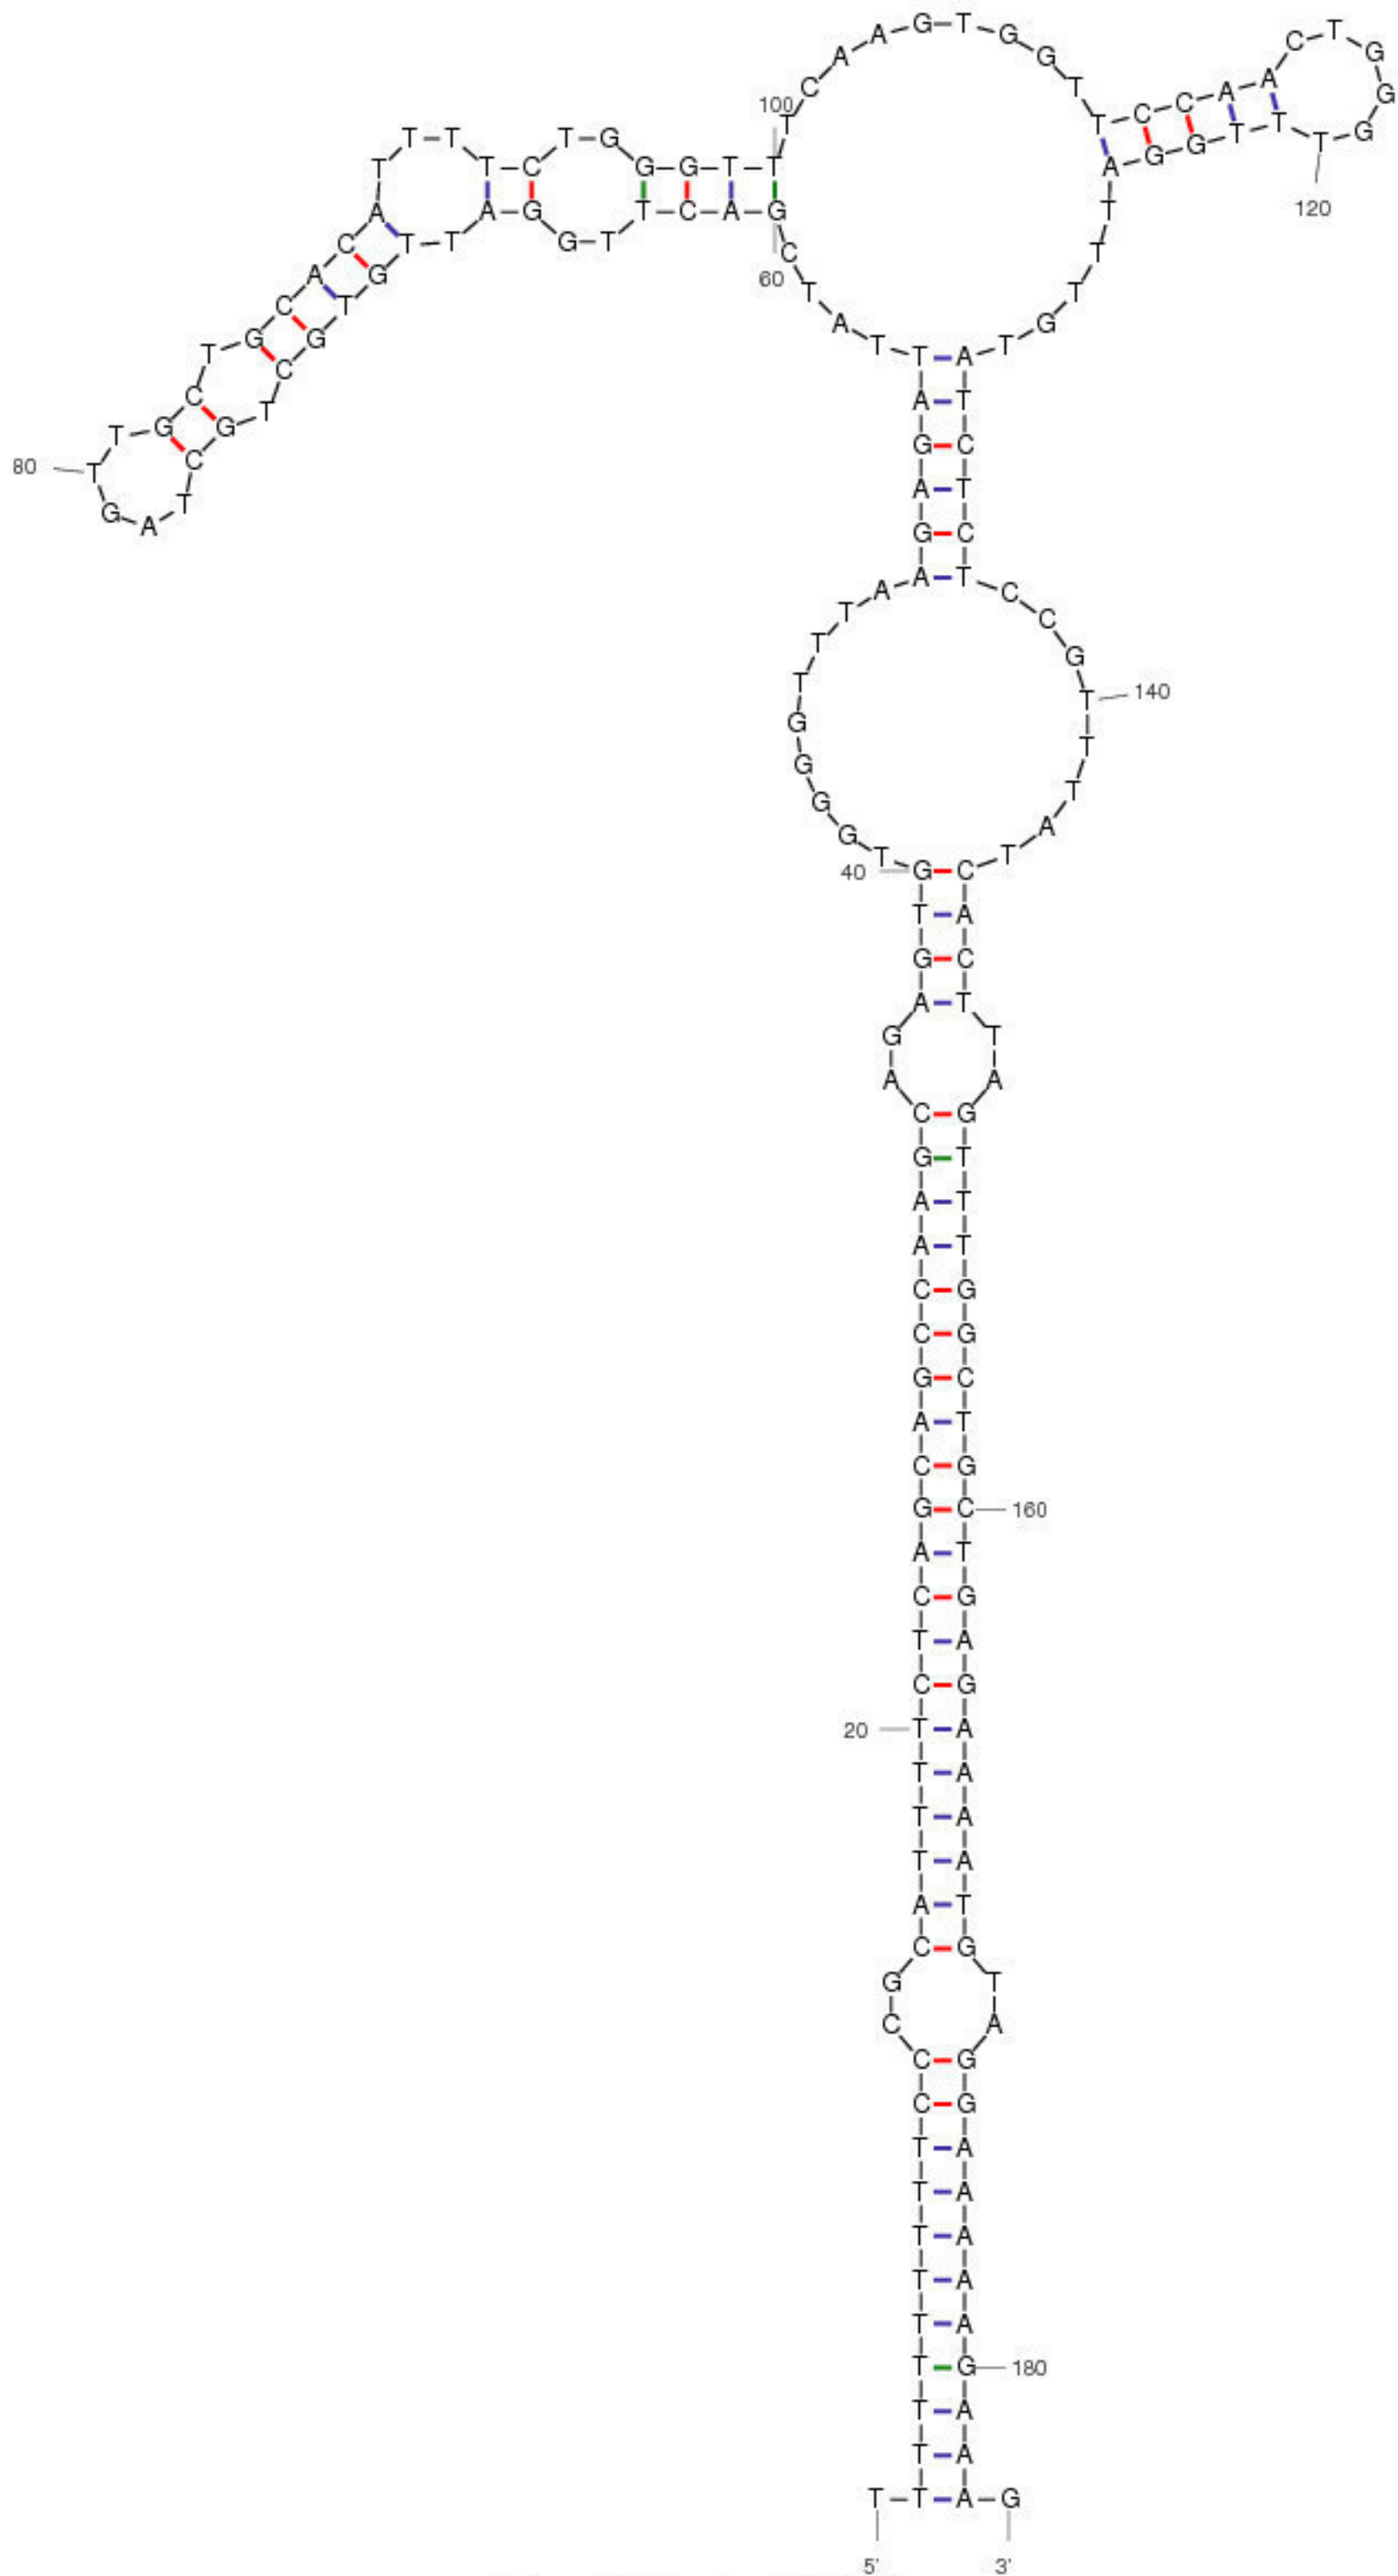

*dG = -81.2 vvi-miR3629a*

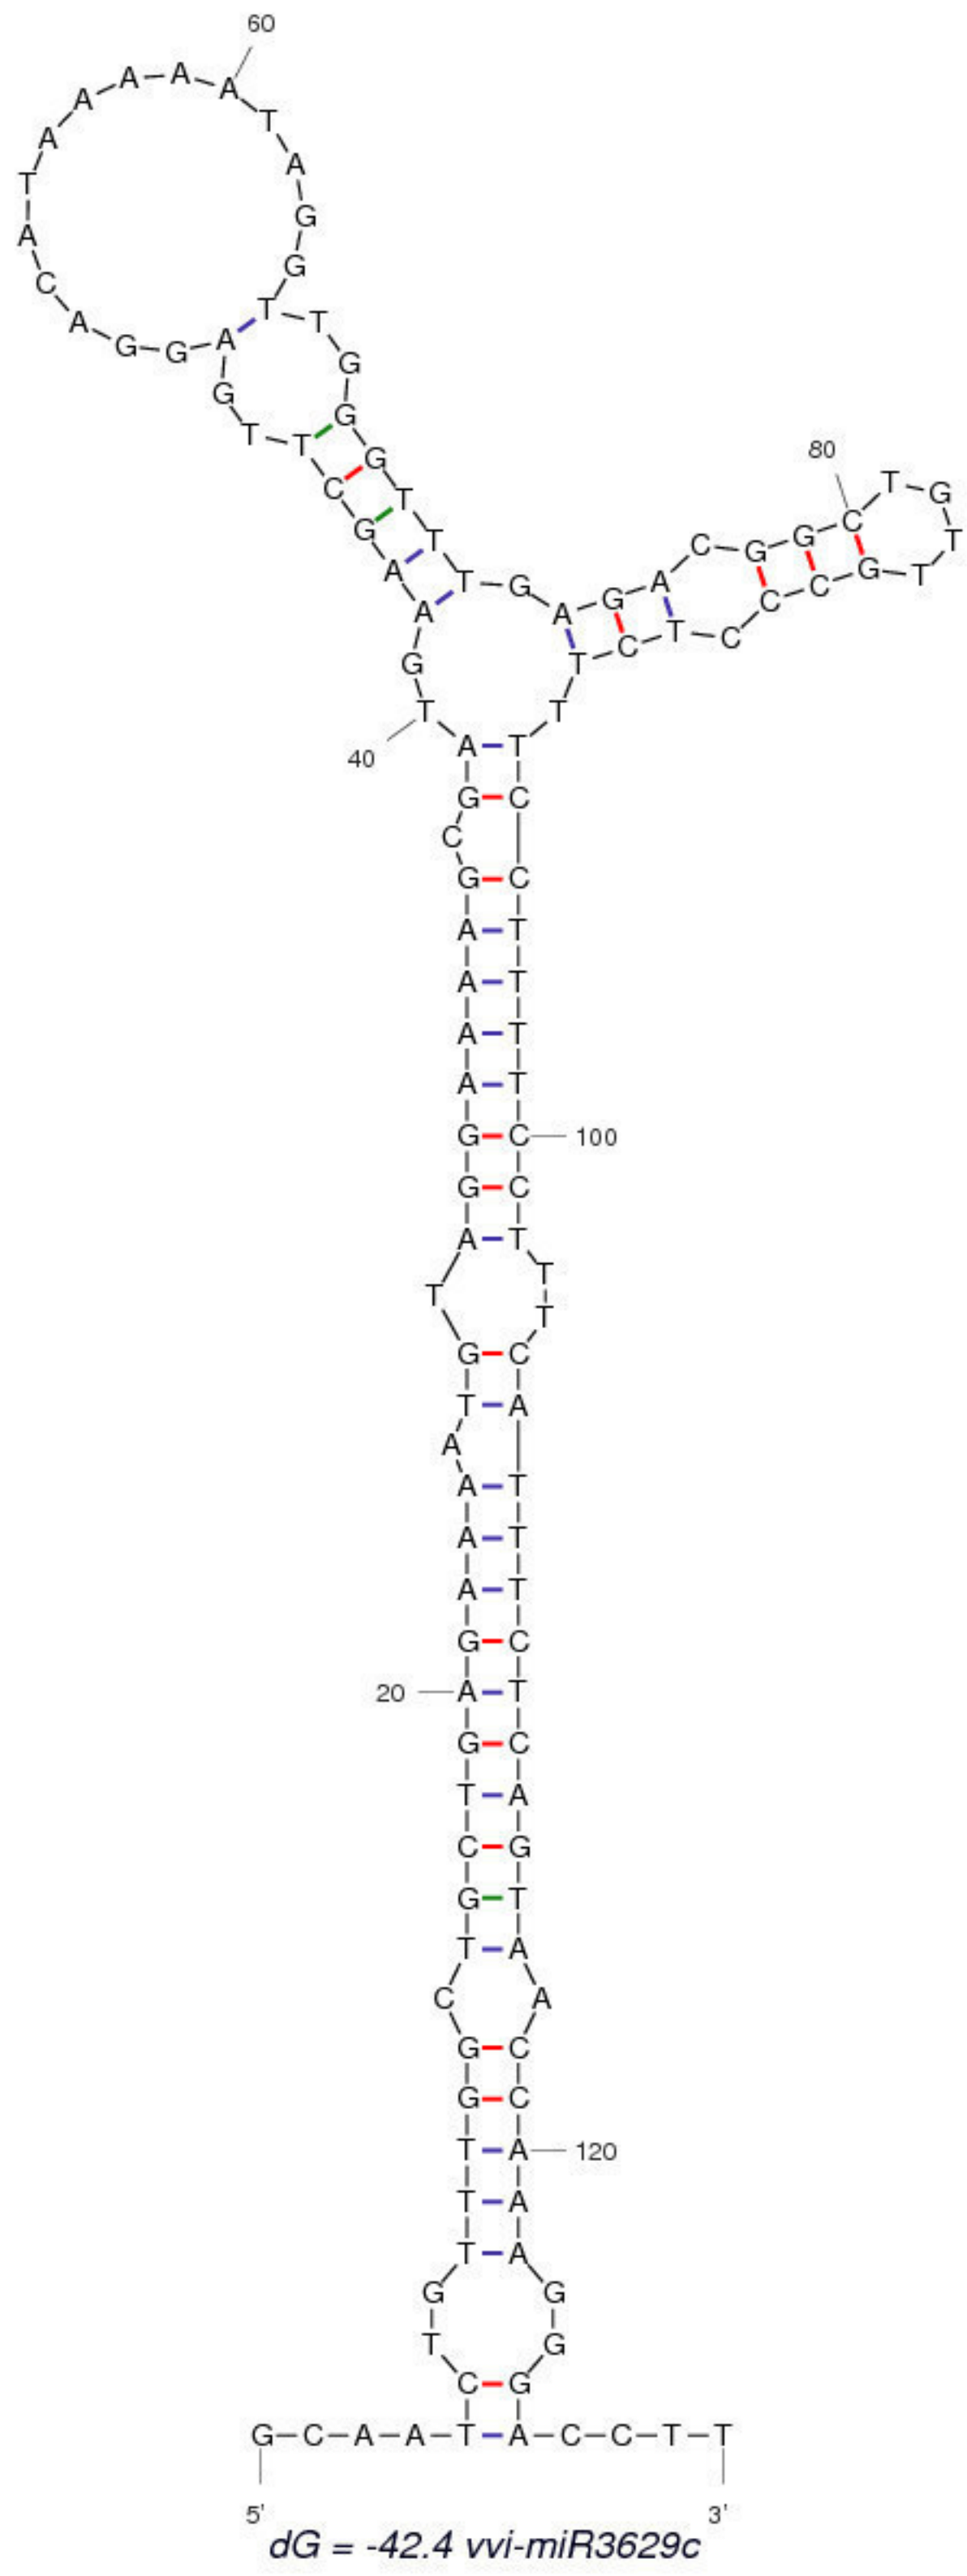



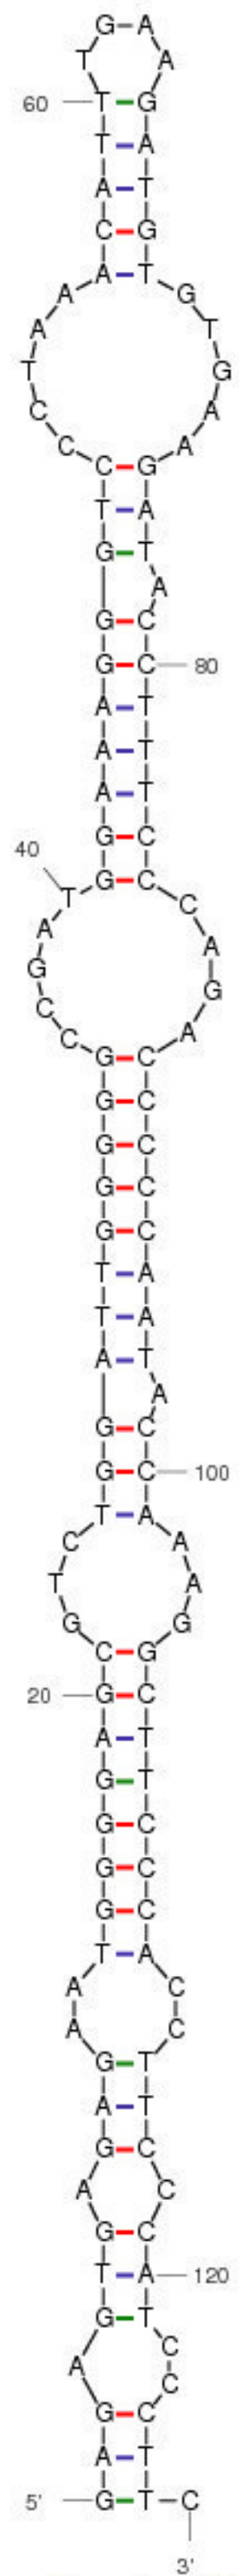

*dG = -51 vvi-miR3632*

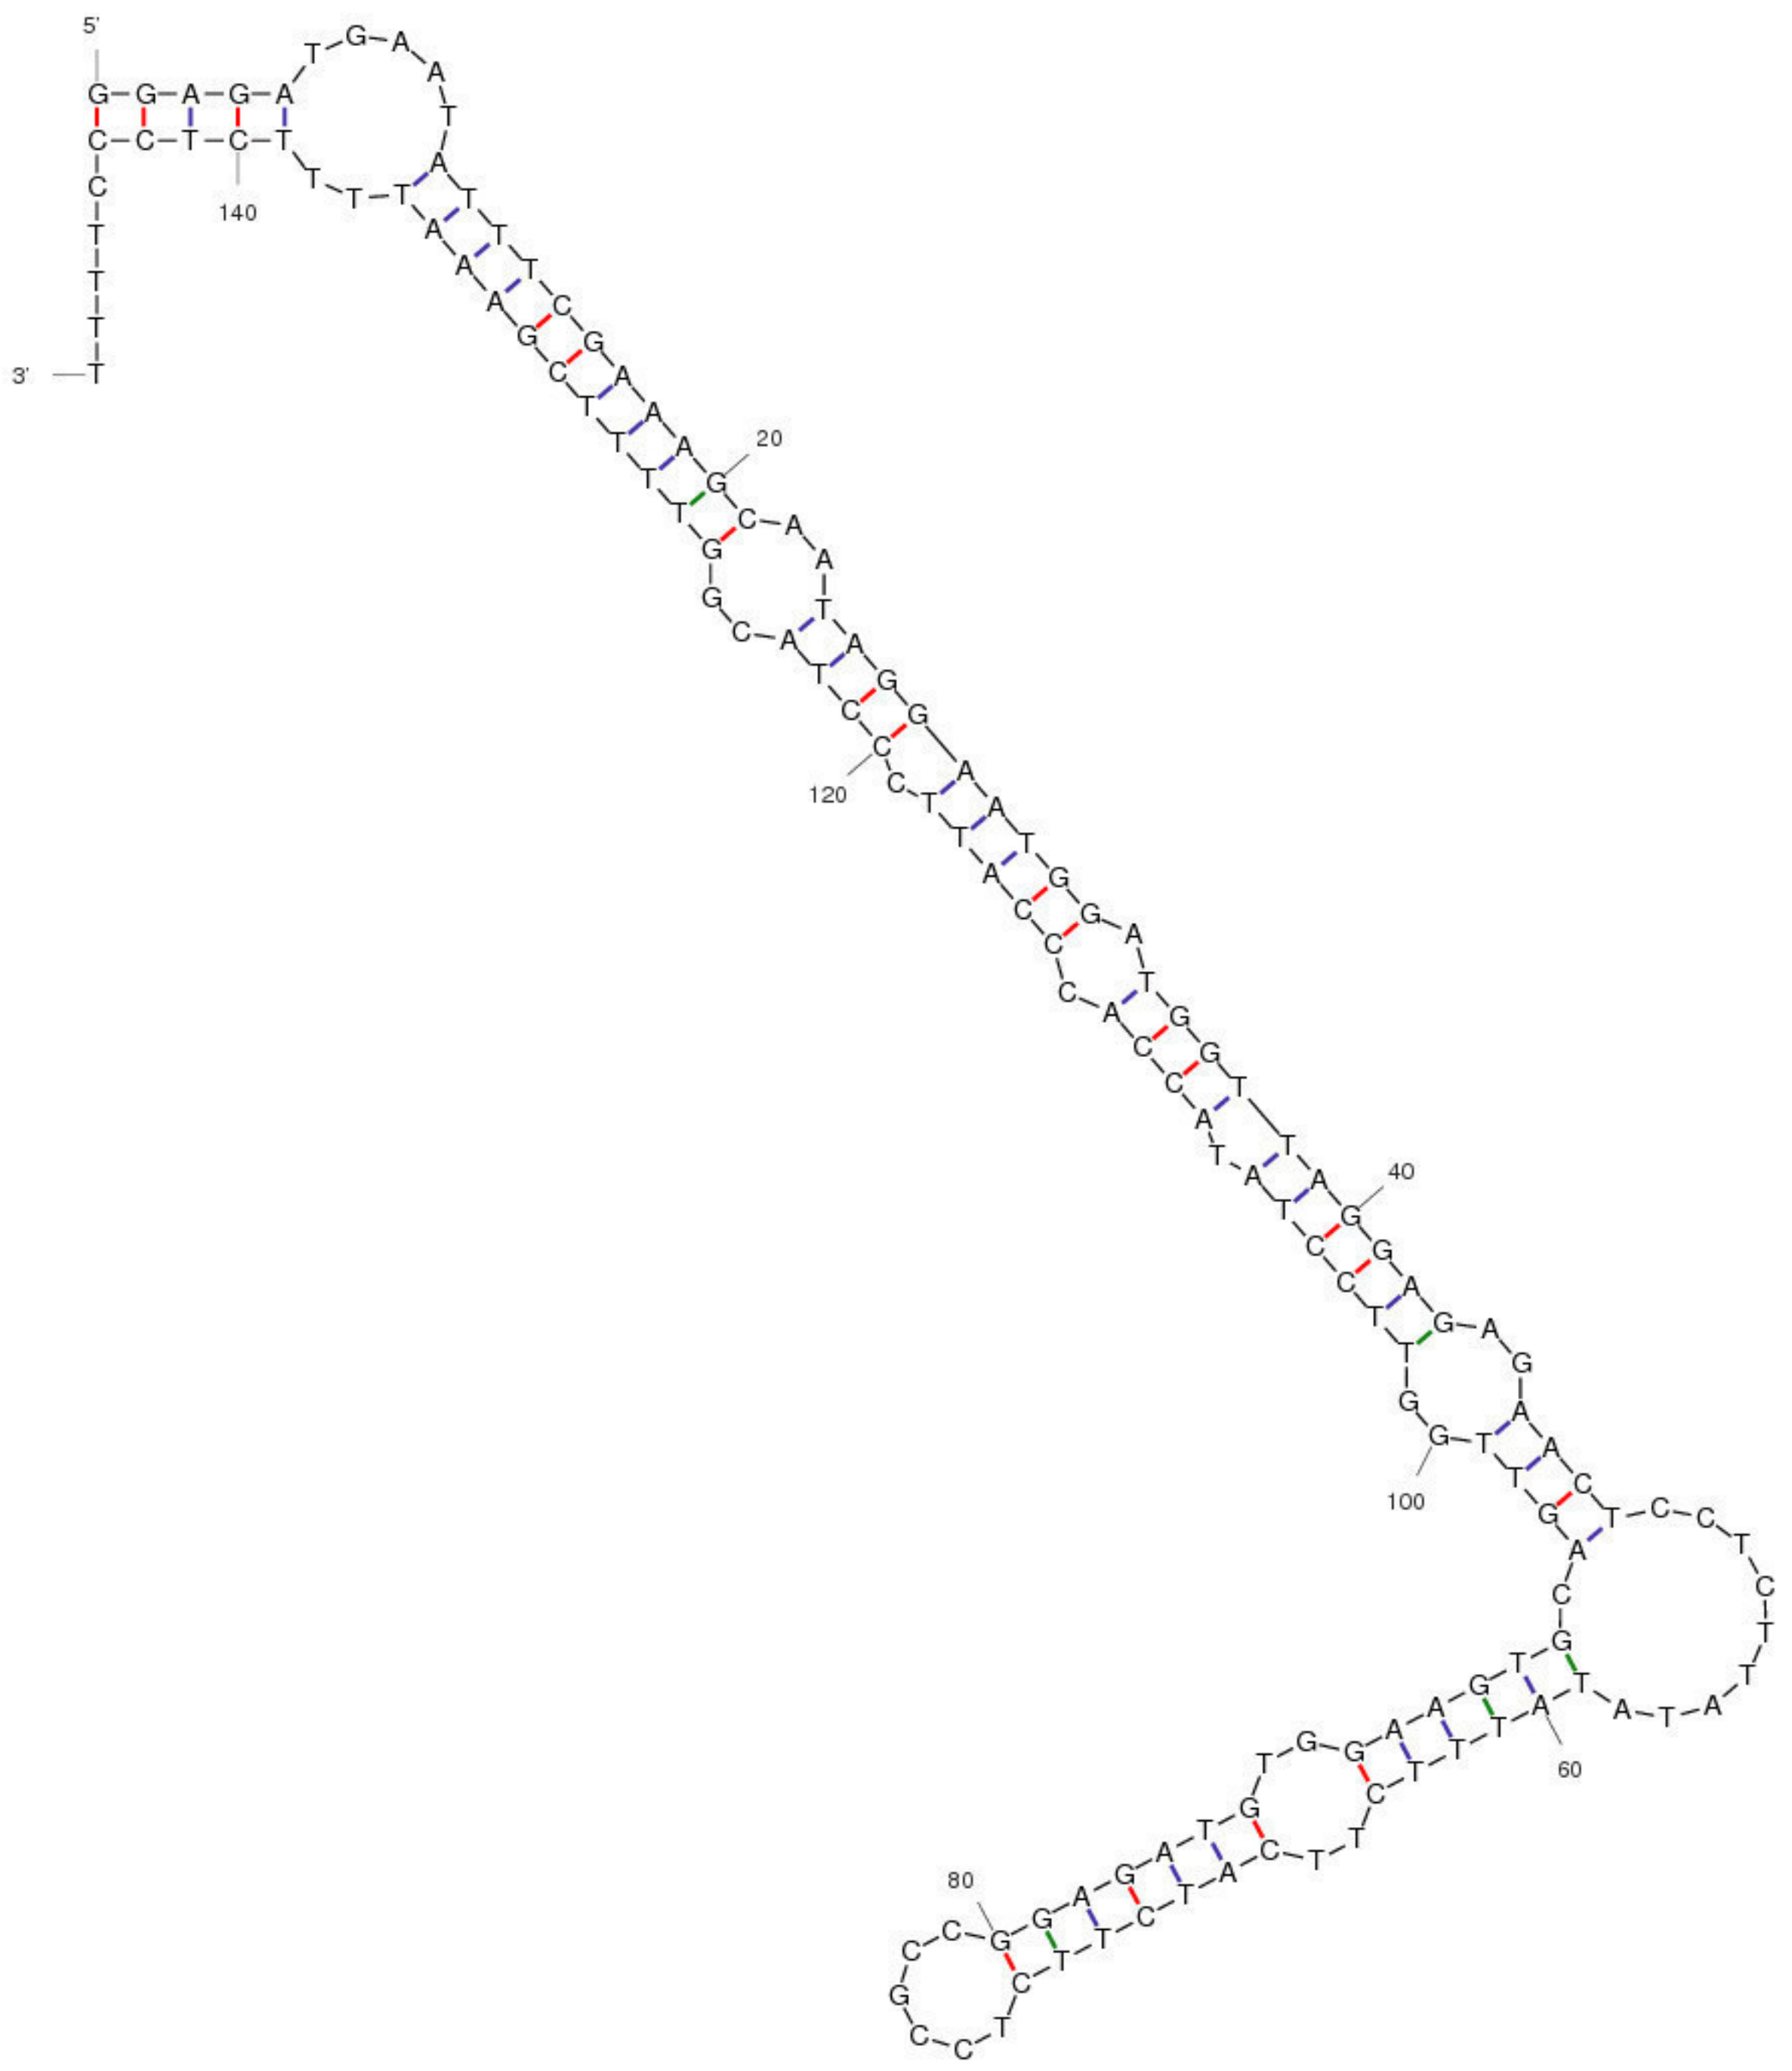

$dG = -58.7$  vvi-miR3633a

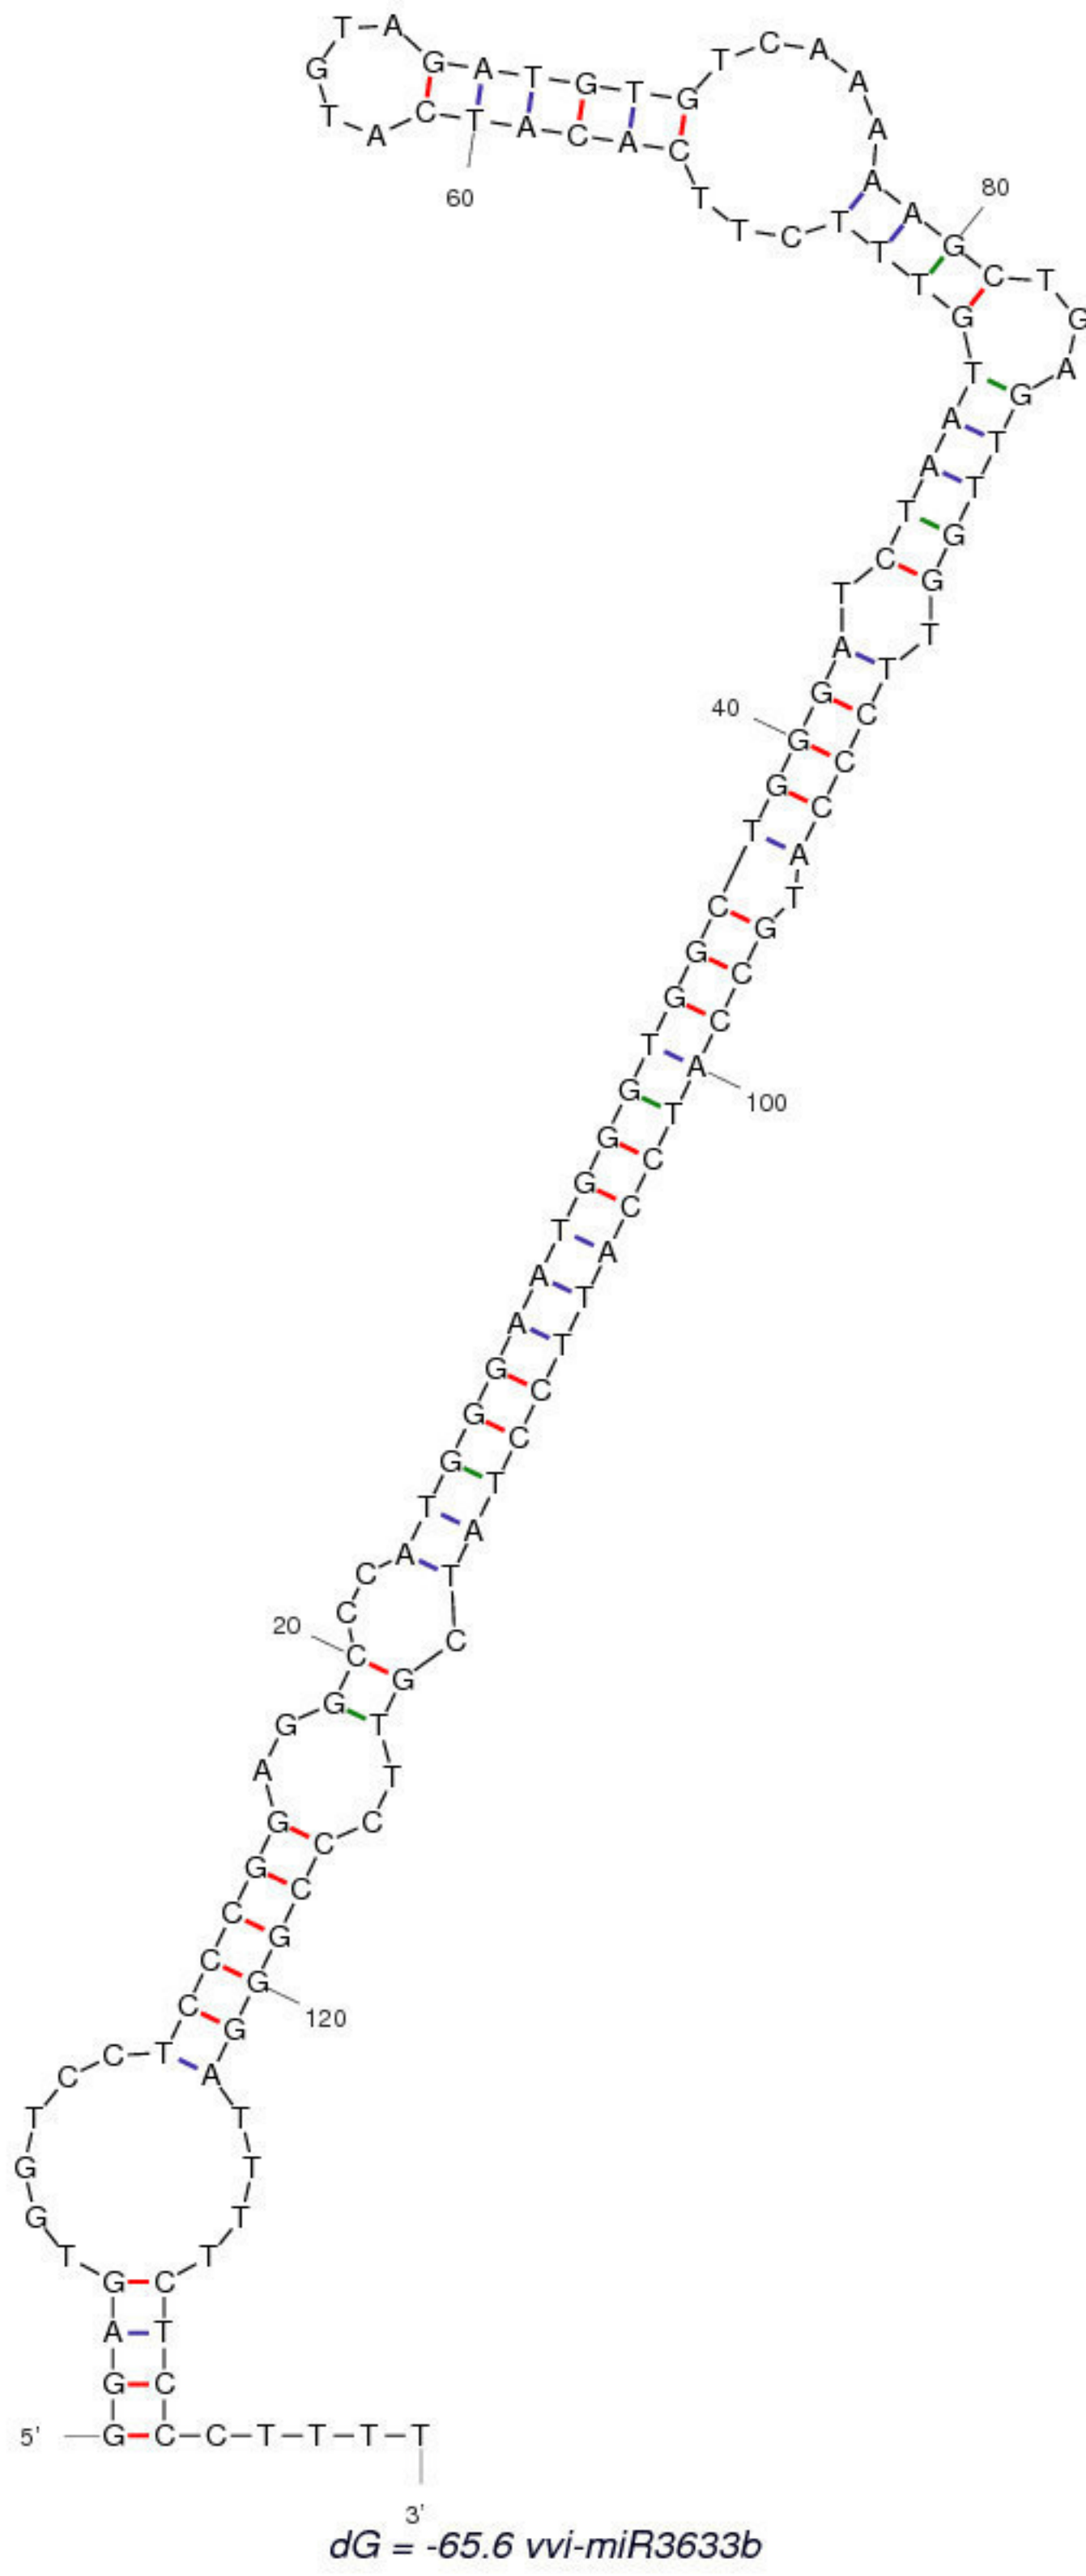

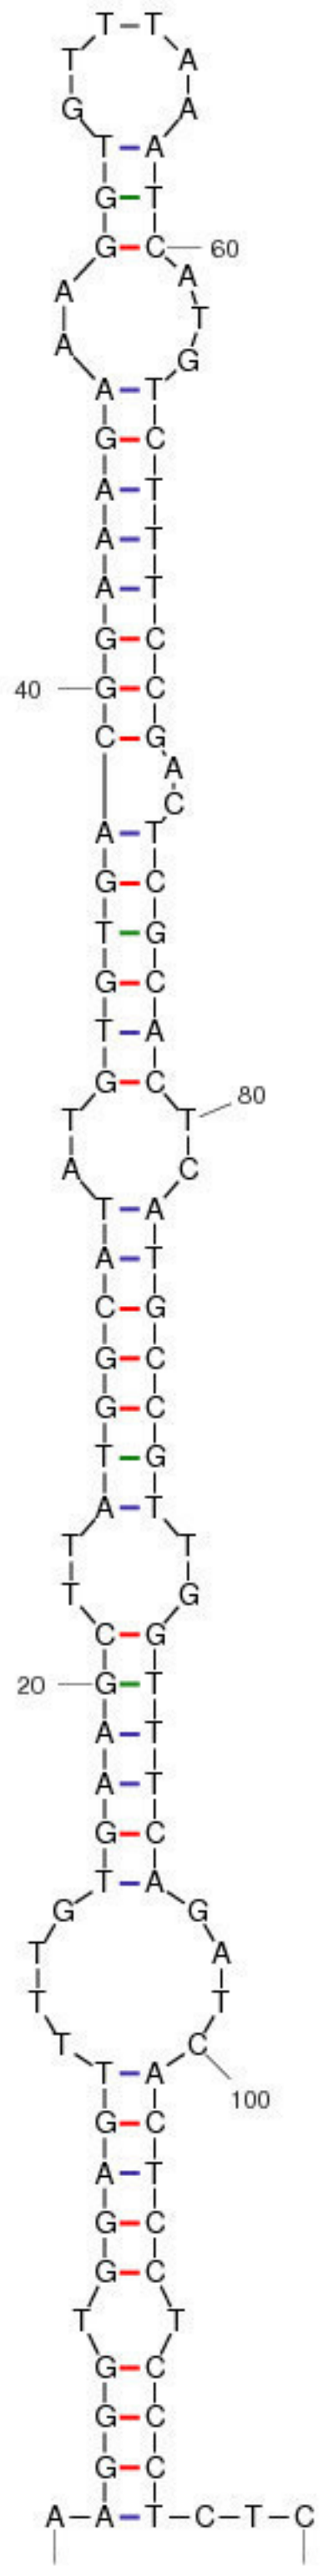

$dG = -53.9$  vvi-miR3634

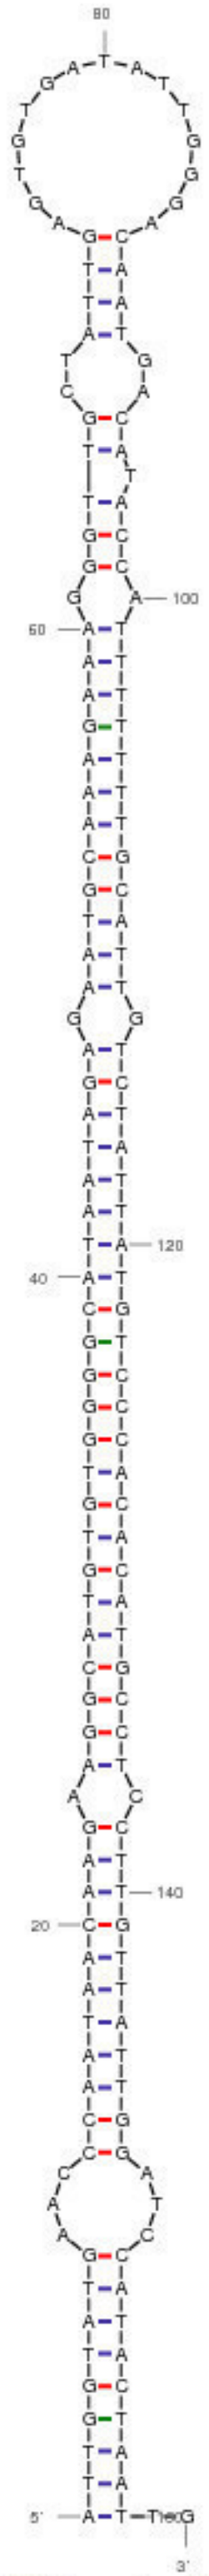

$dG = -87.9$  vvi-miR3635

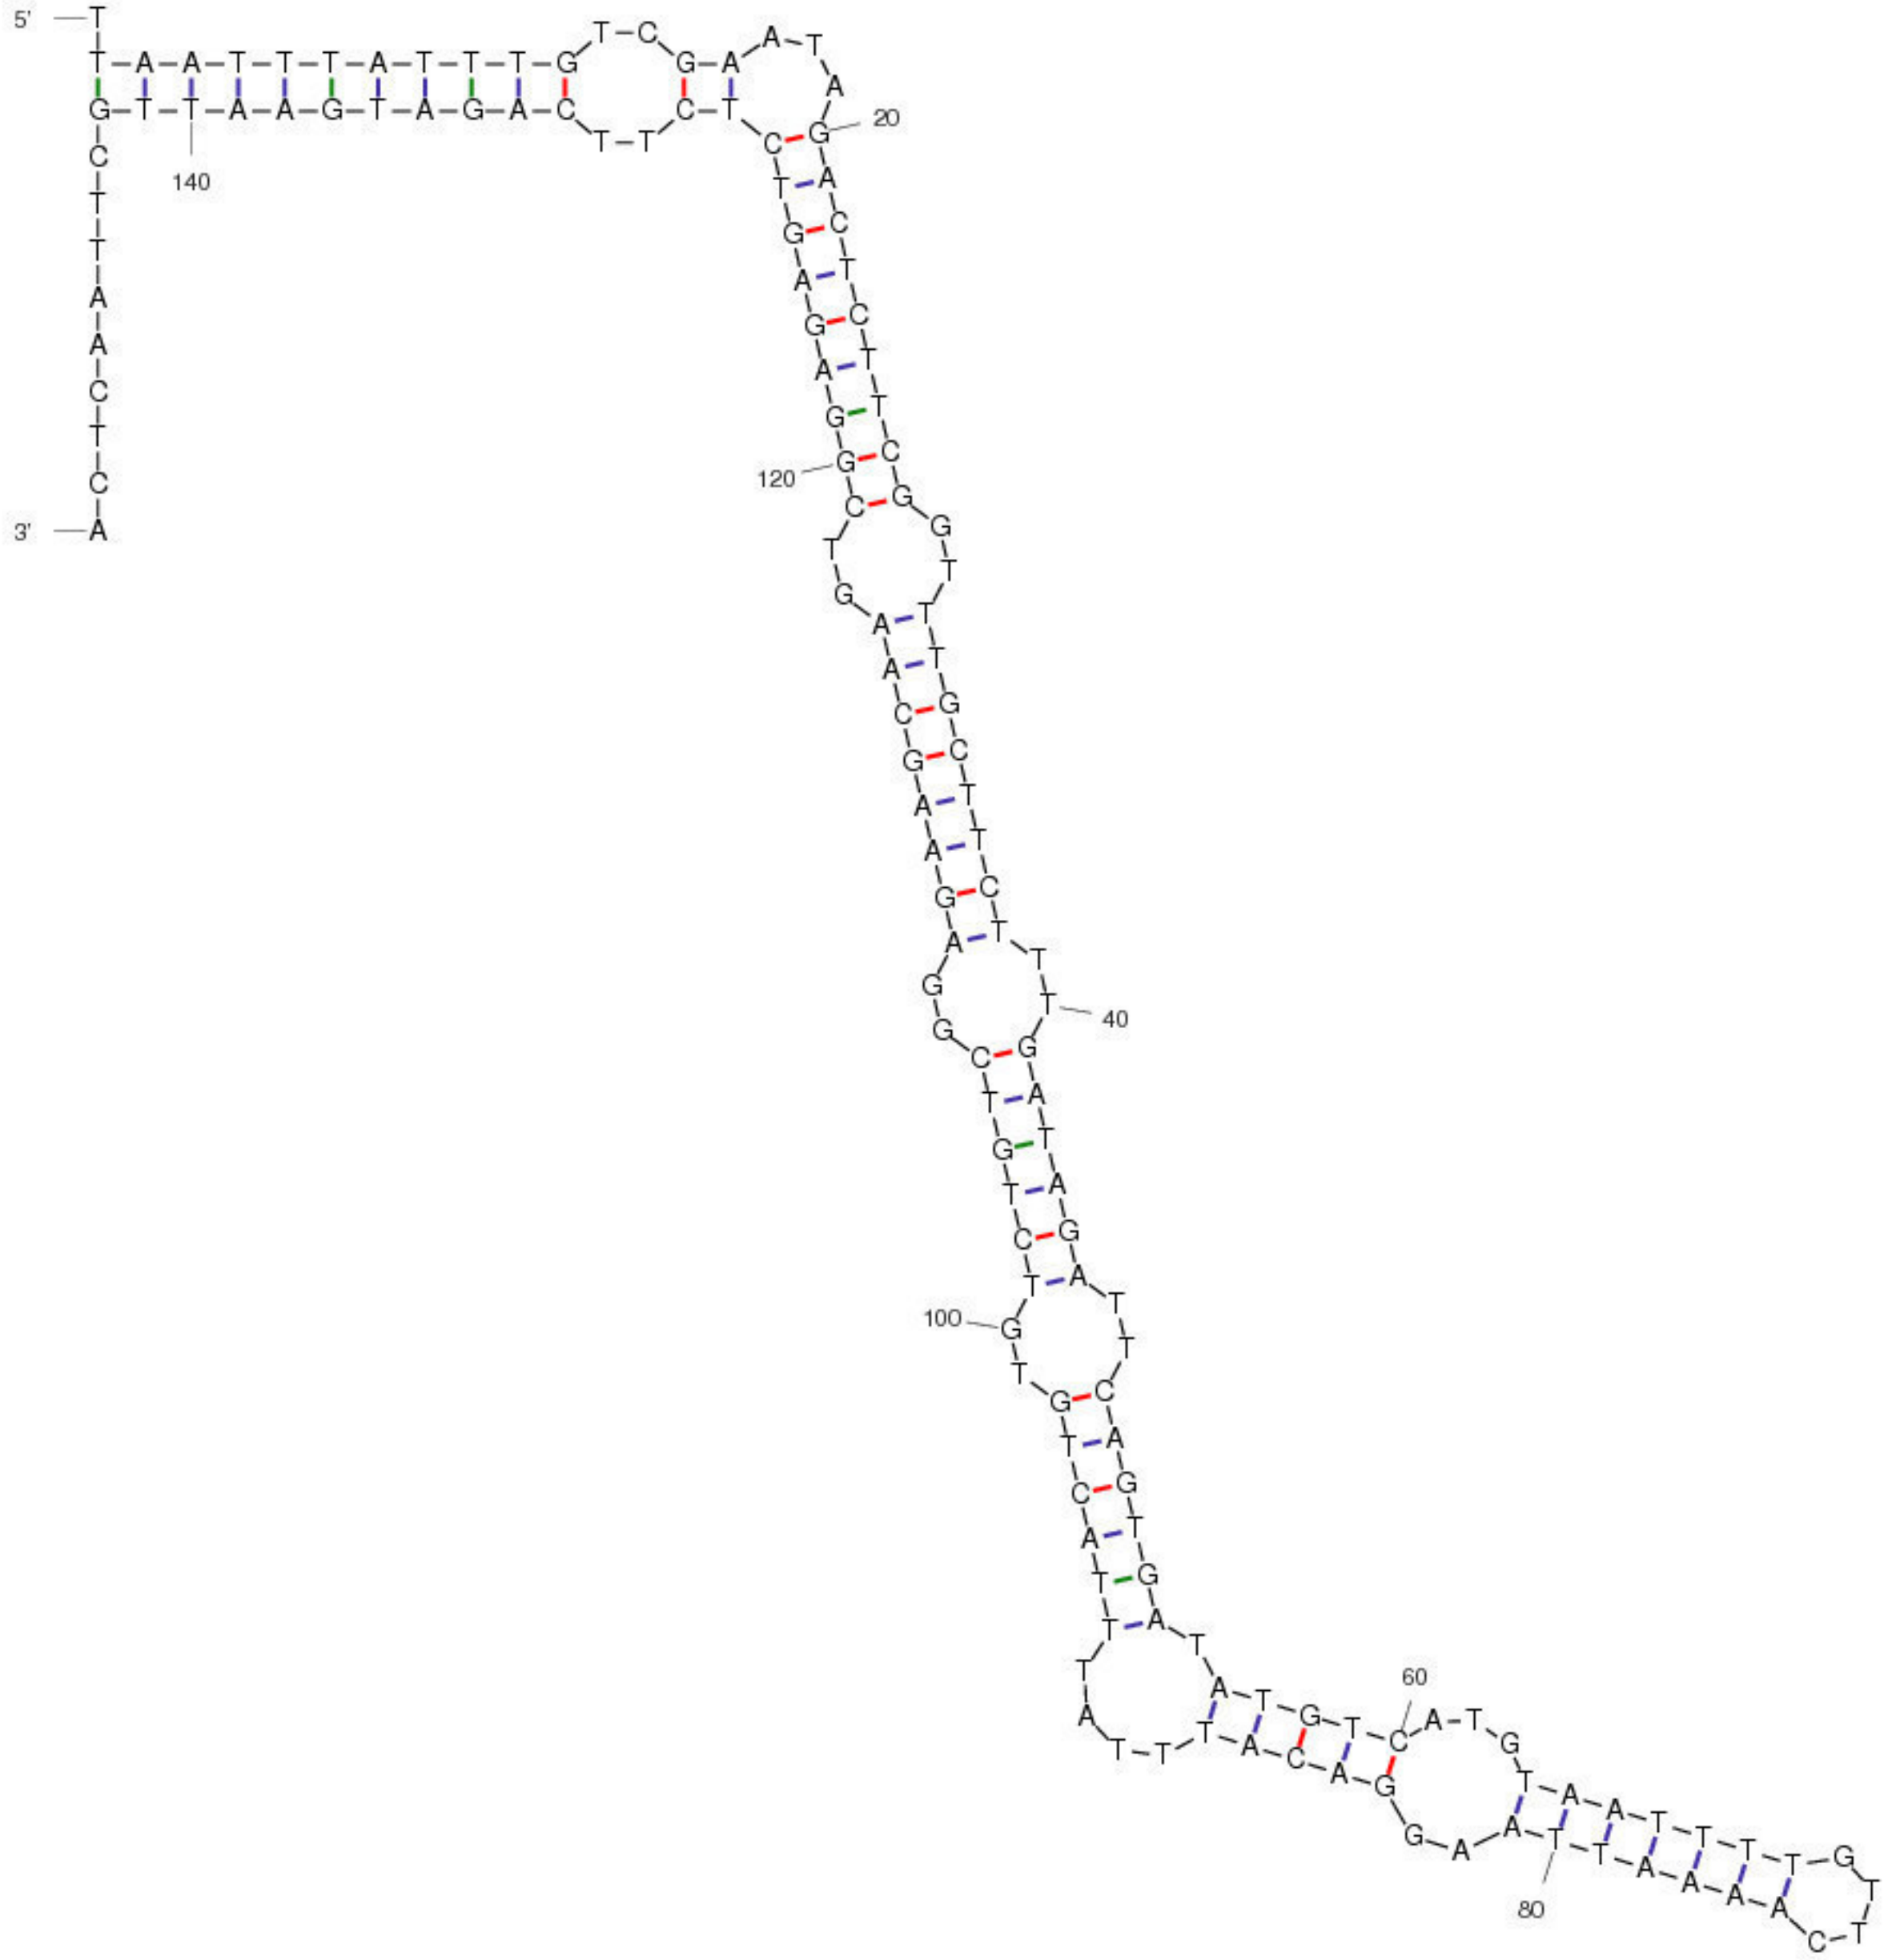

$dG = -65.6$  vvi-miR3636

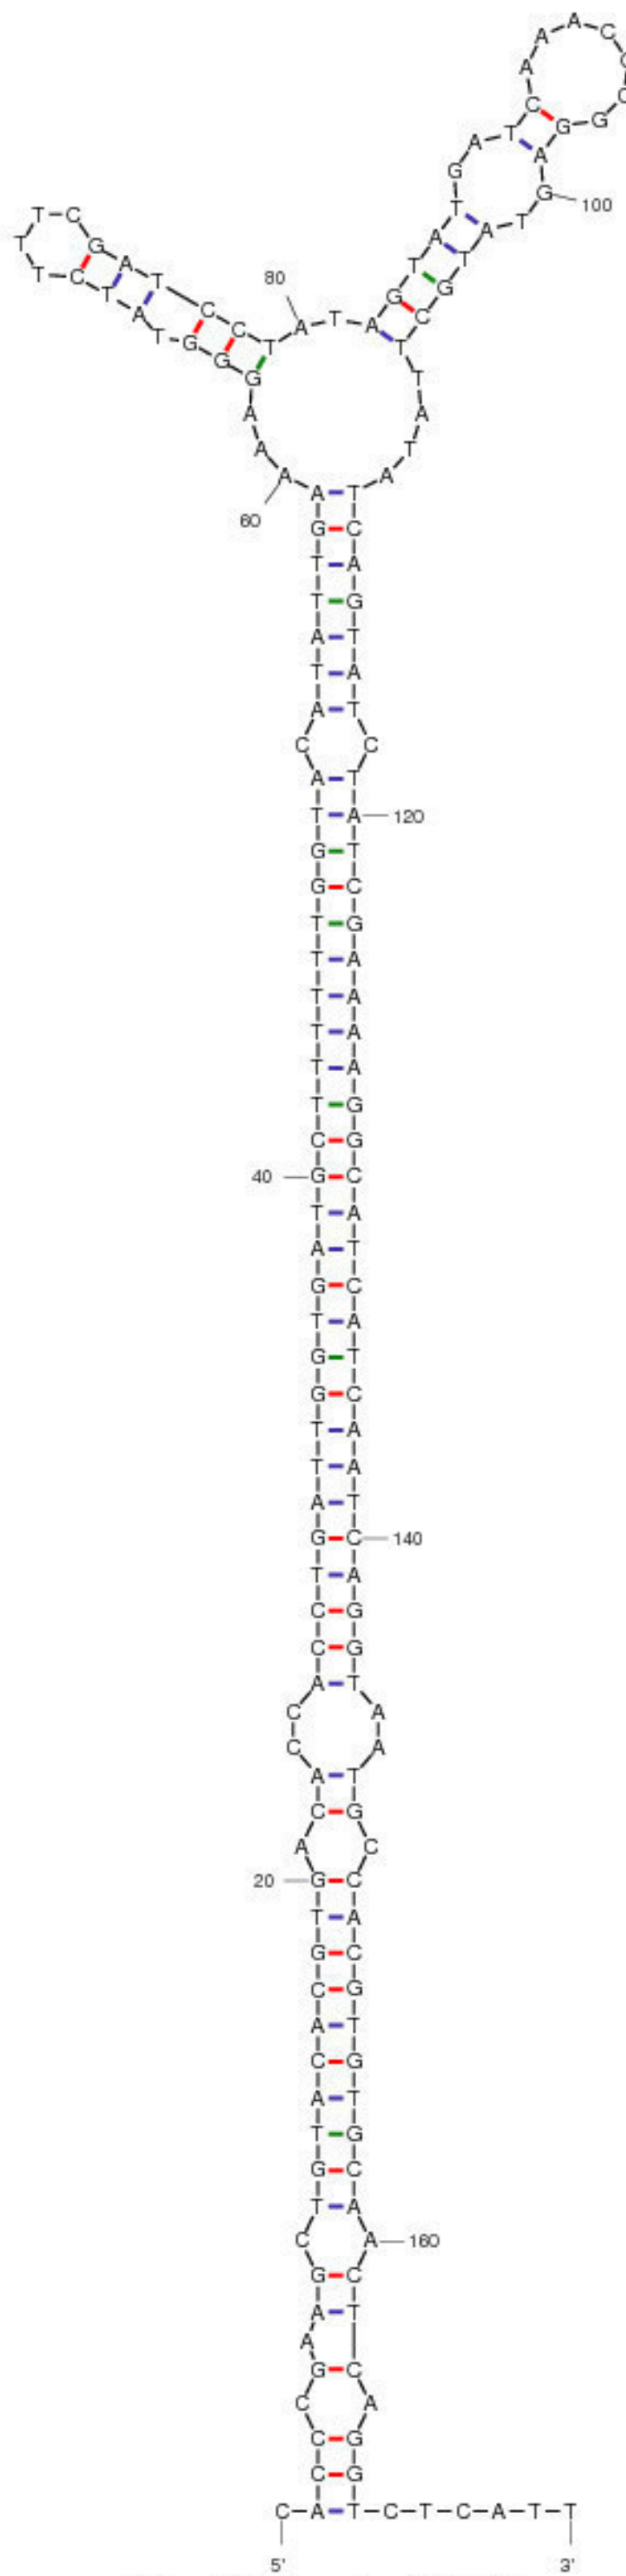

$dG = -74.8$  vvi-miR3640

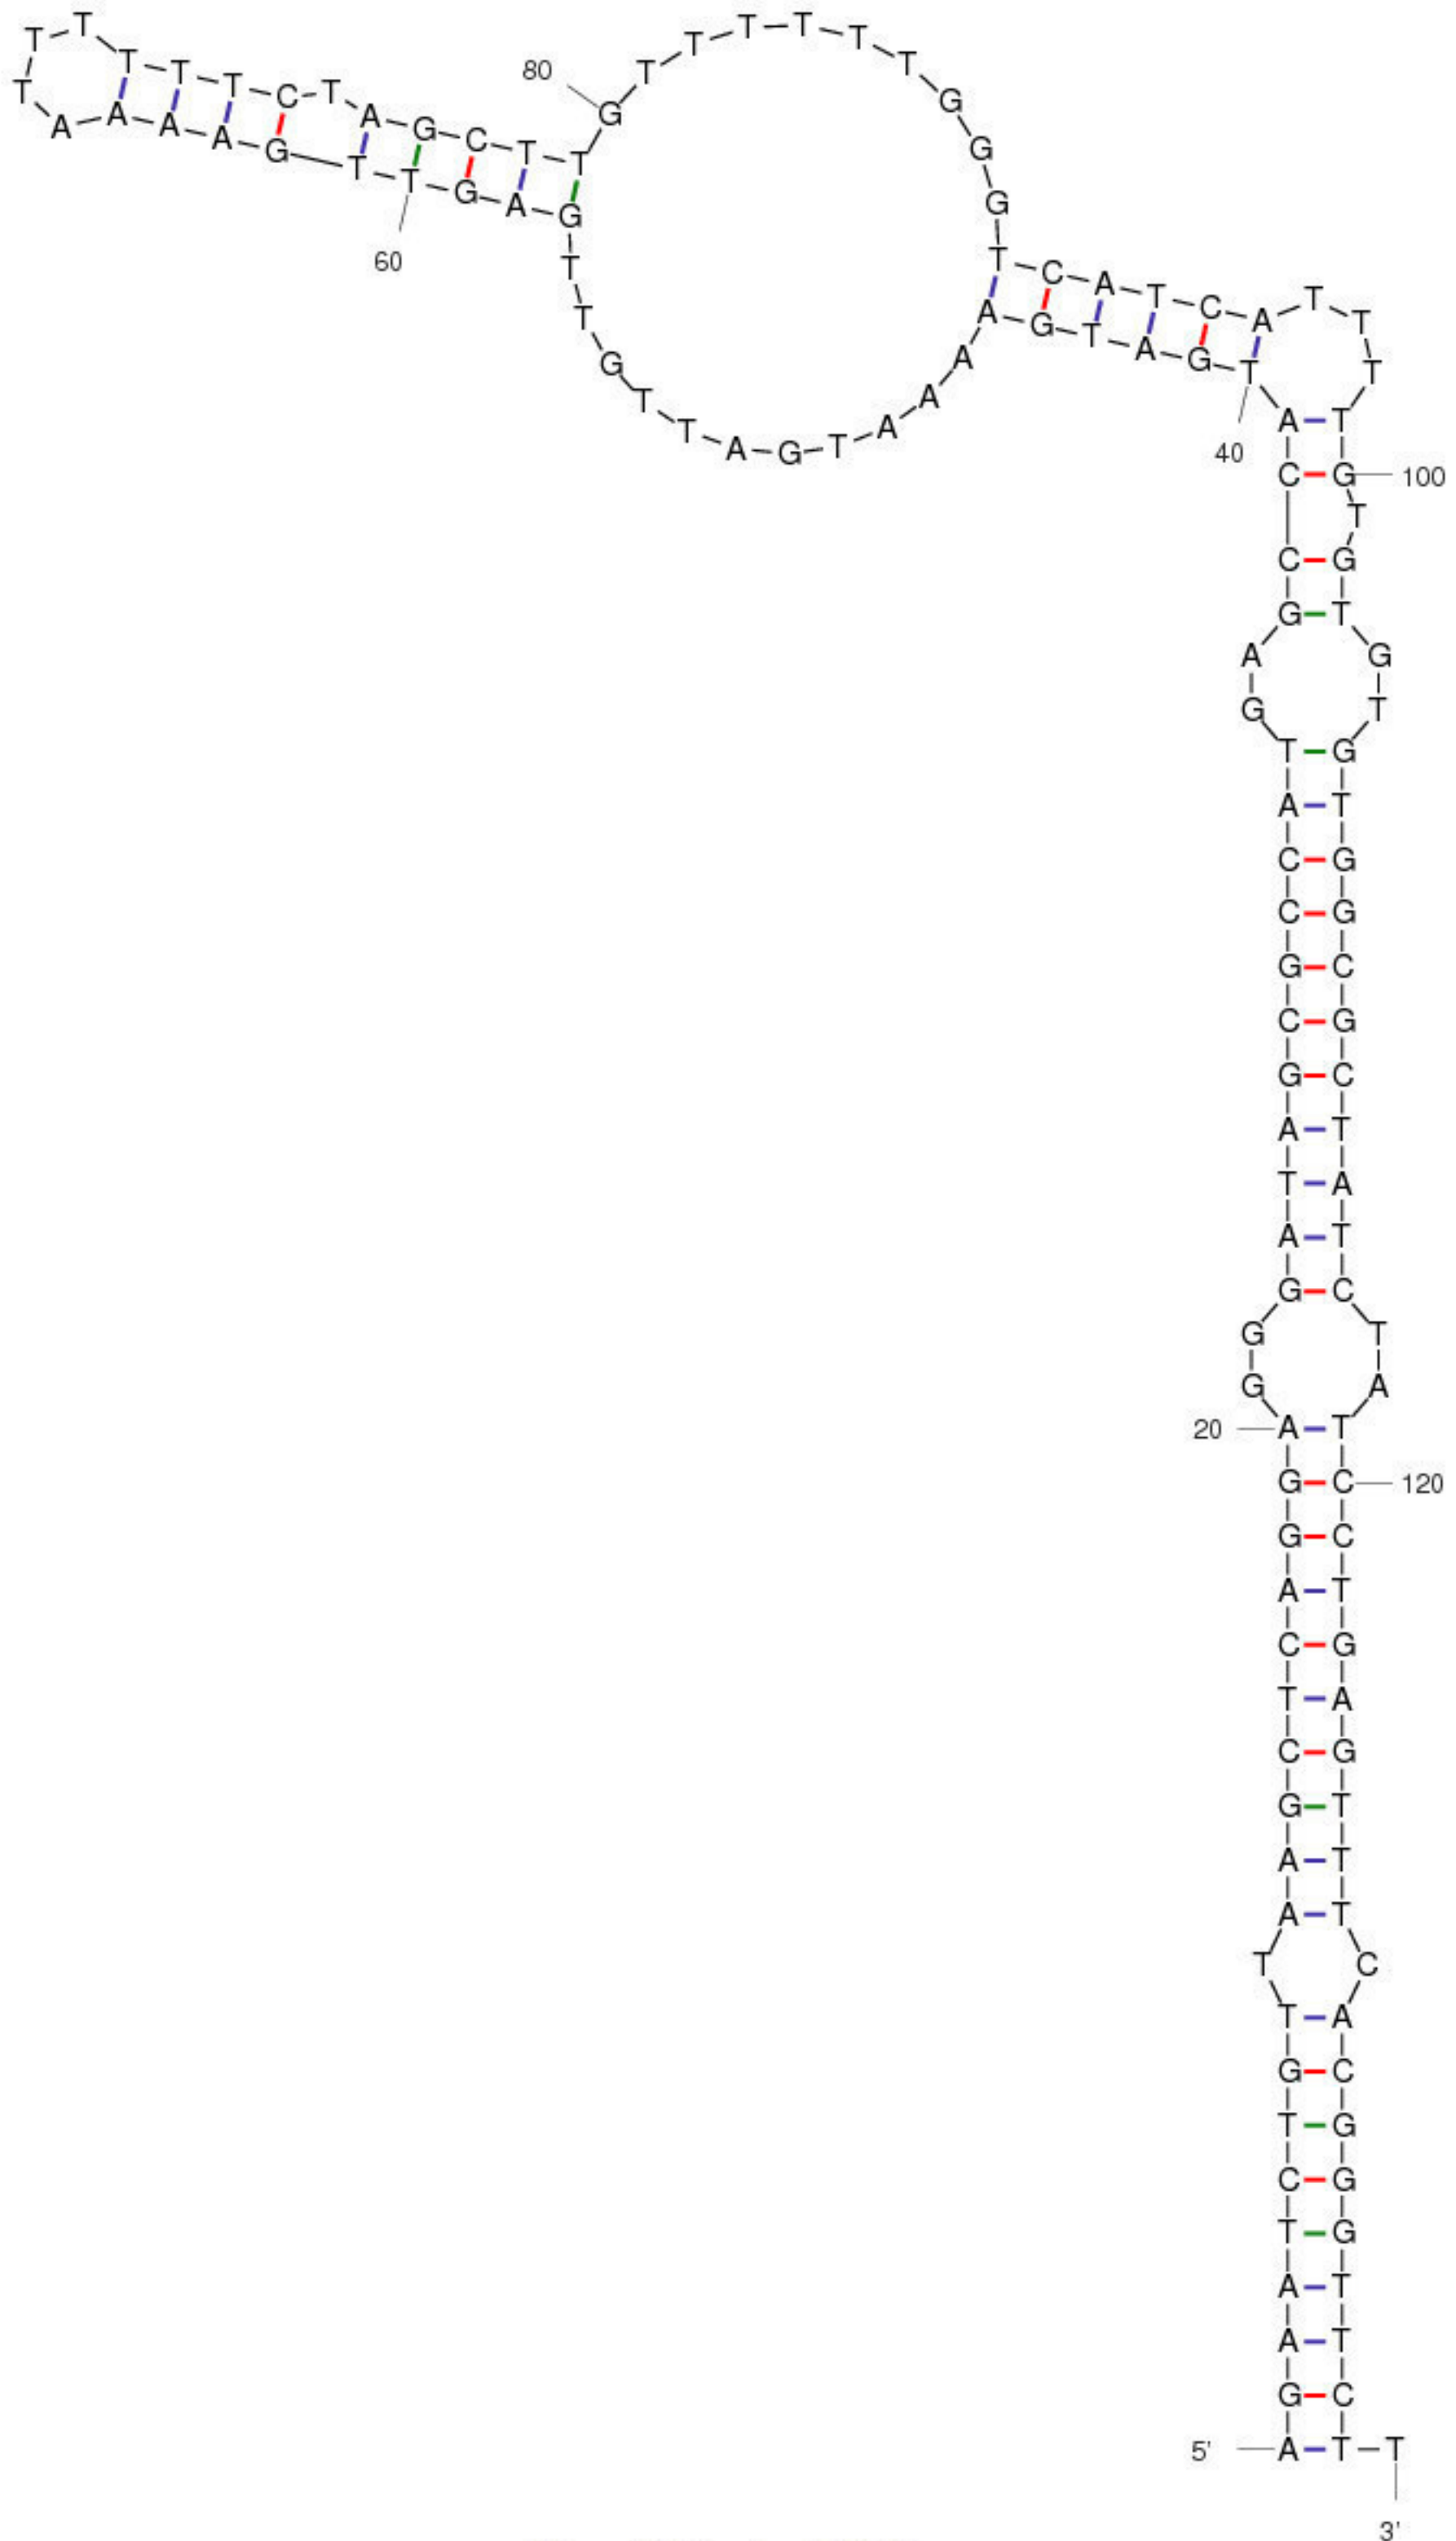

dG = -60.9 vvi-miR390



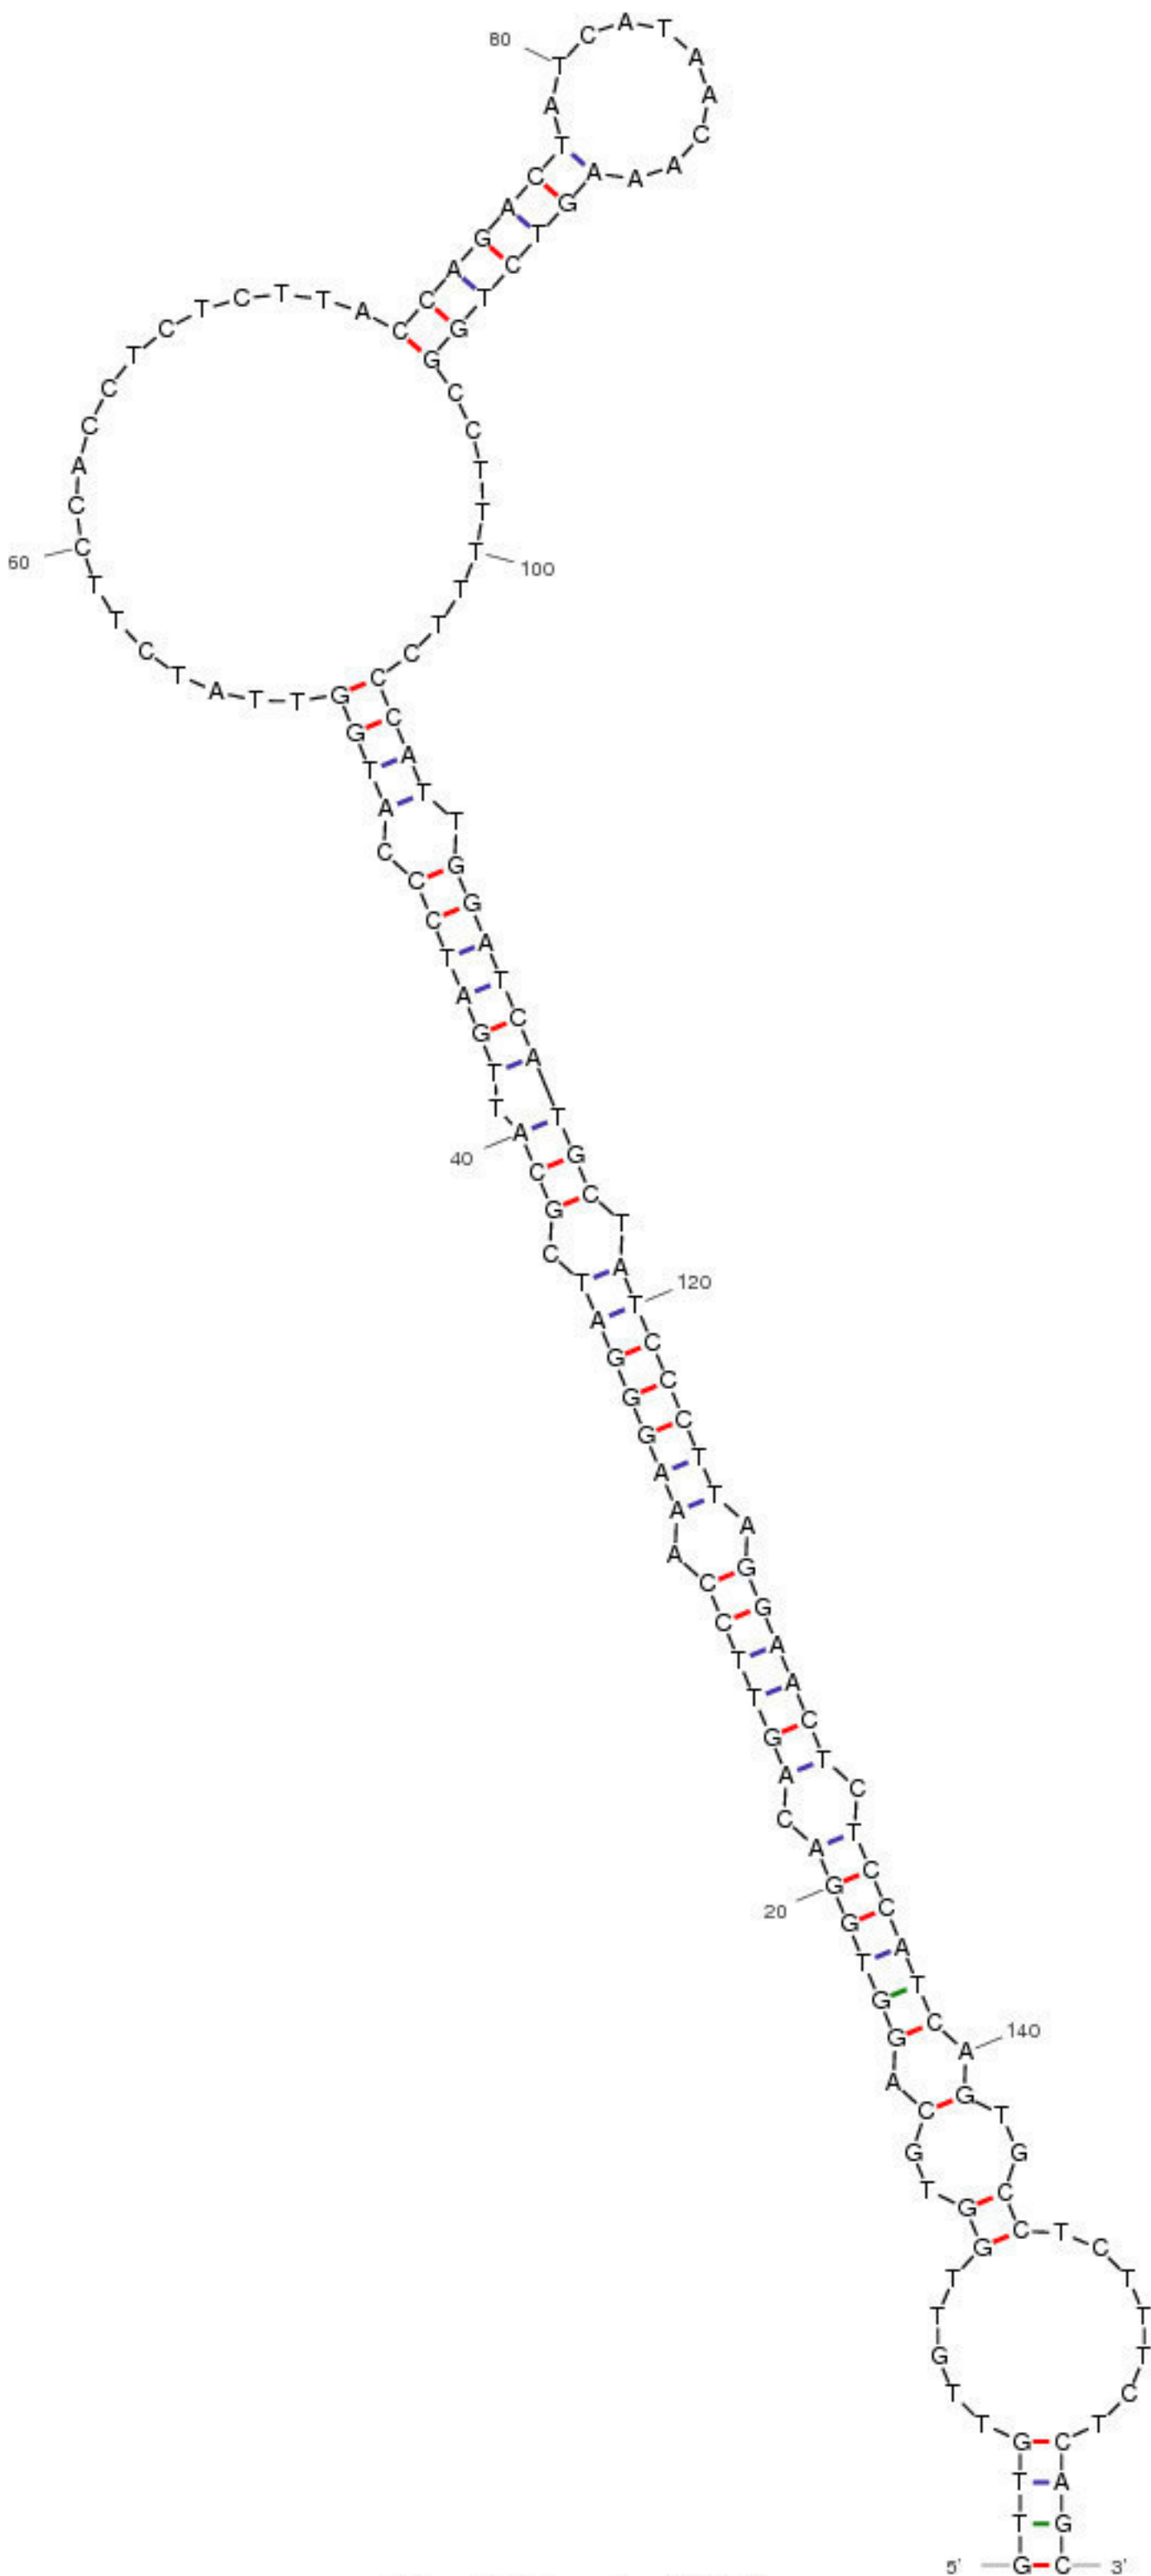

$dG = -61.9$  vvi-miR393a

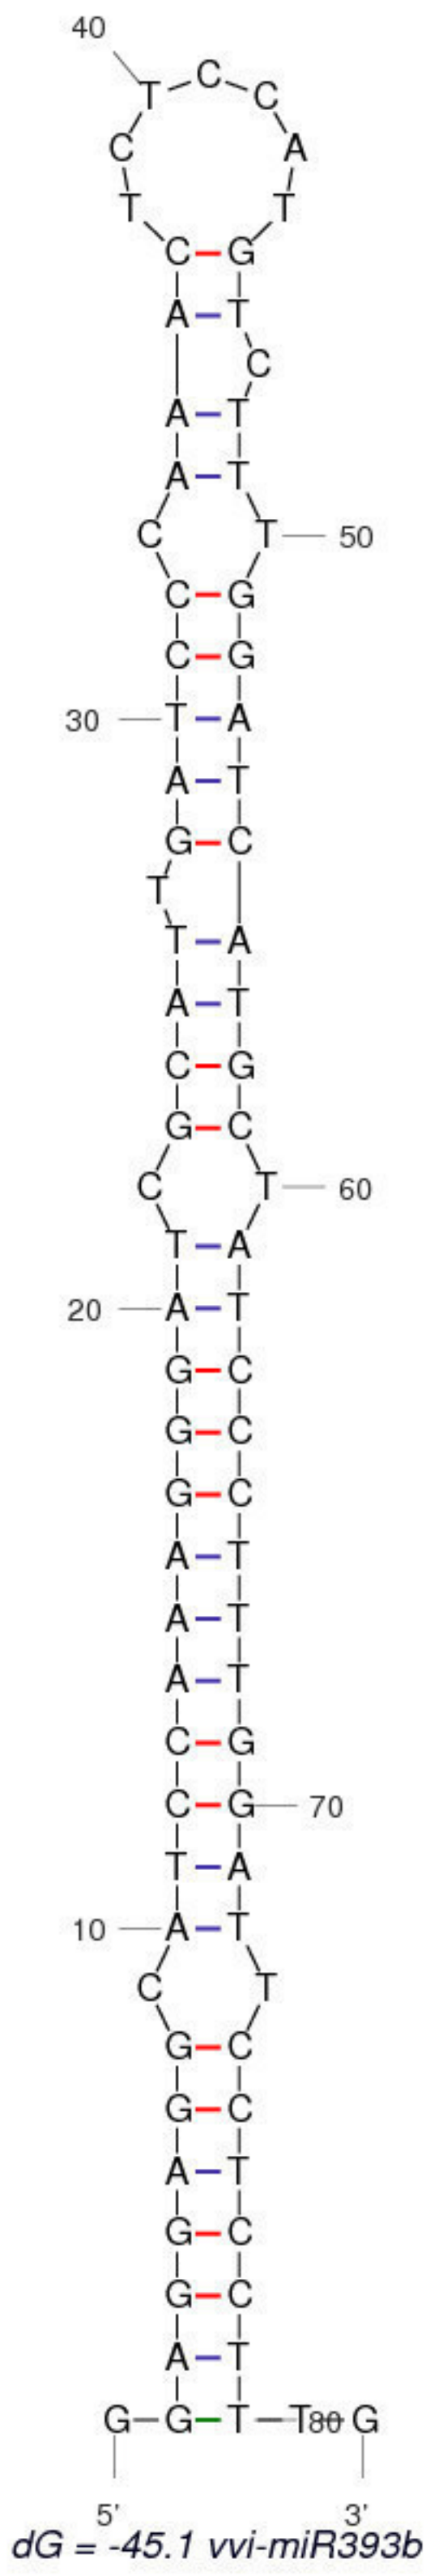

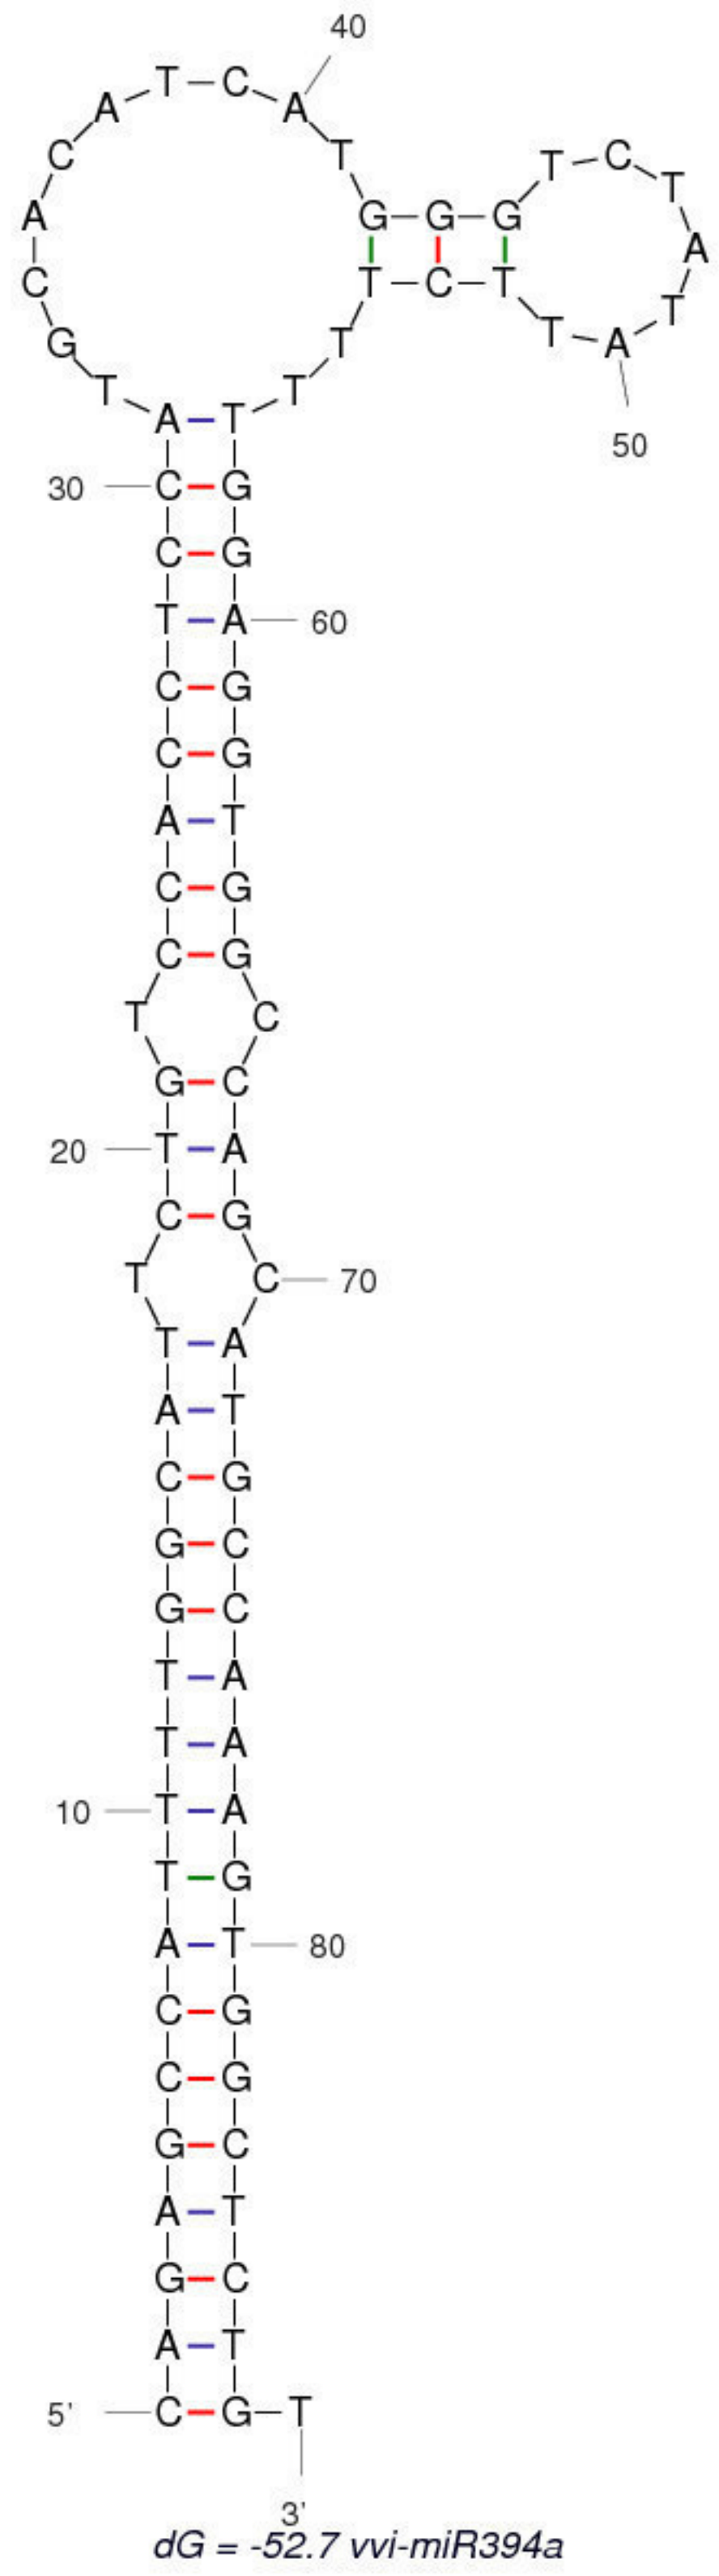

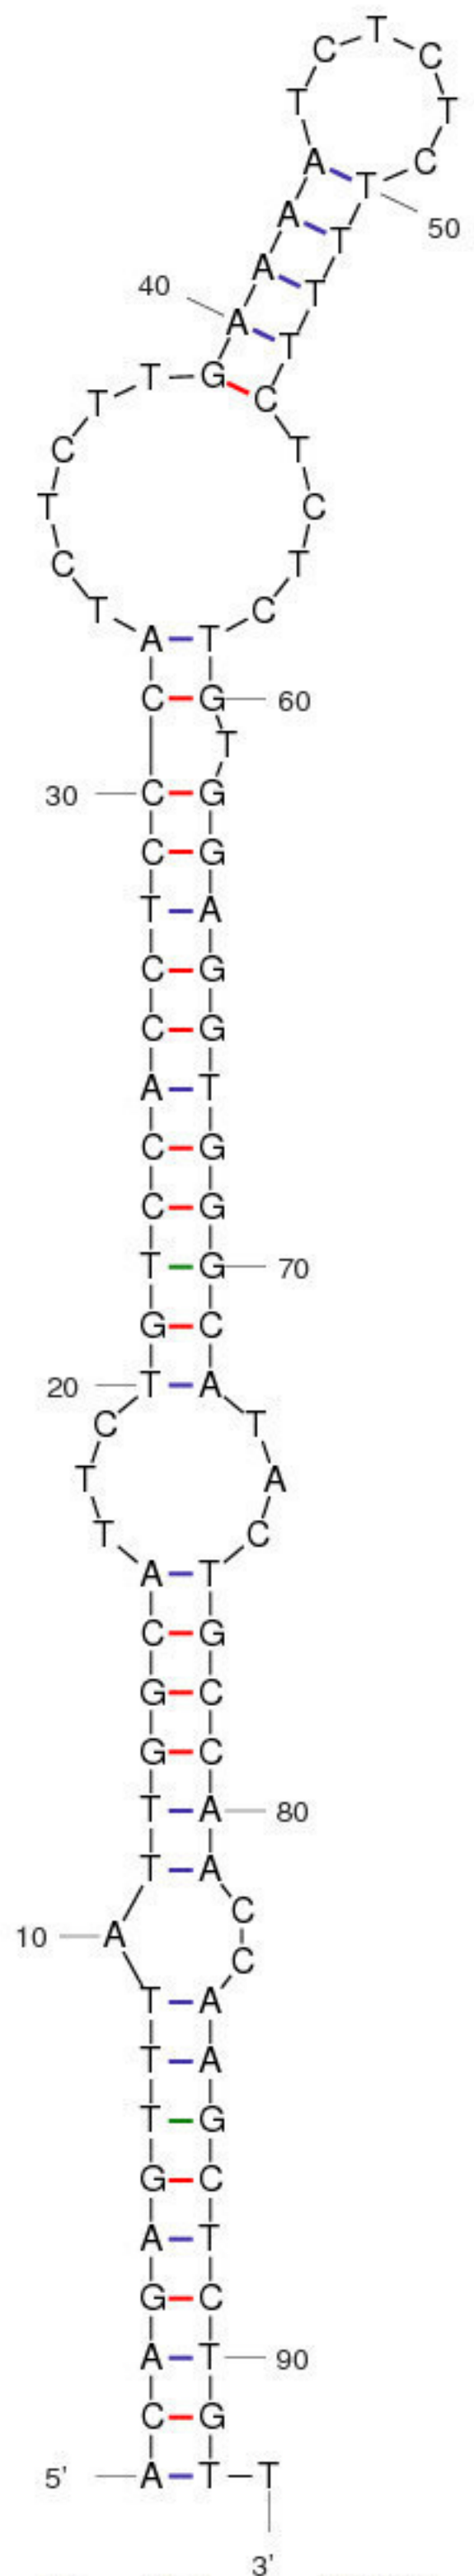

dG = -42.6 vvi-miR394b

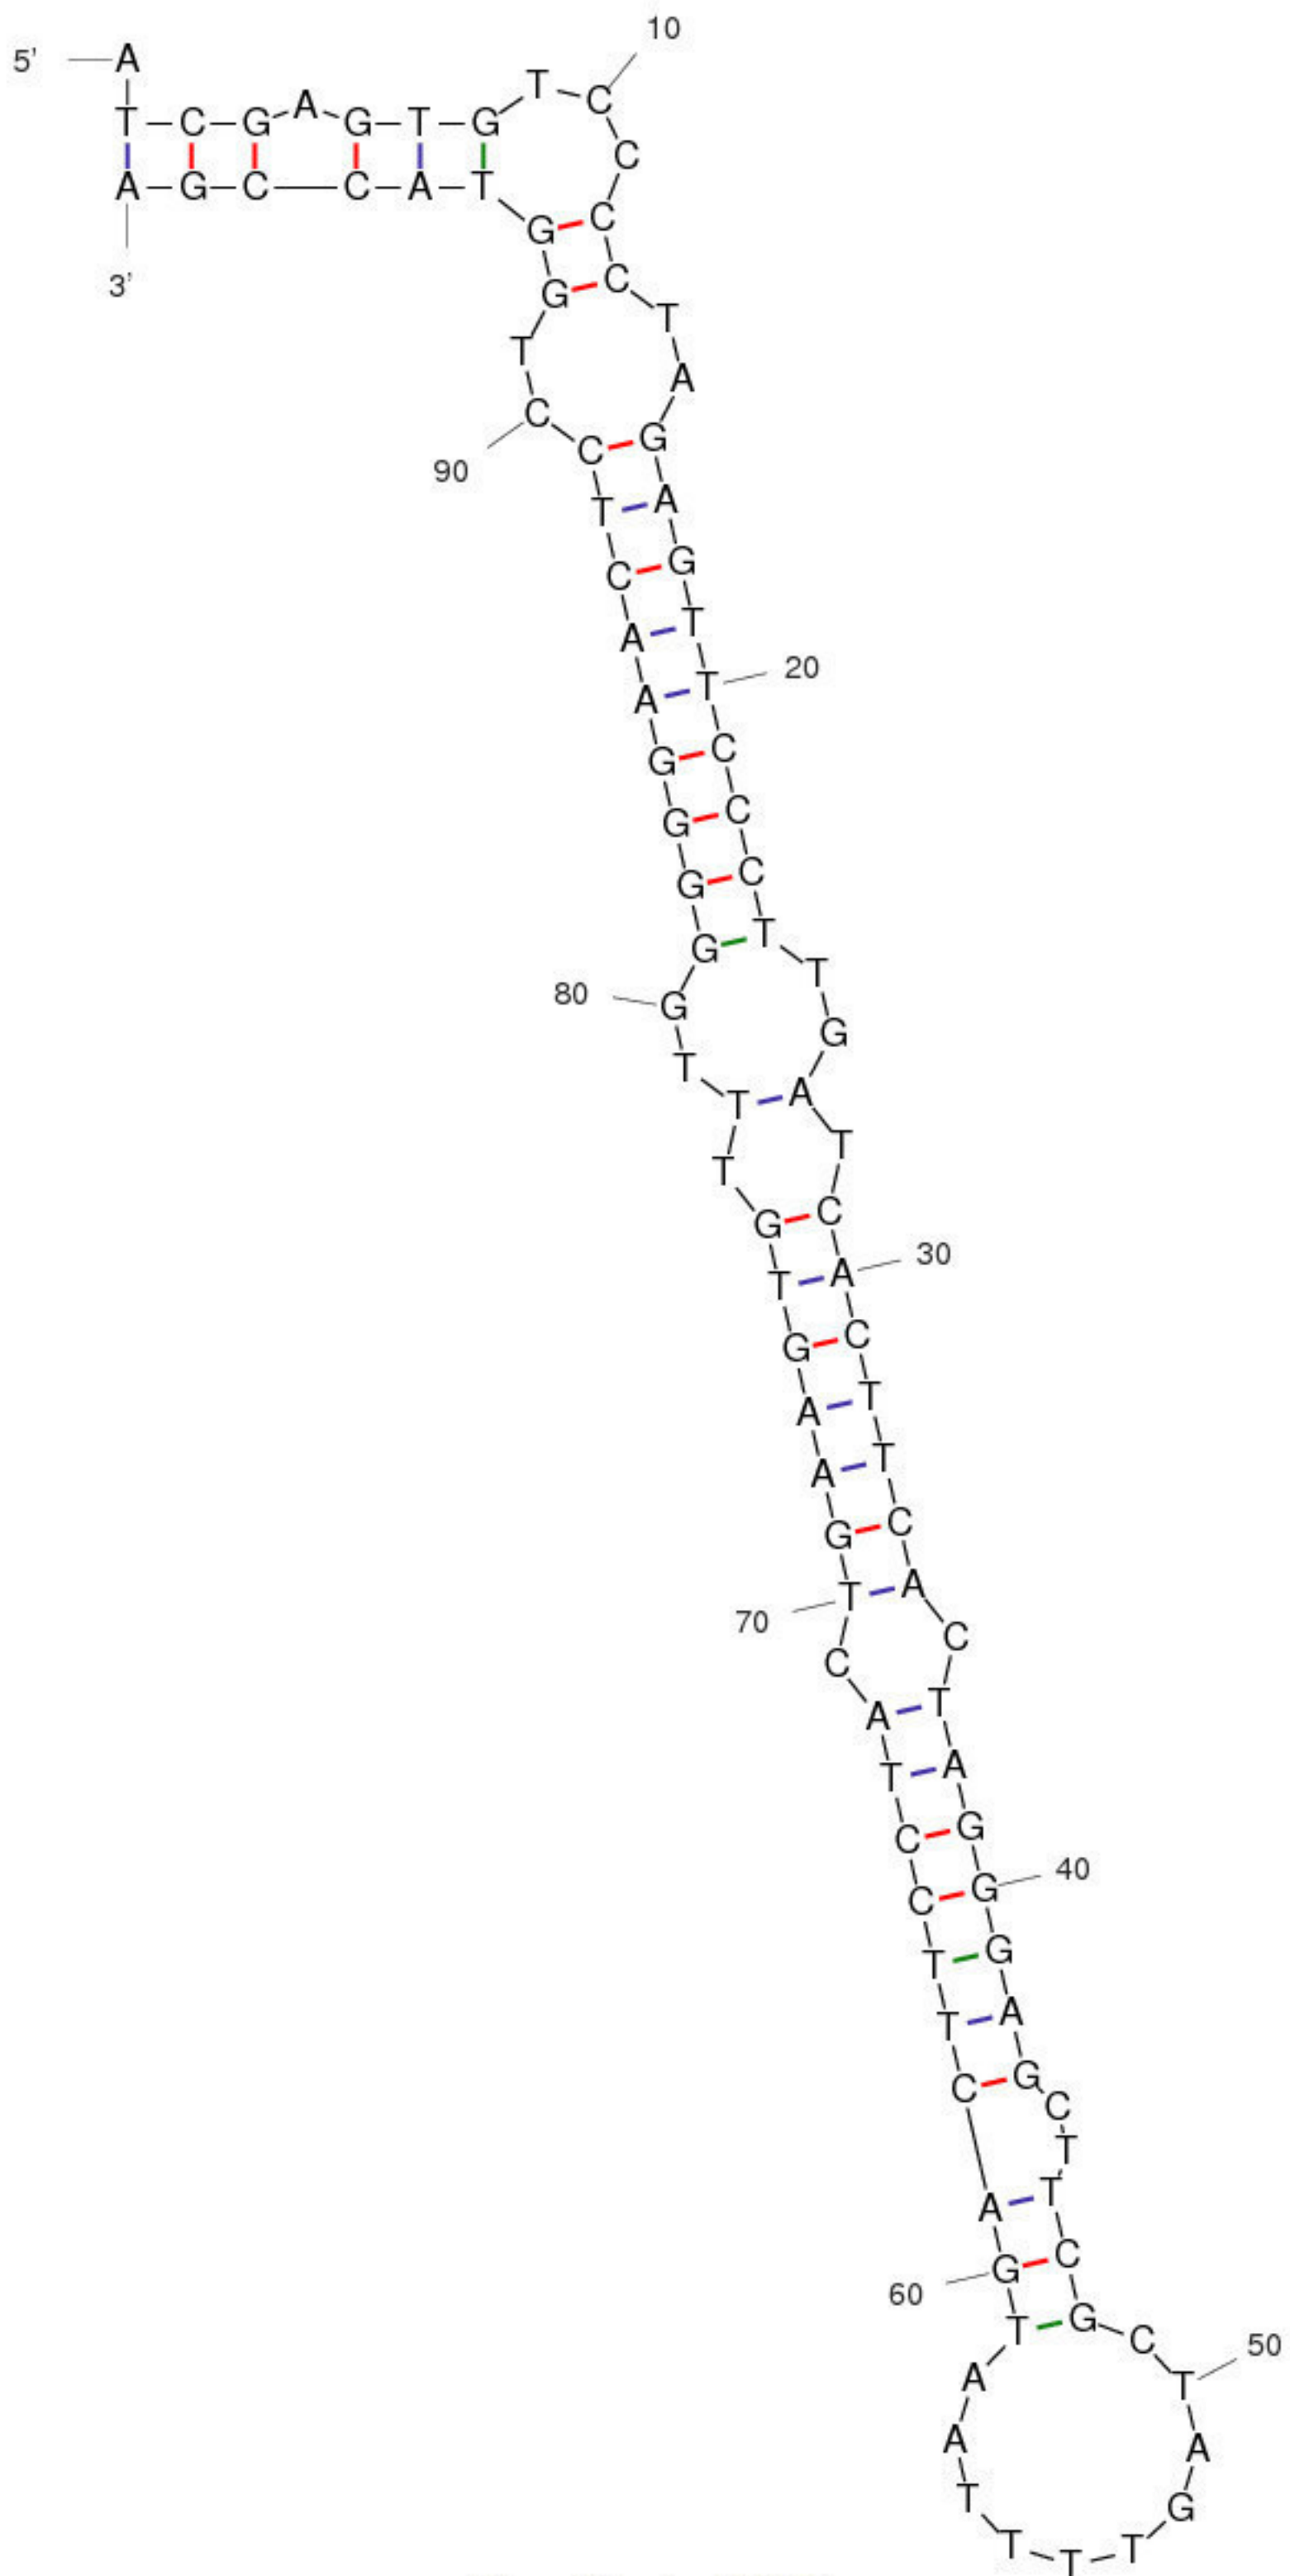

dG = -43 vvi-miR395a

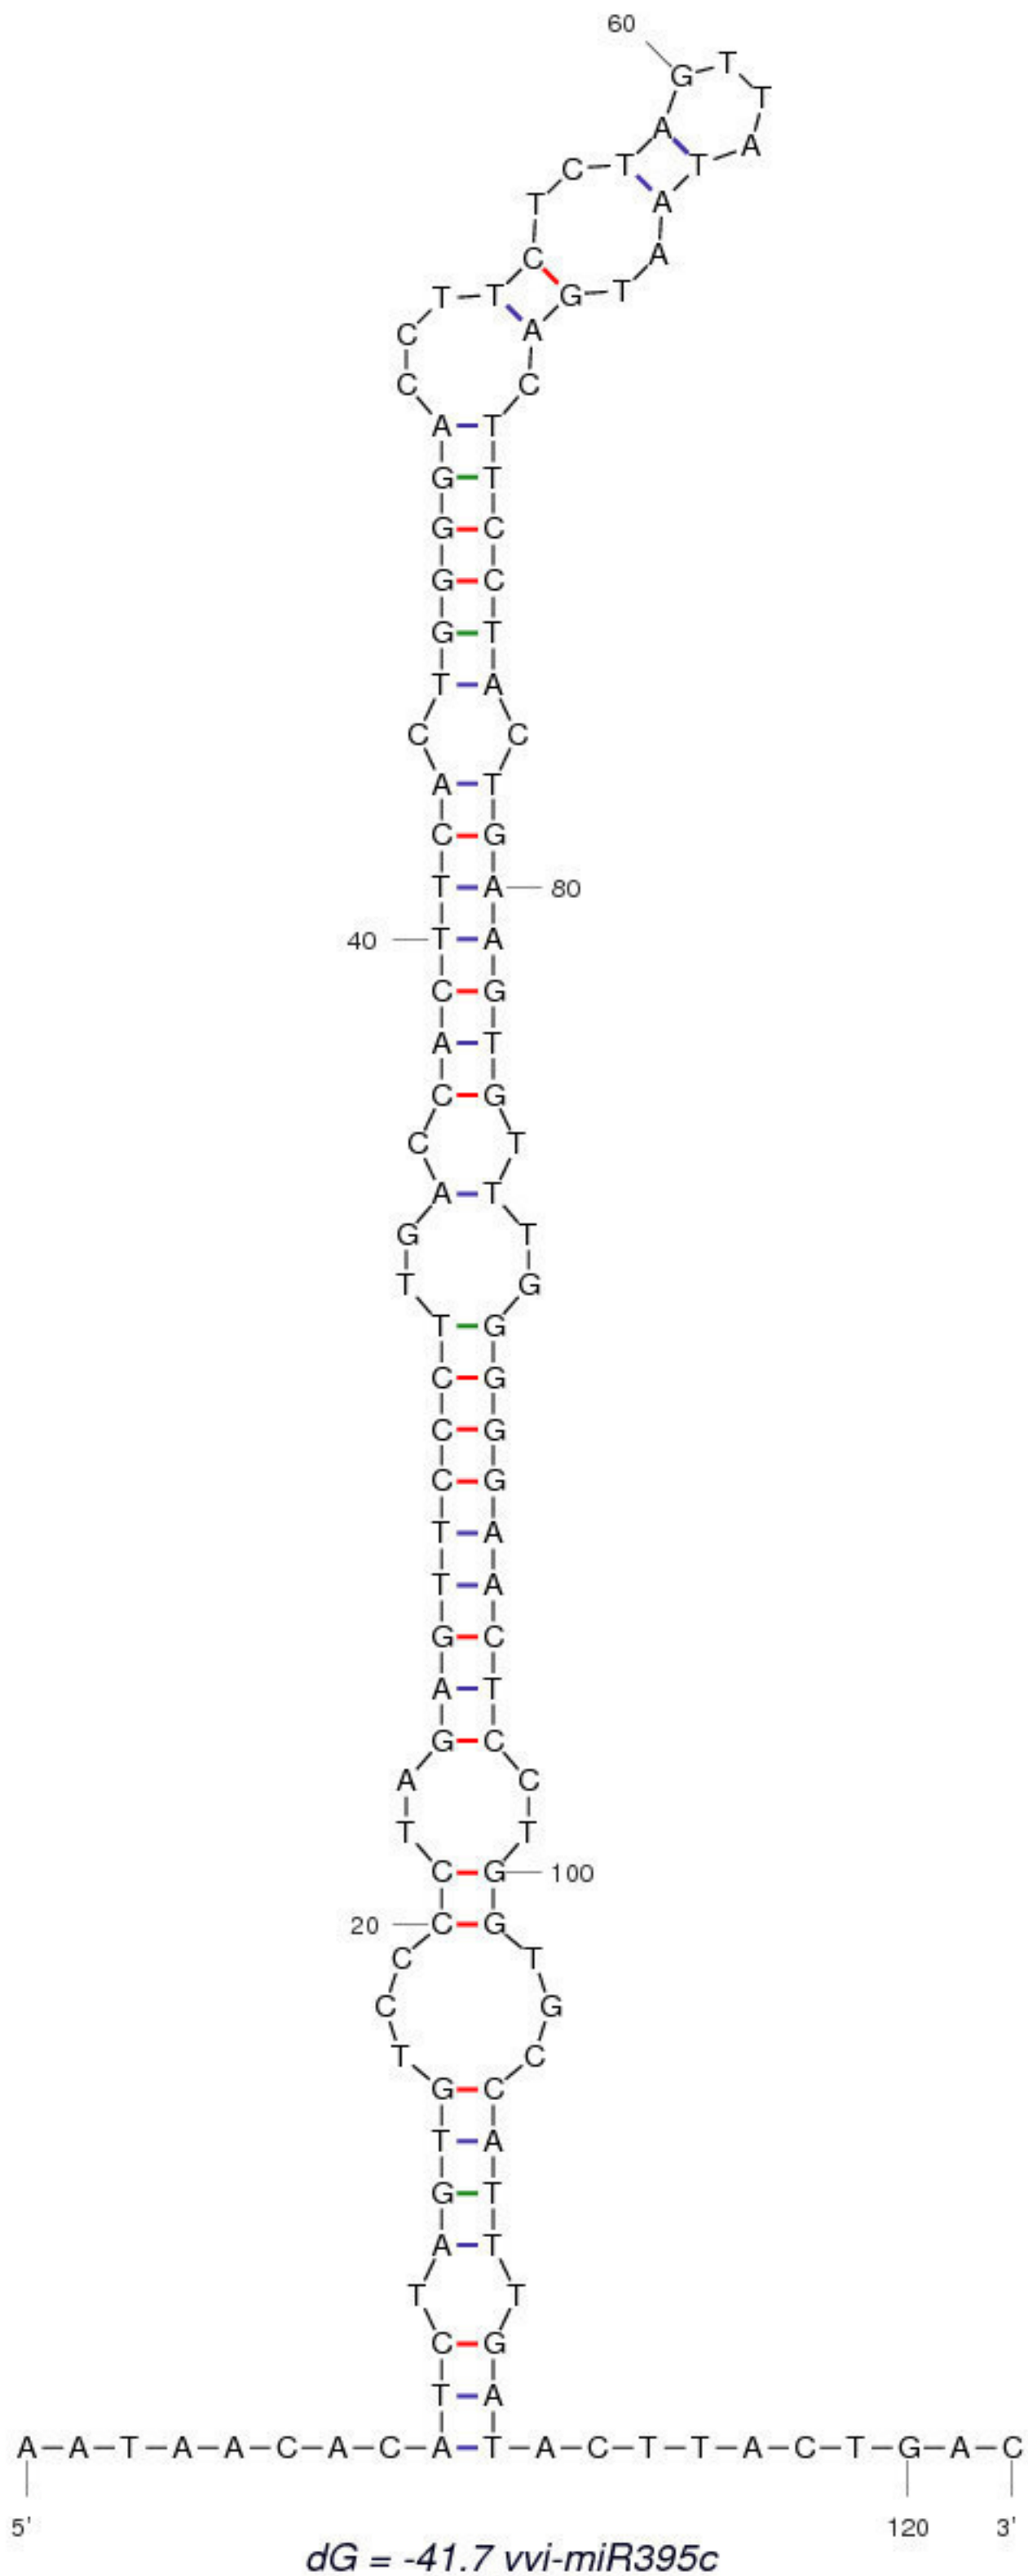

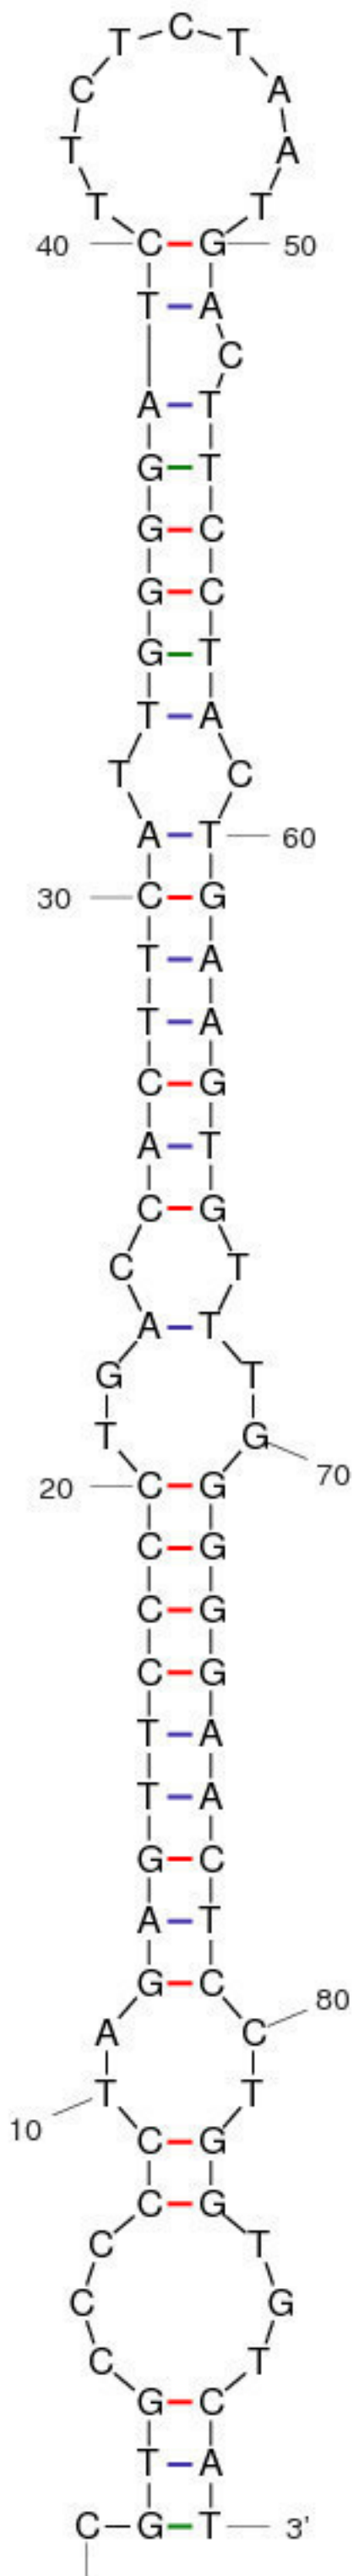

$dG = -41.2$  vvi-miR395d

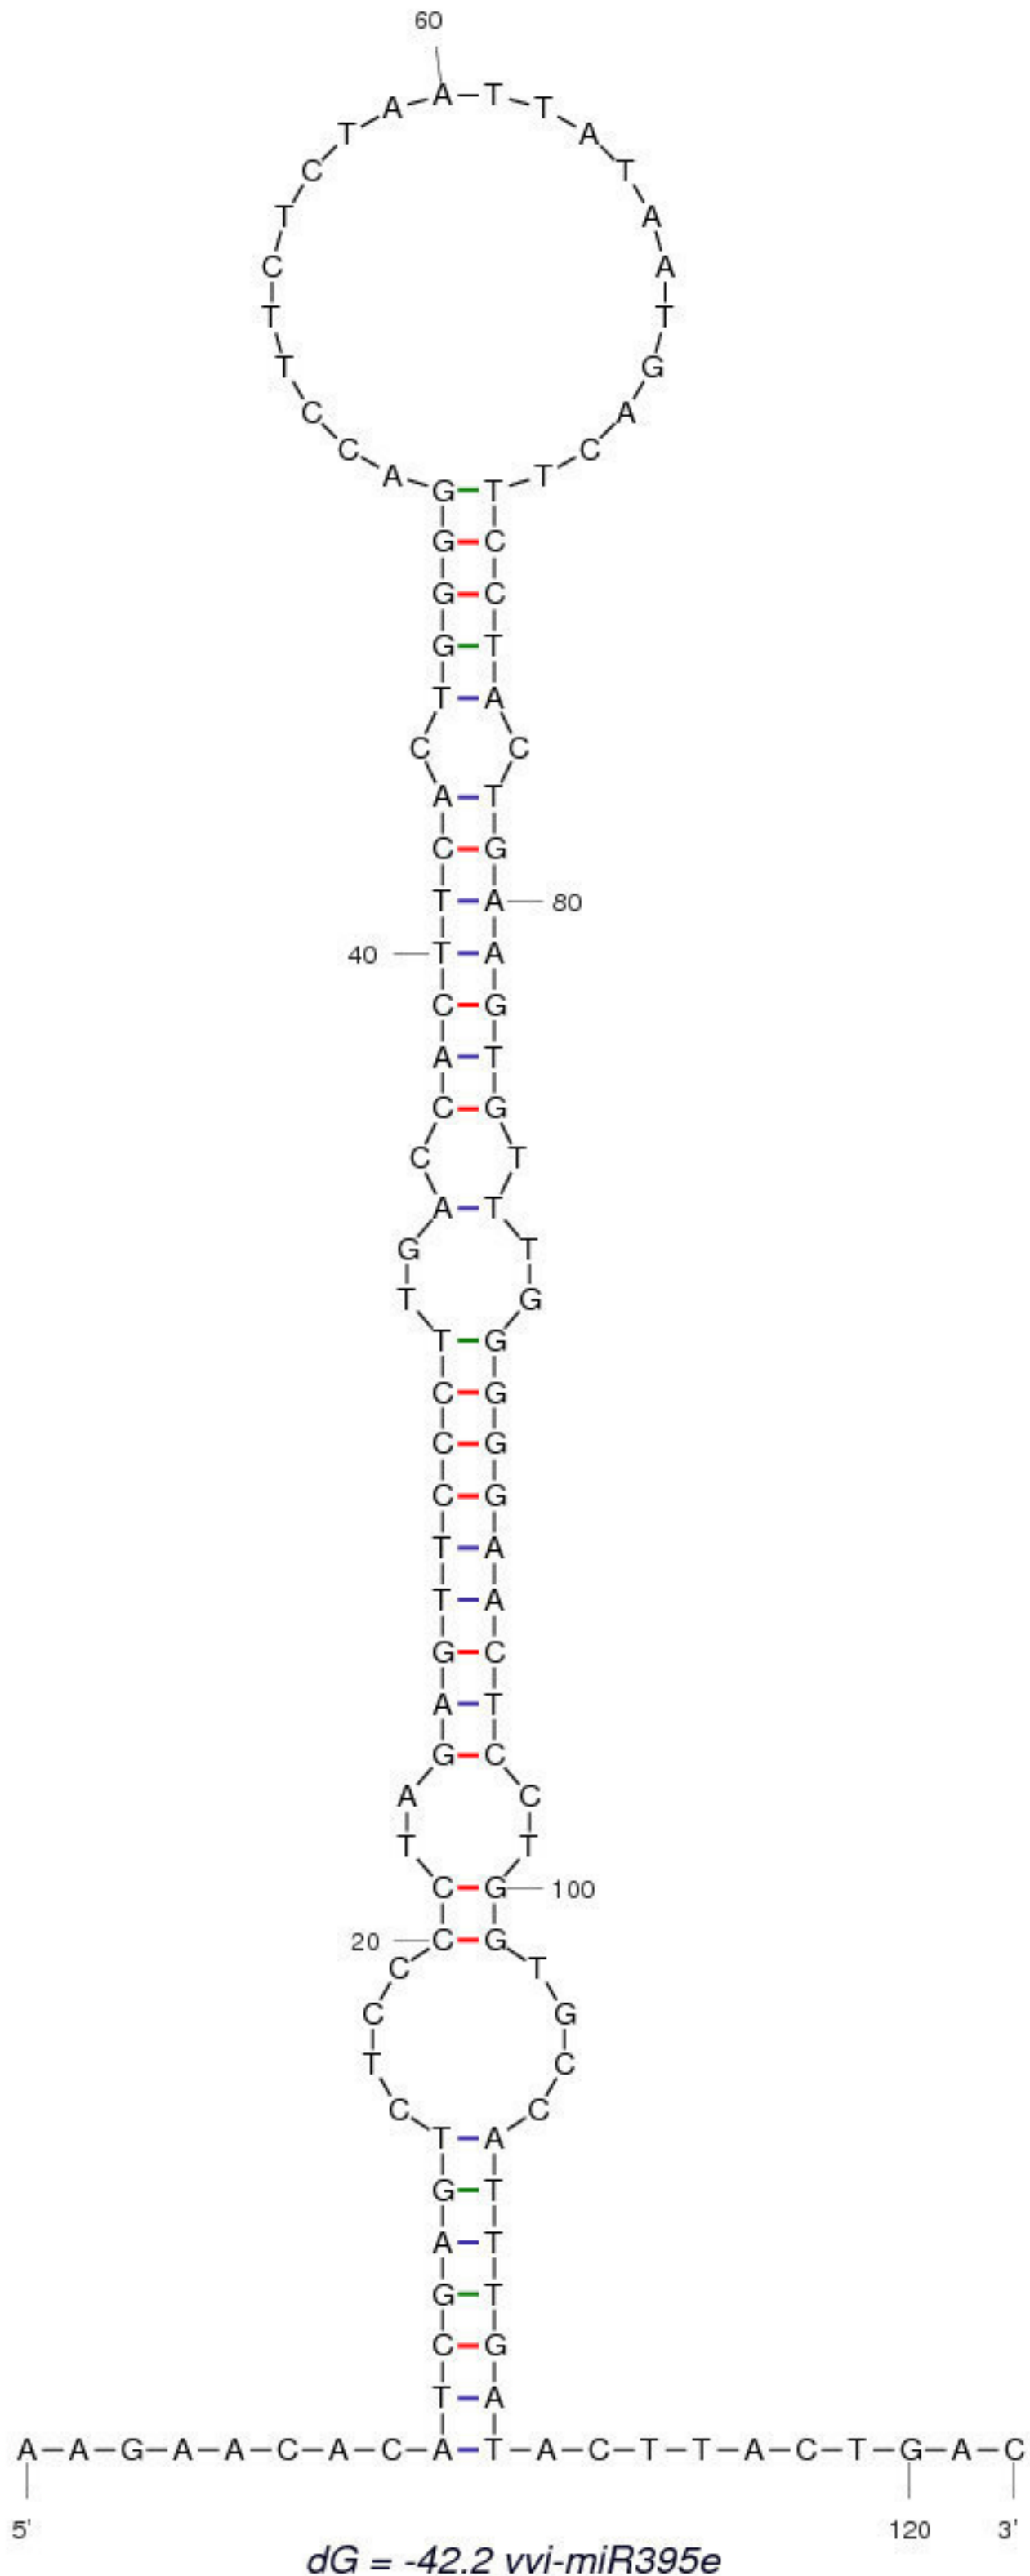



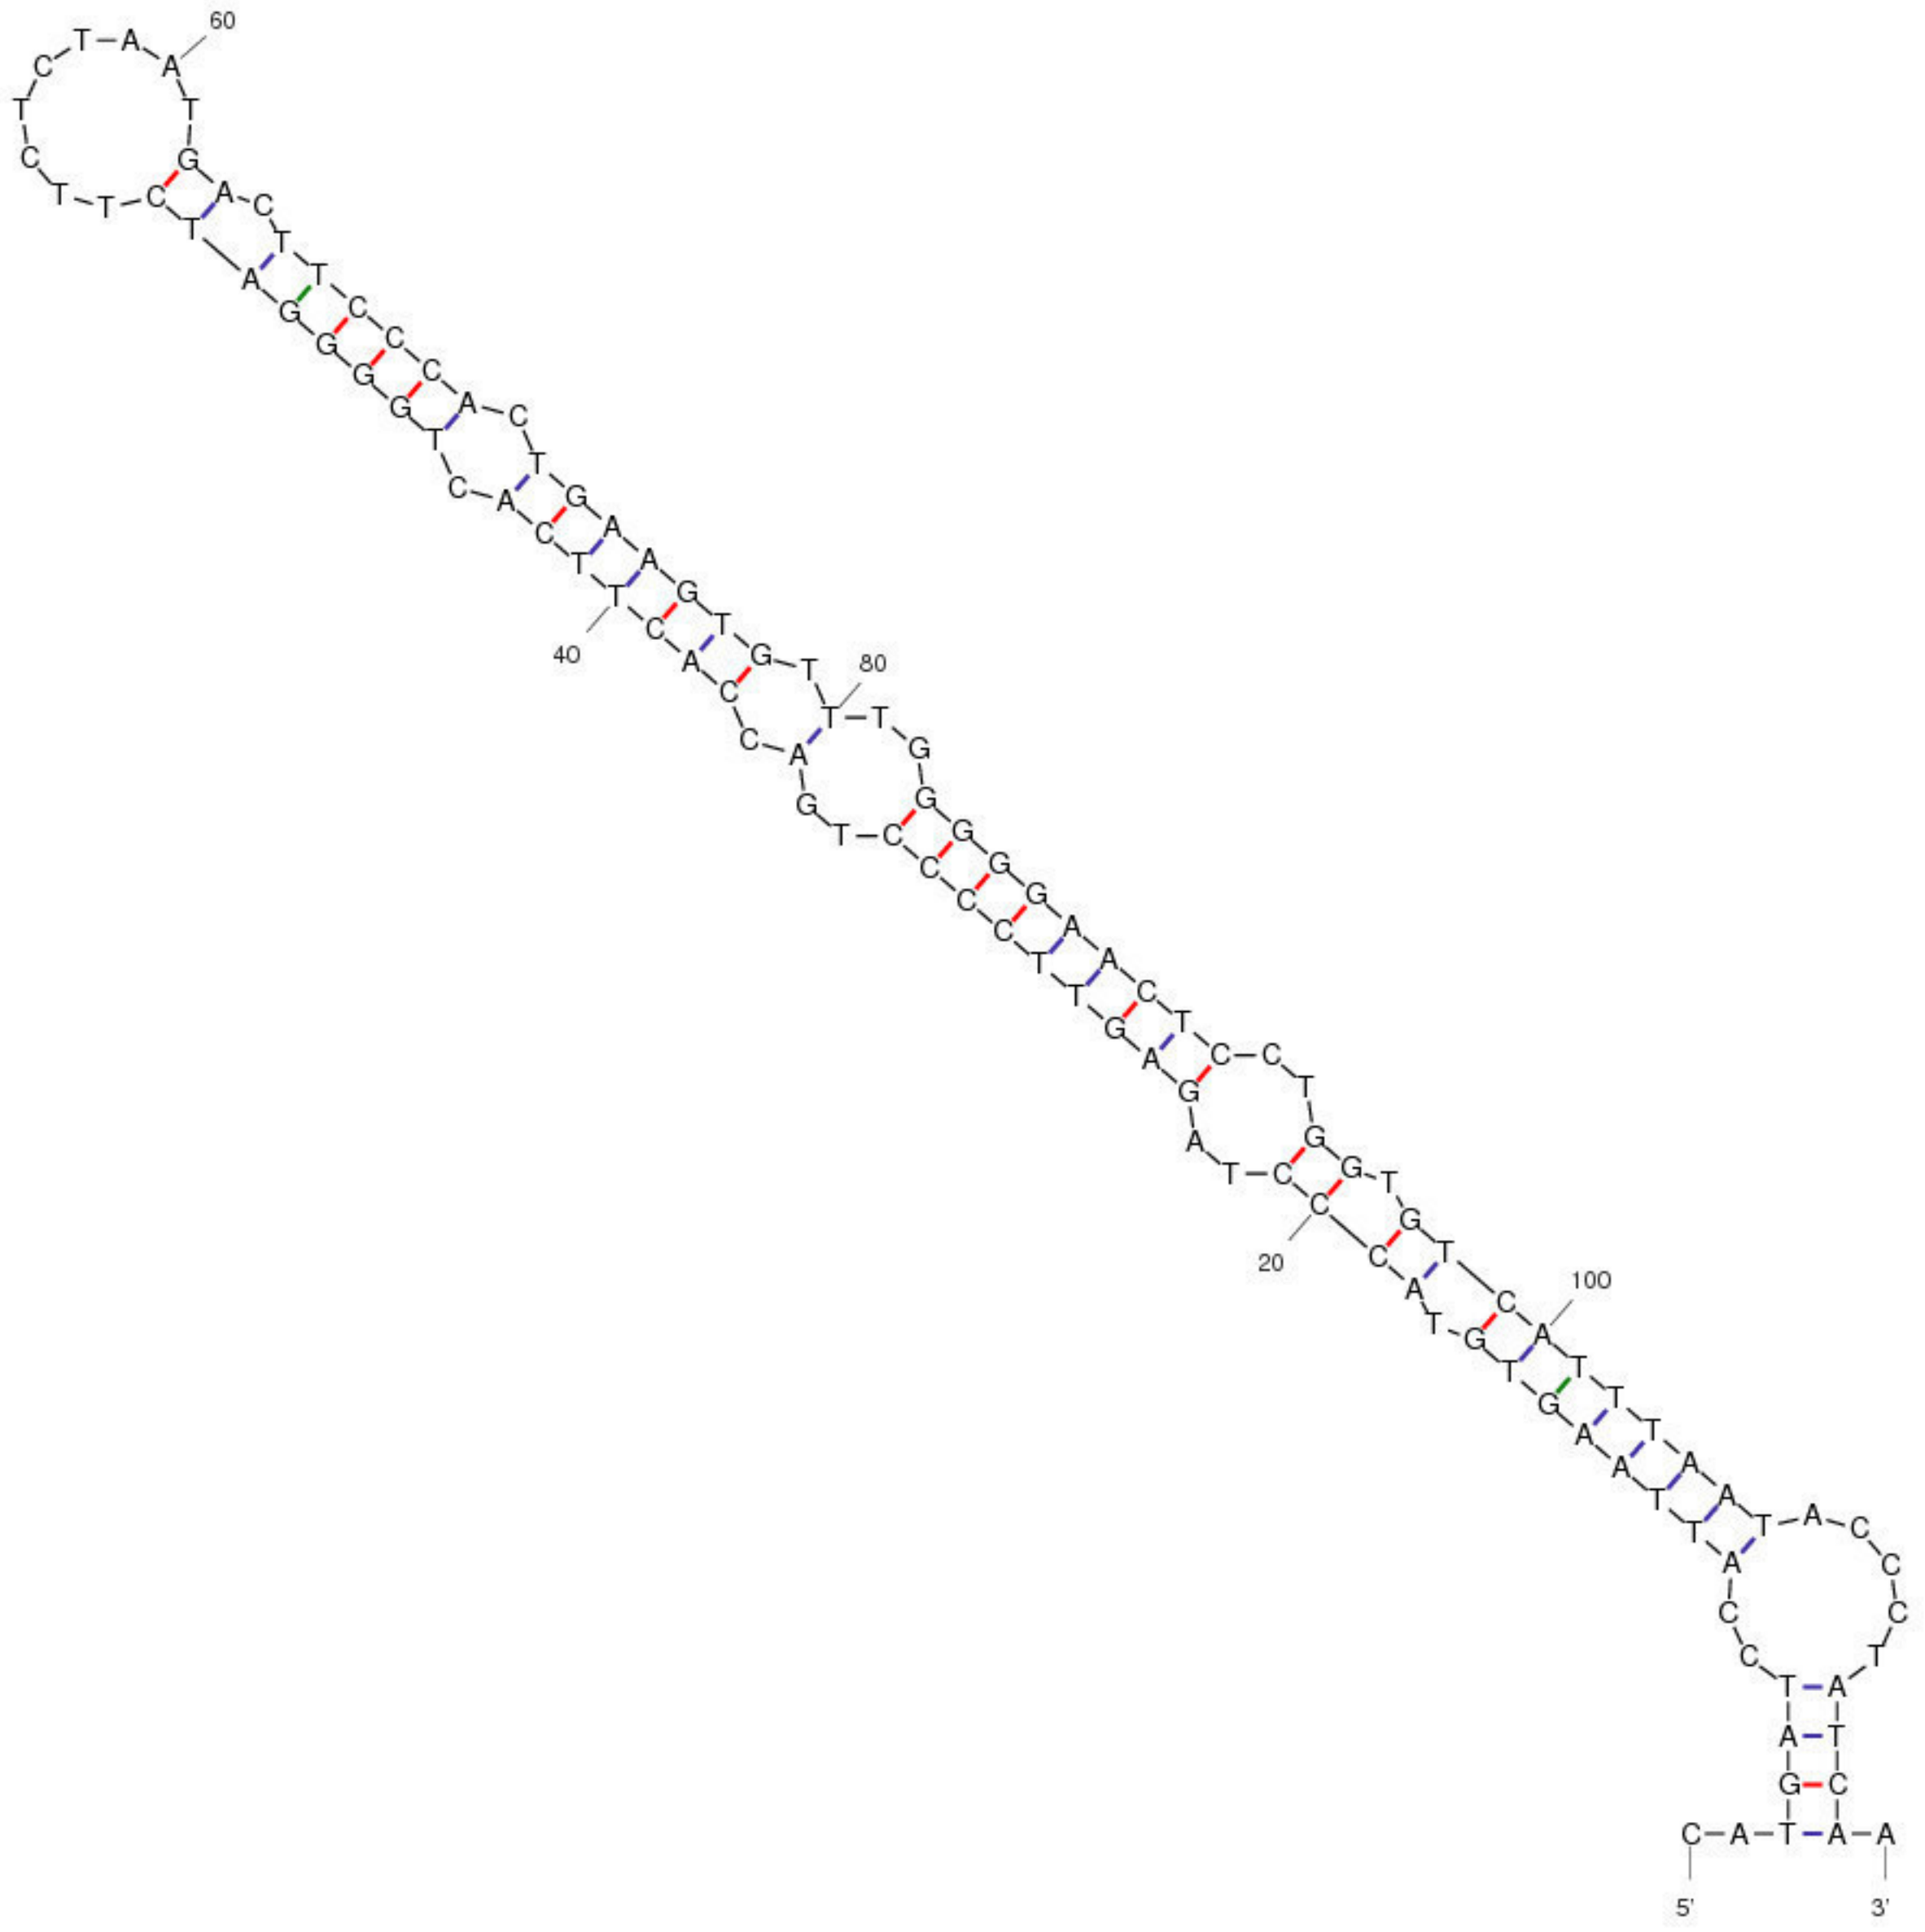

$dG = -51.6$  vvi-miR395f

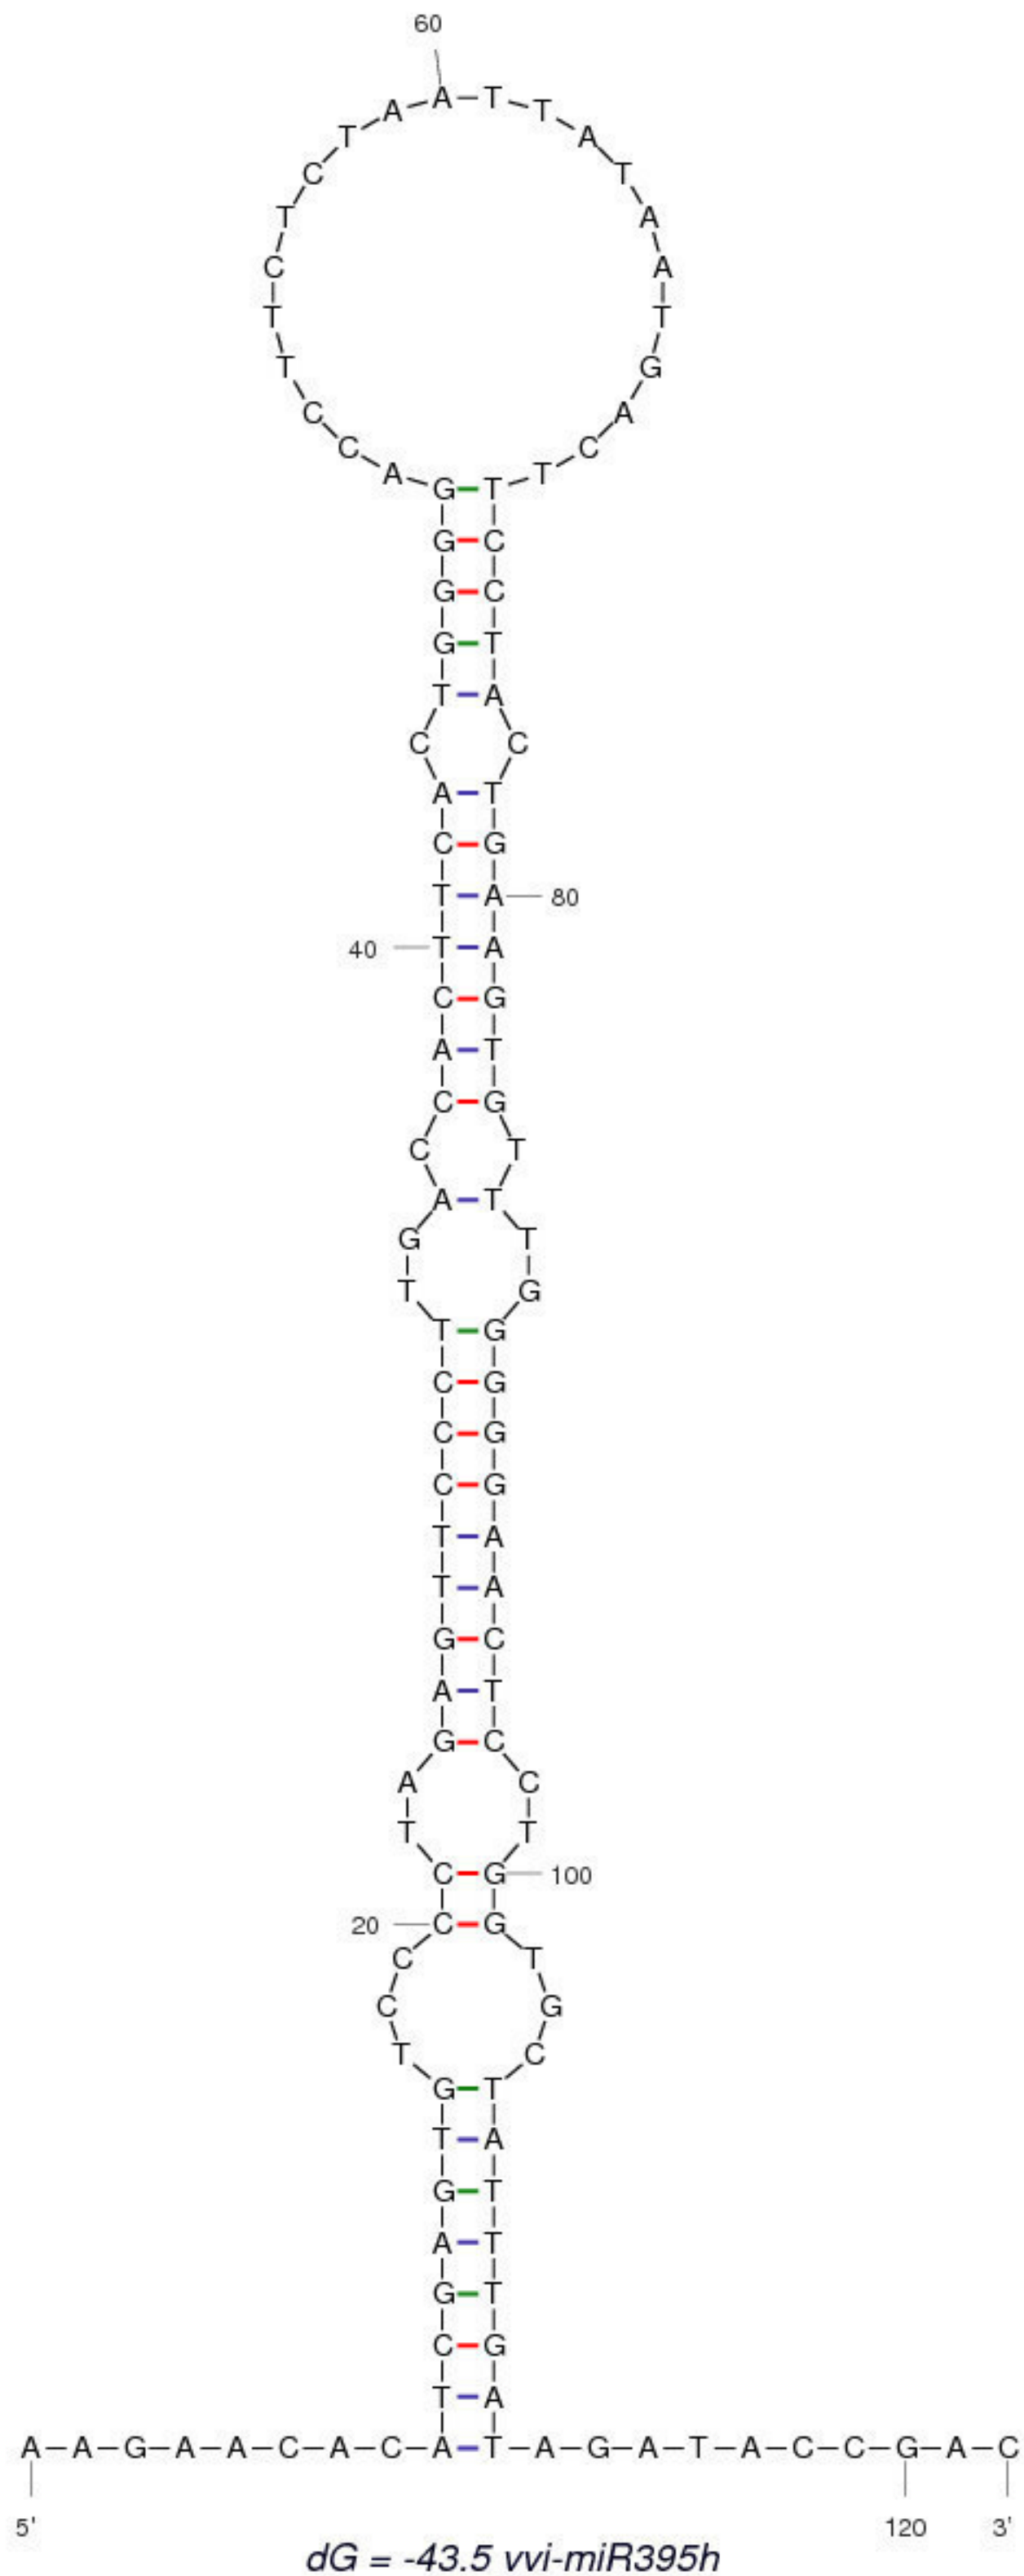

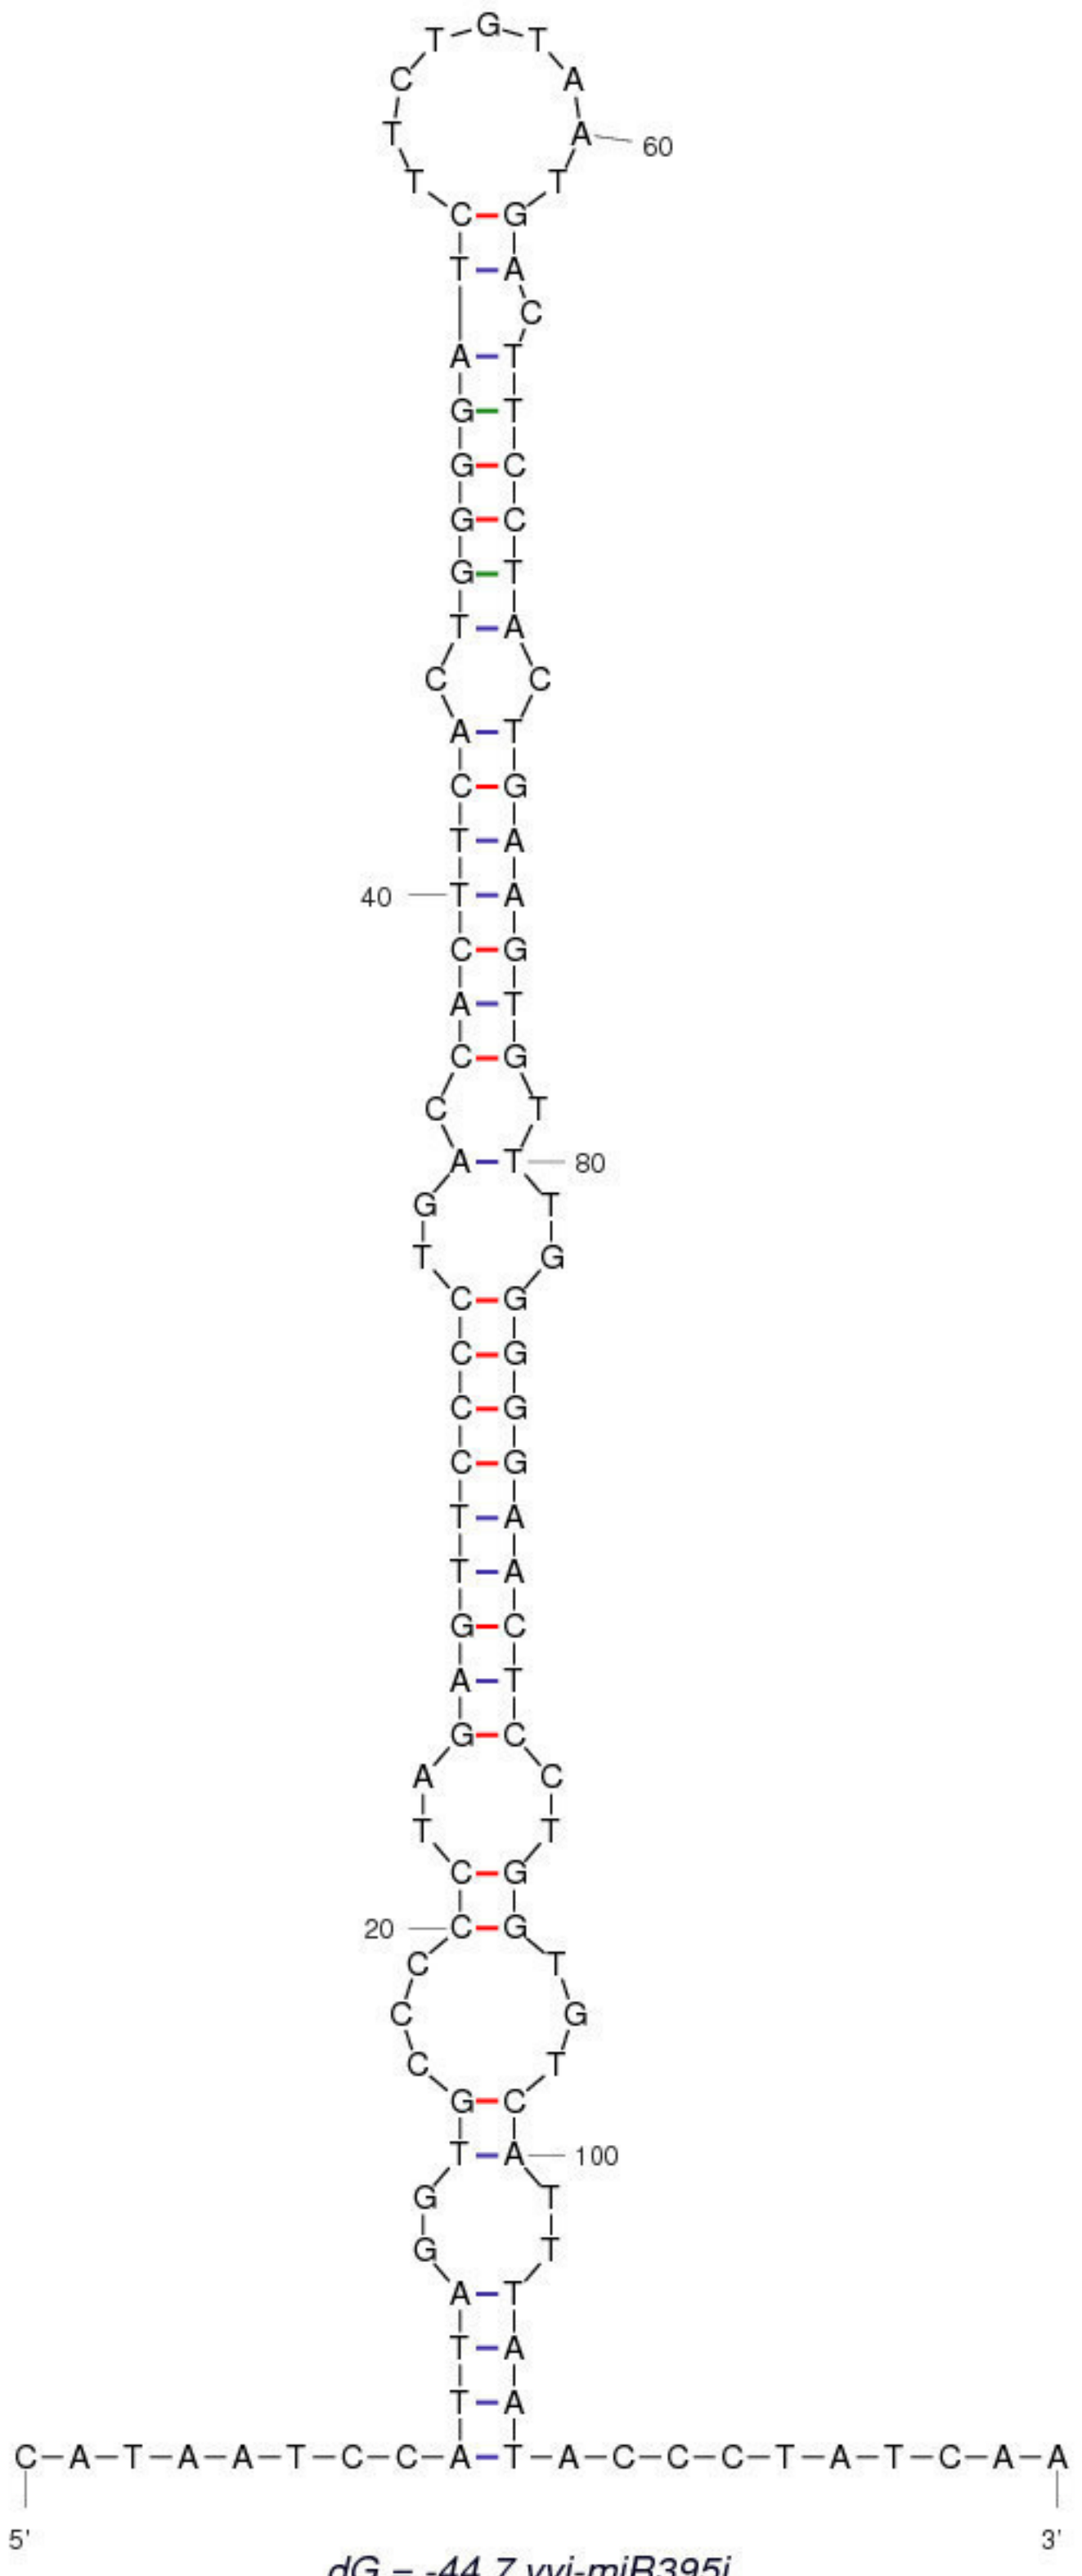

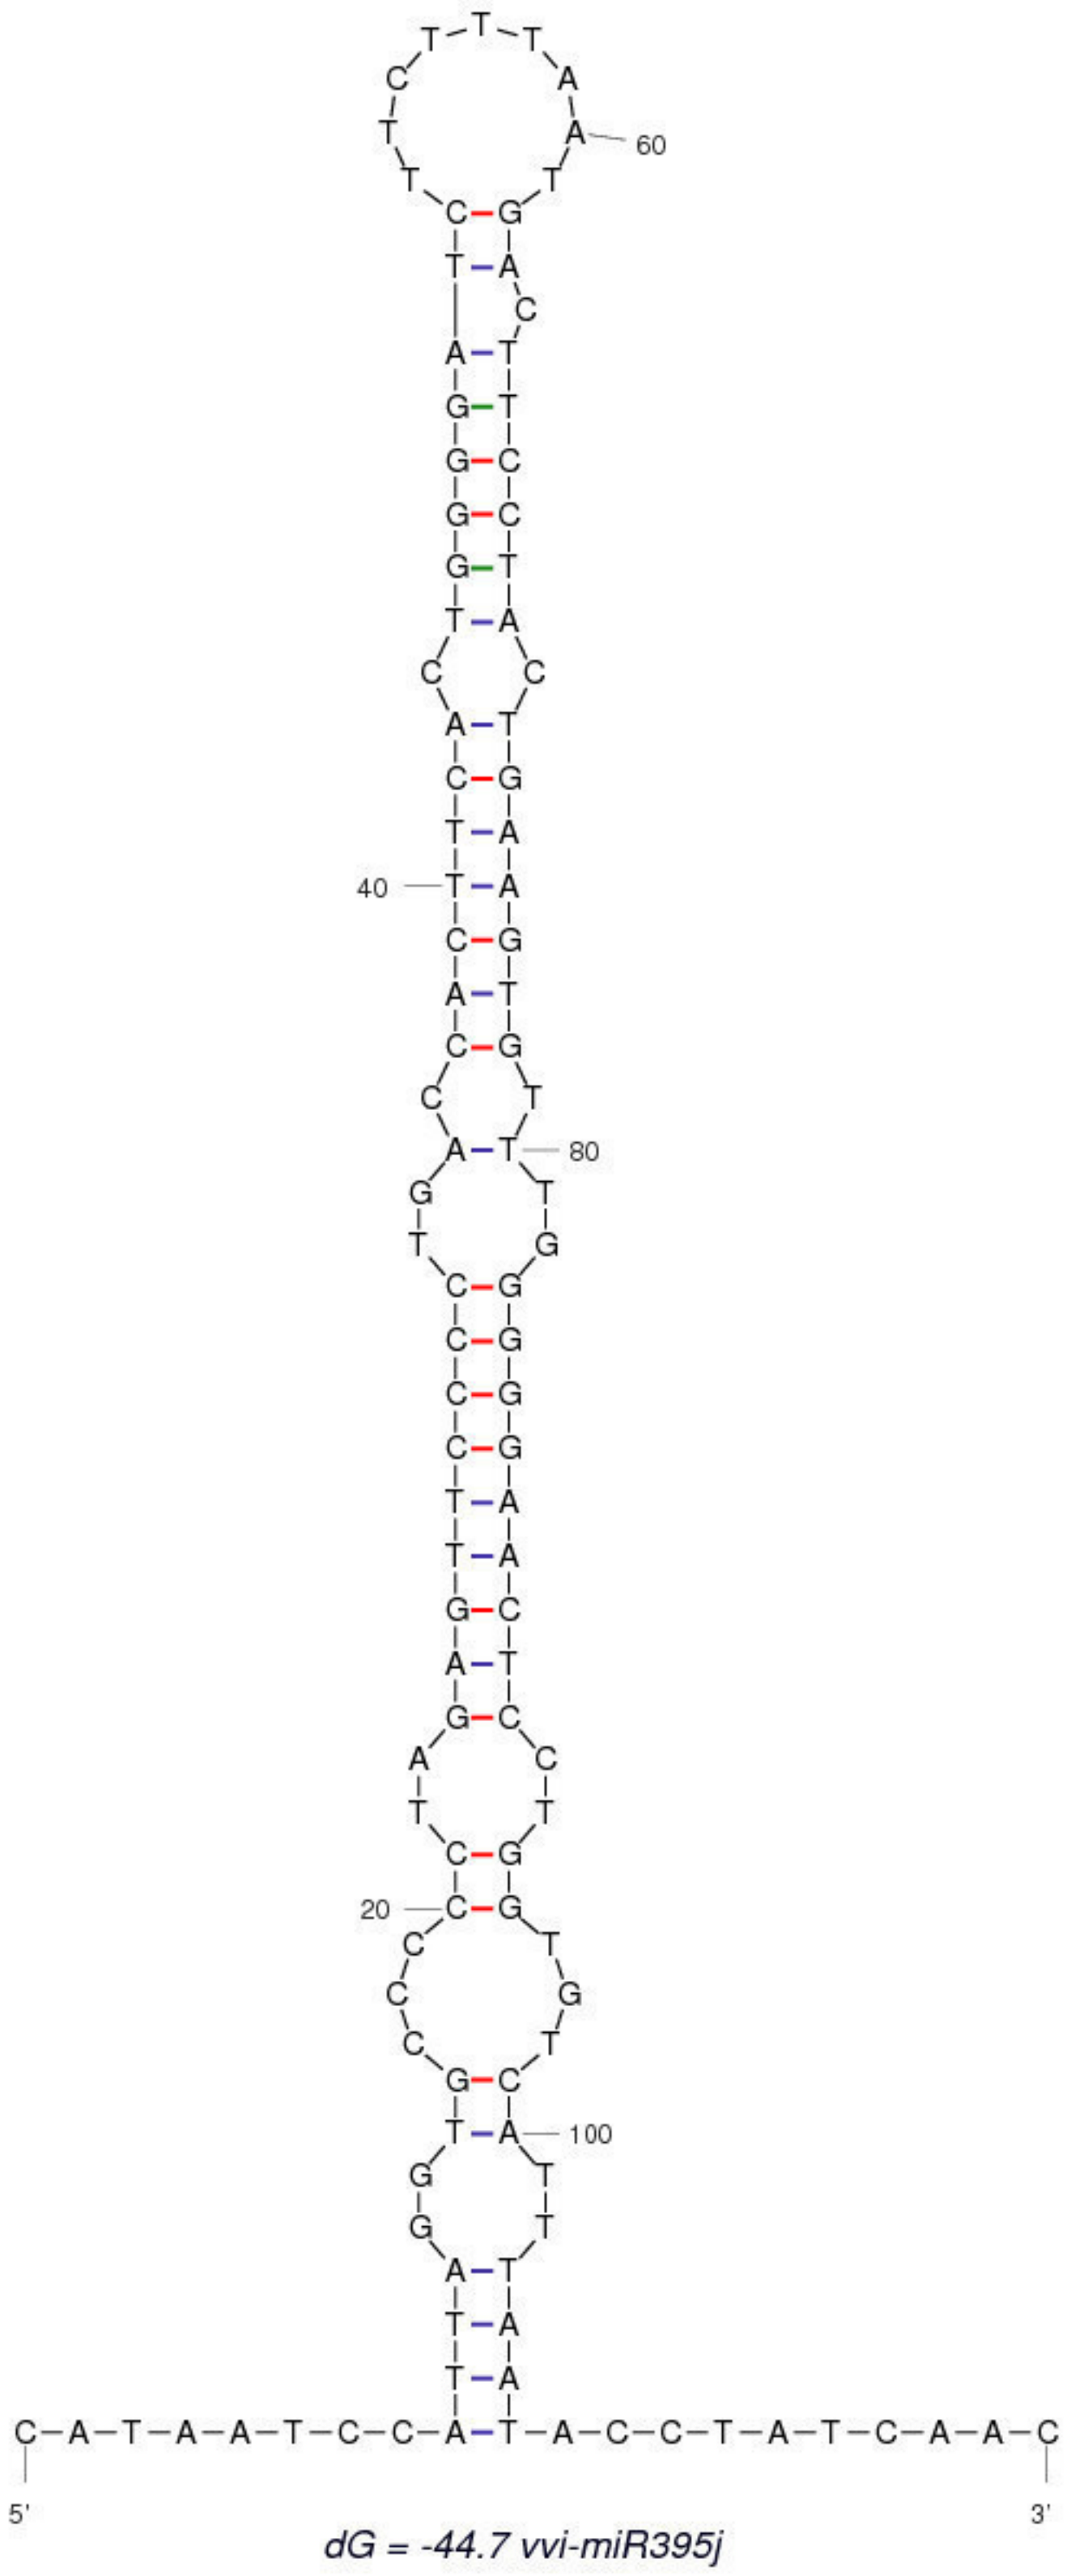

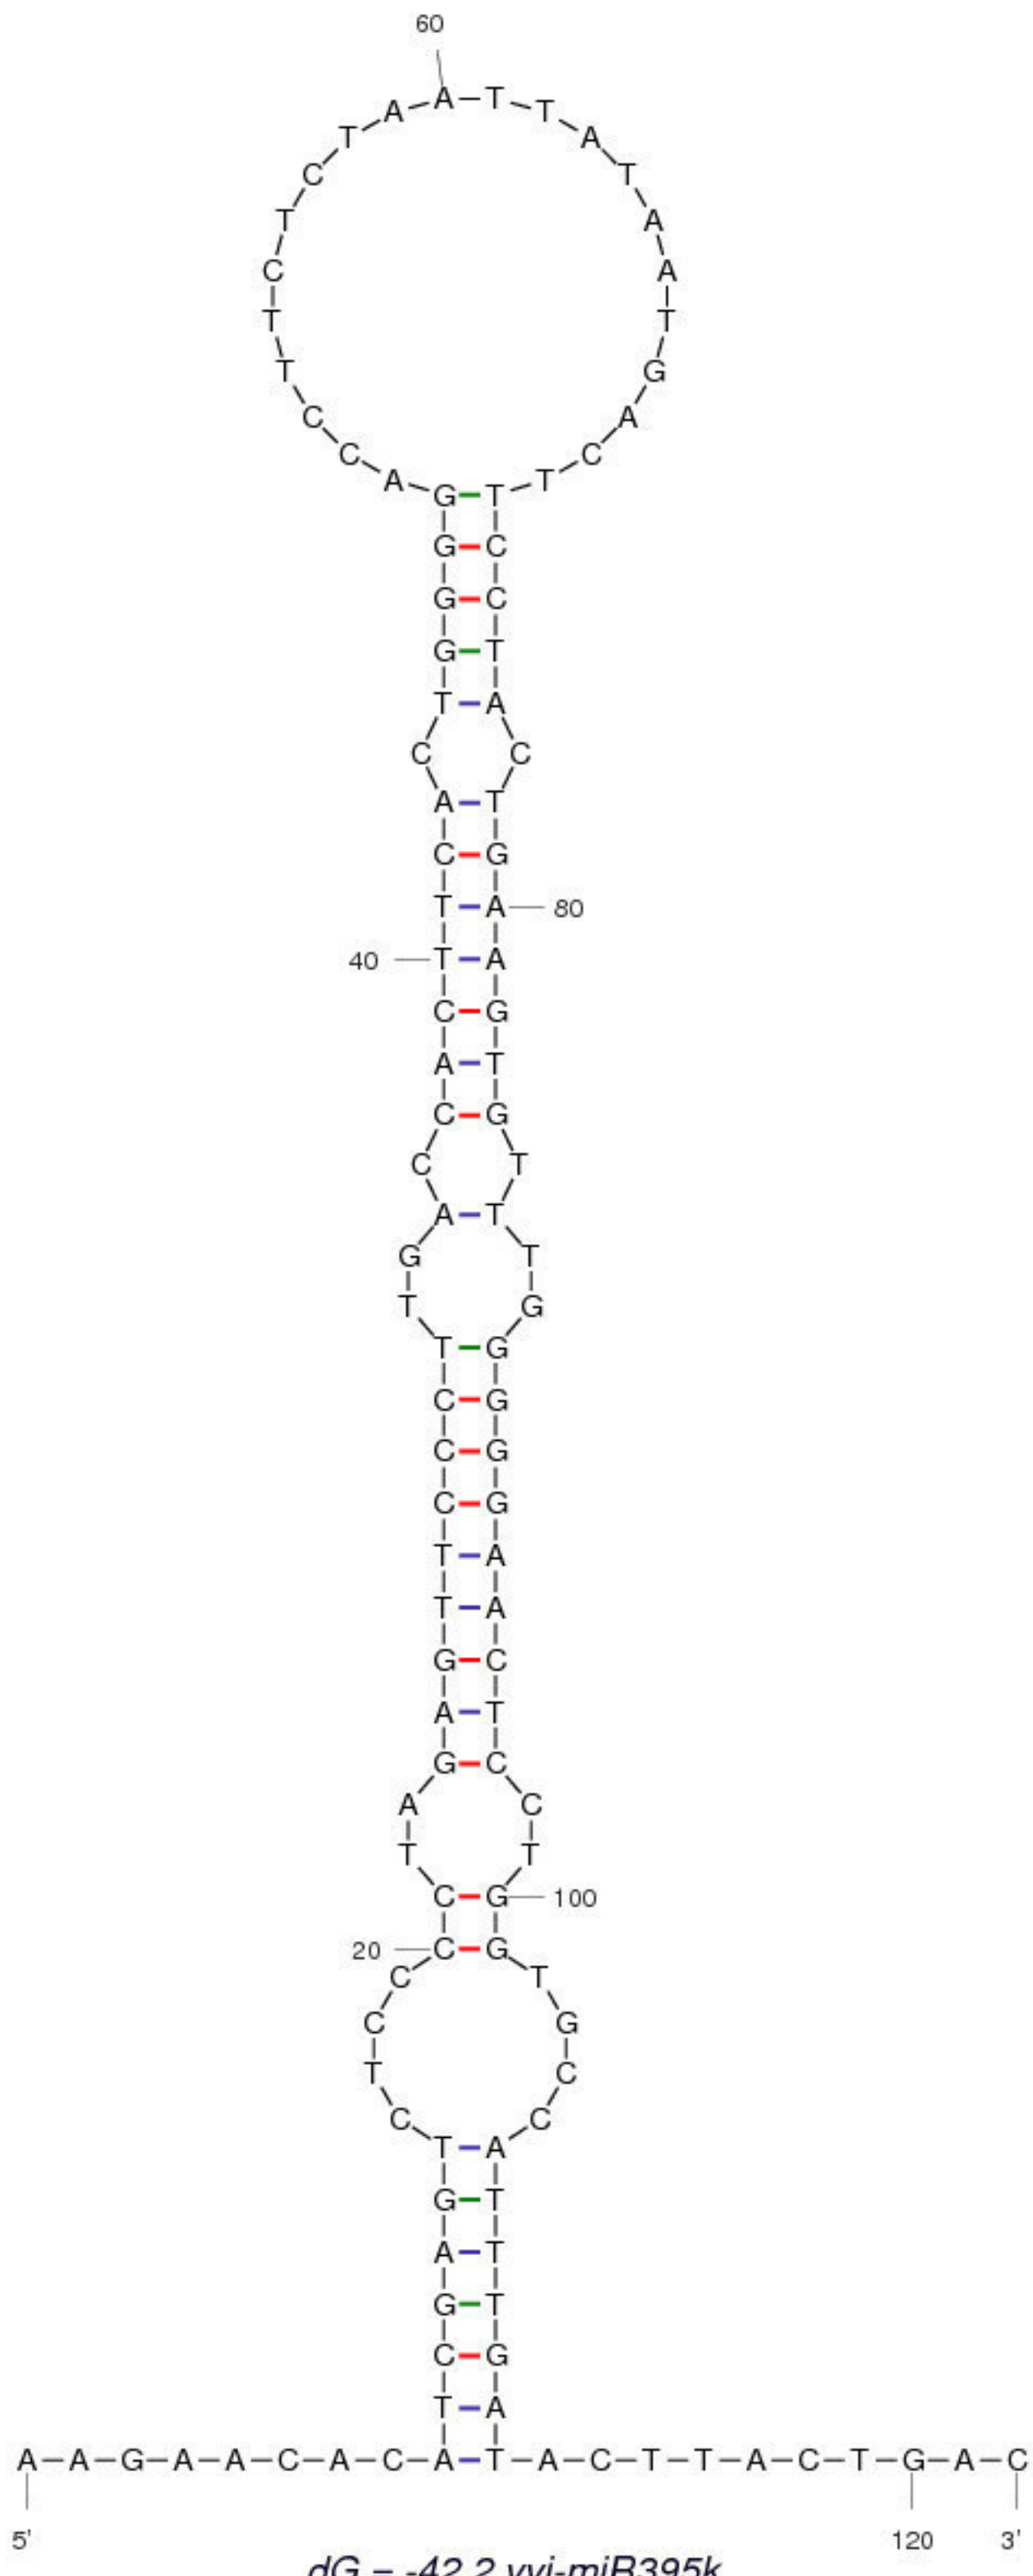

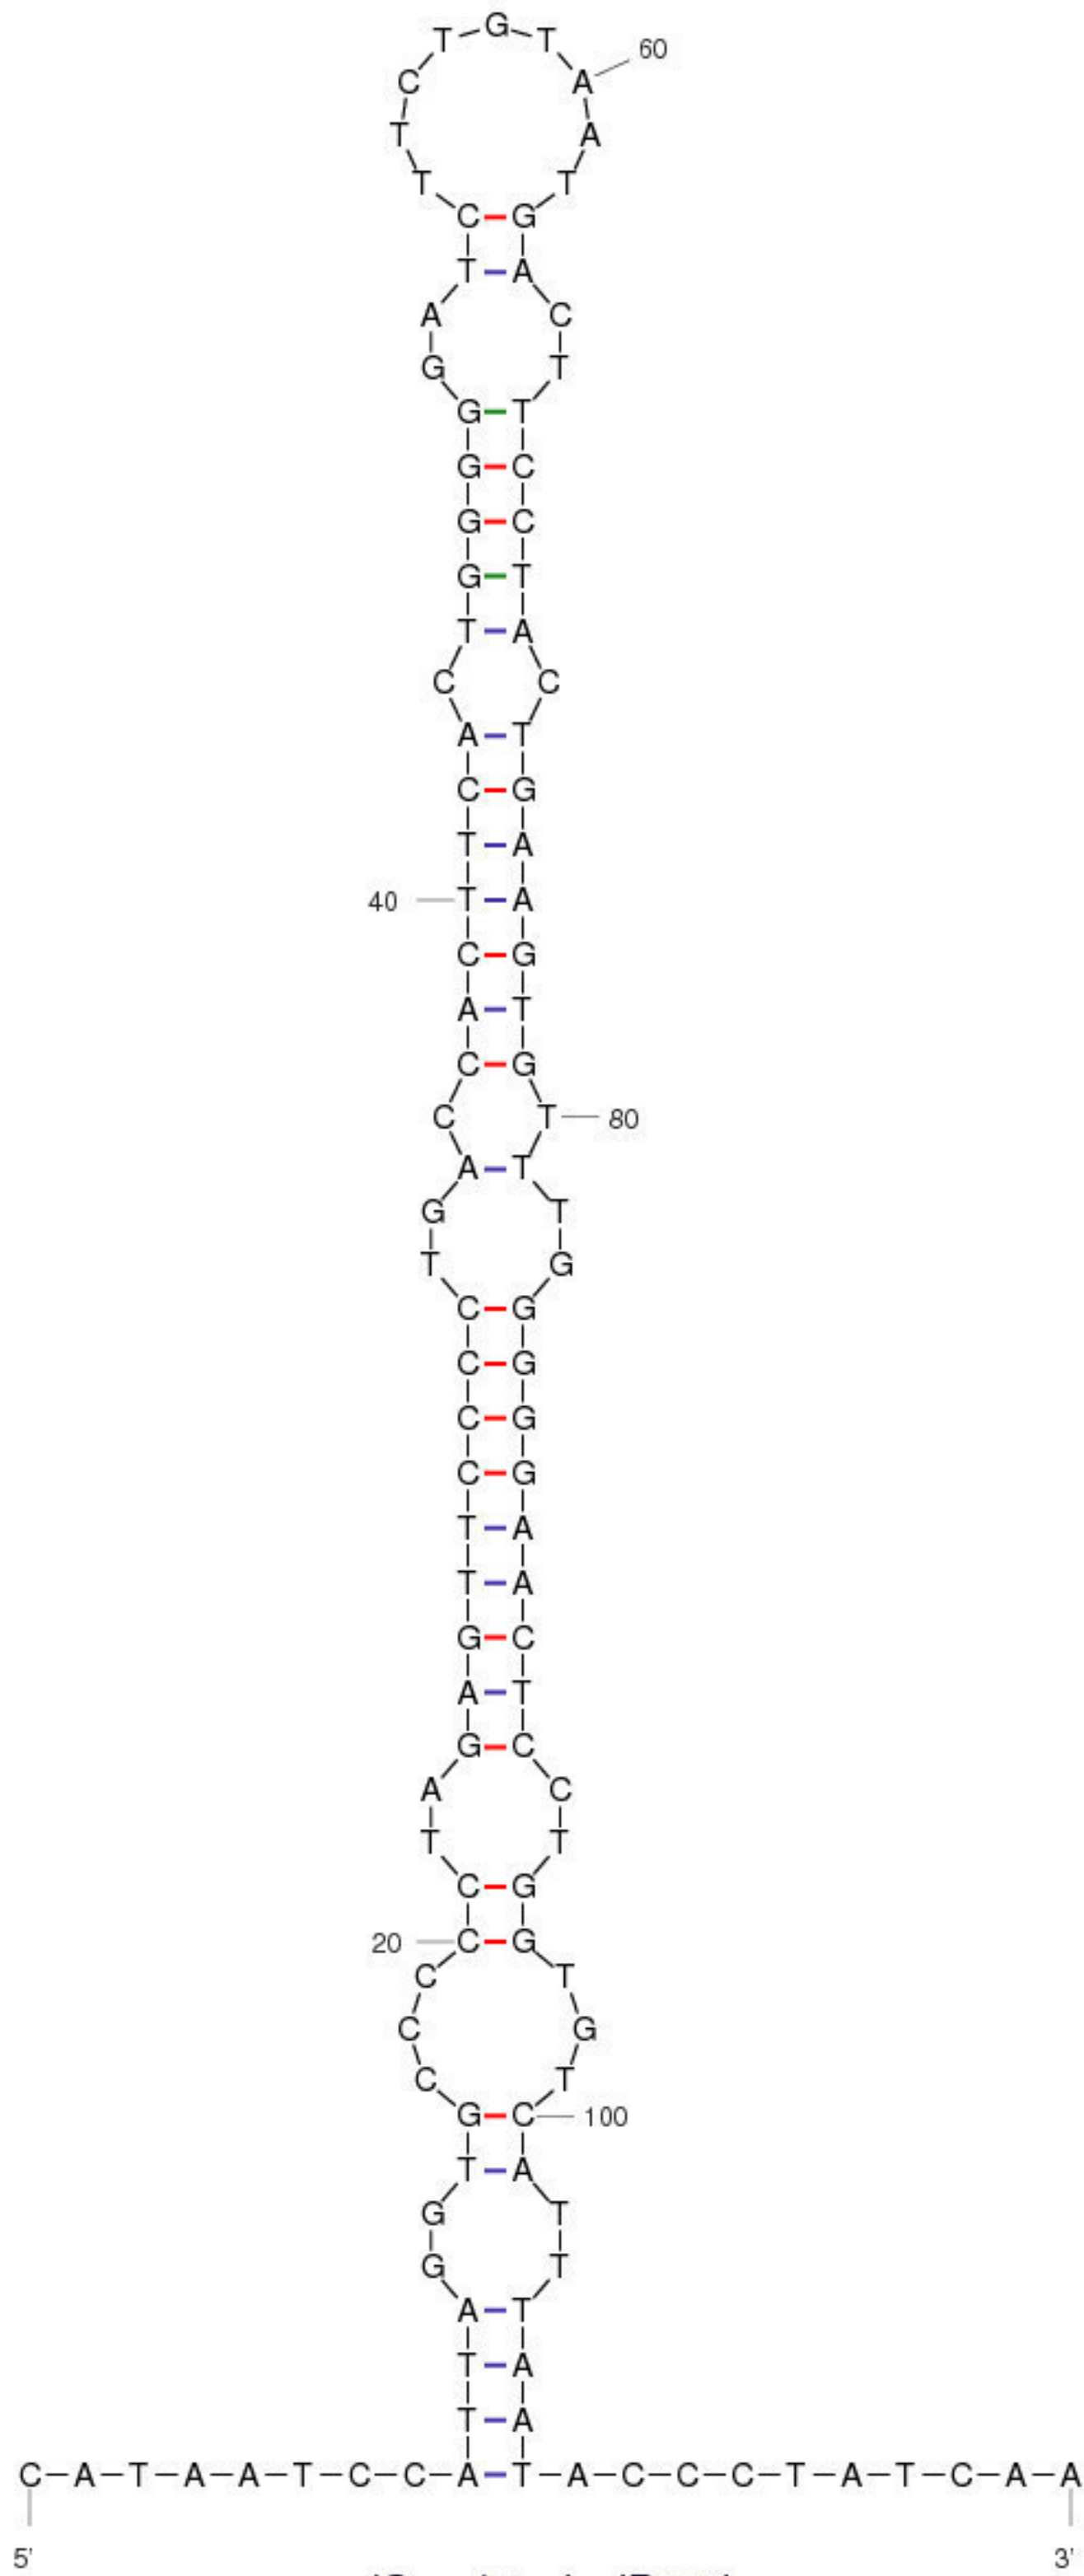

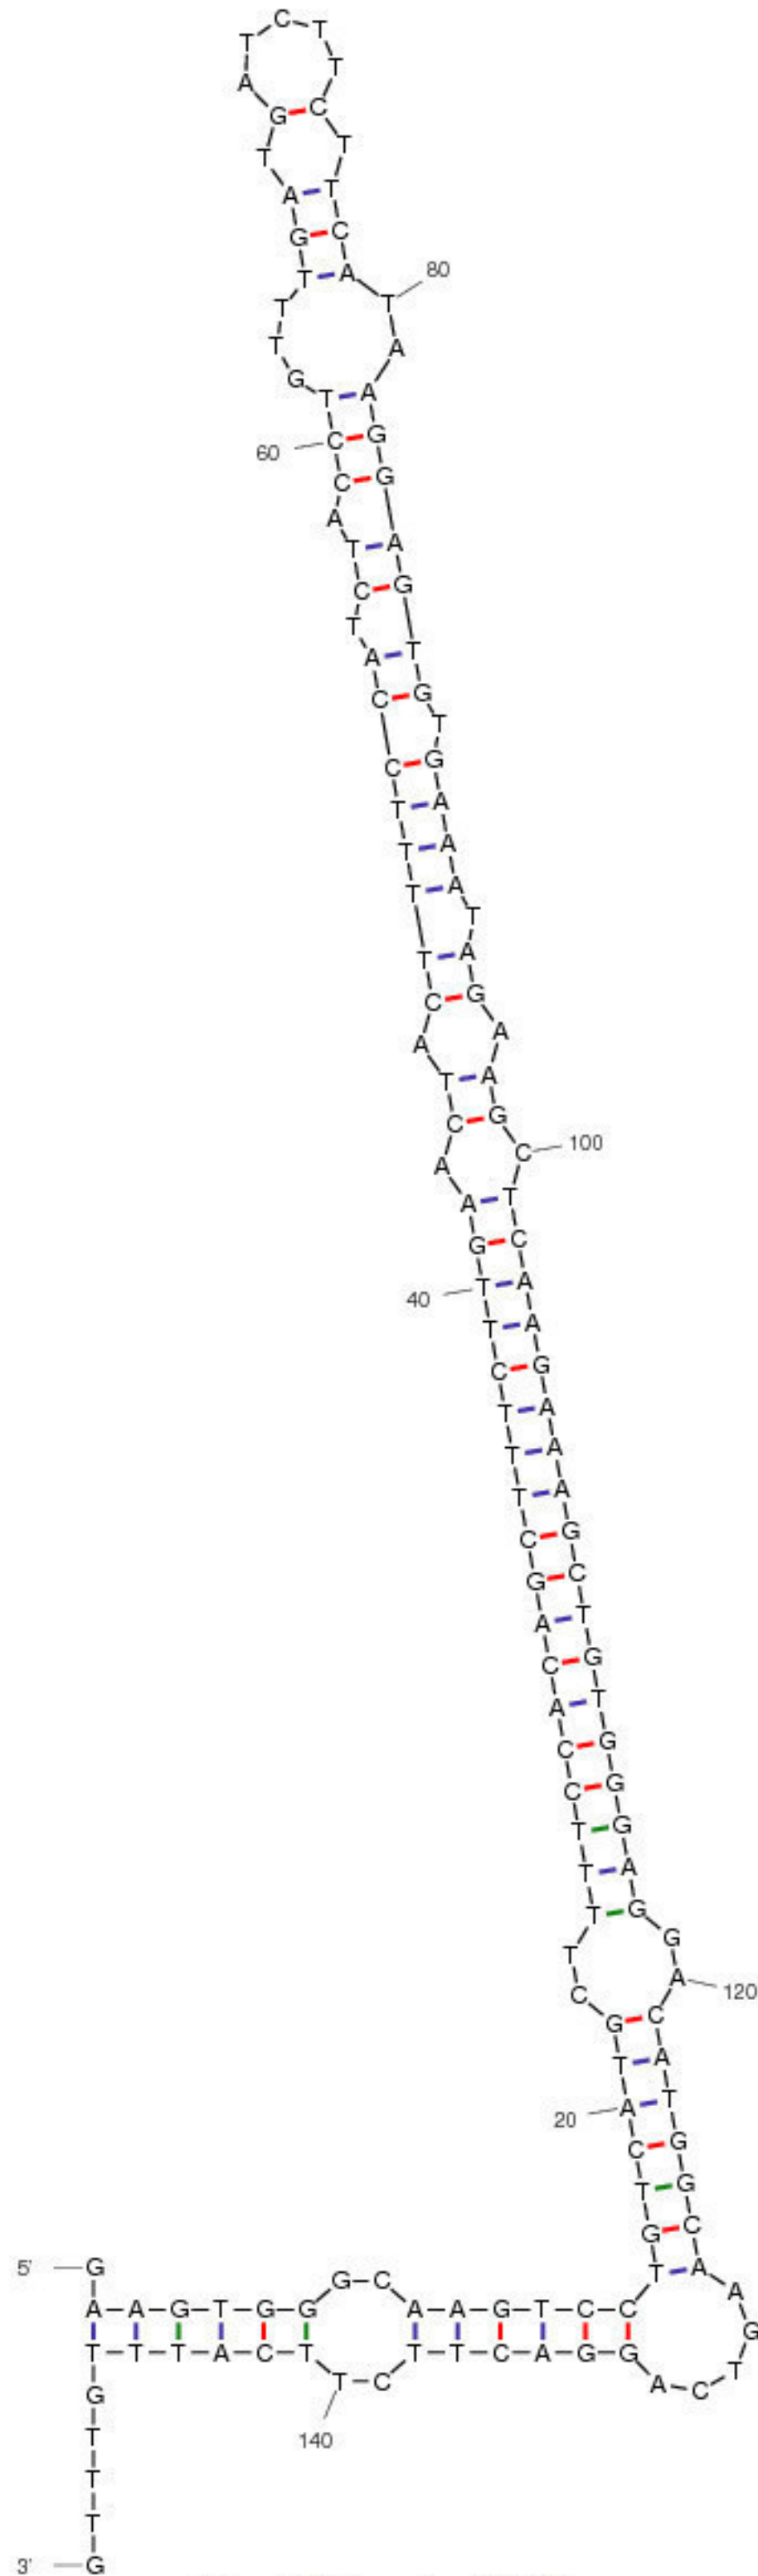

dG = -62.1 vvi-miR396a

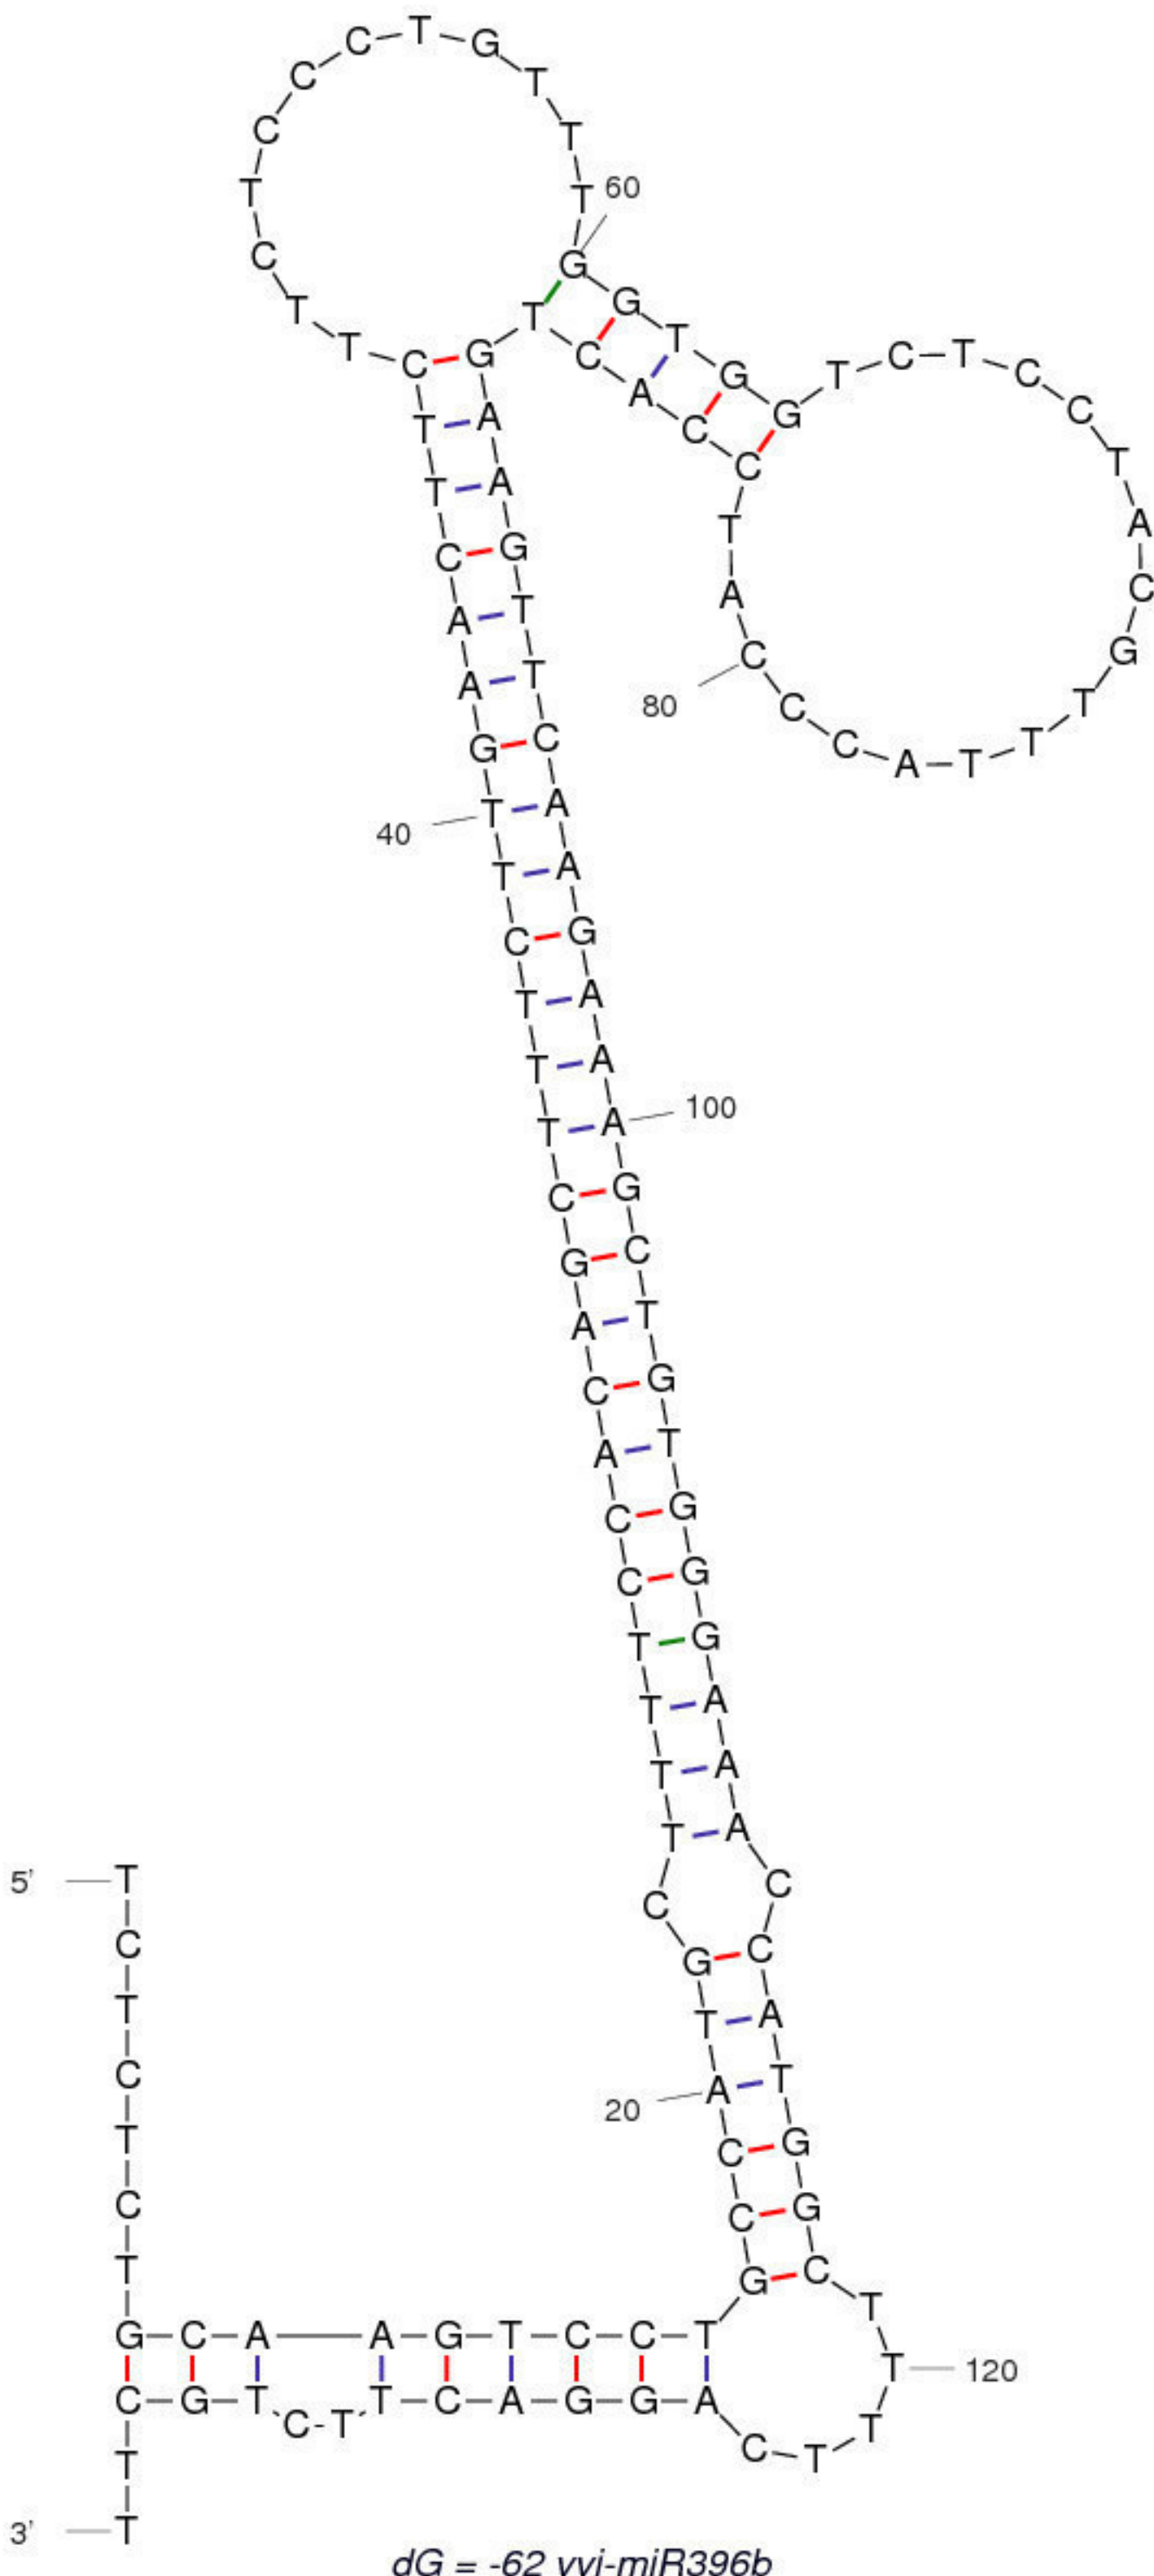



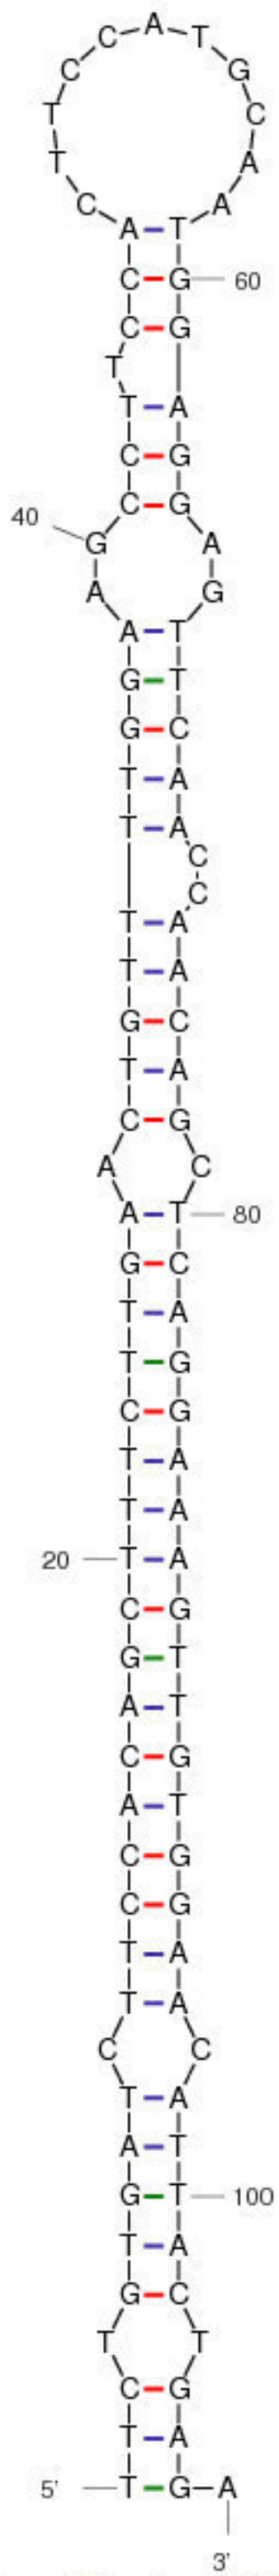

*dG = -48 vvi-miR396c*

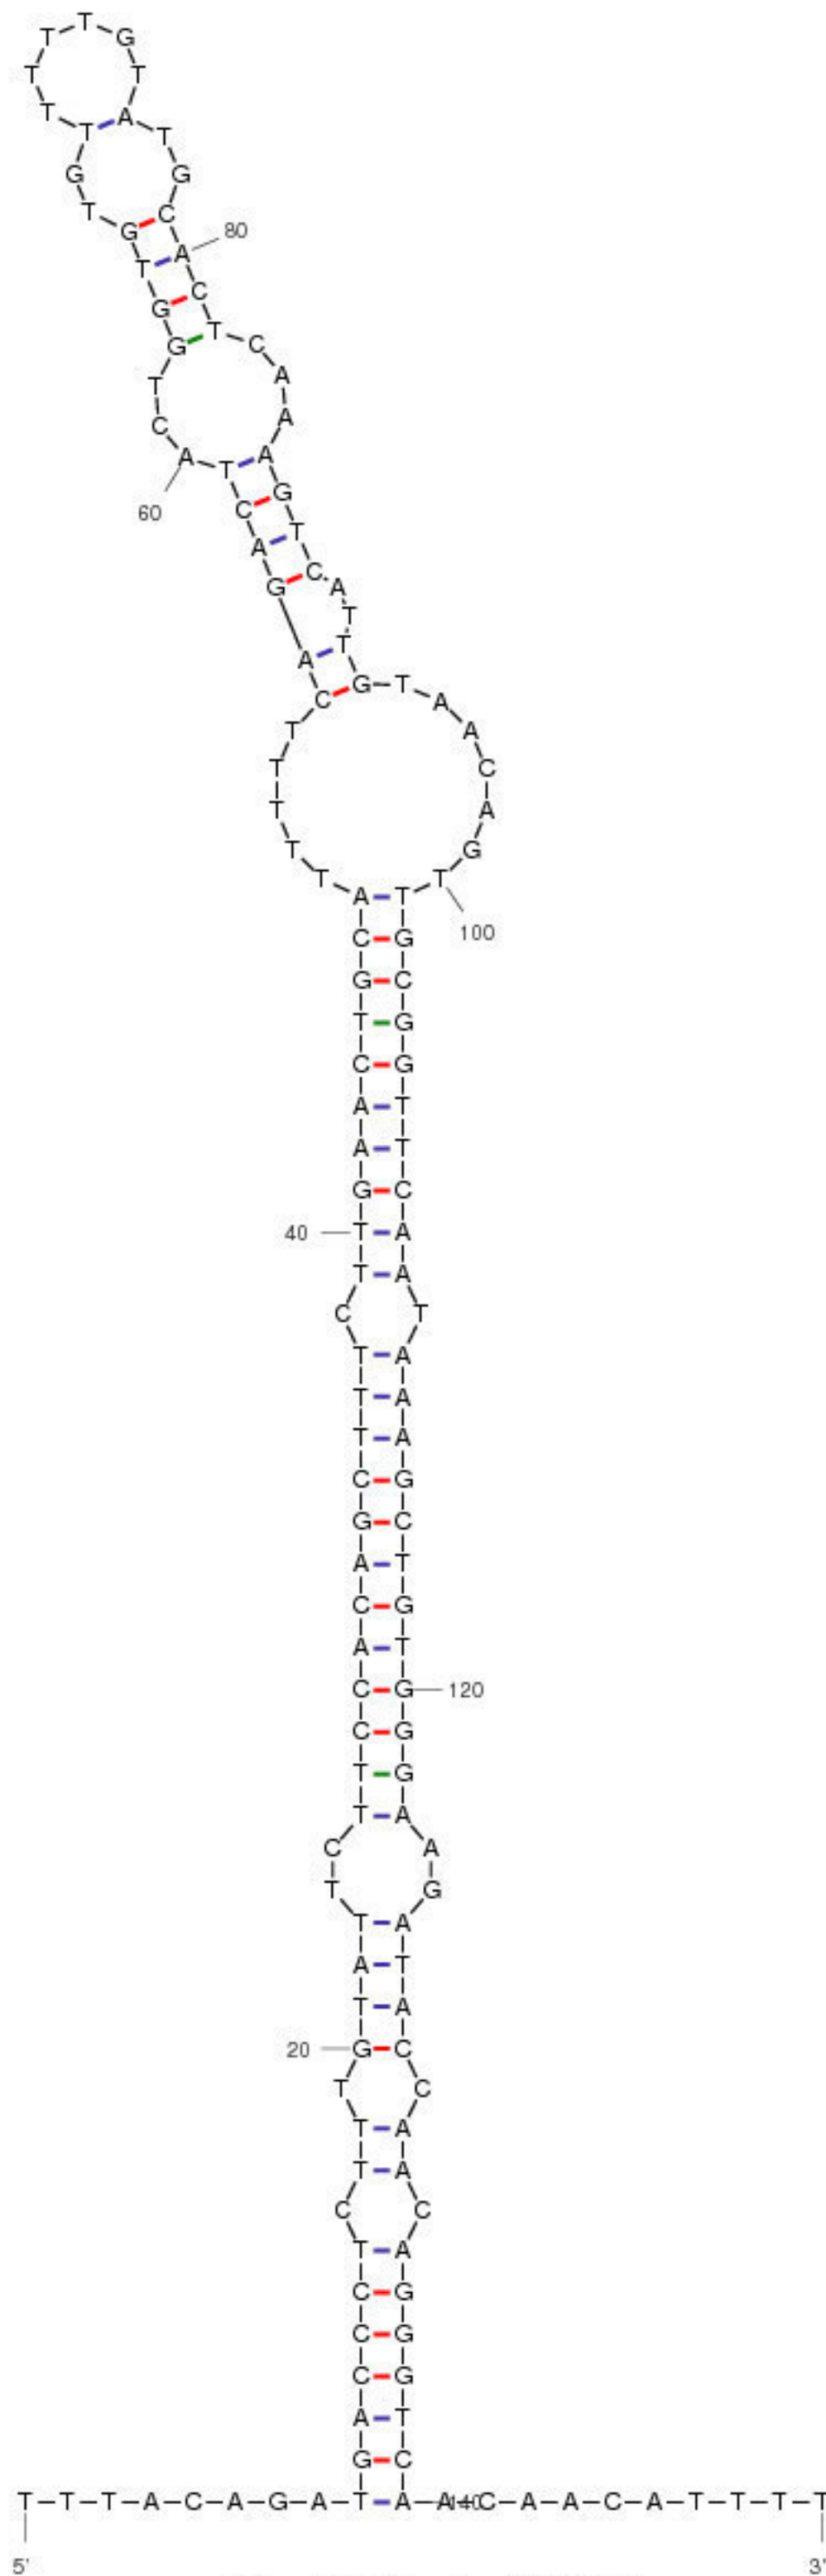

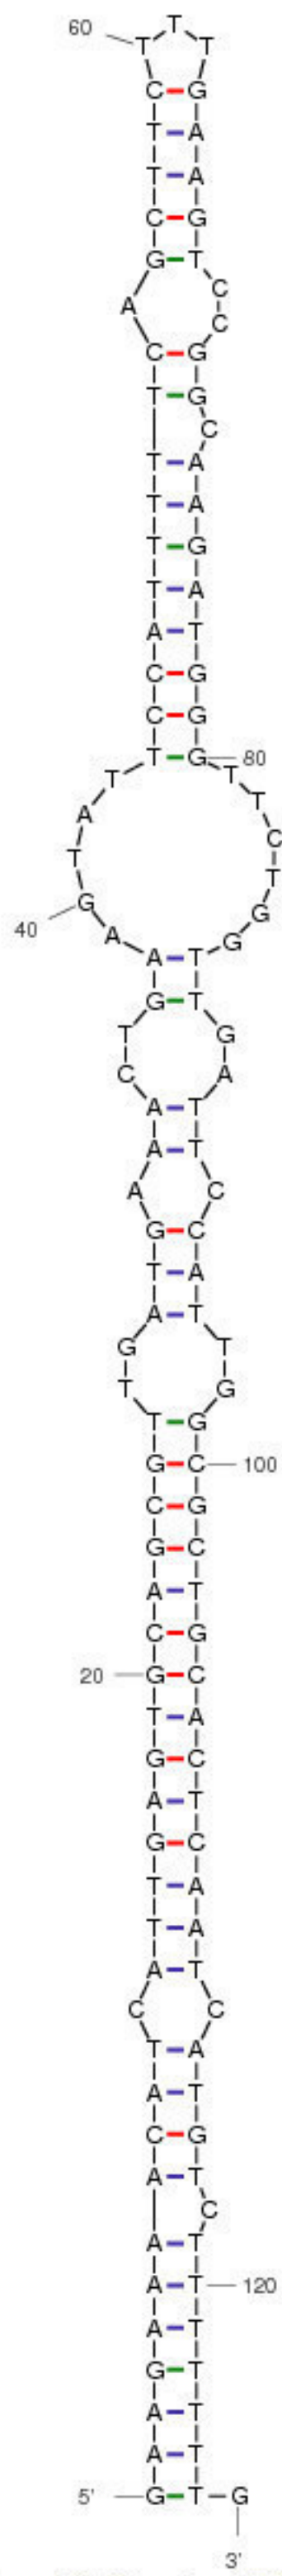

$dG = -48.7$  vvi-miR397a

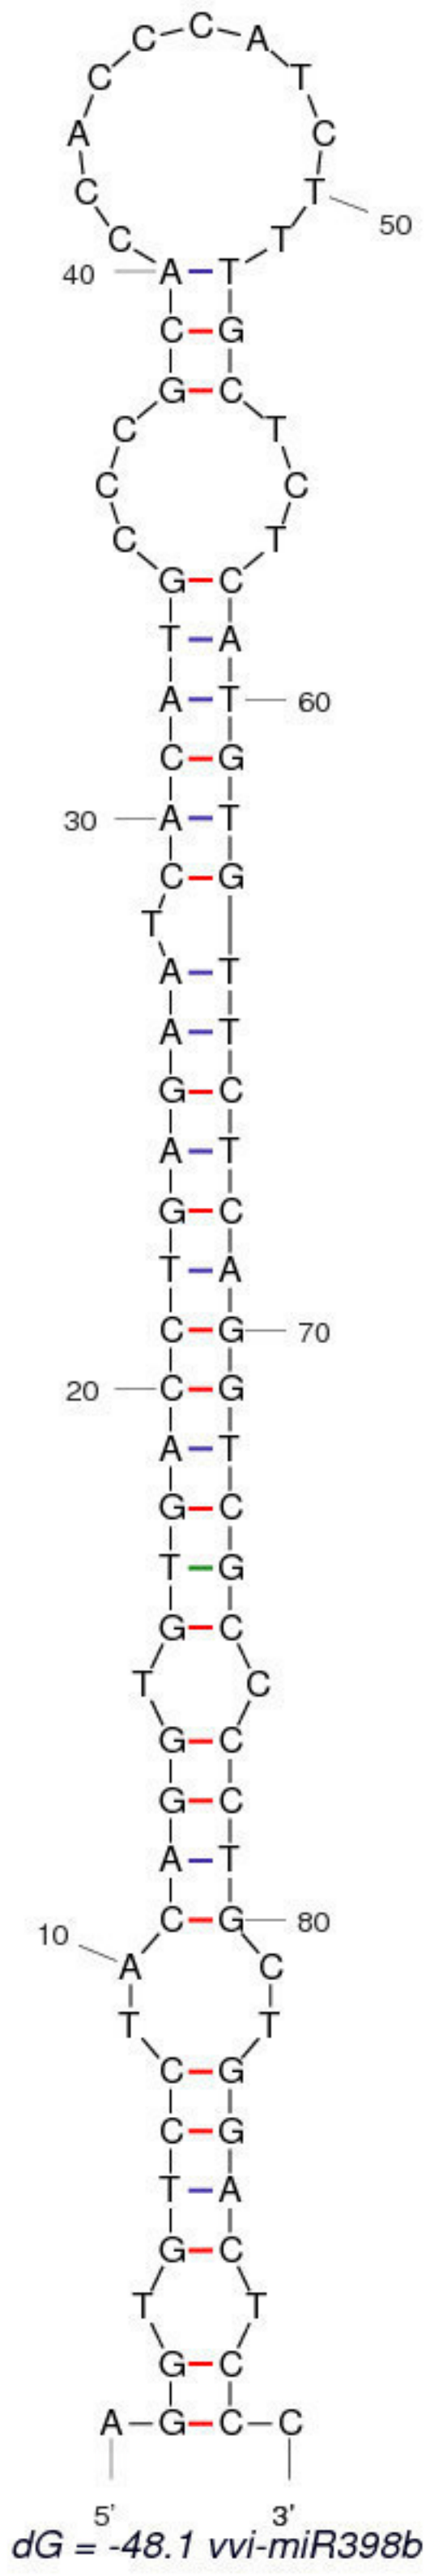

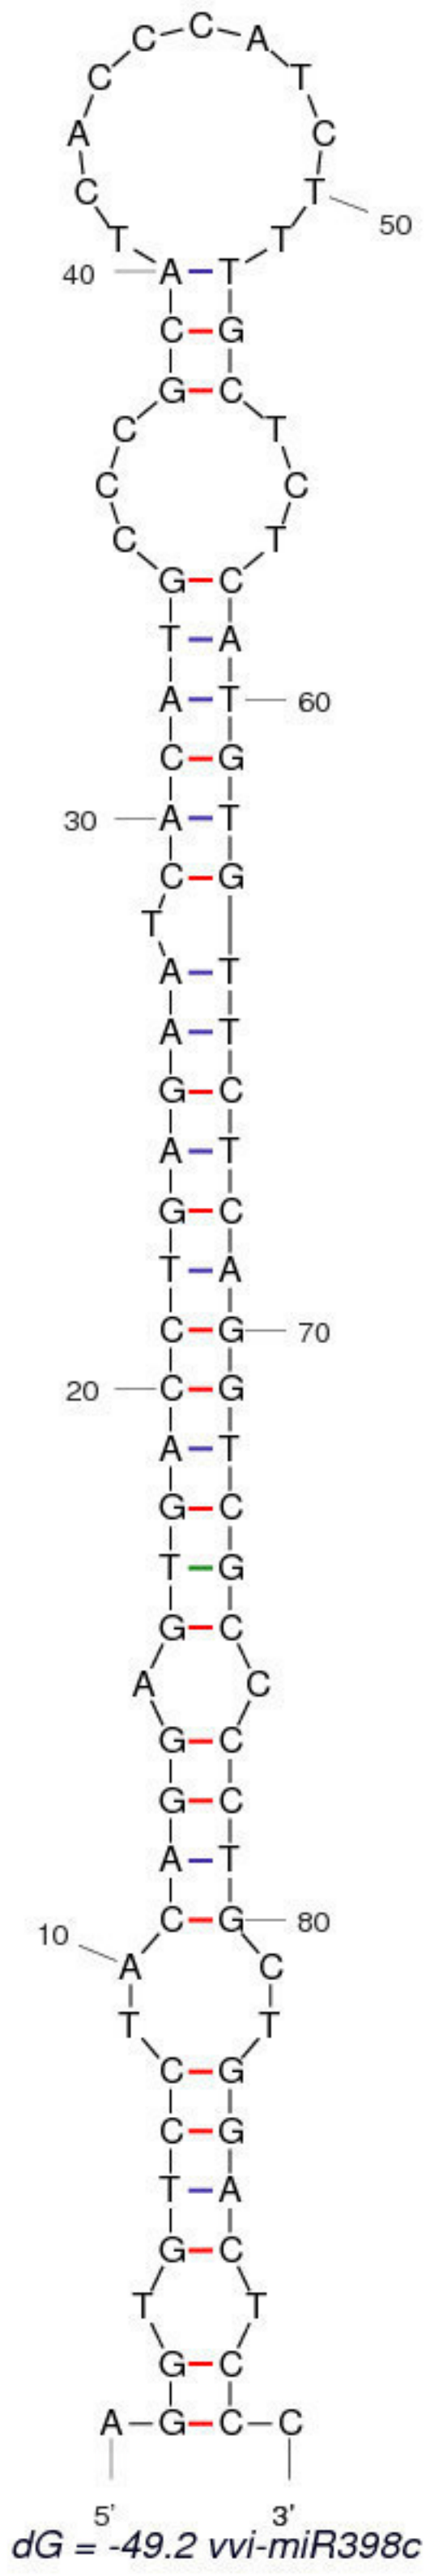

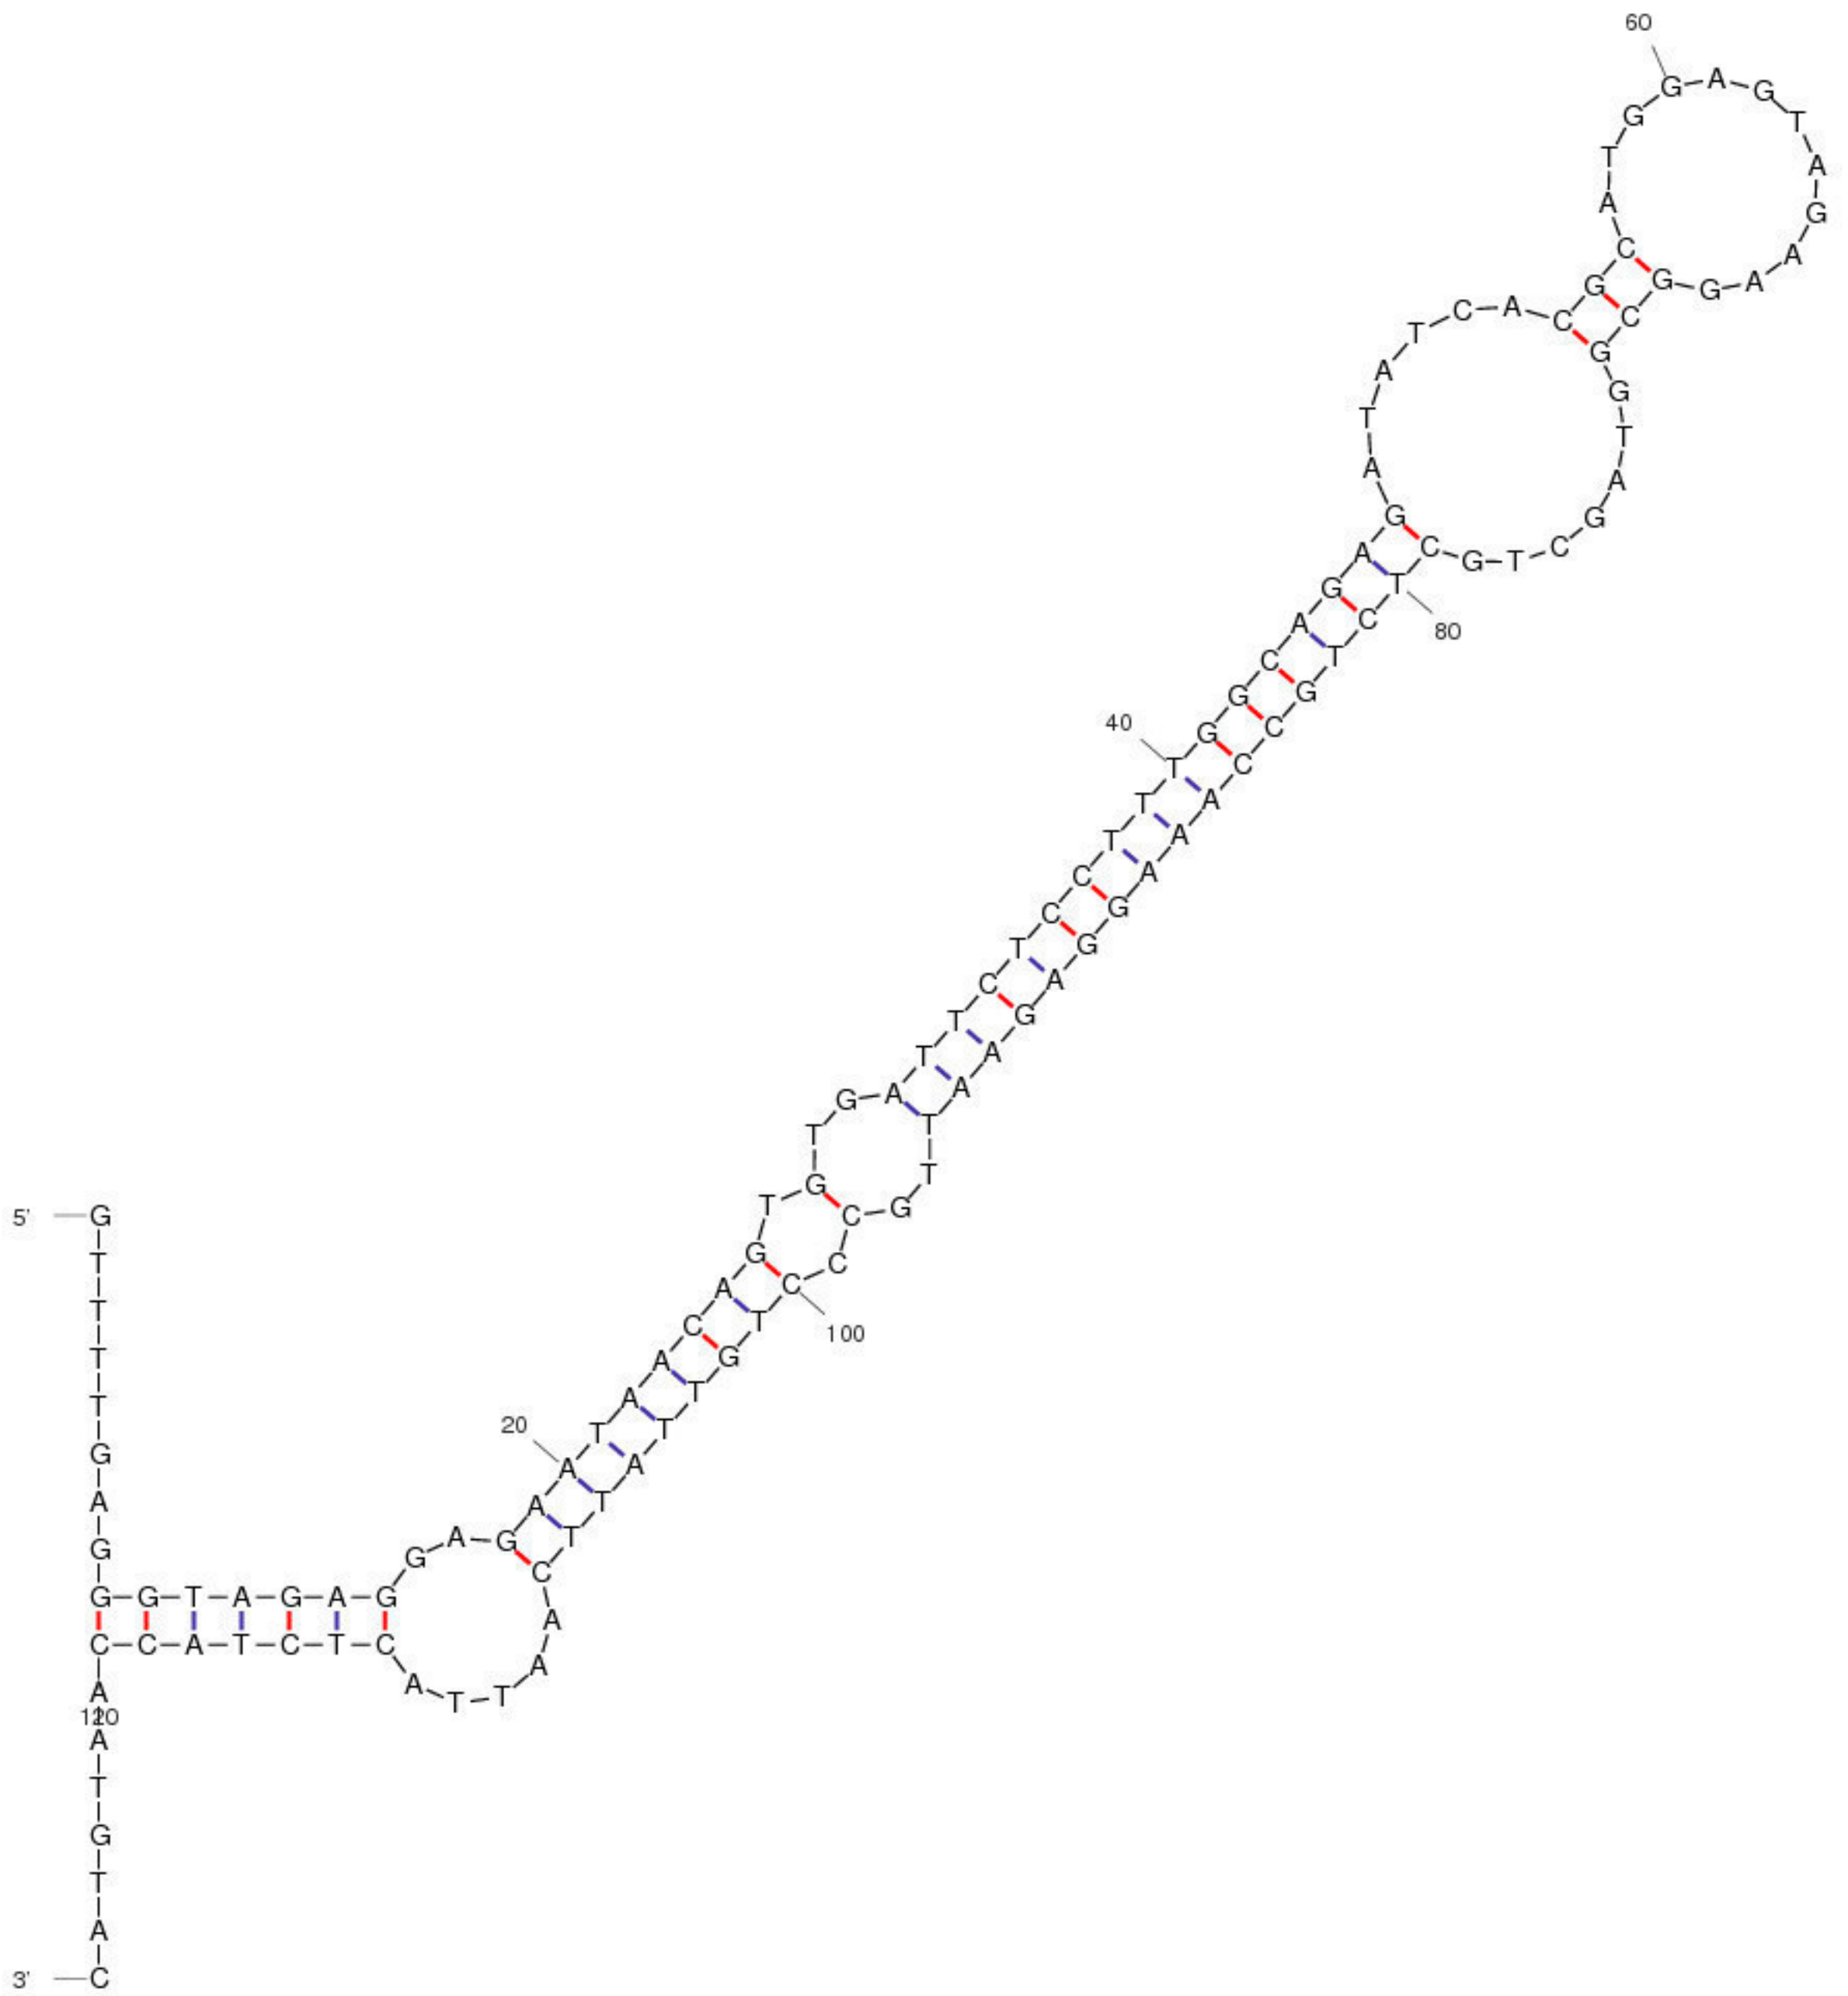

dG = -61.9 vvi-miR399a

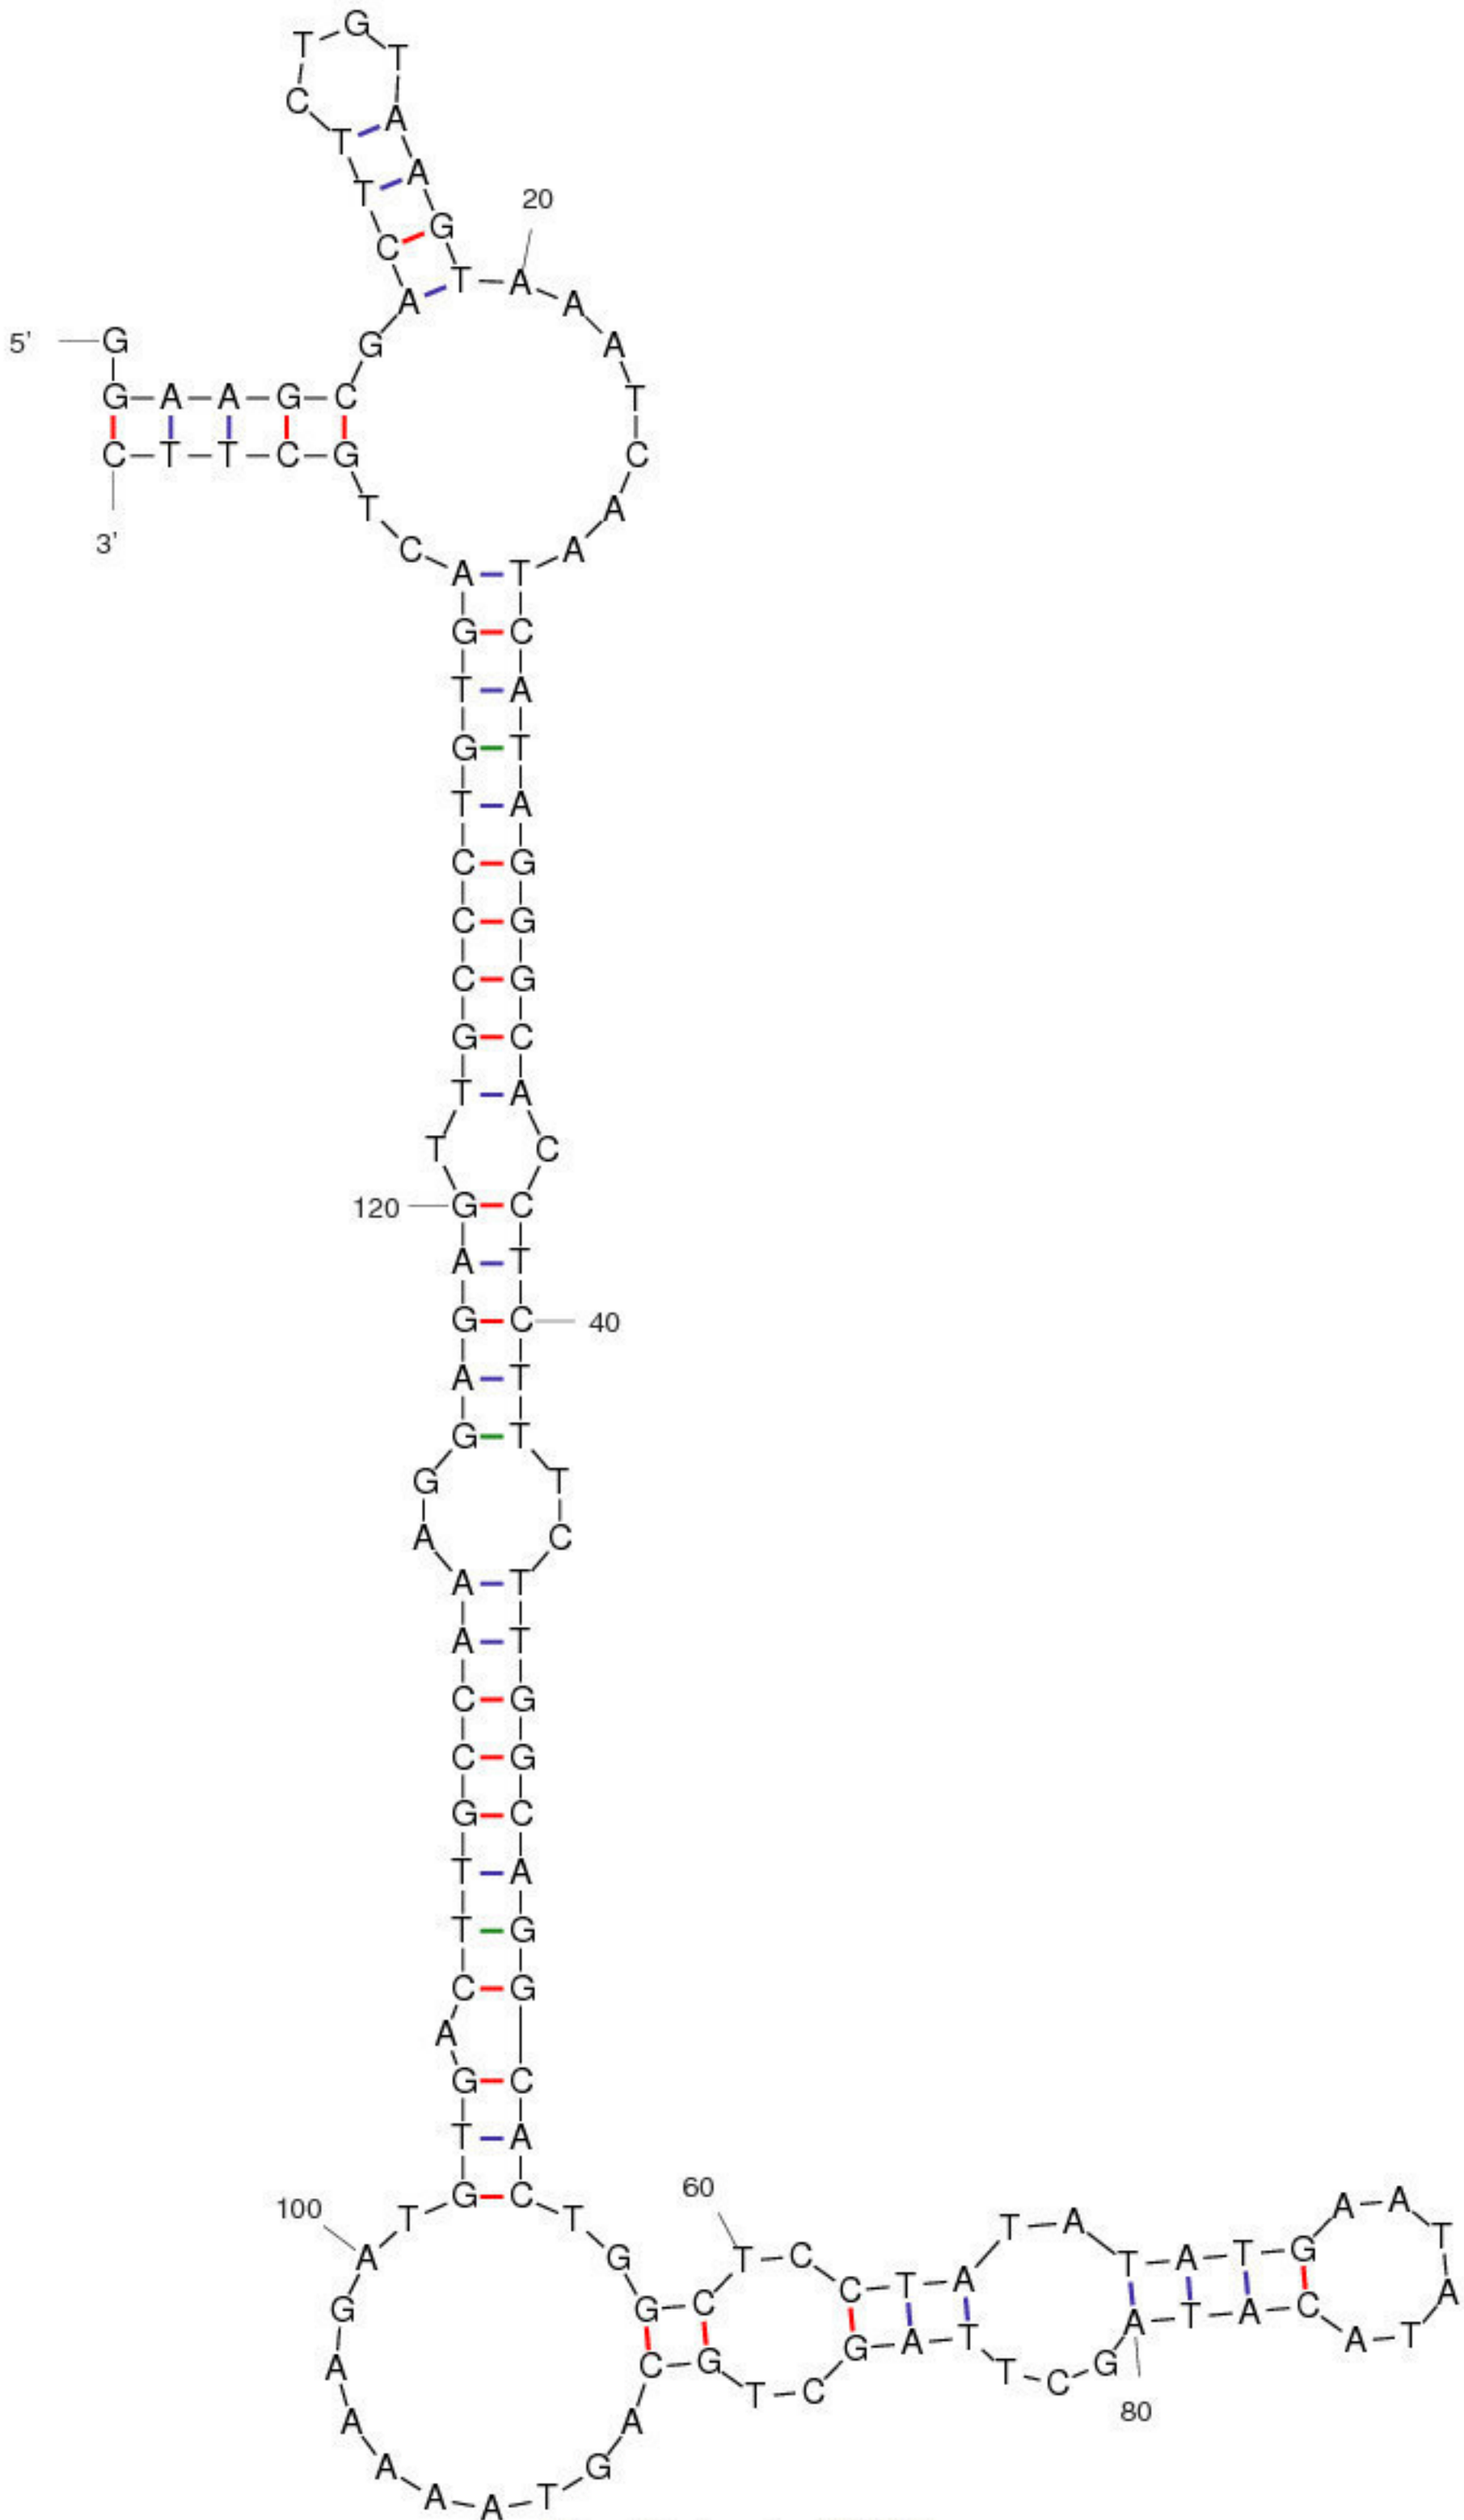

dG = -53.1 vvi-miR399b

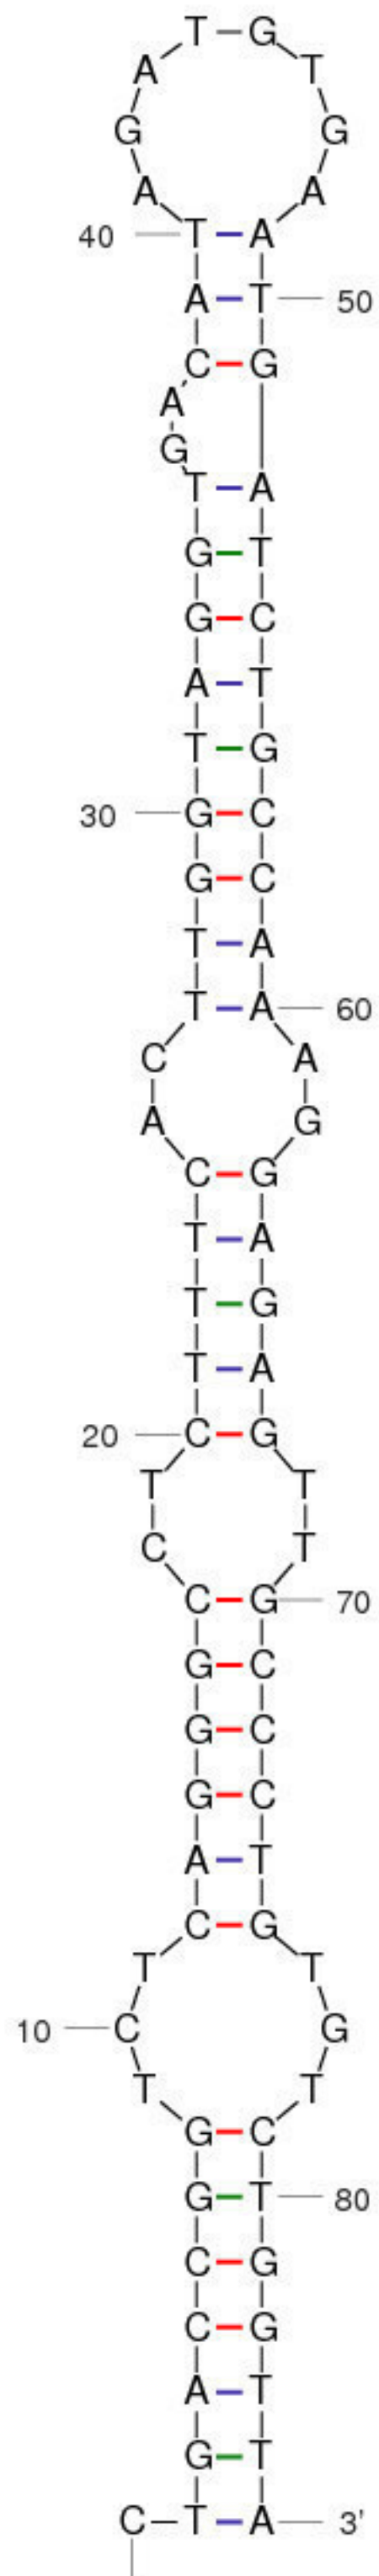

5'  
*dG = -39.4 vvi-miR399c*



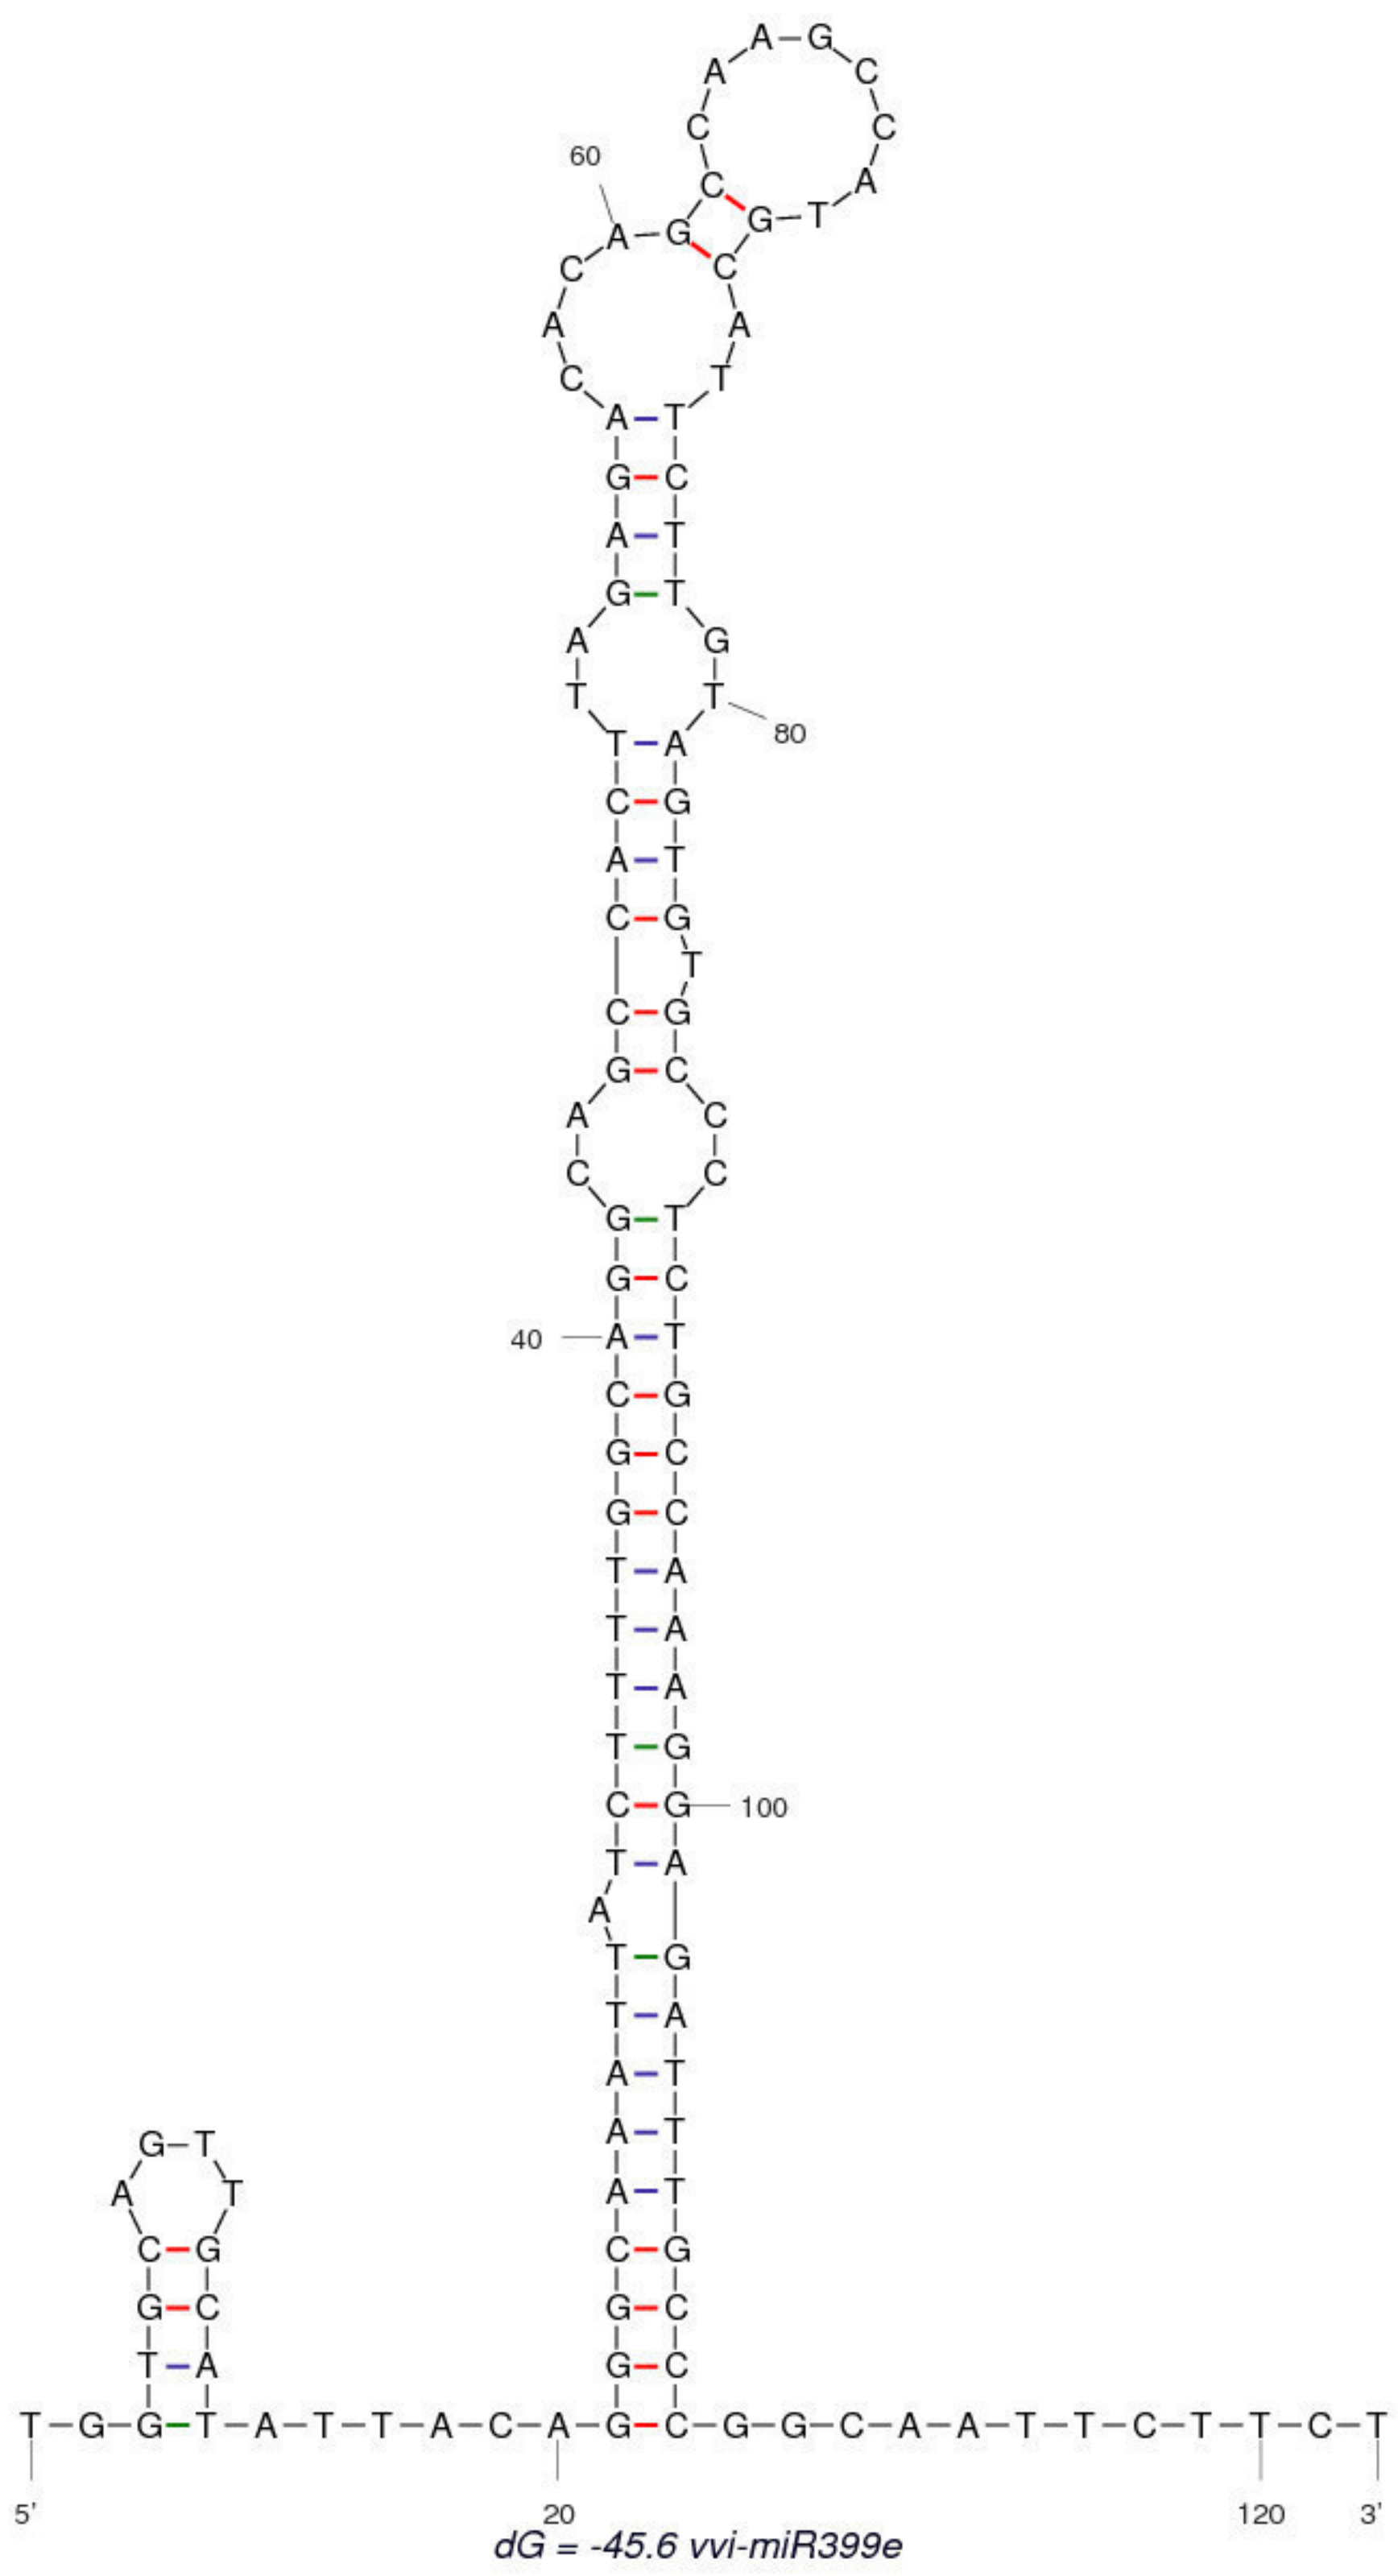

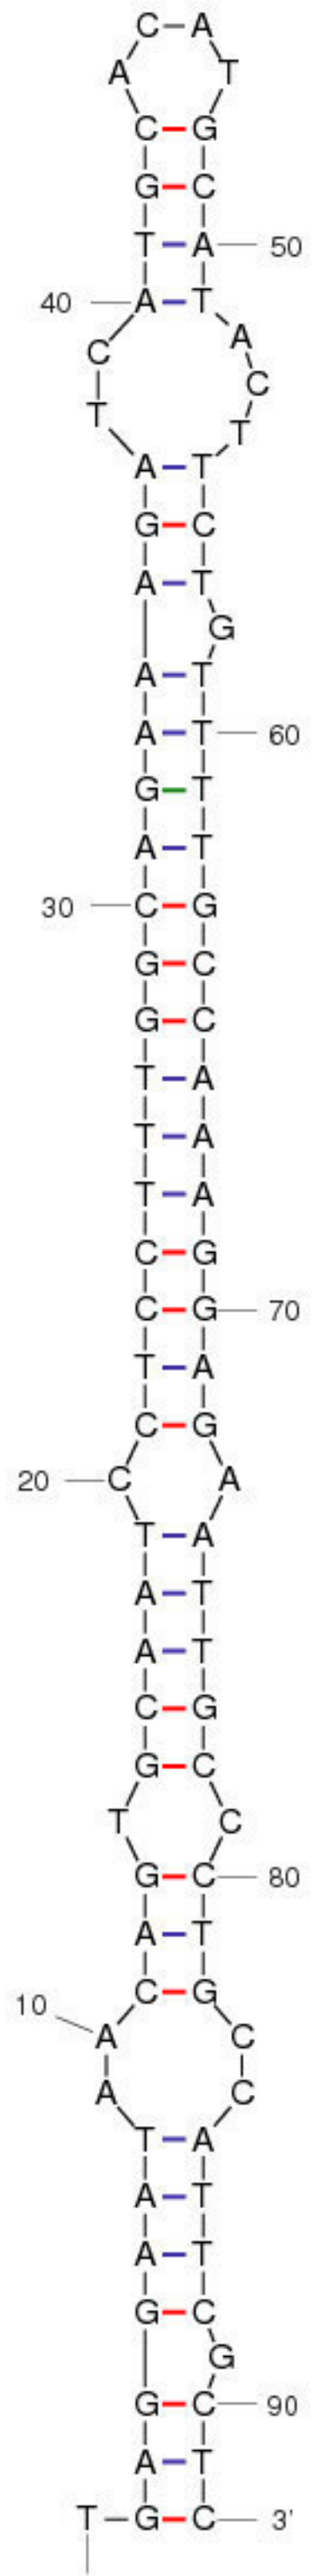

$dG = -43.4$  vvi-miR399h

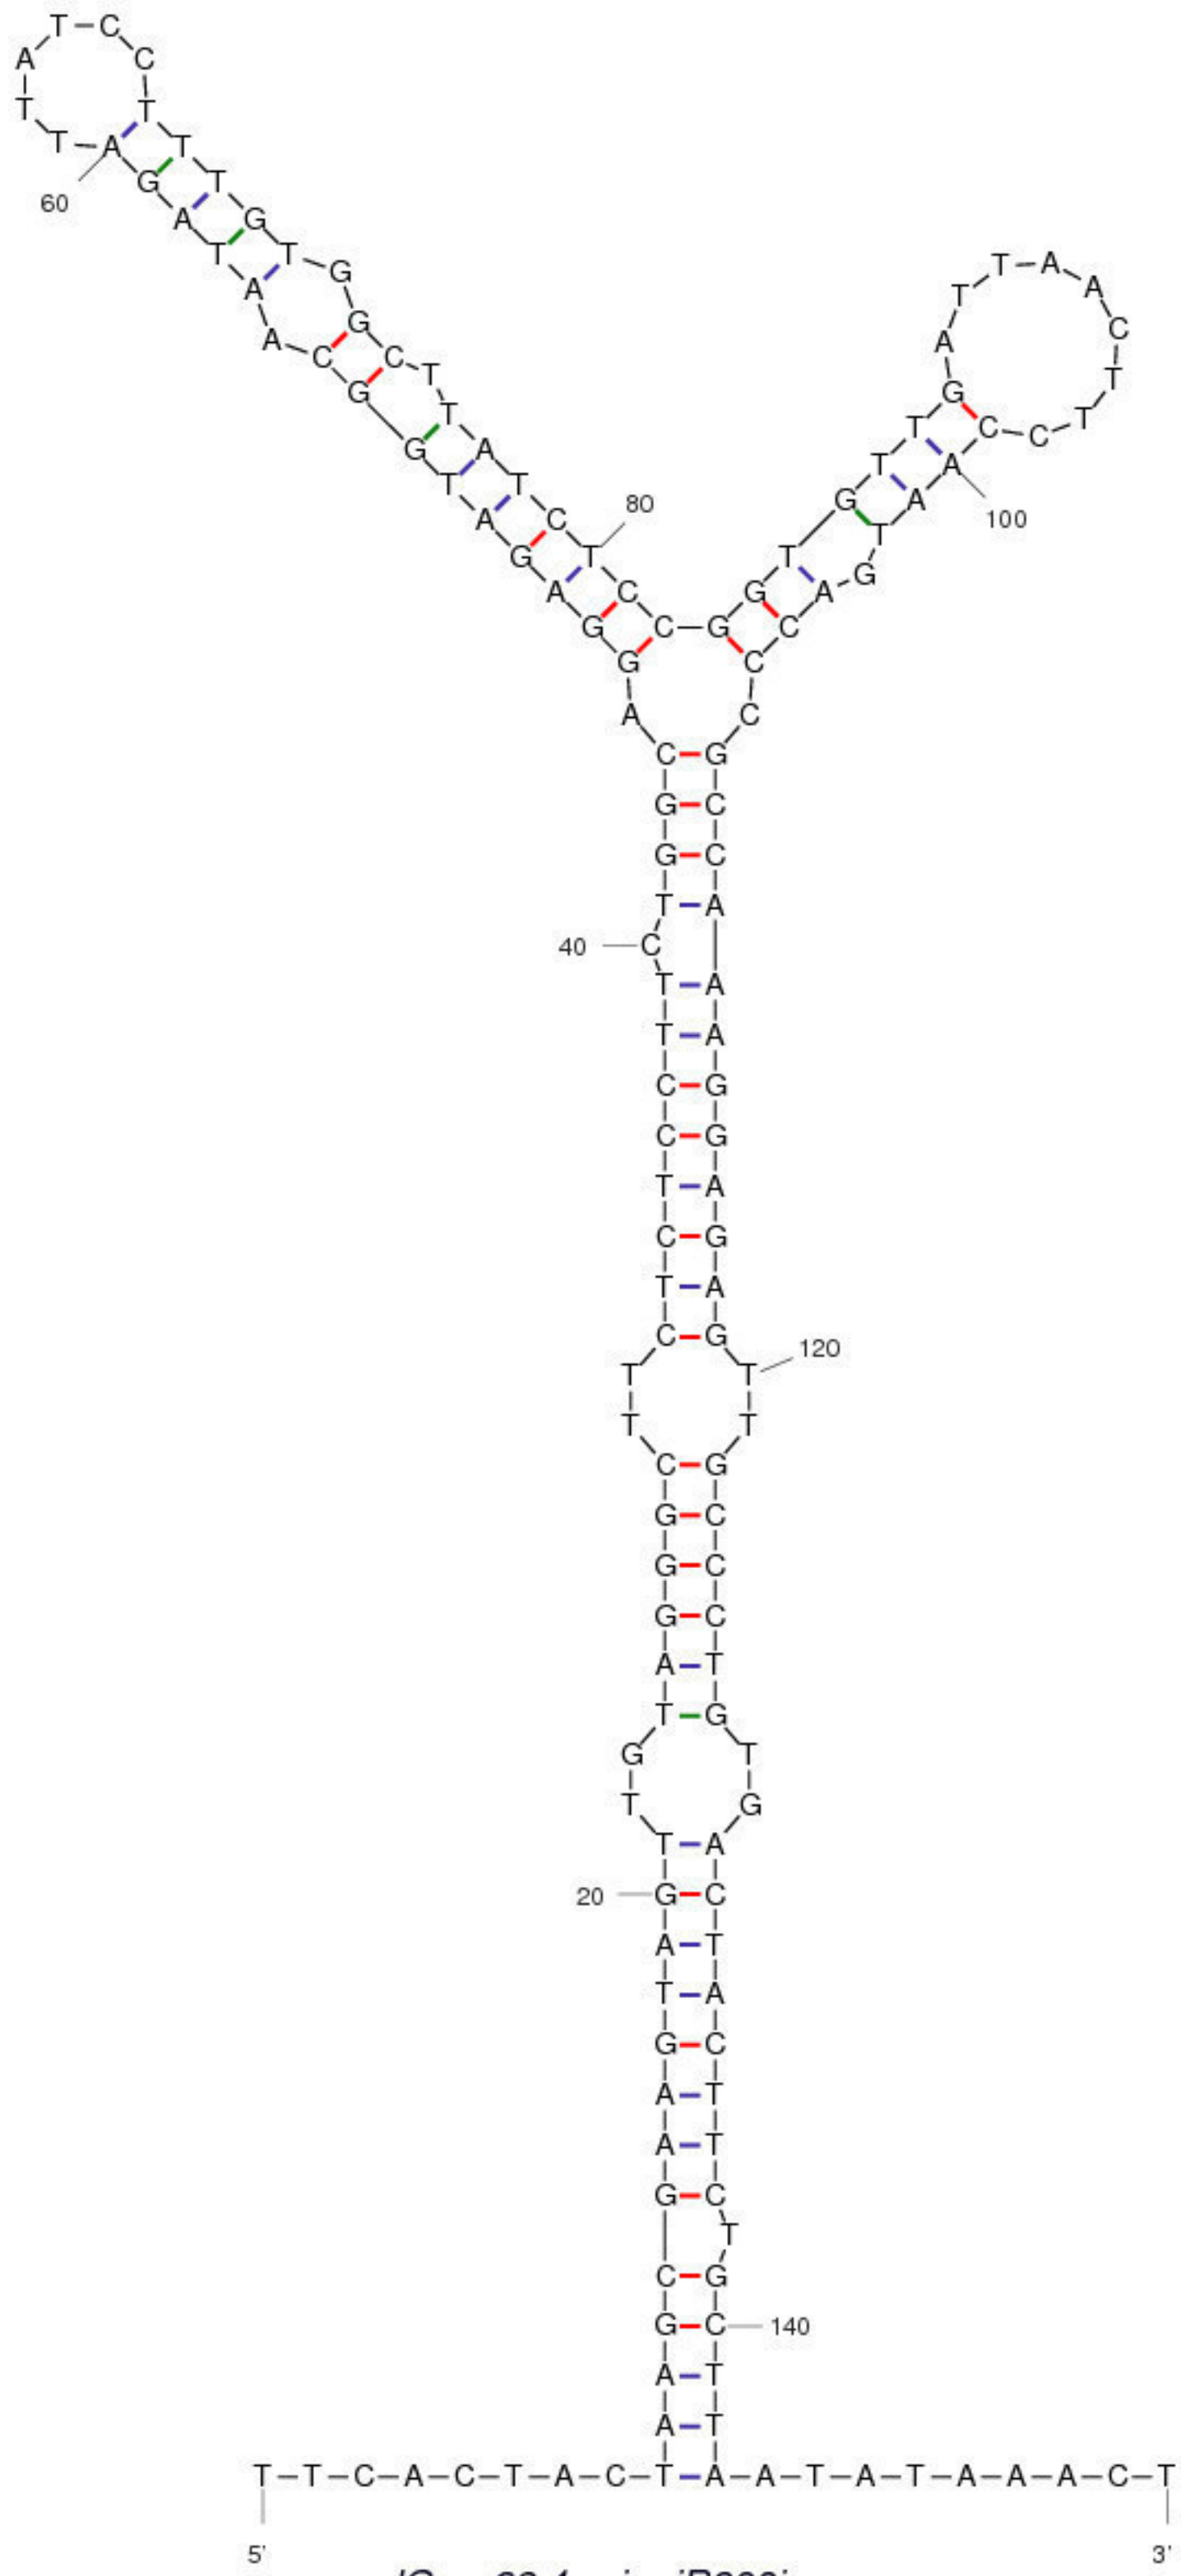

*dG = -68.4 vvi-miR399i*

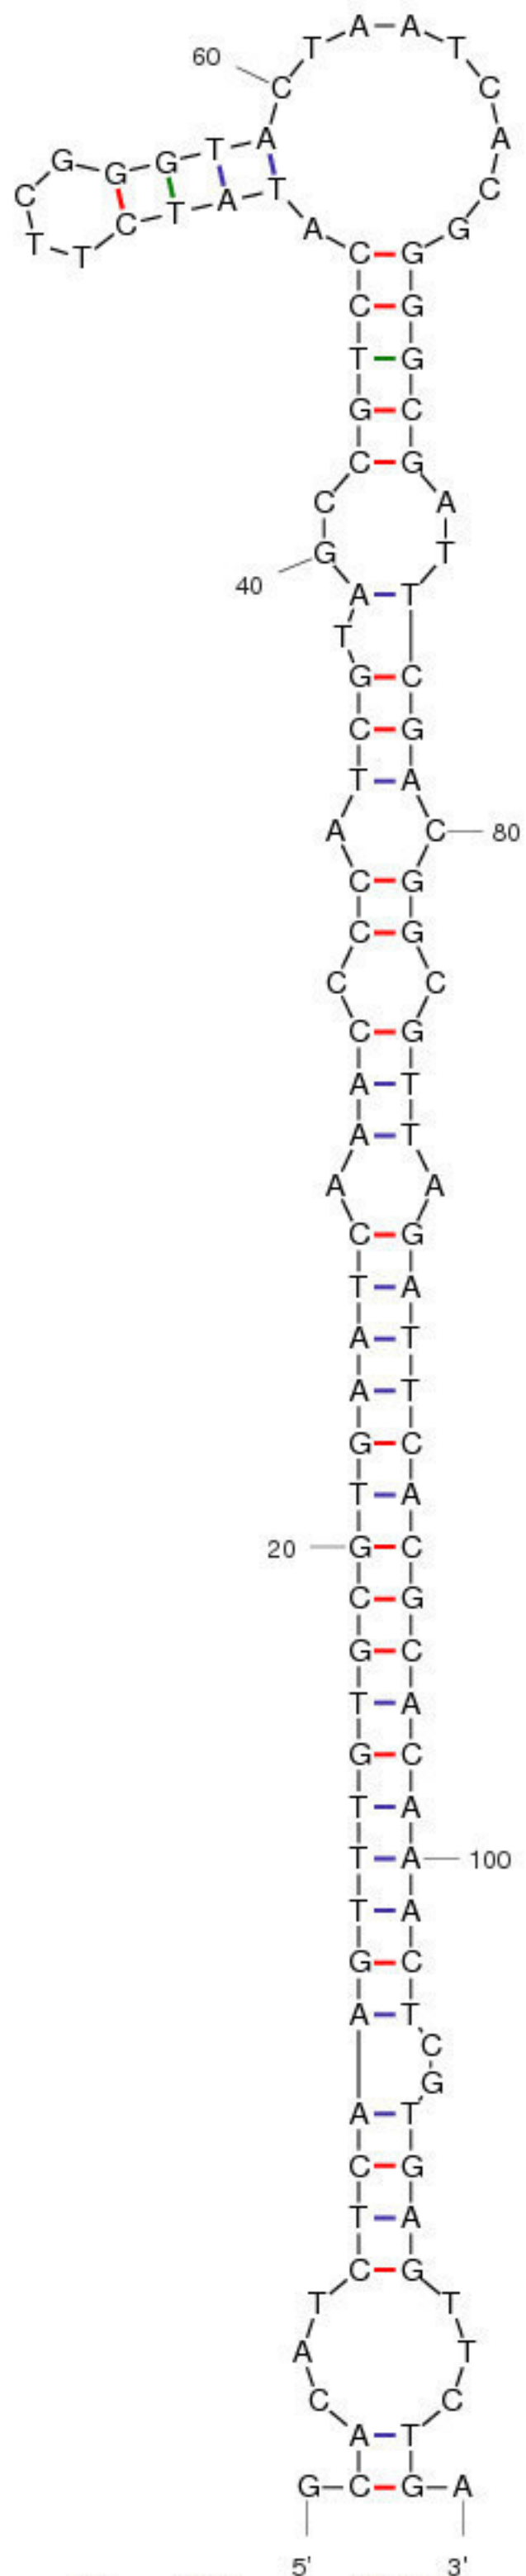

dG = -47.2 vvi-miR403a

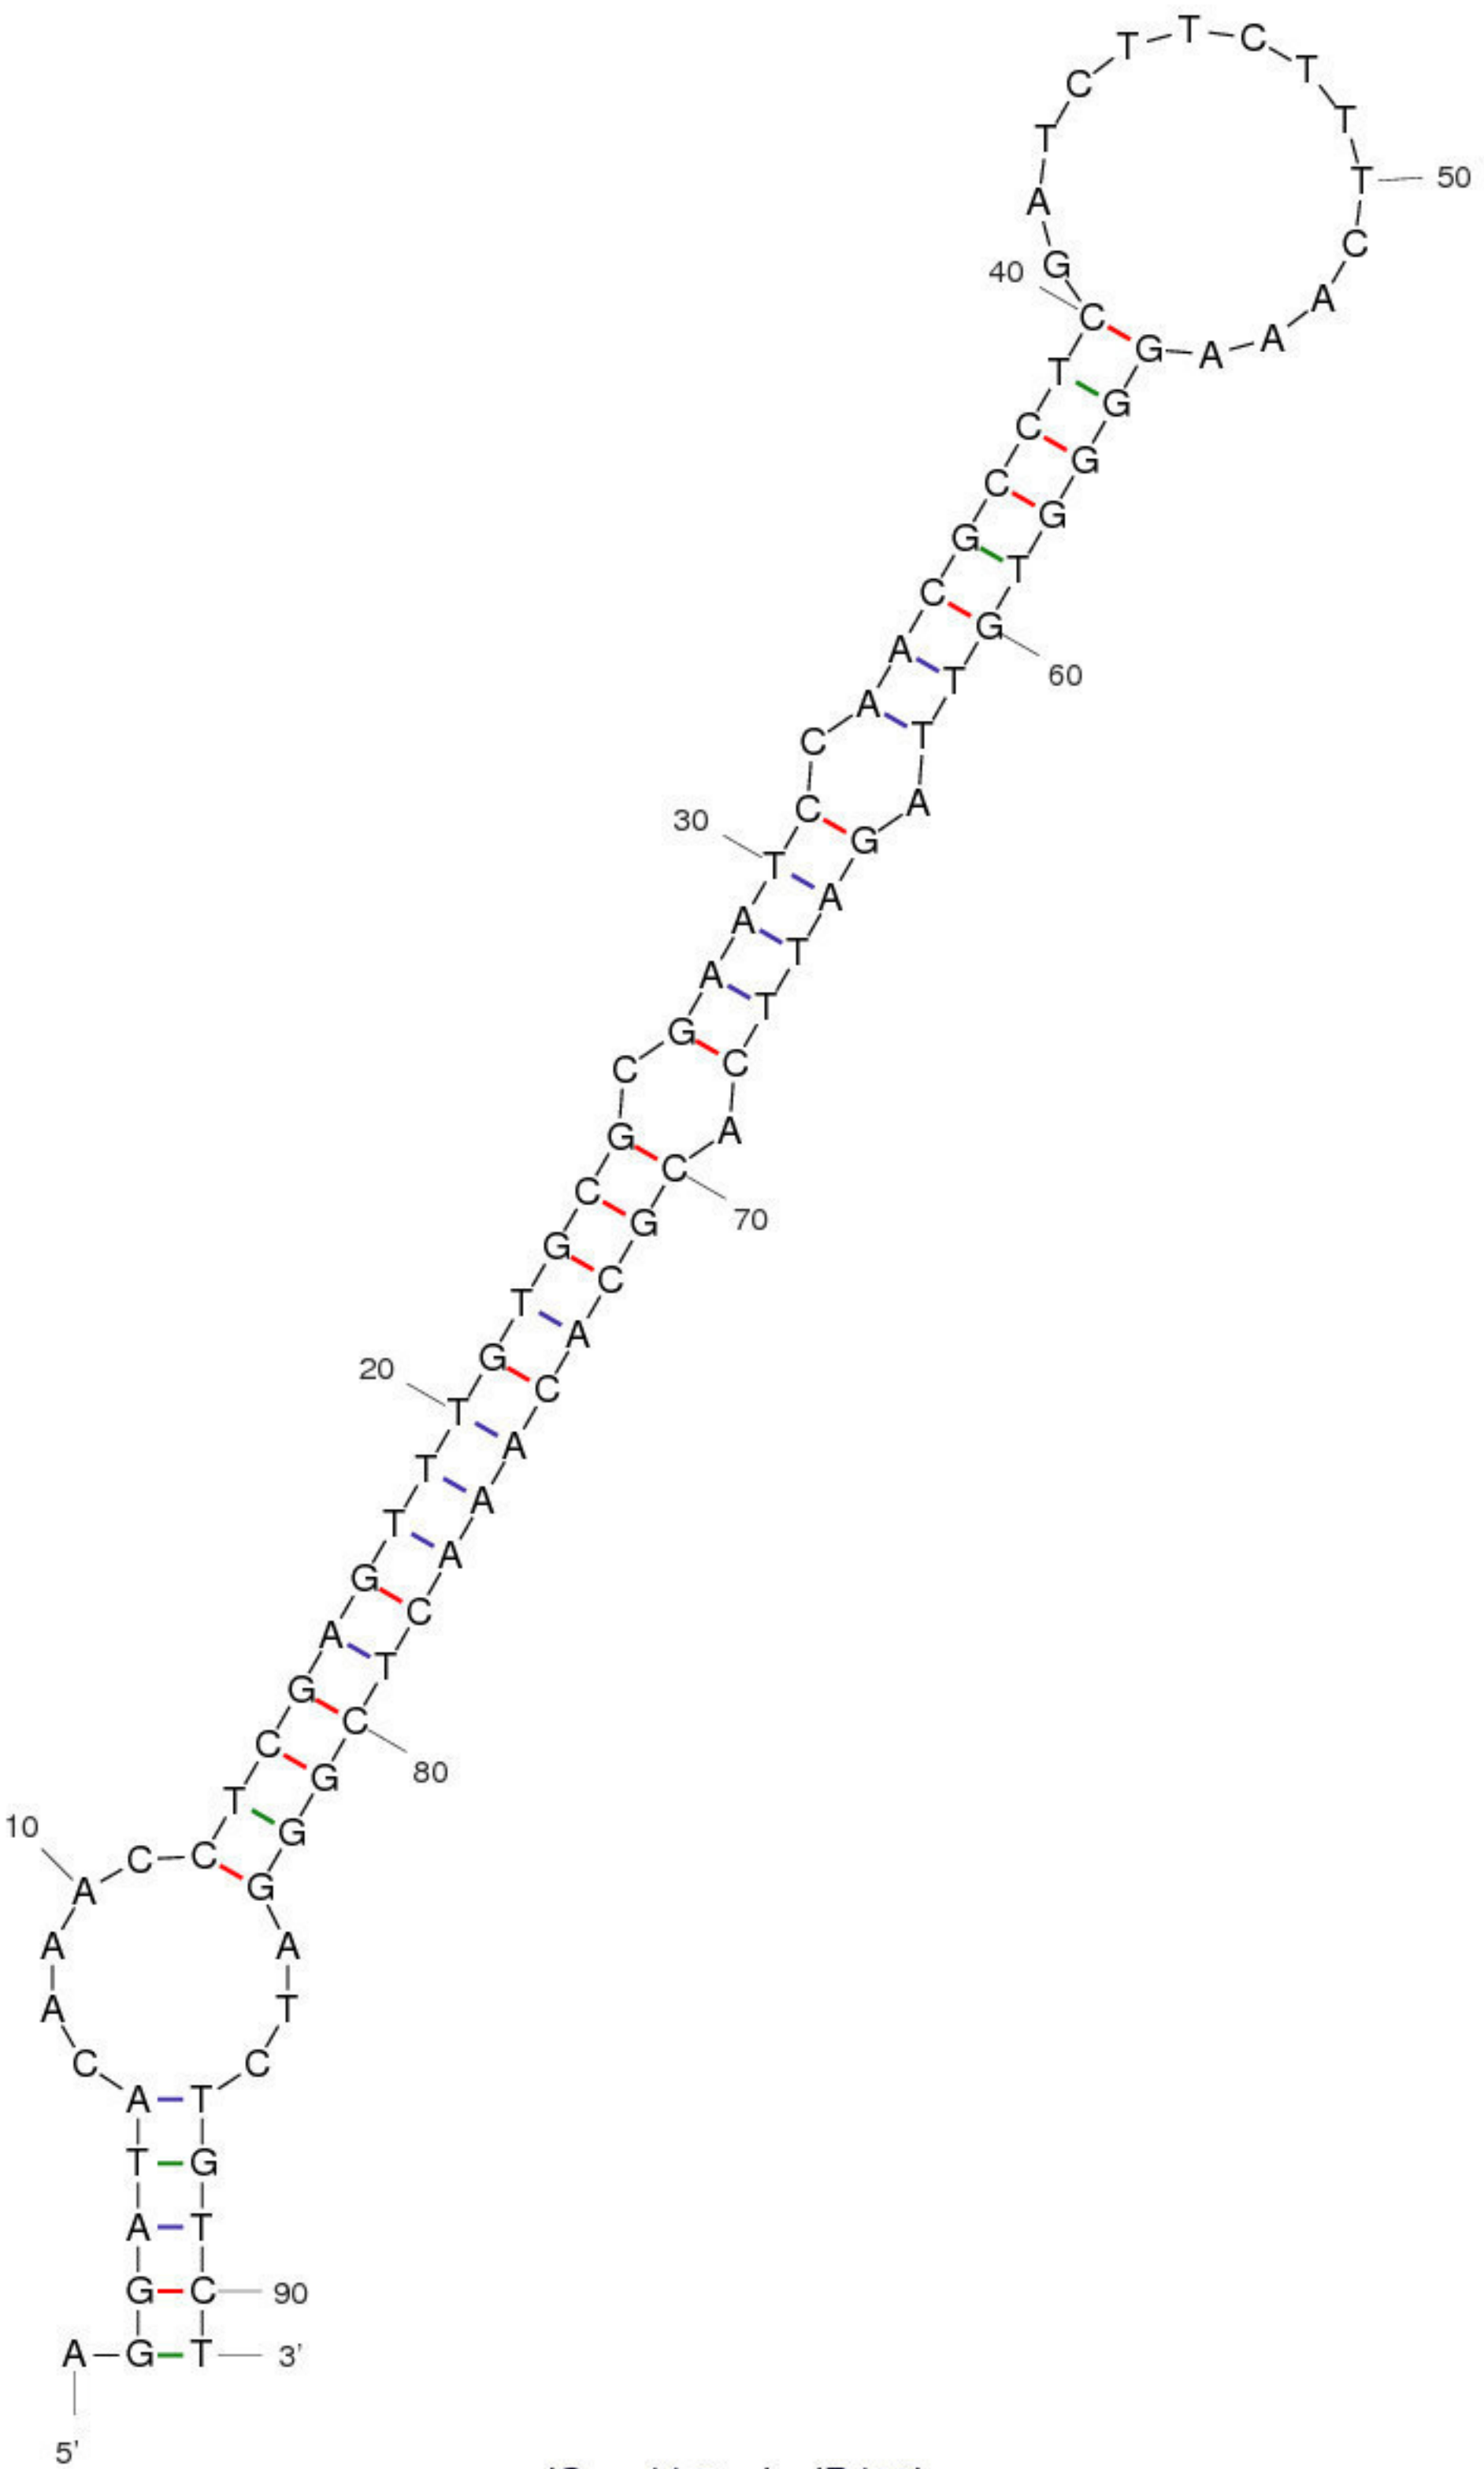

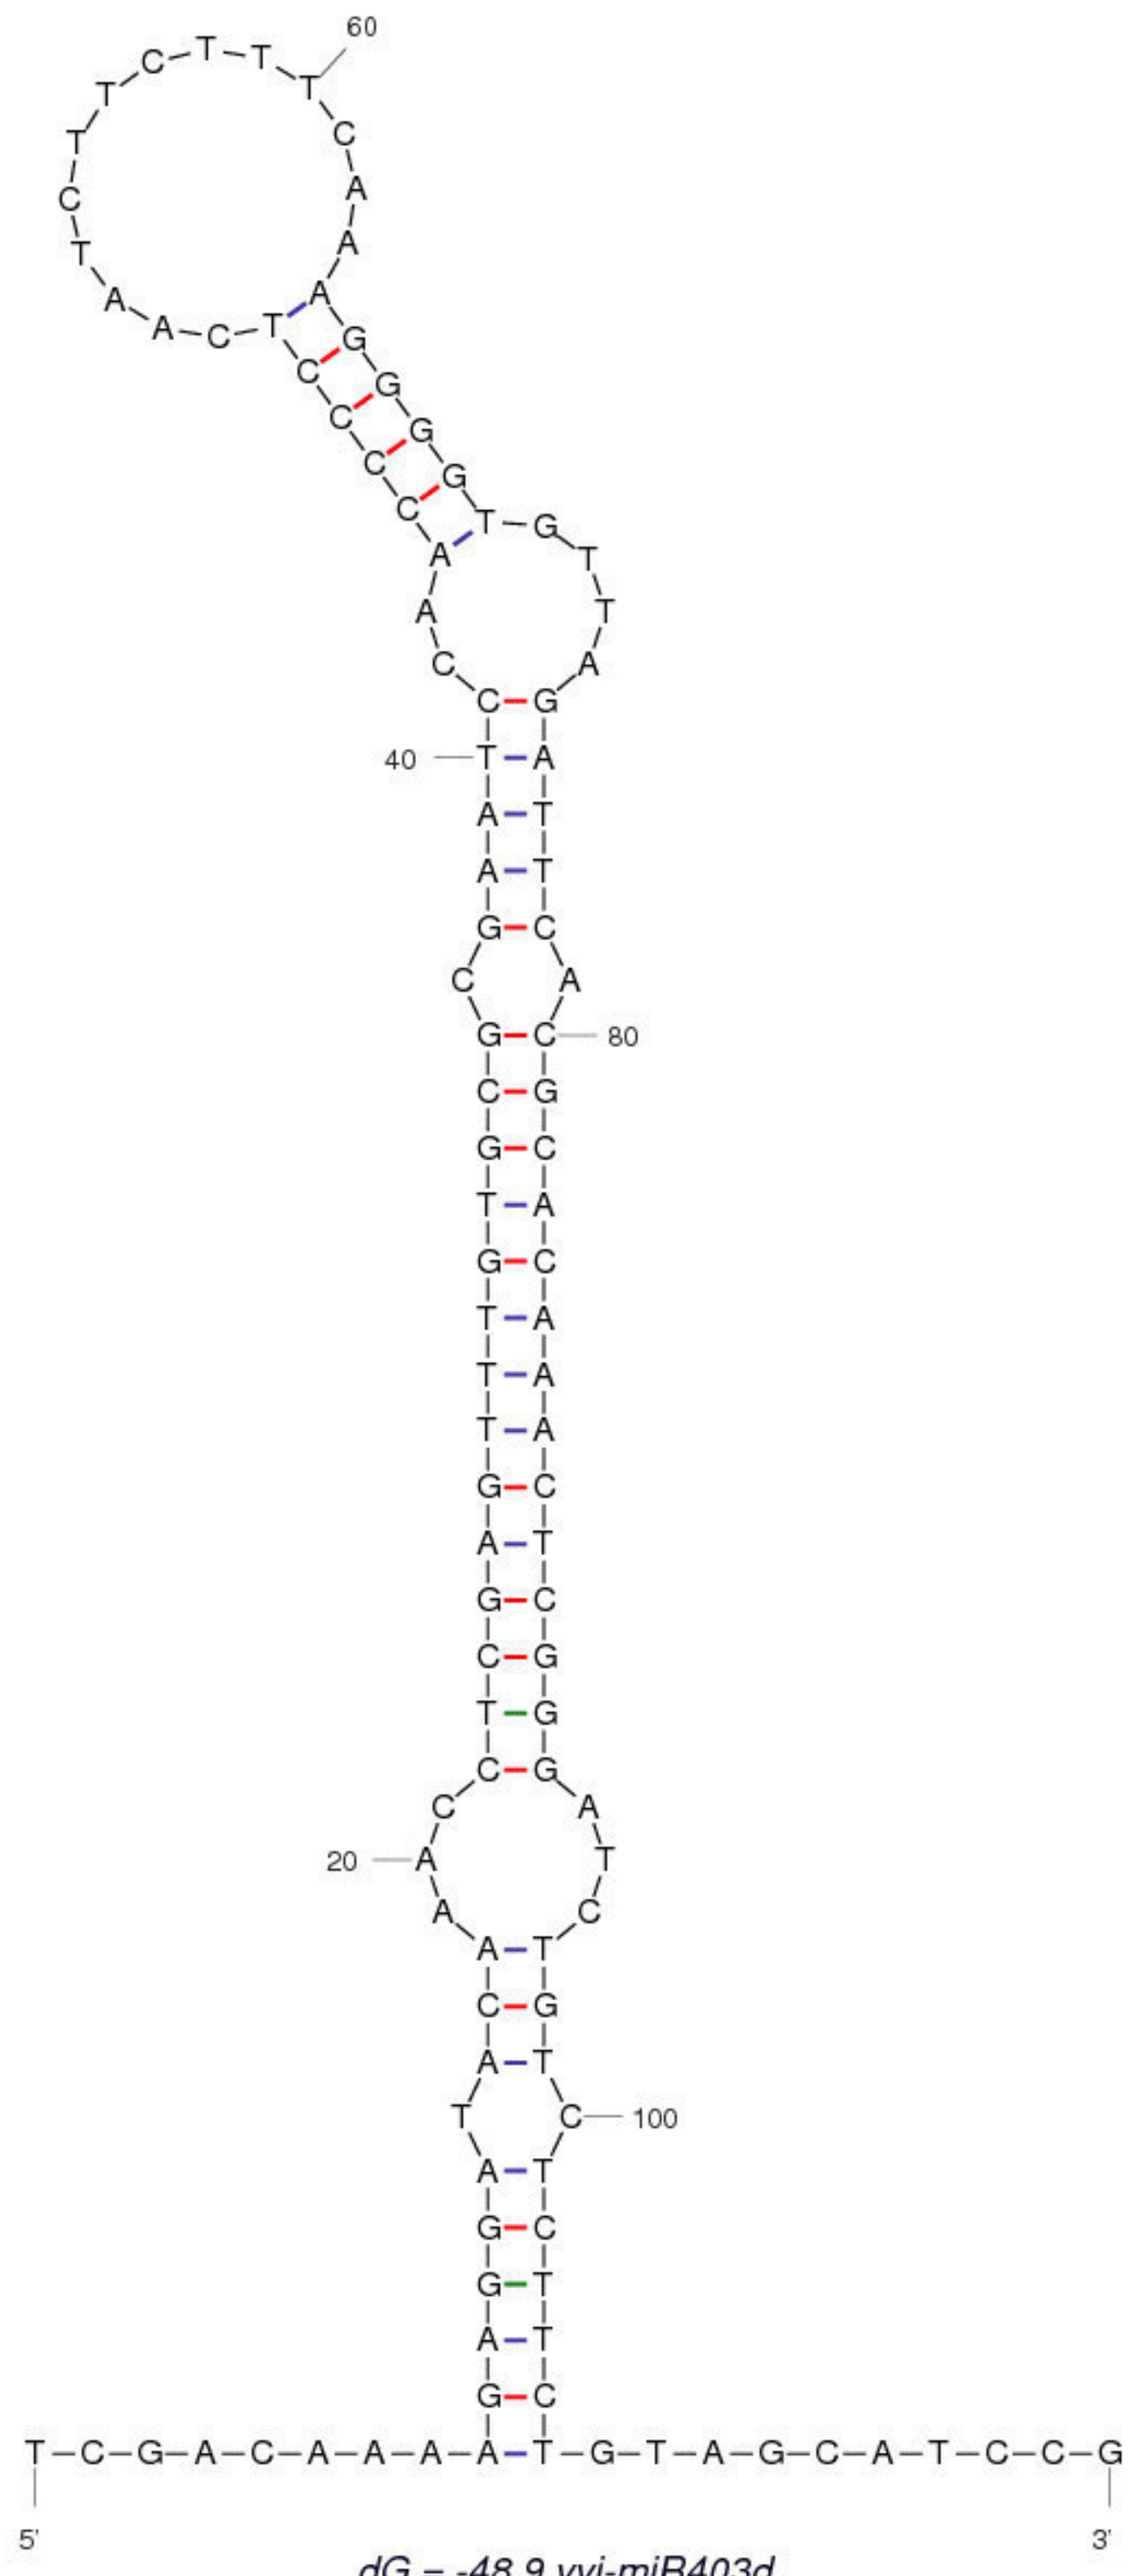

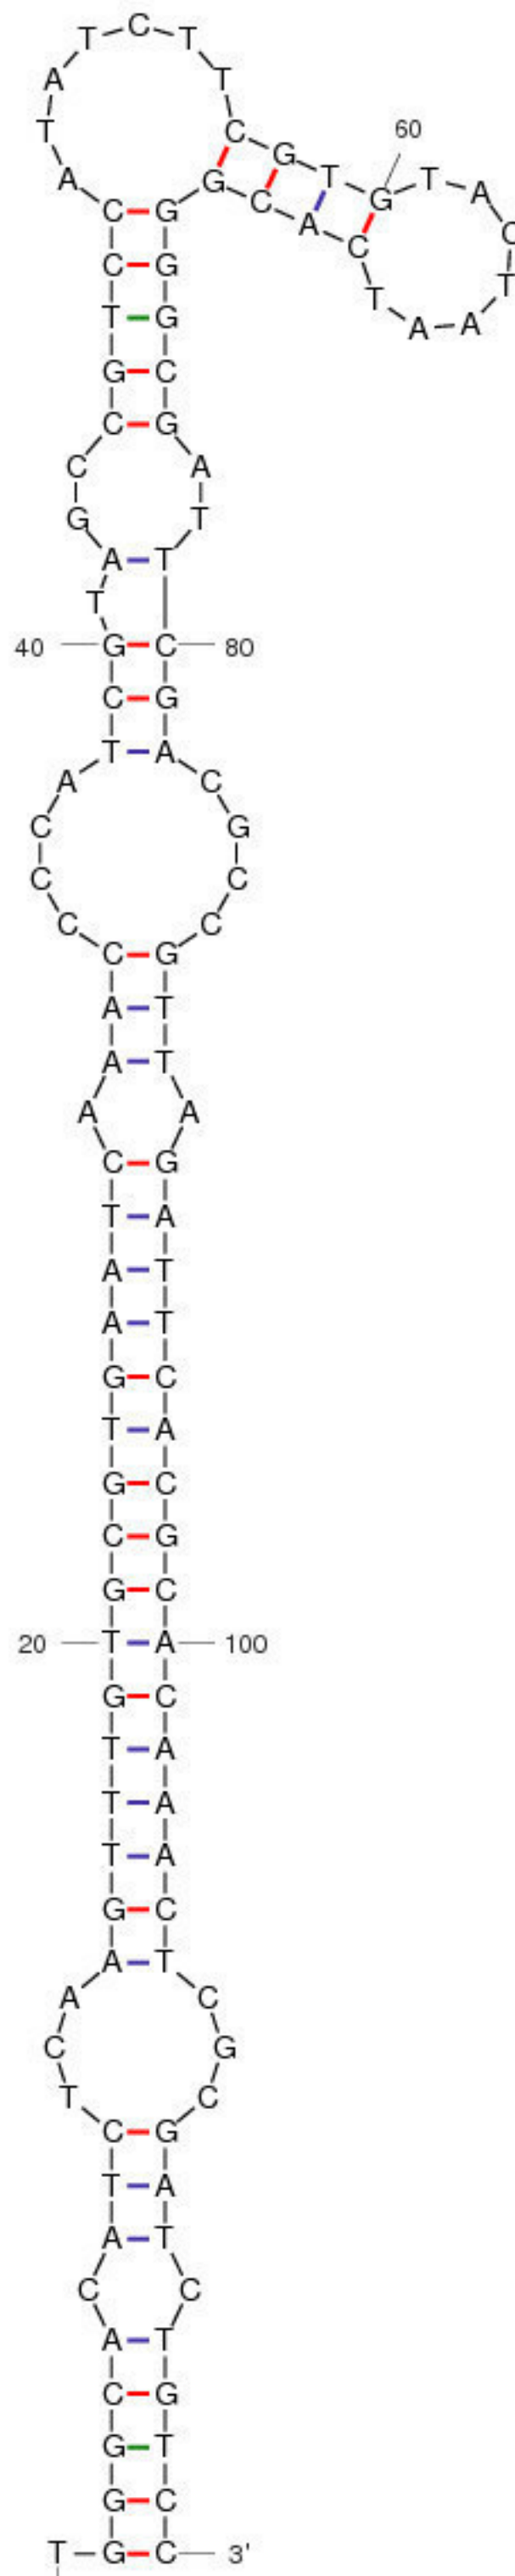

$dG = -47.3$  vvi-miR403e

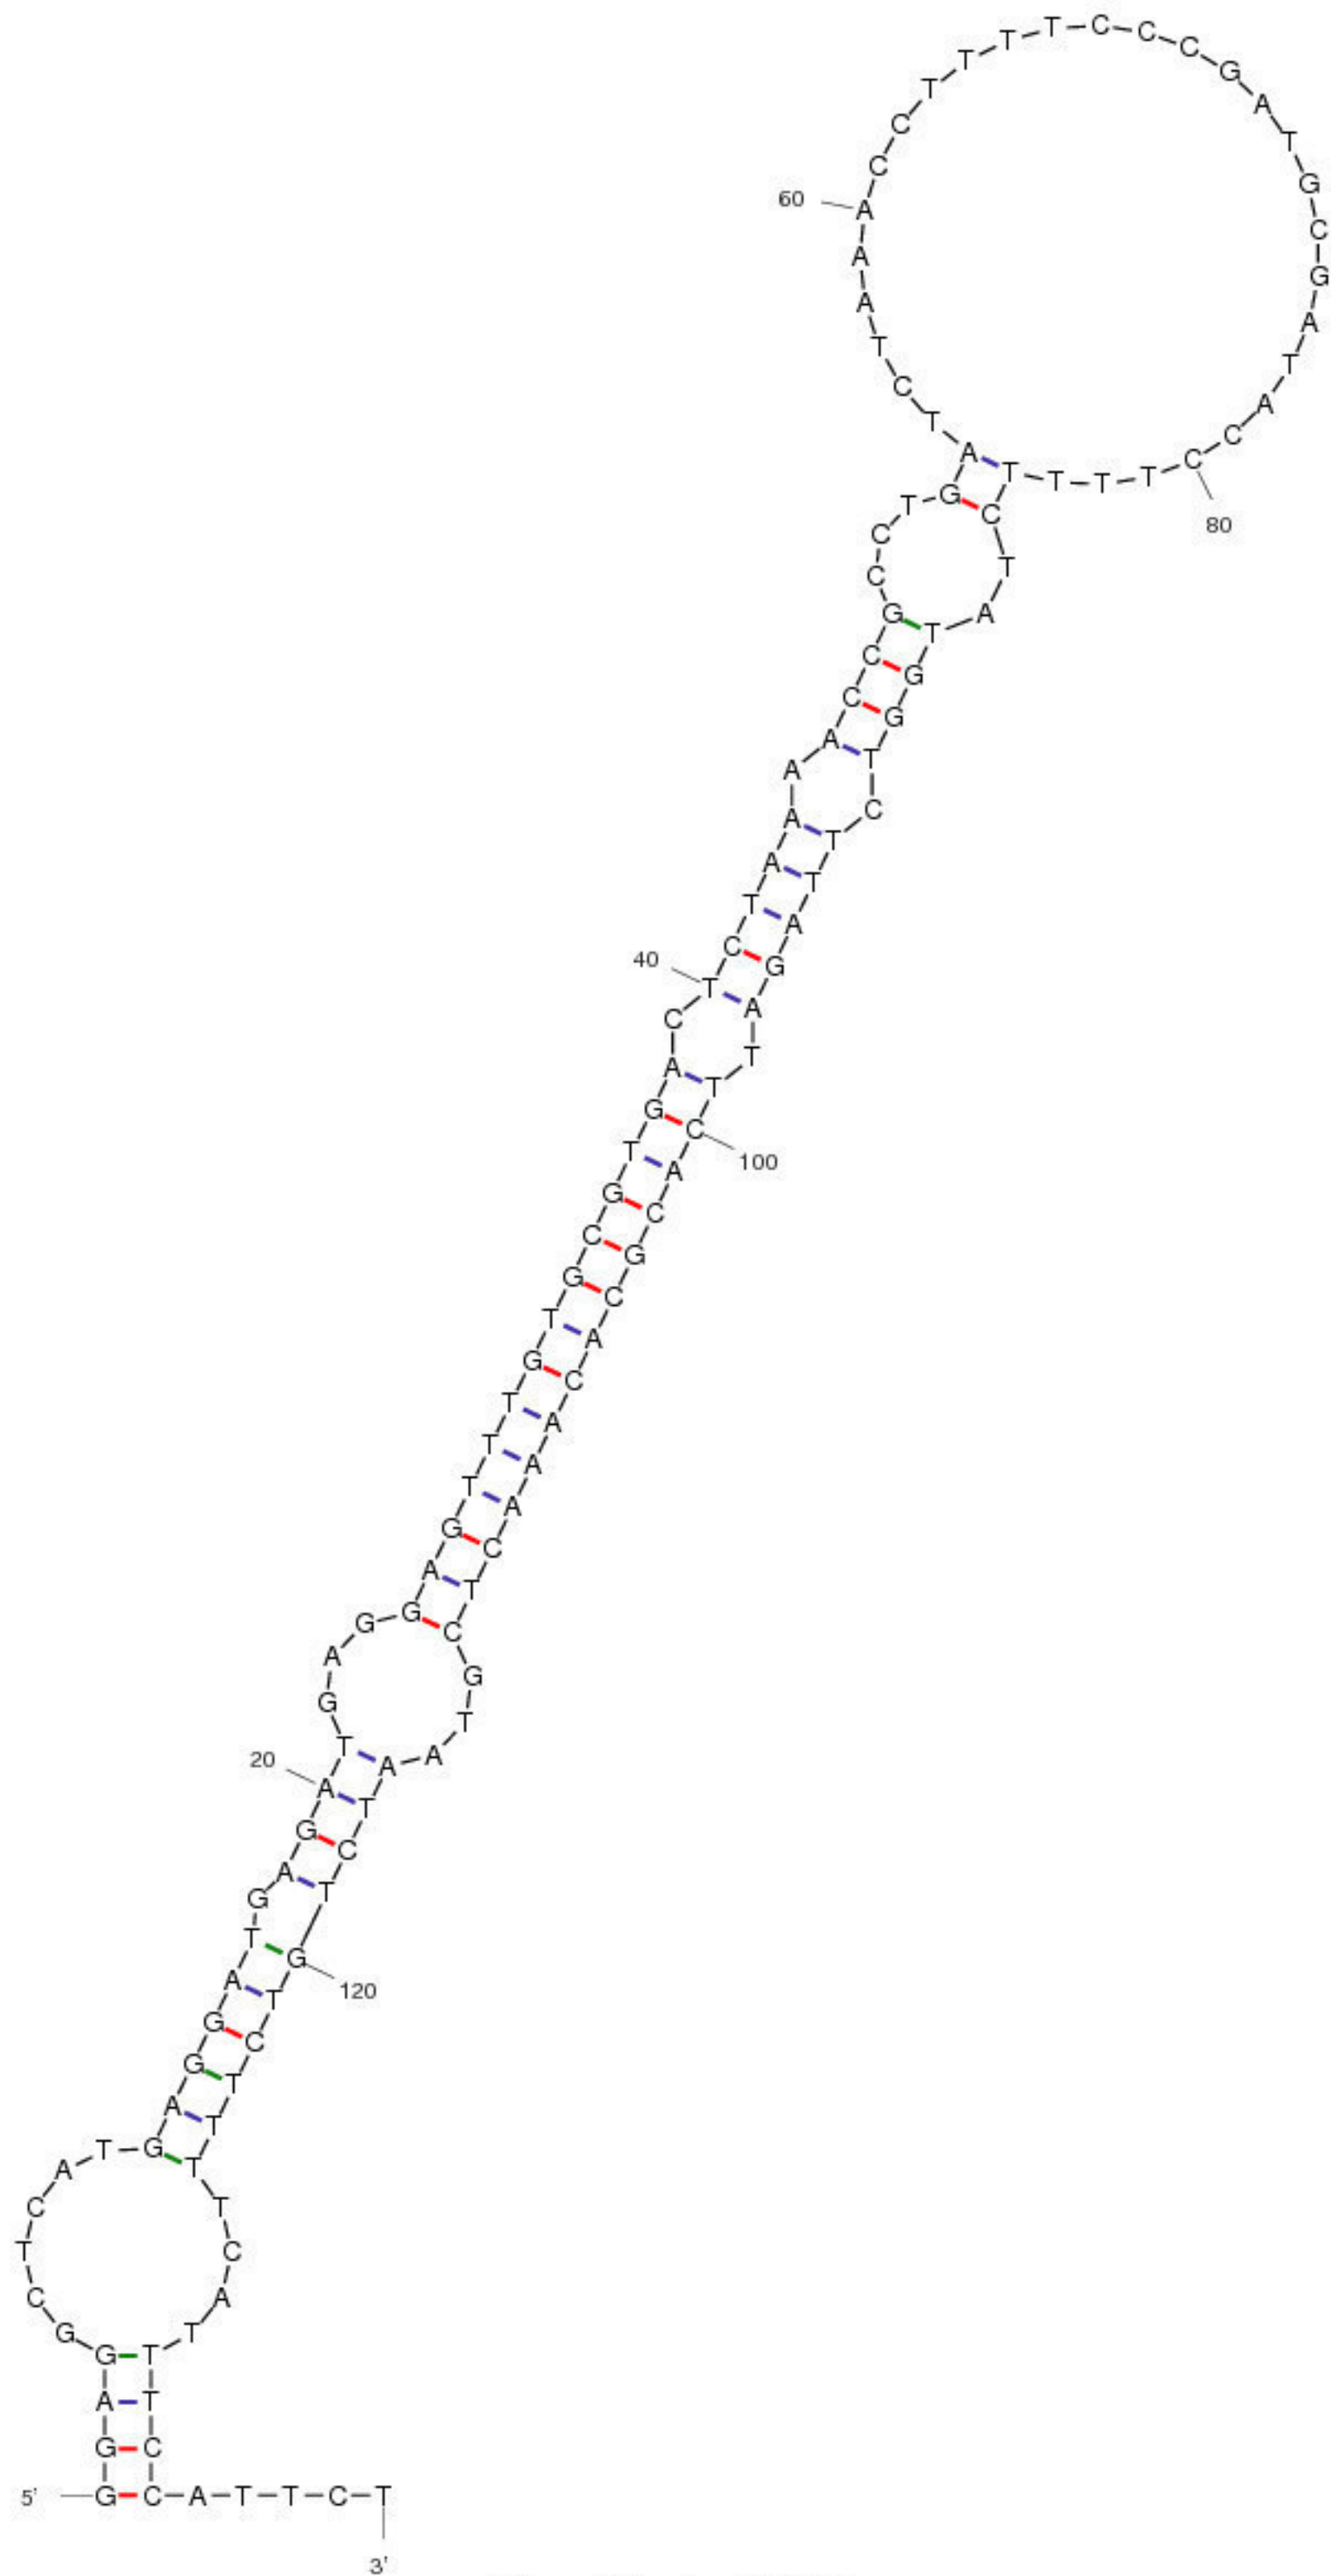

*dG = -44 vvi-miR403f*



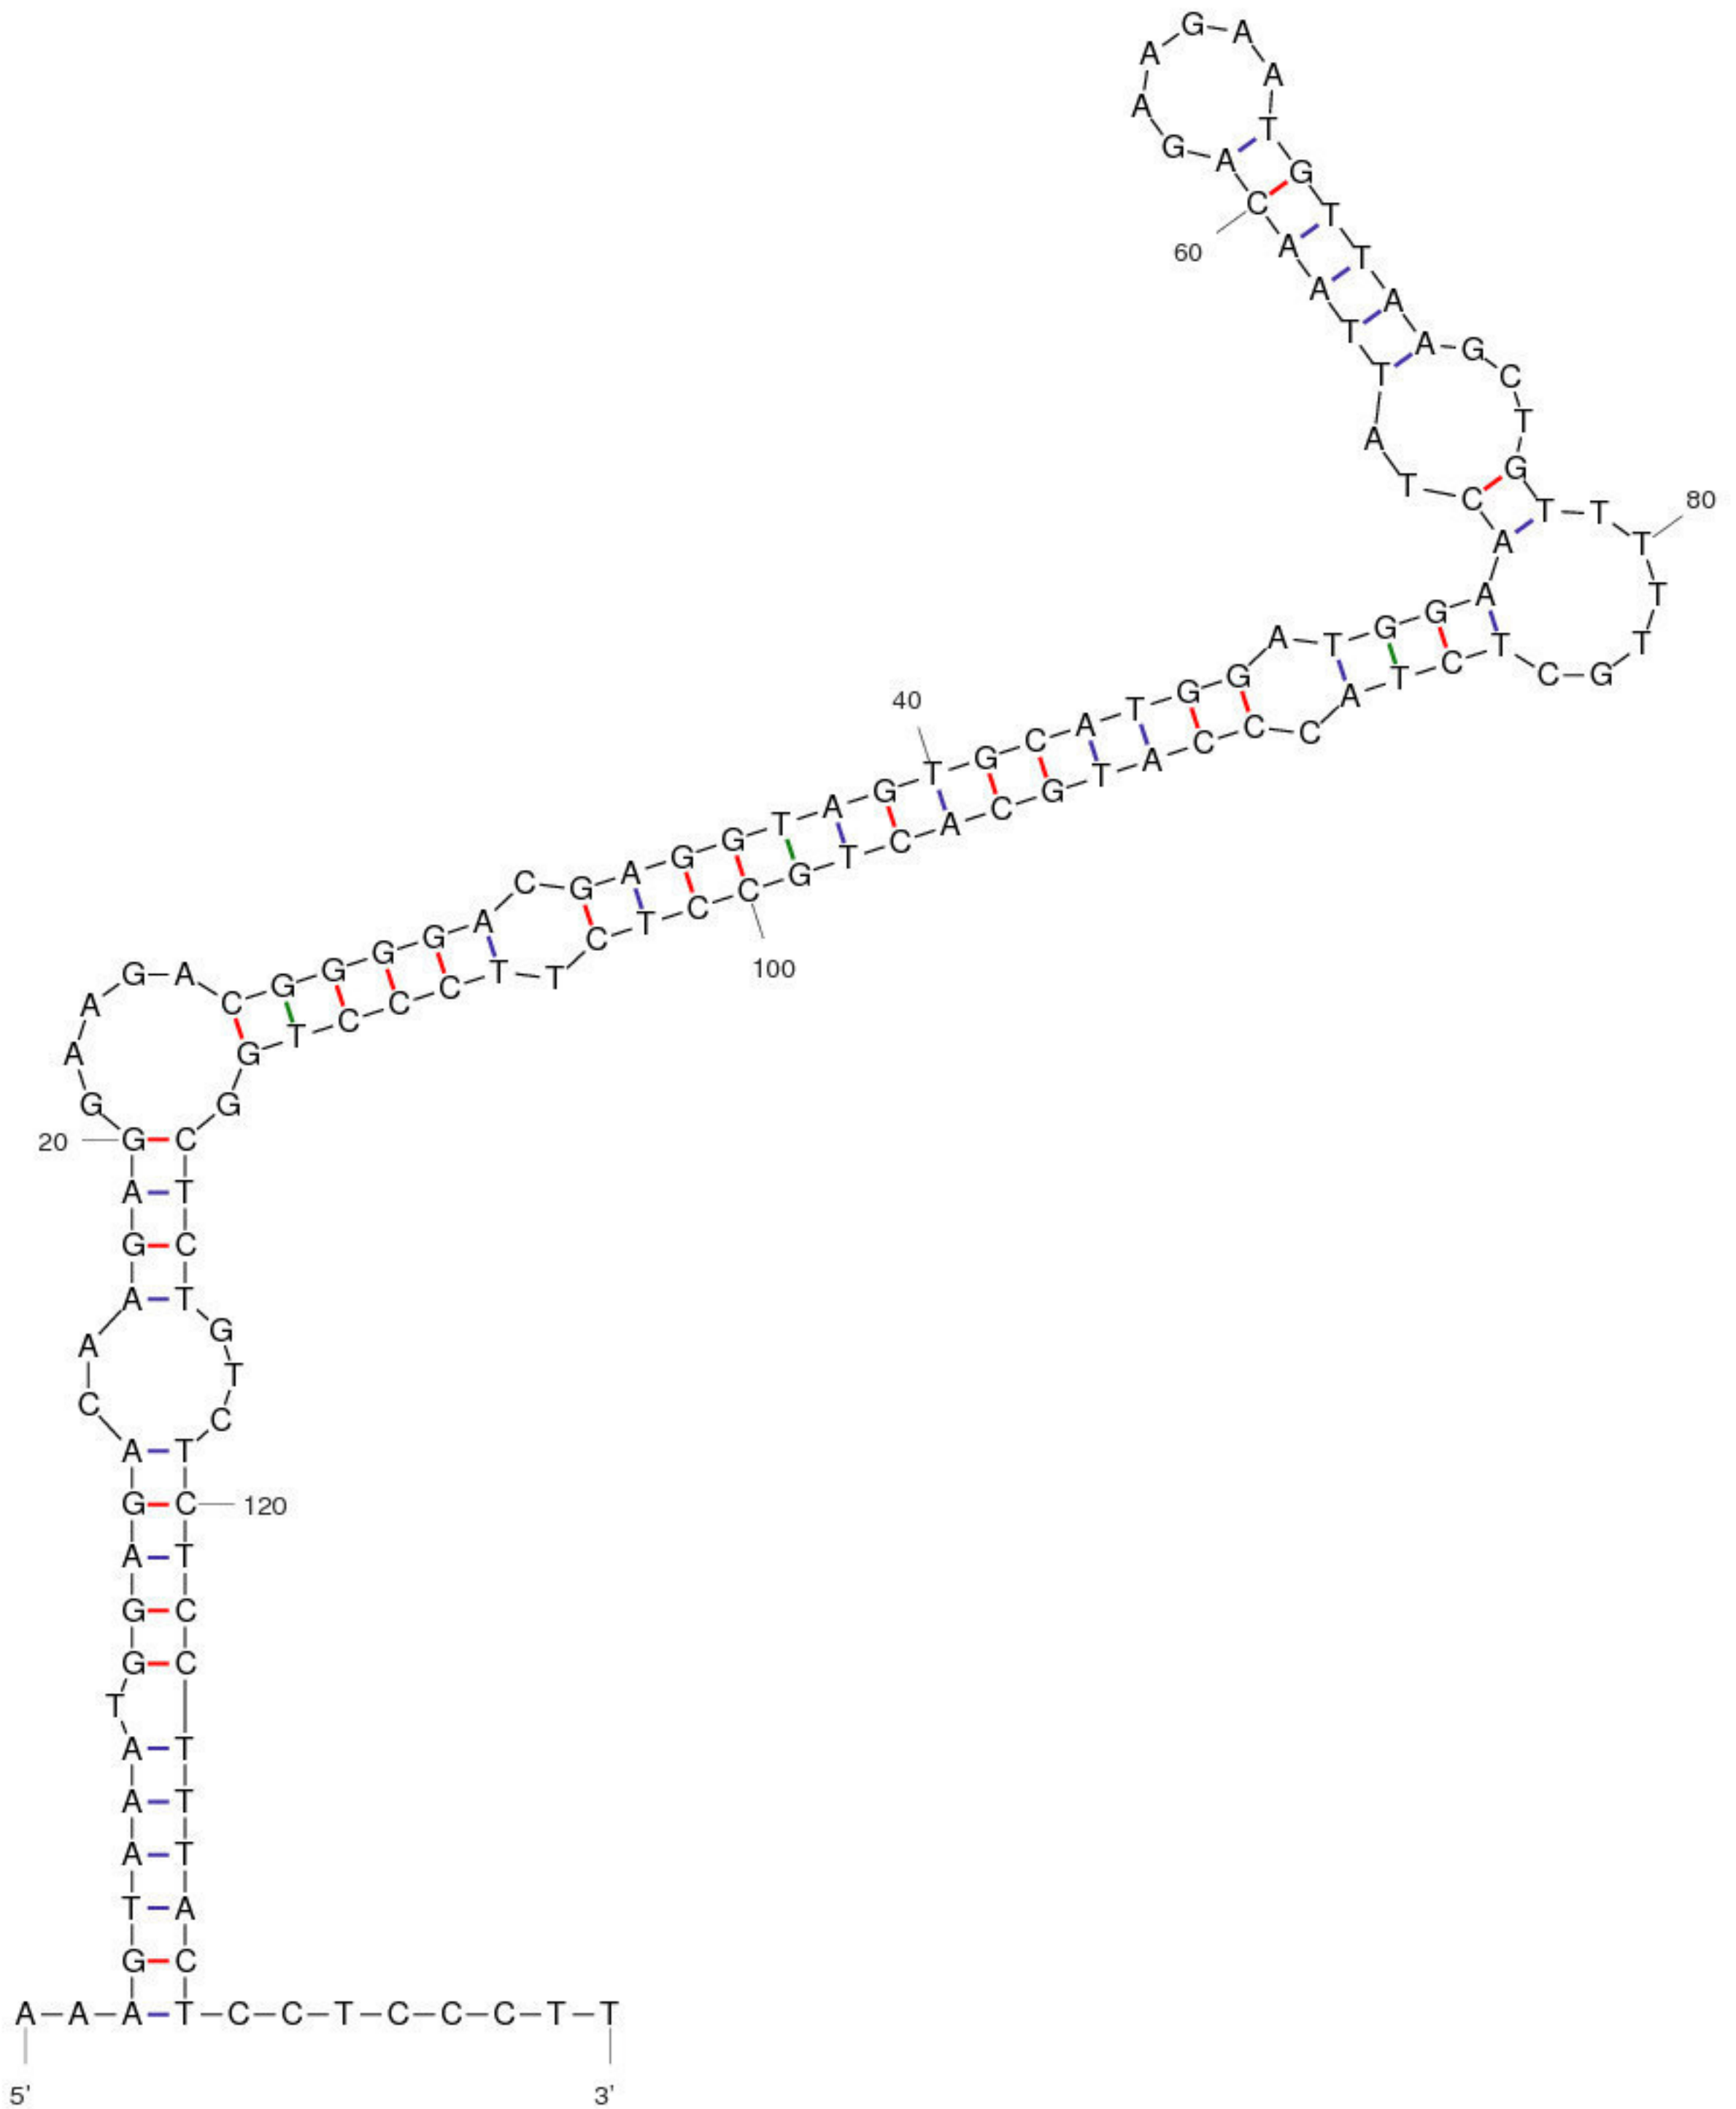

dG = -60.3 vvi-miR408

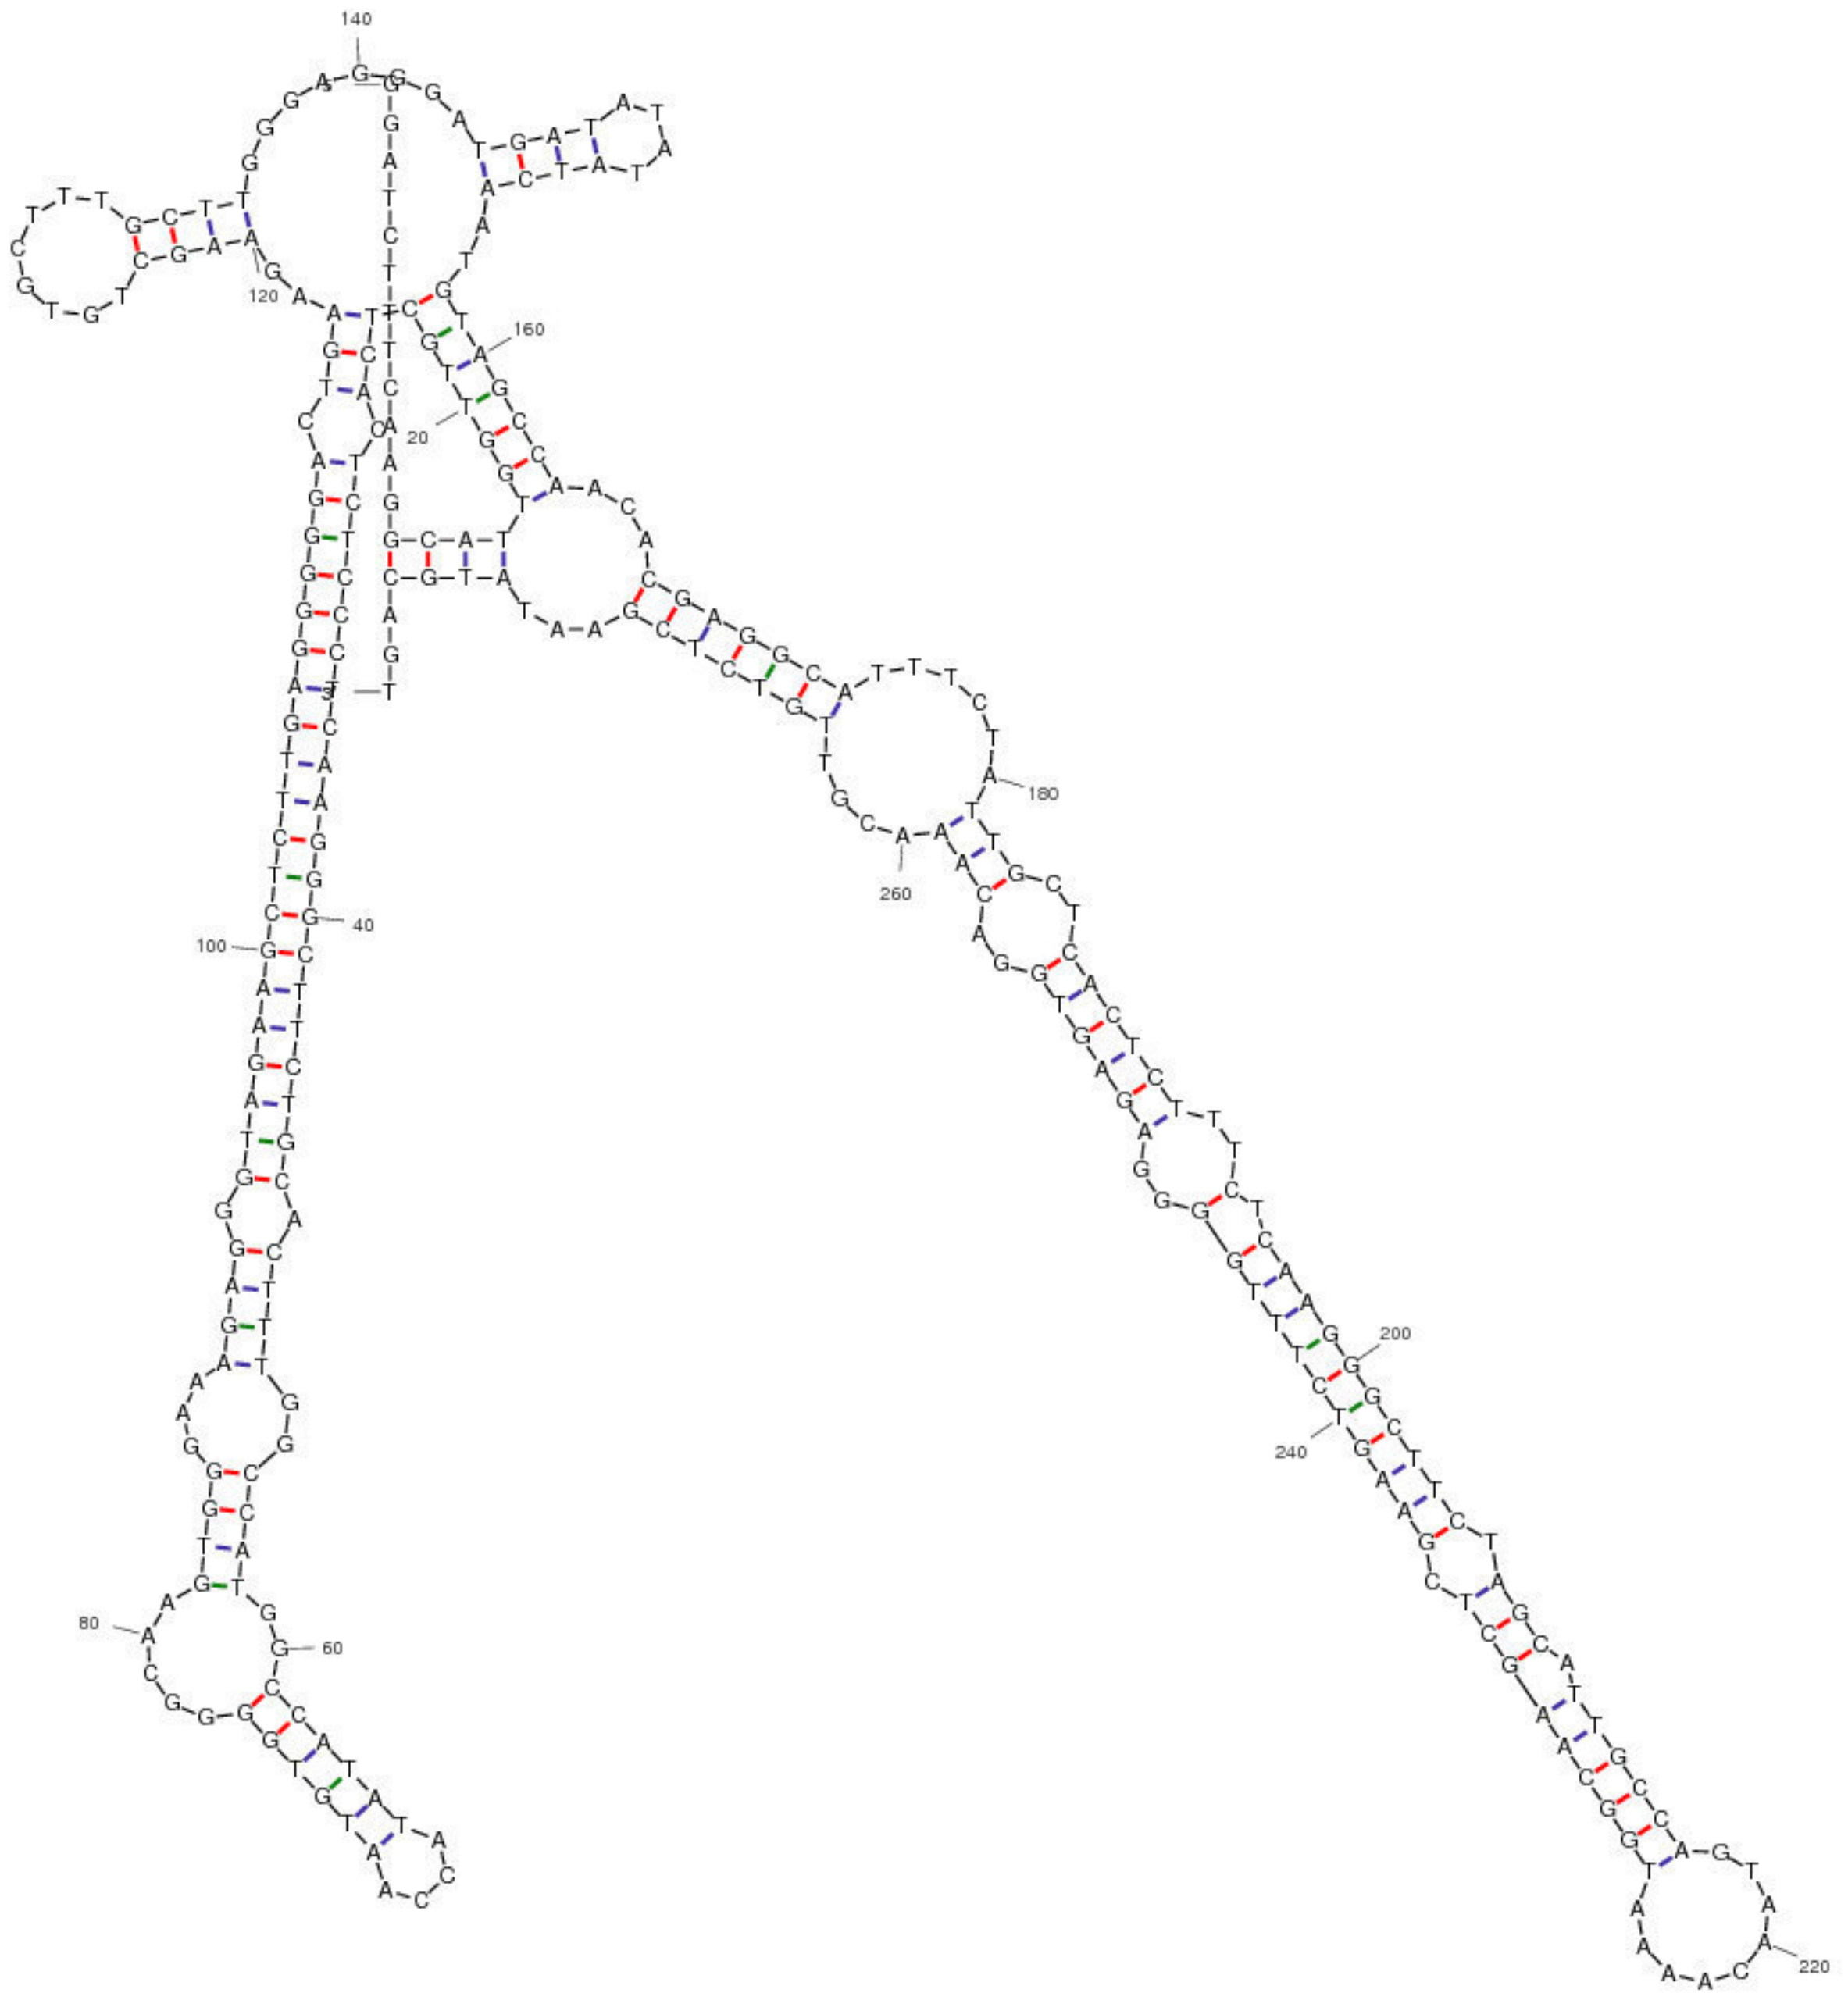

$dG = -119.9$  vvi-miR477b

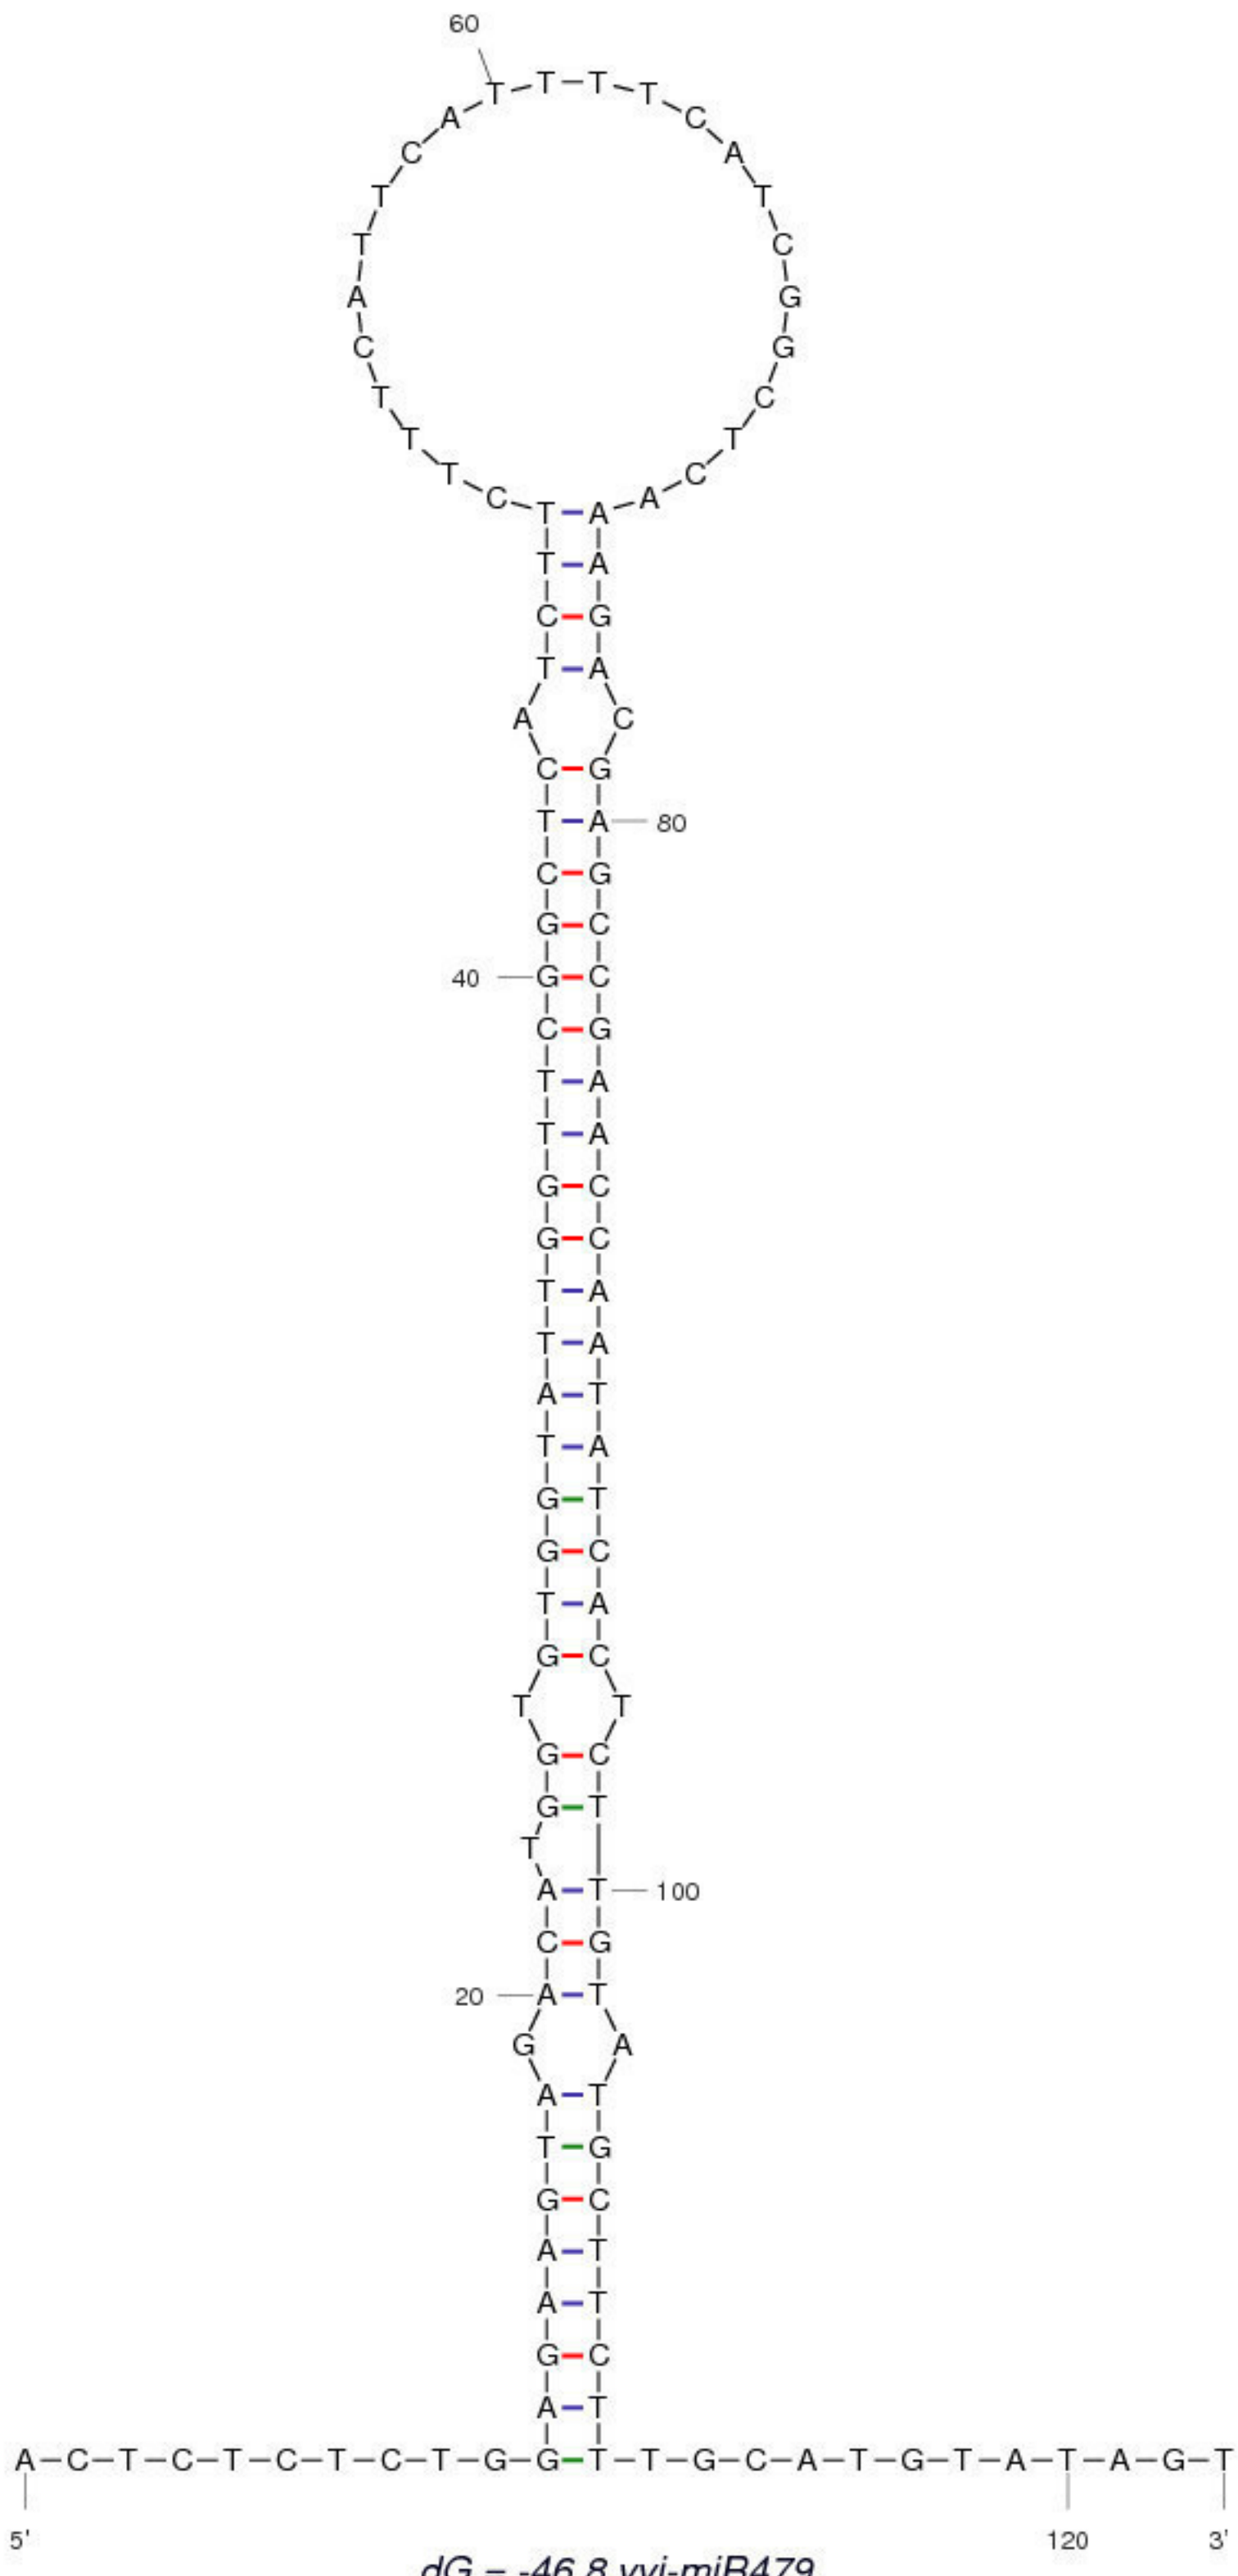

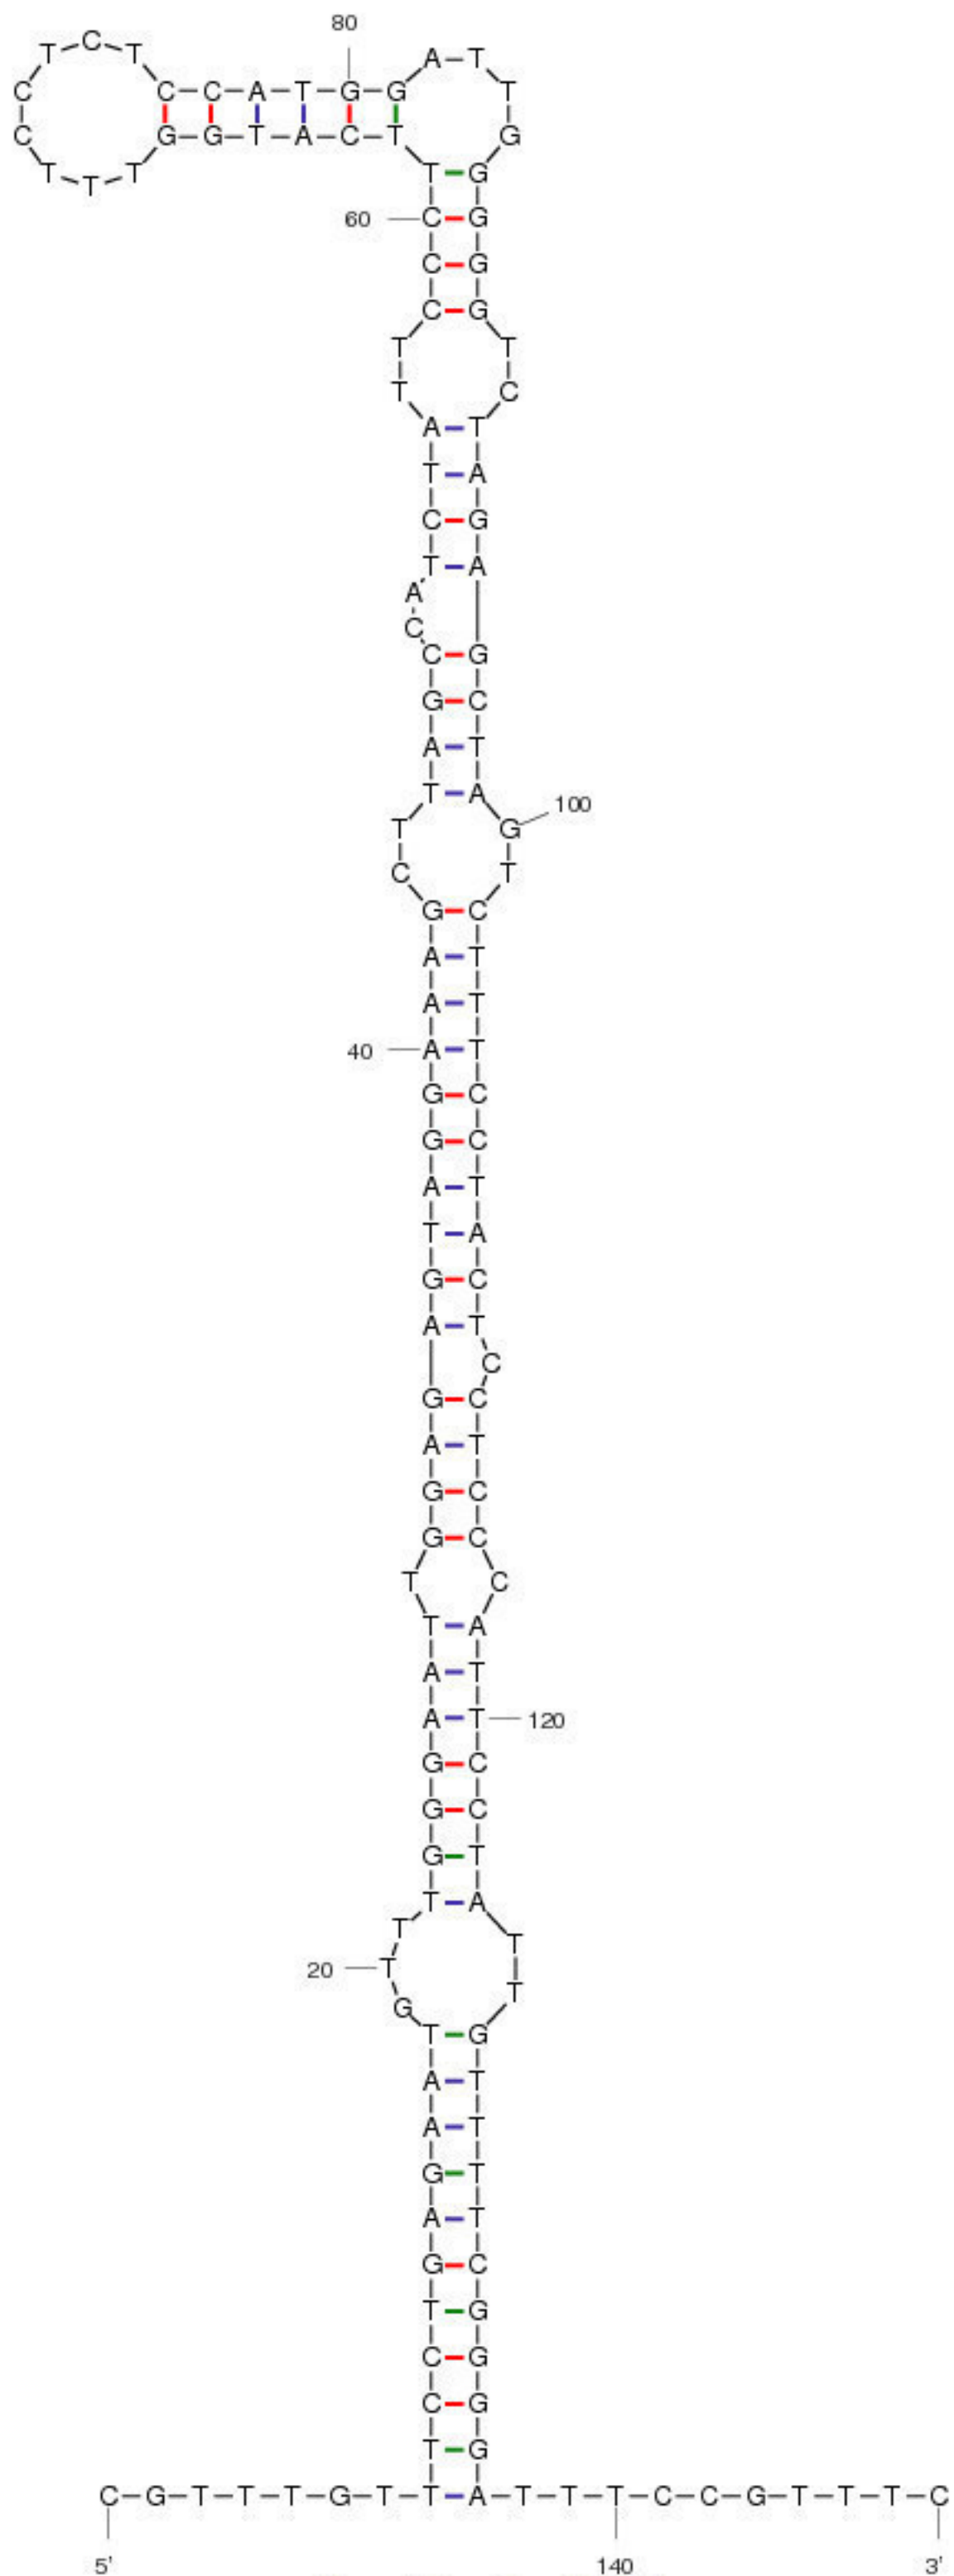

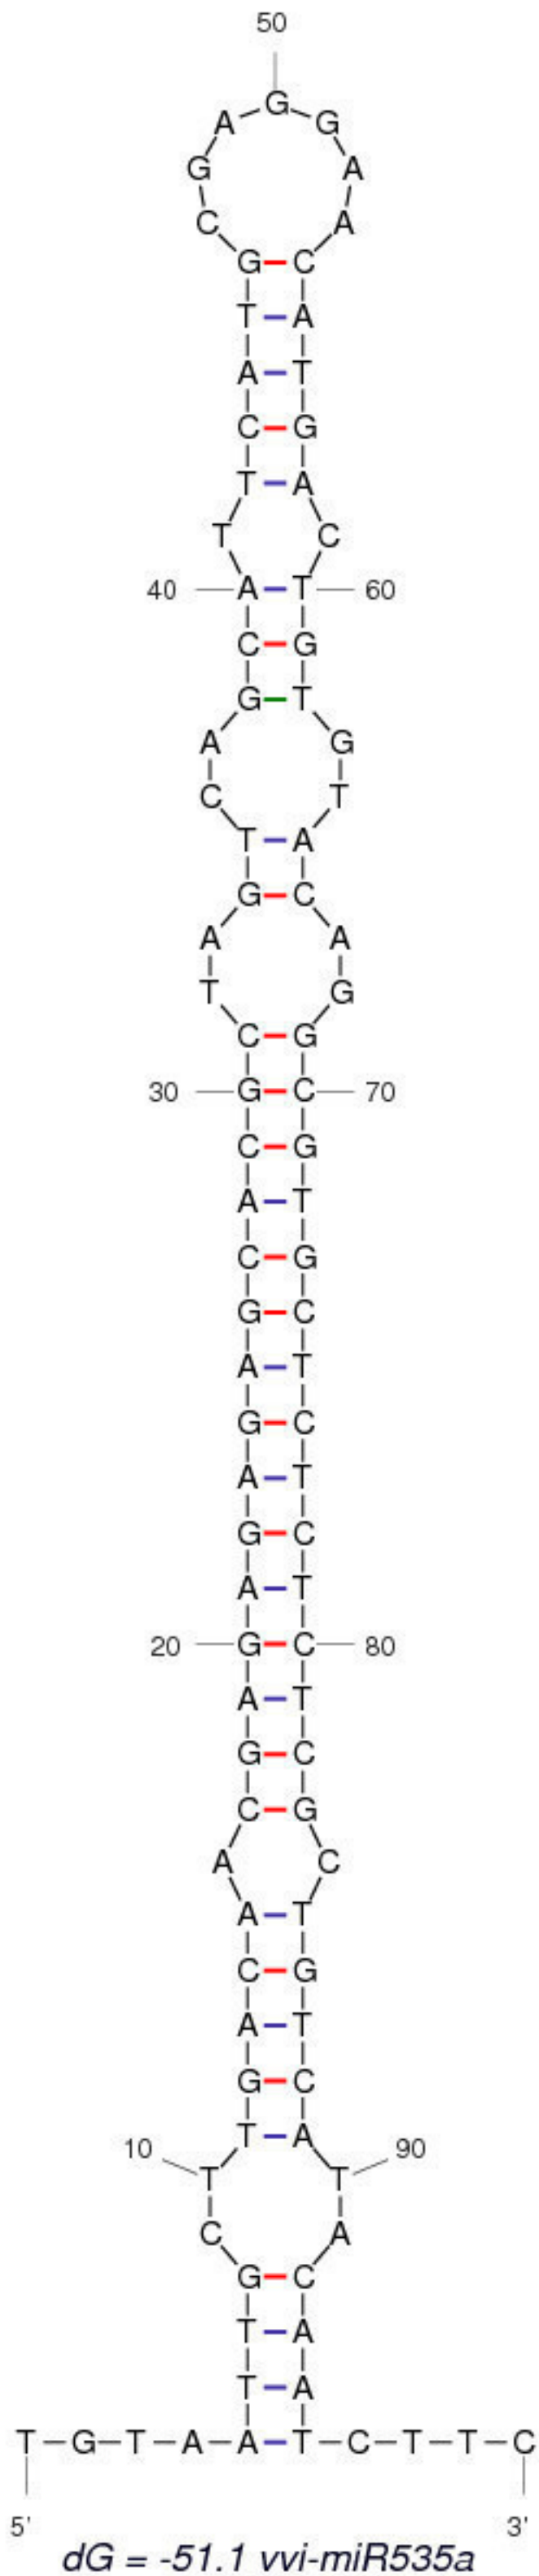

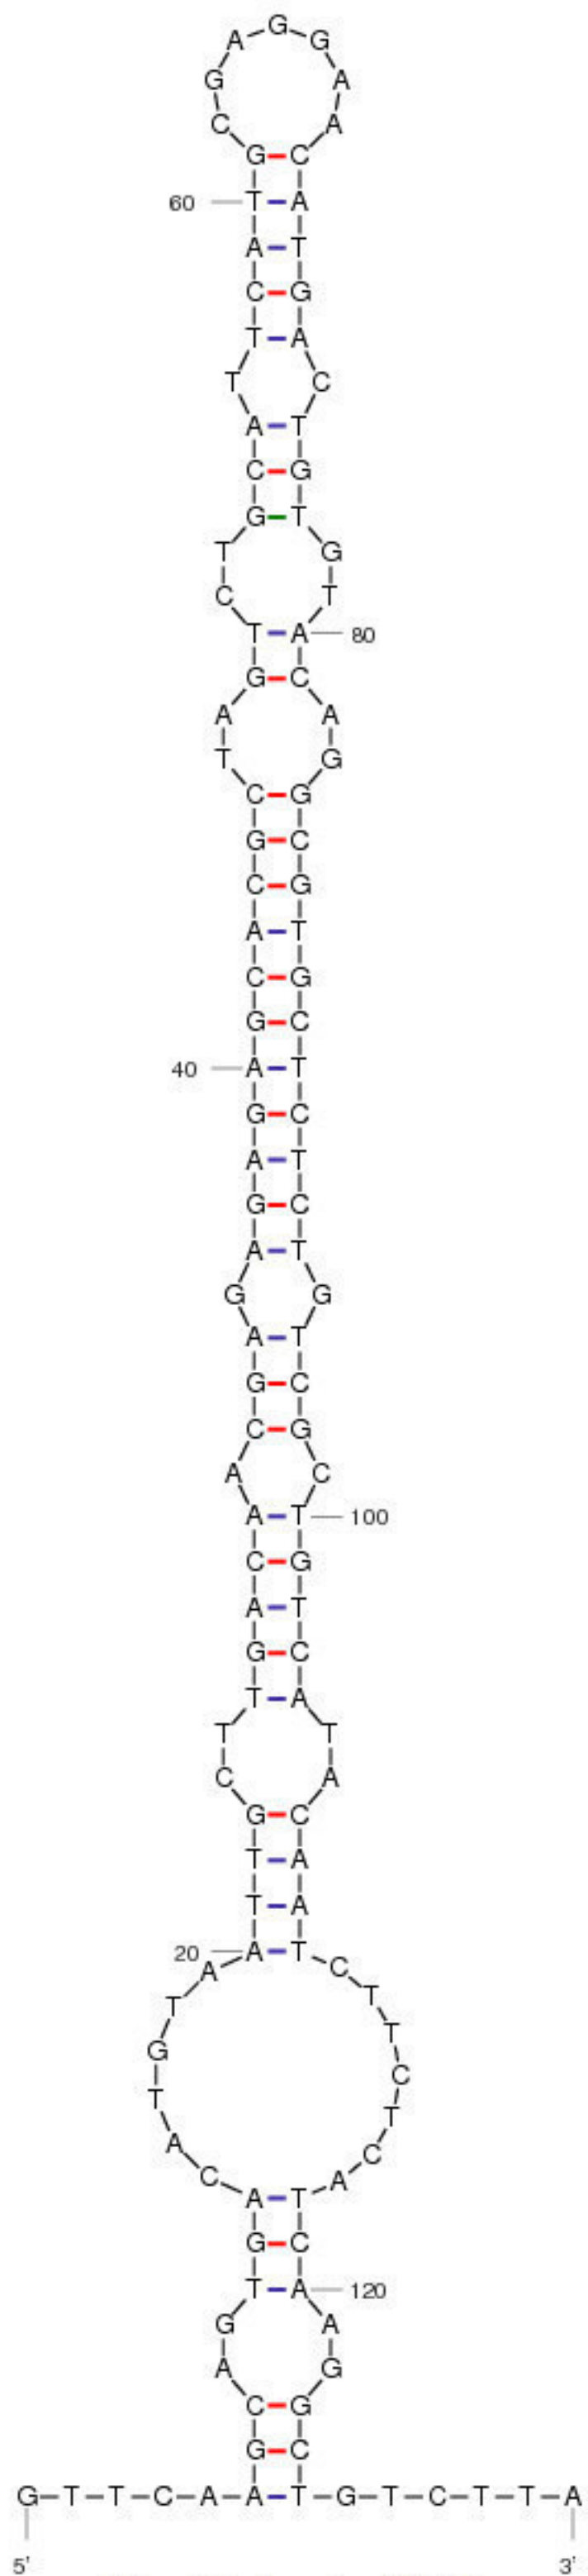

*dG = -53.4 vvi-miR535c*

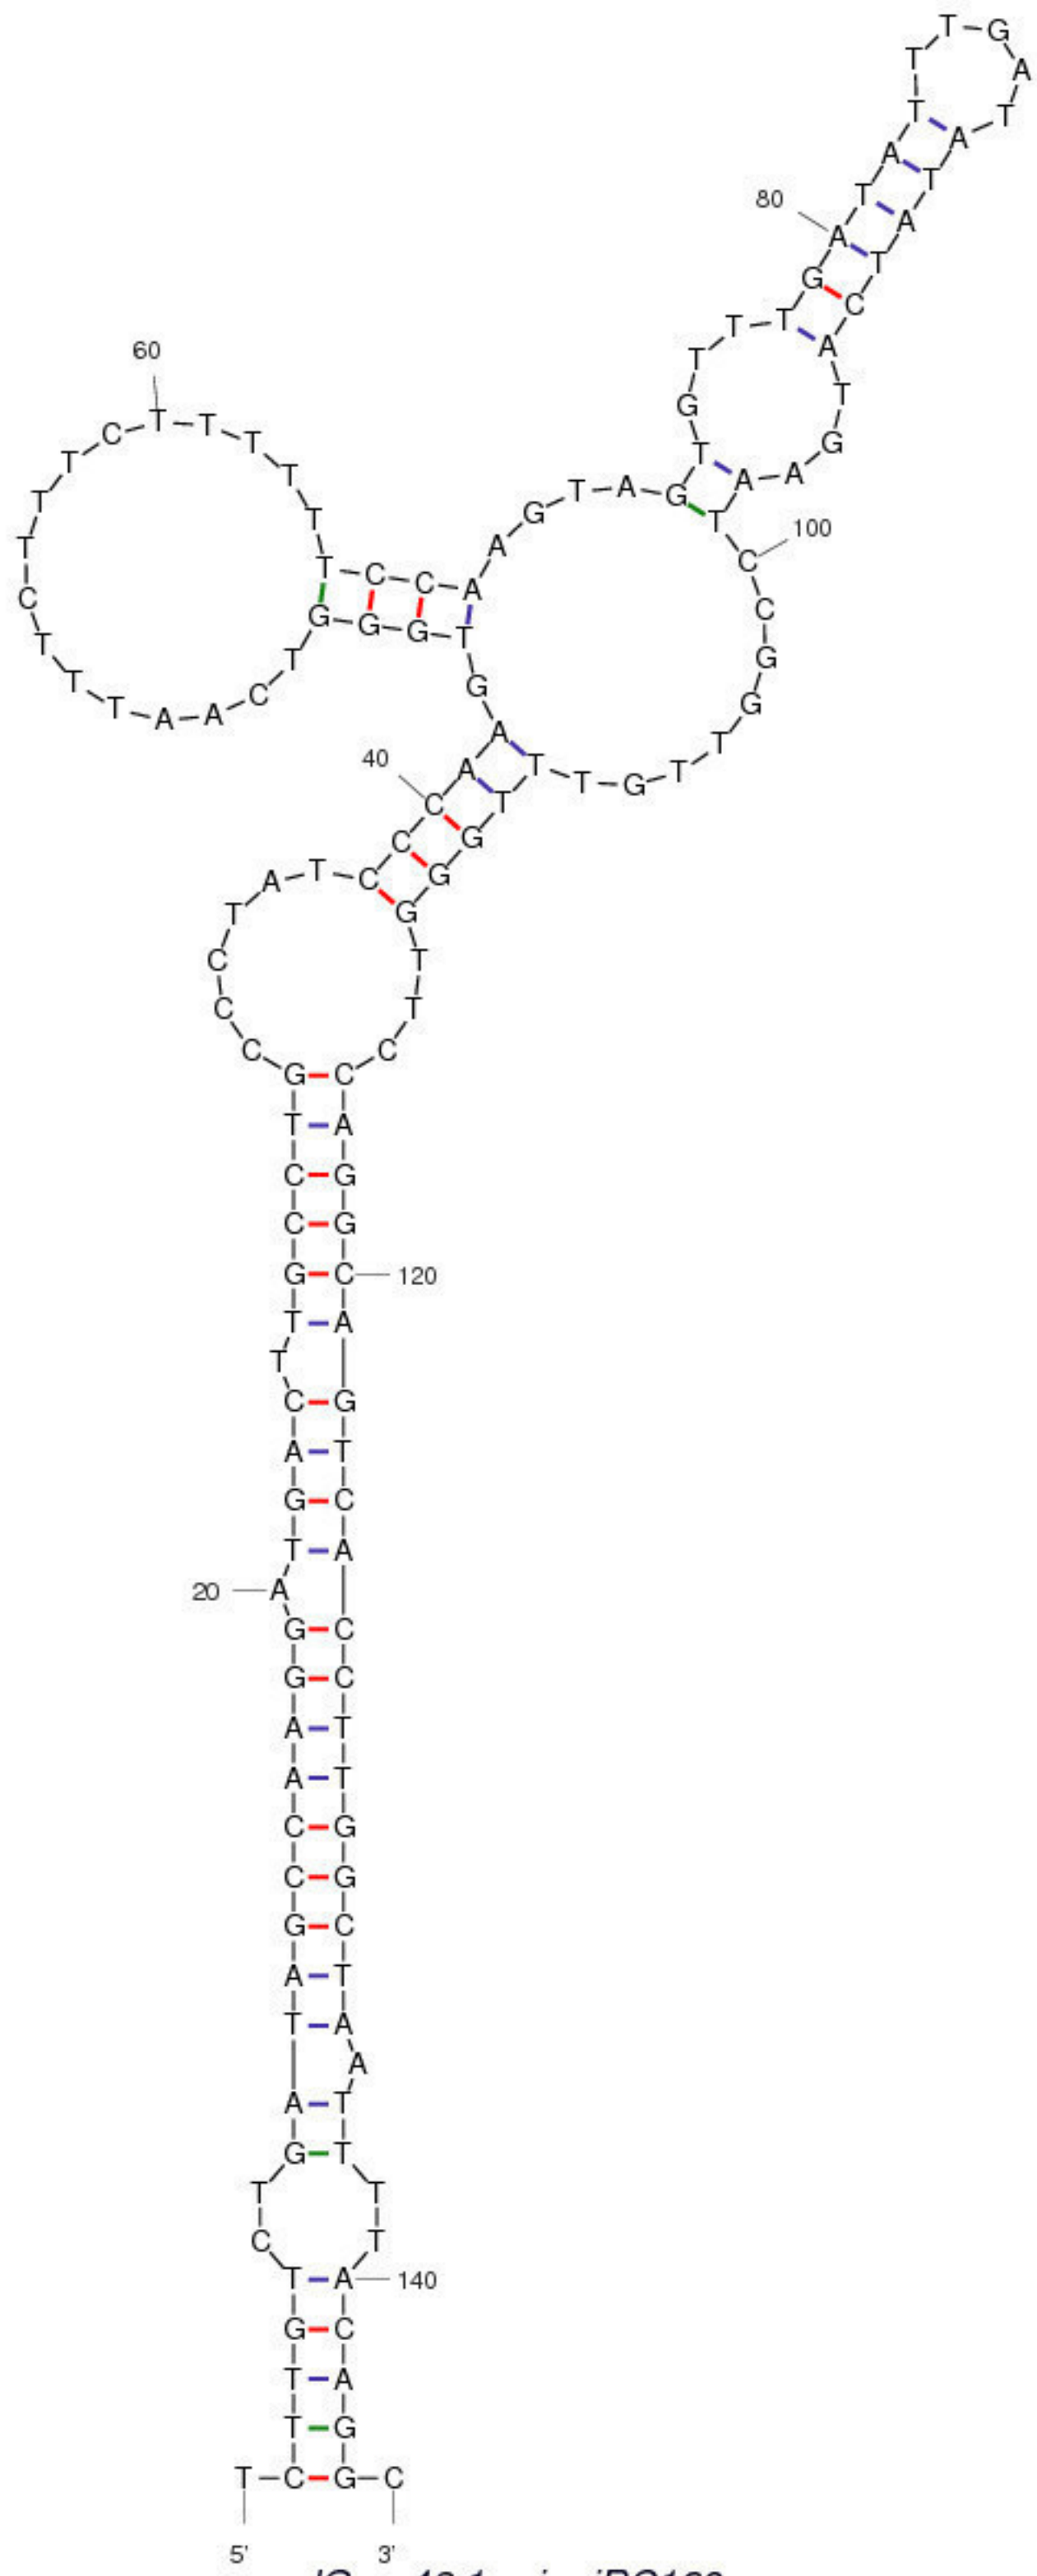

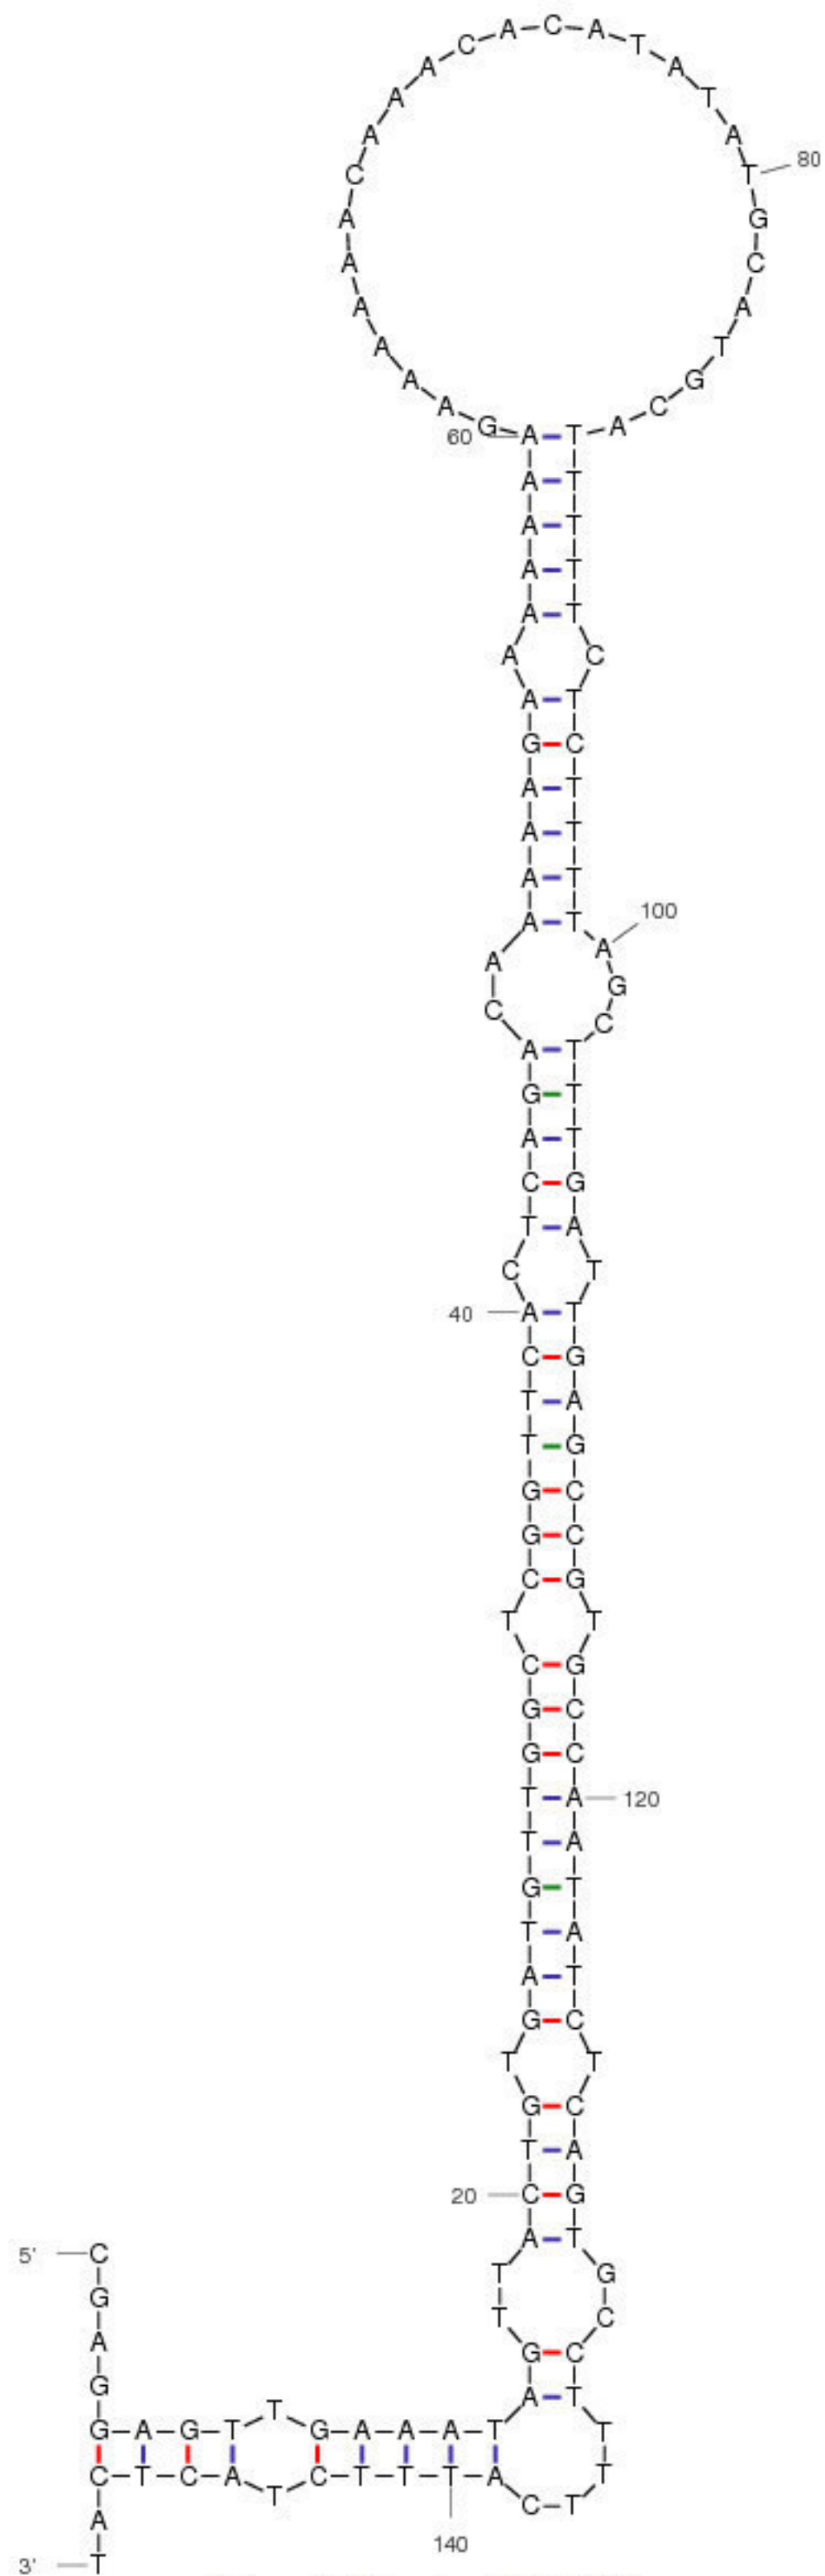

*dG = -49.3 vvi-miRC171j*



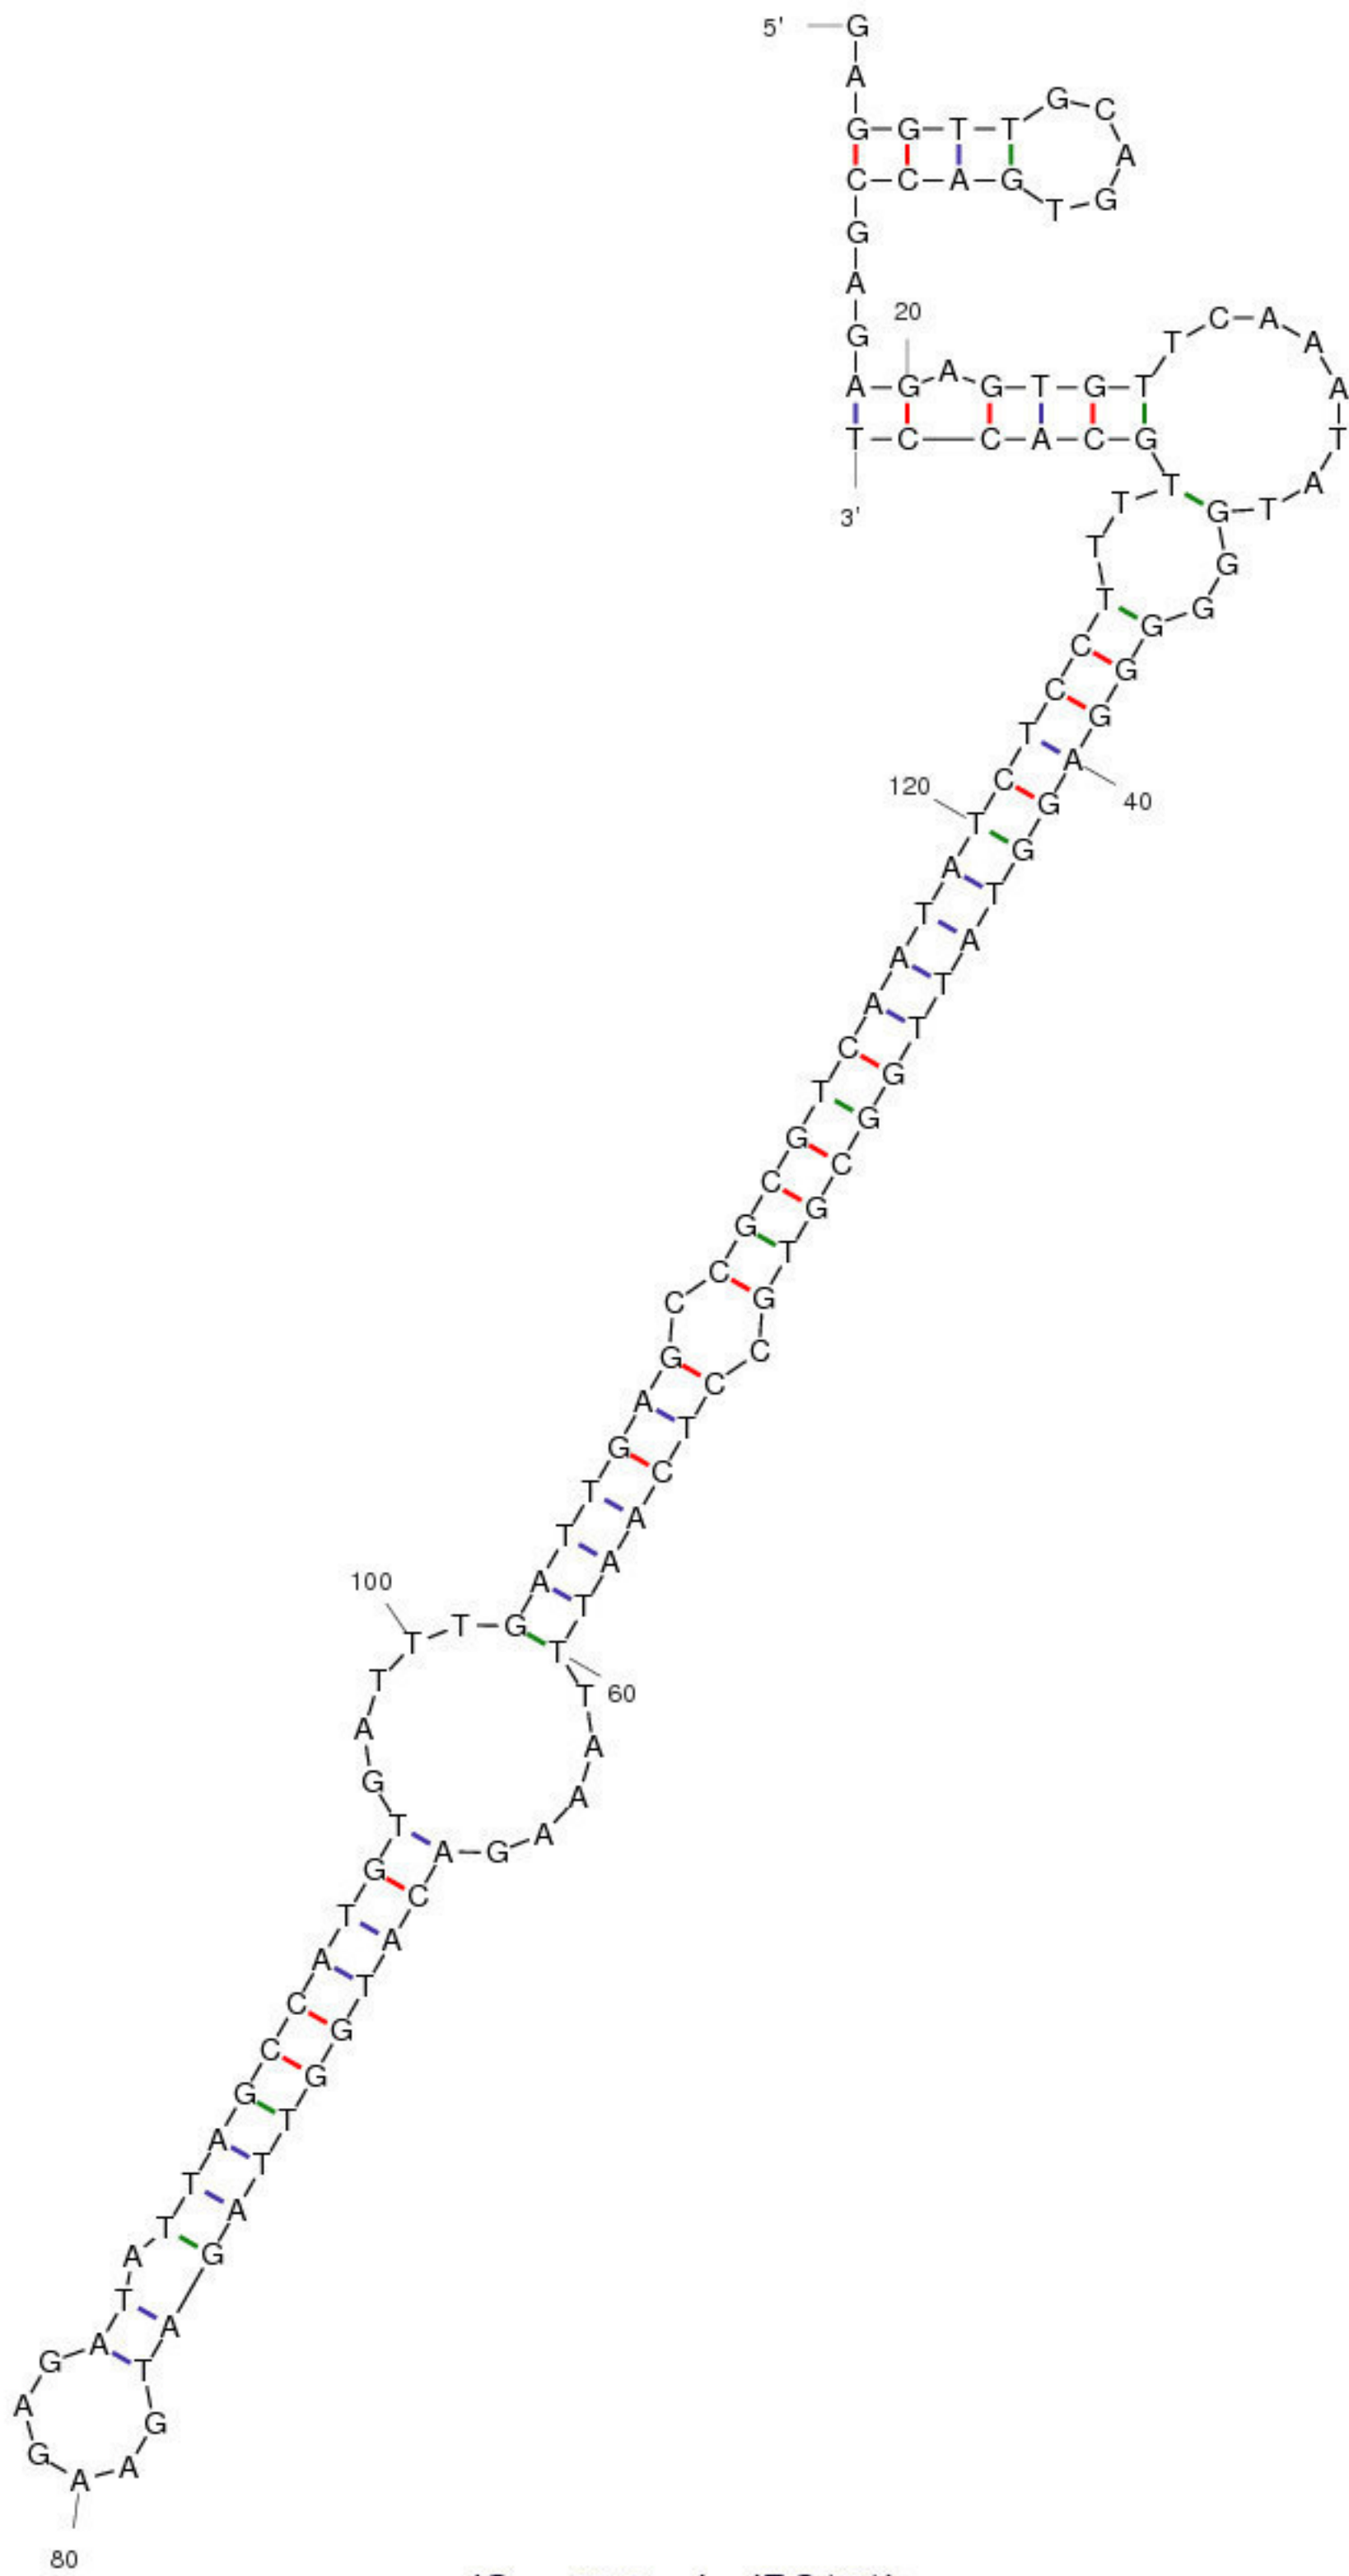

dG = -52.2 vvi-miRC171k

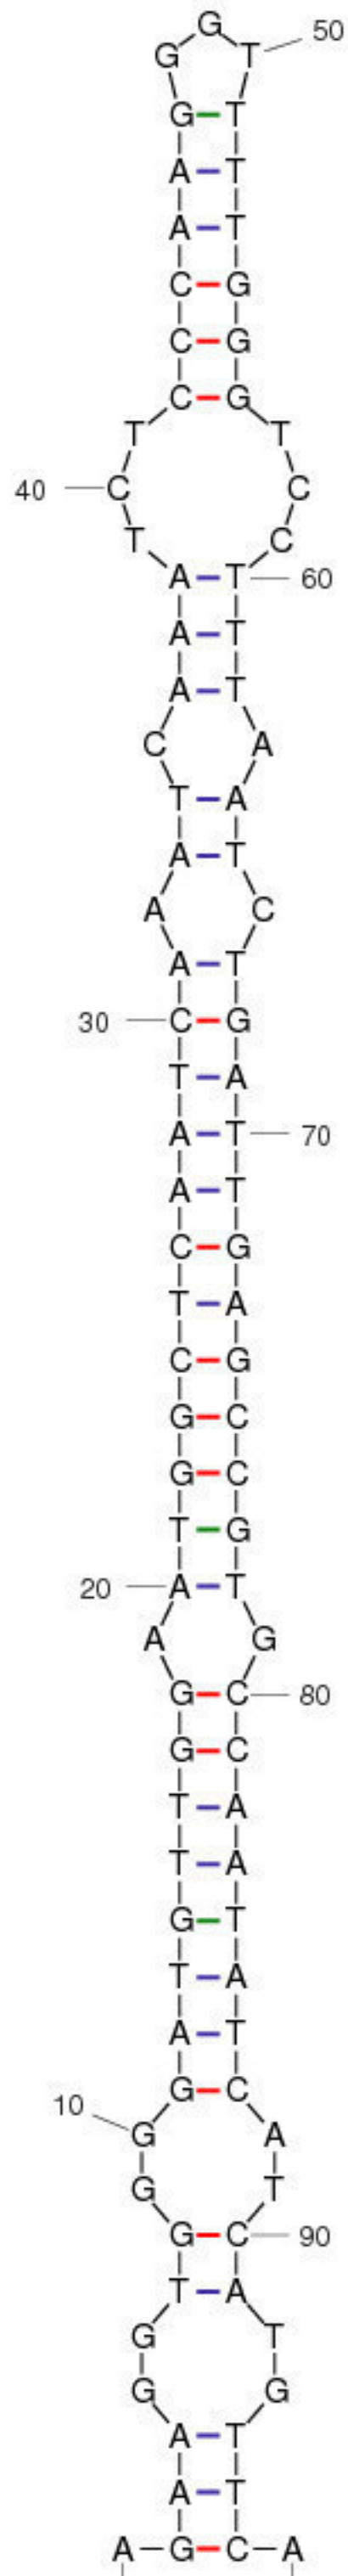

*dG* = -42.2 vvi-miRC171I

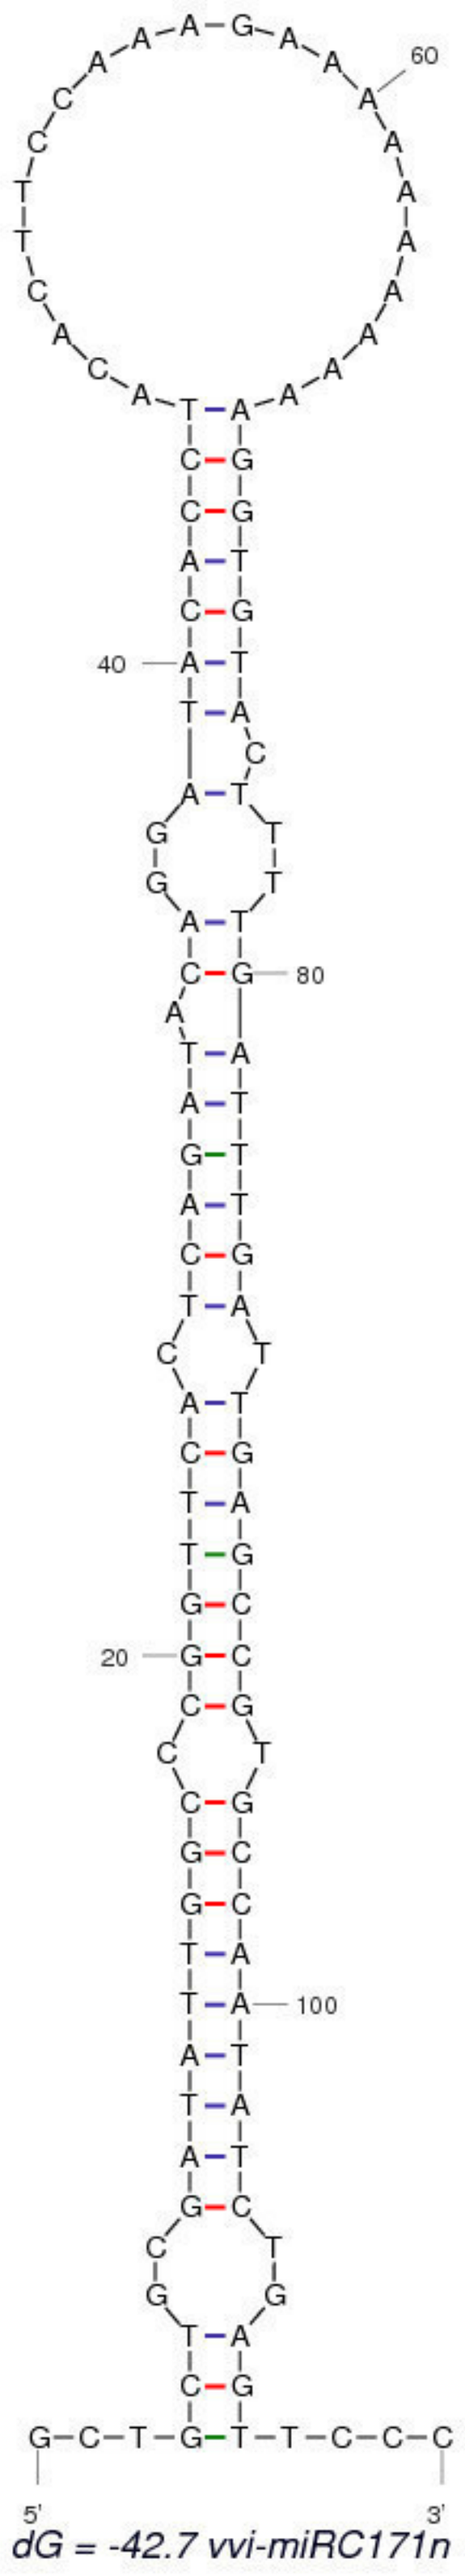

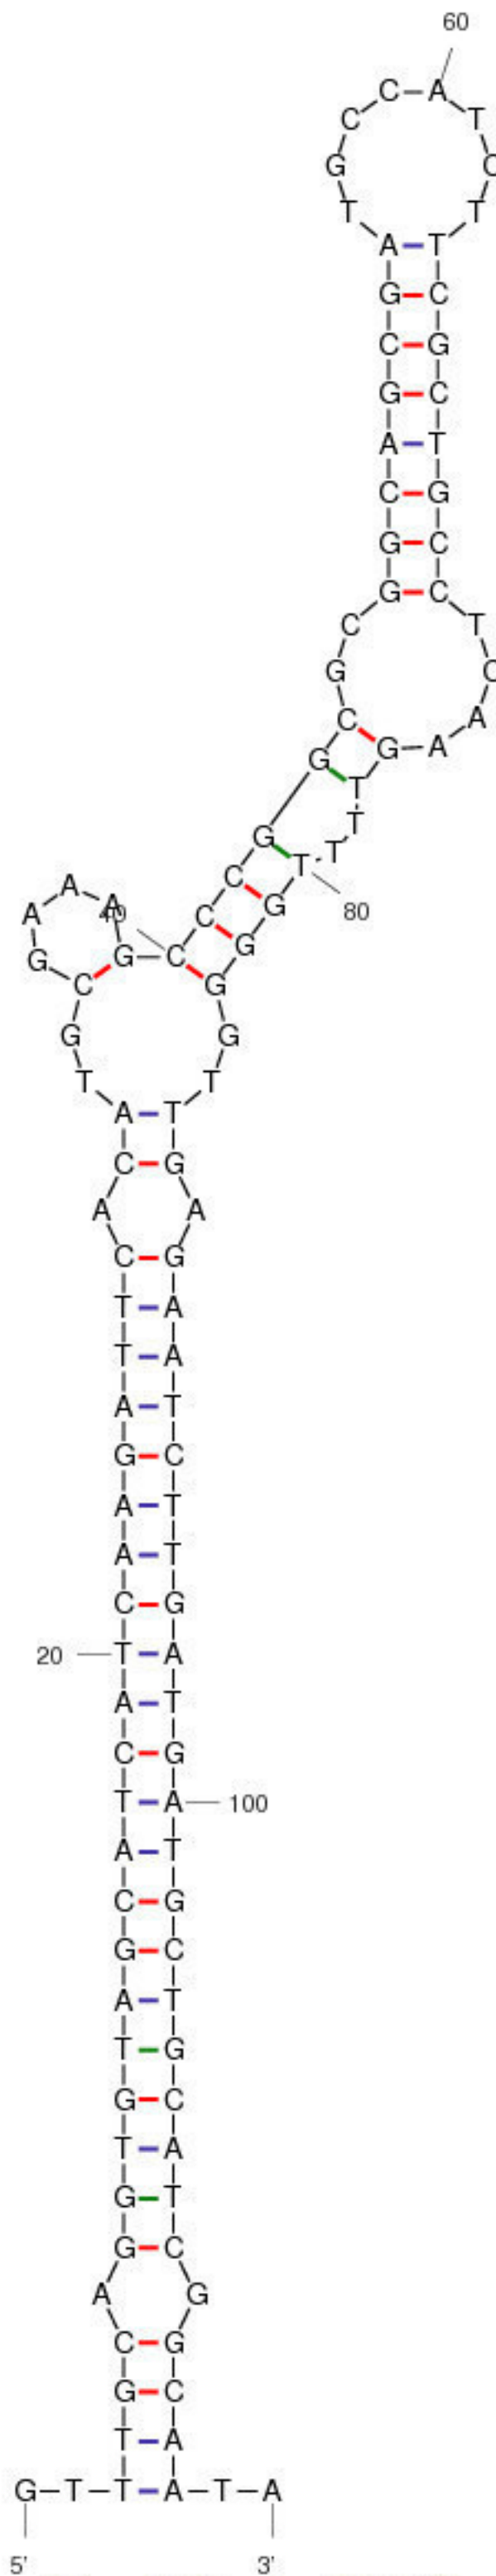

*dG = -61.3 vvi-miRC172e*

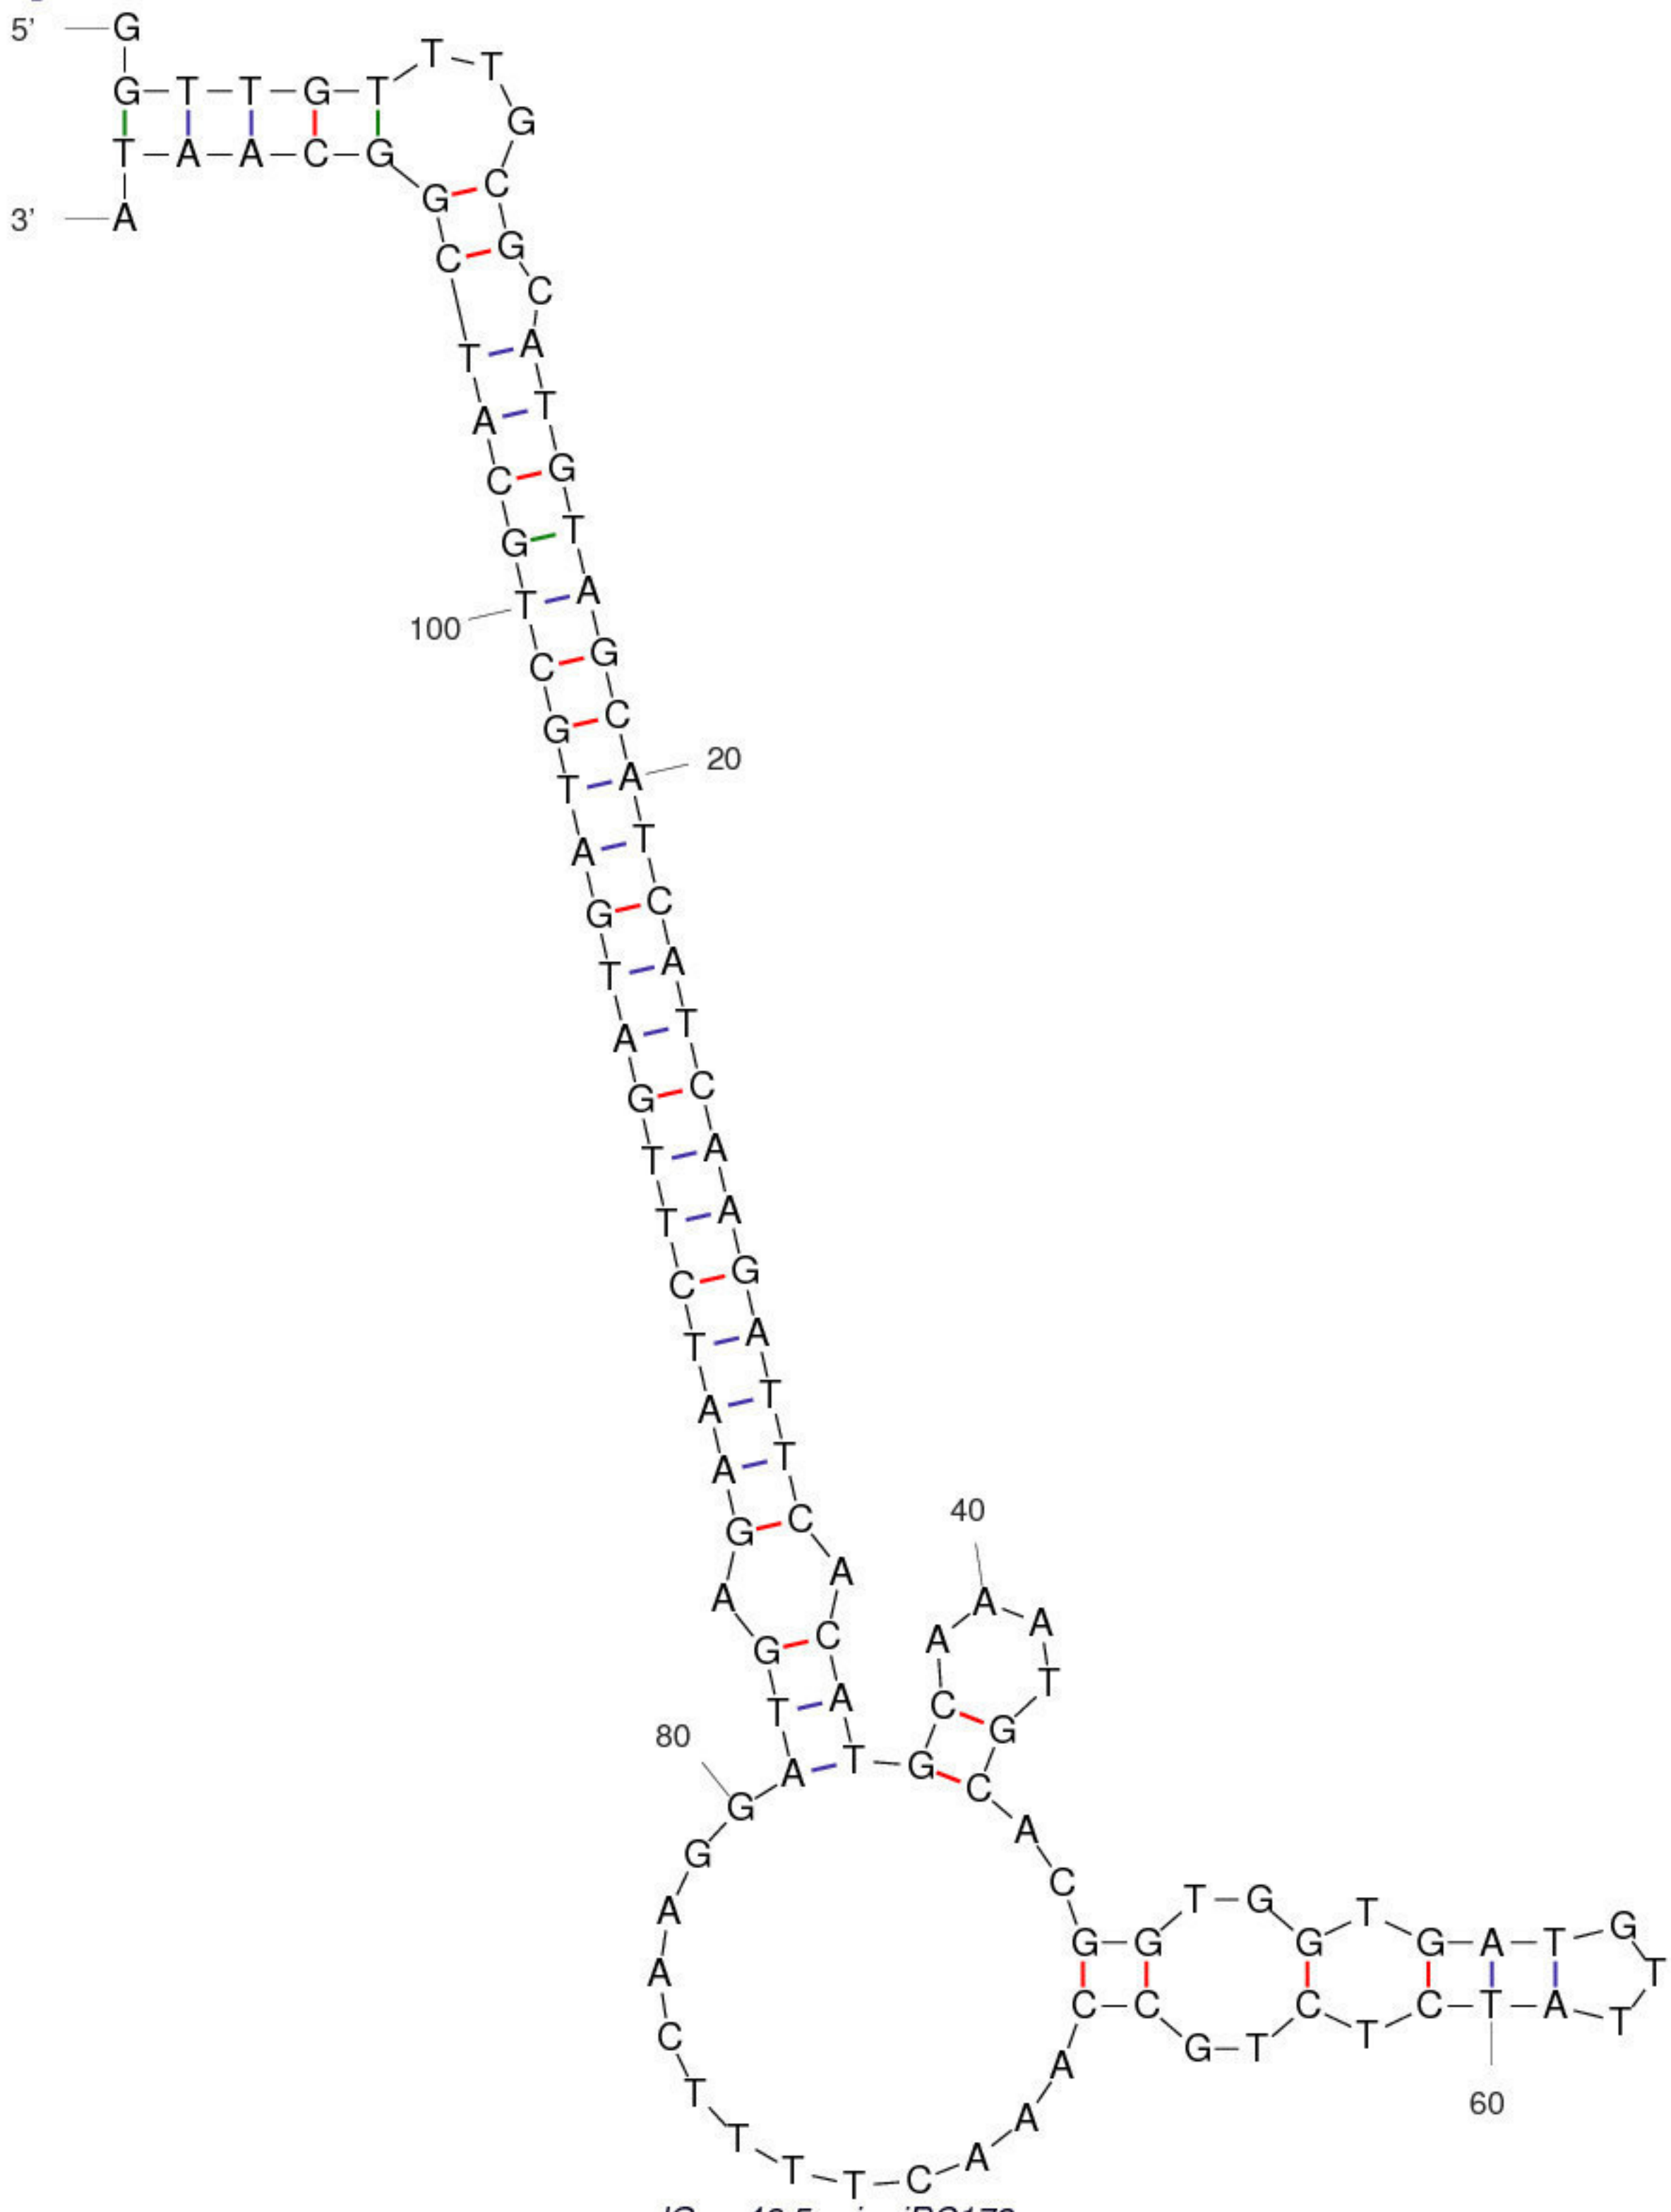

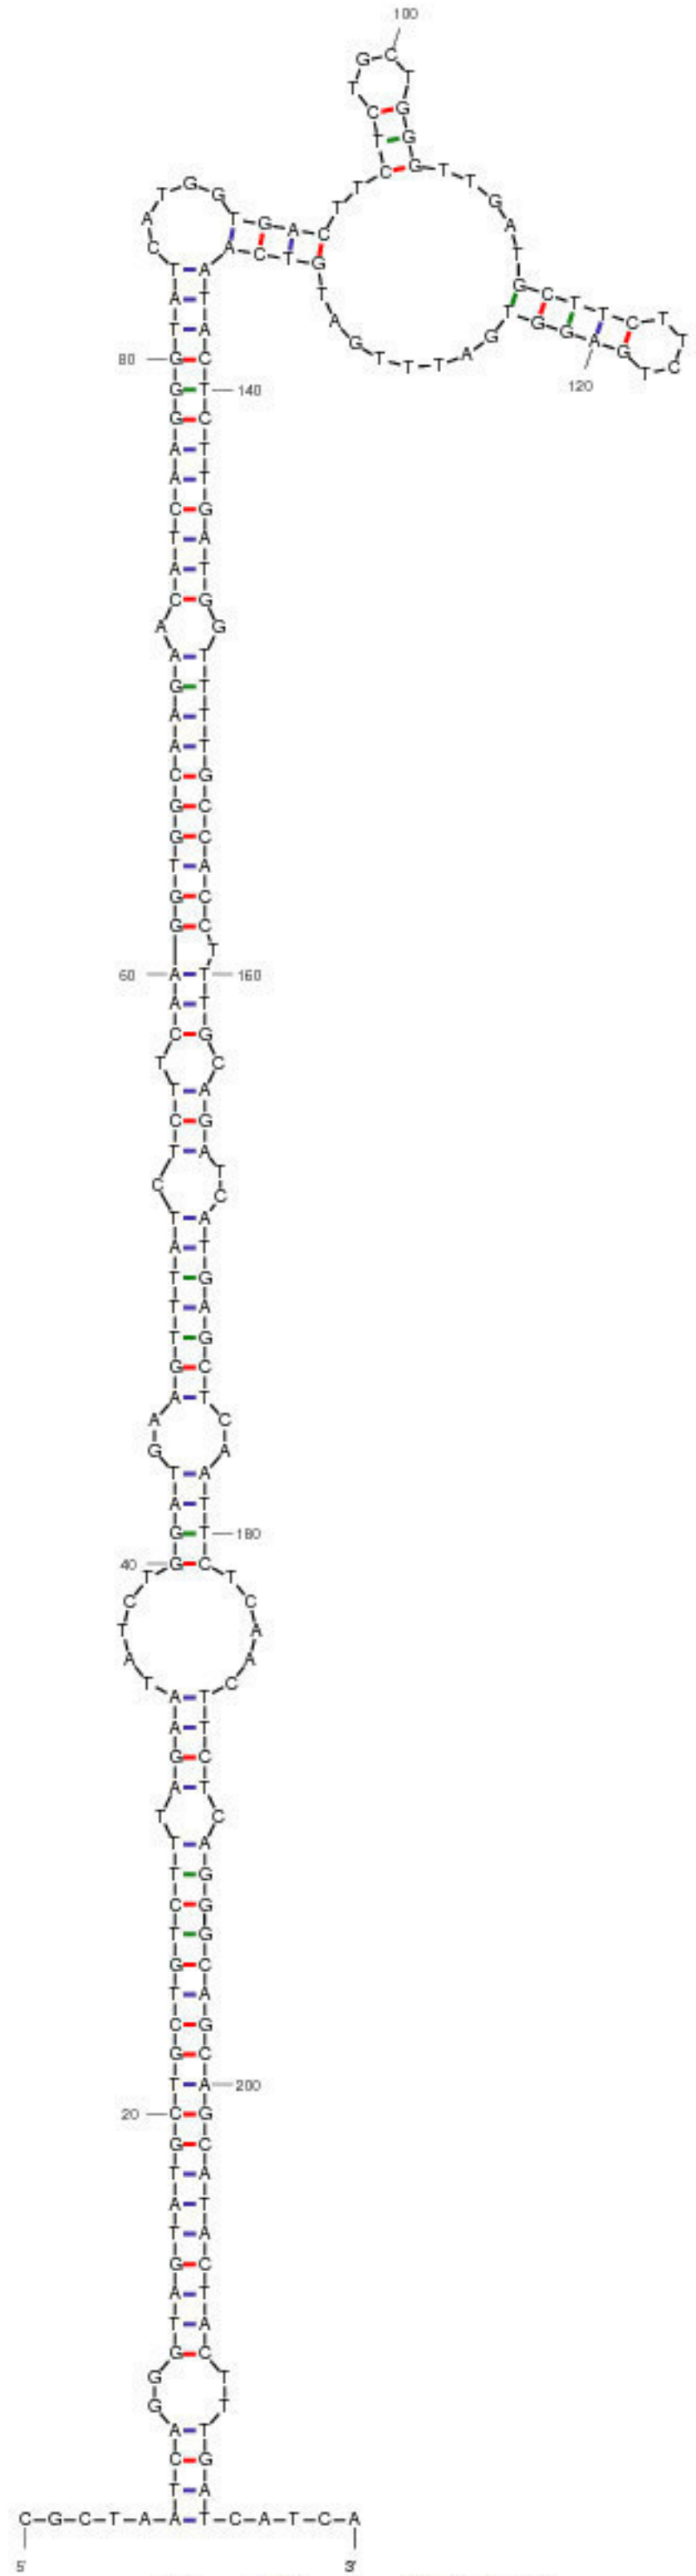

dG = -96 vvi-miRC3624a

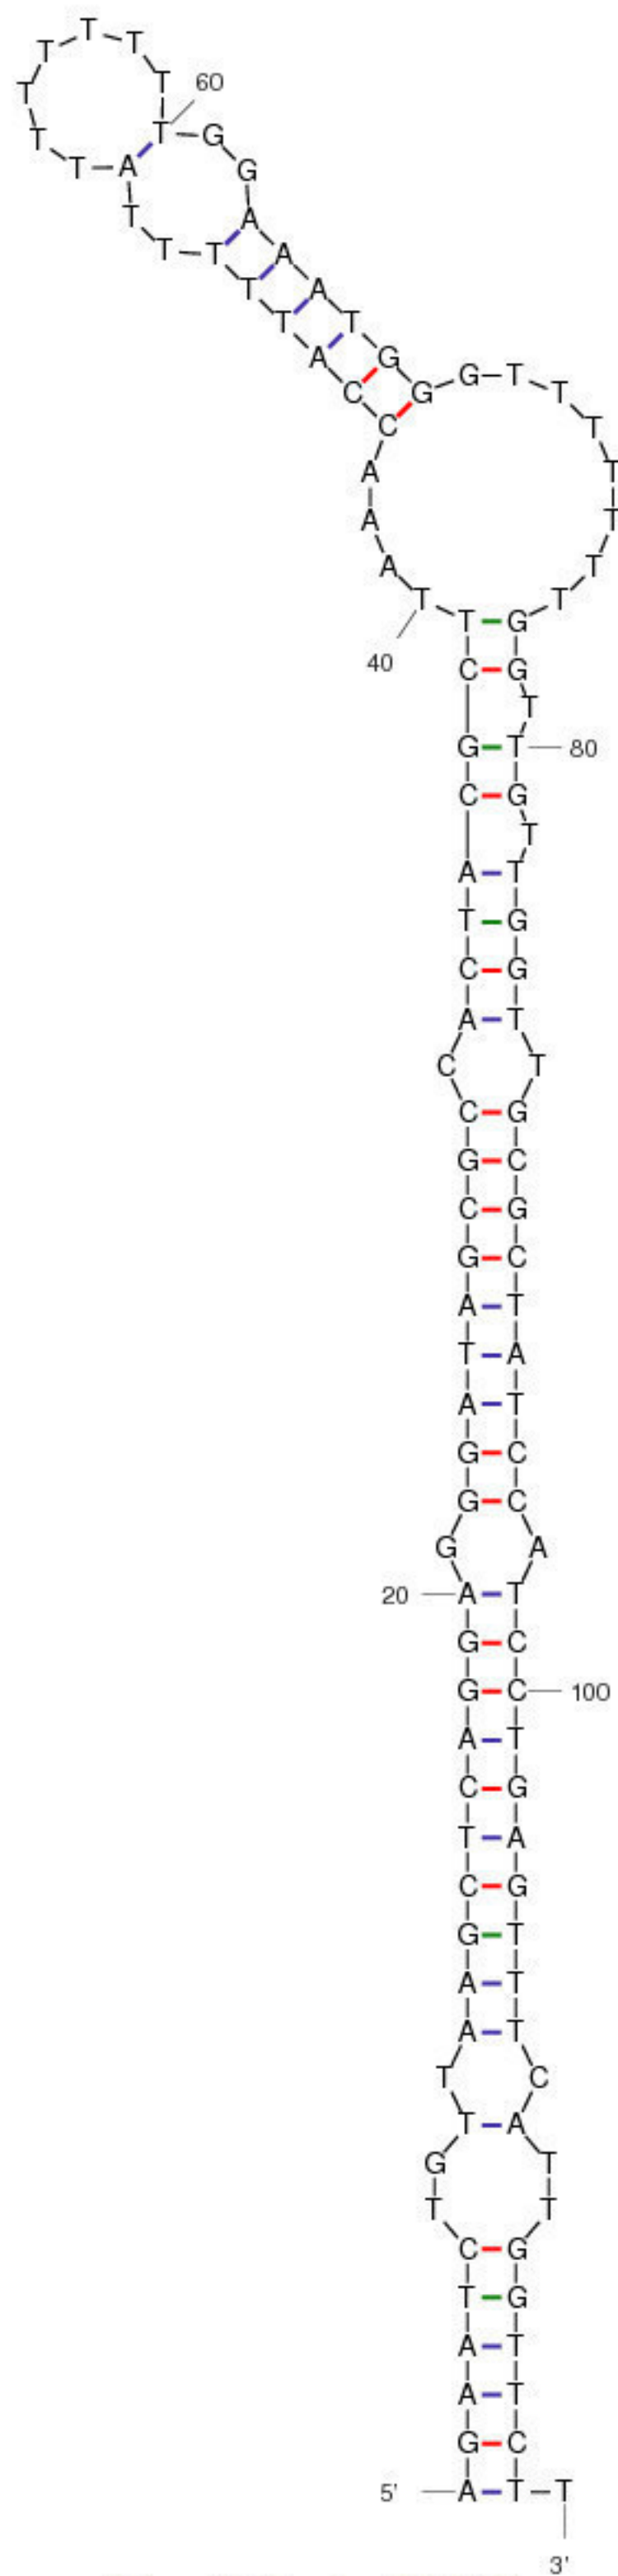

$dG = -48.6$  vvi-miRC390a

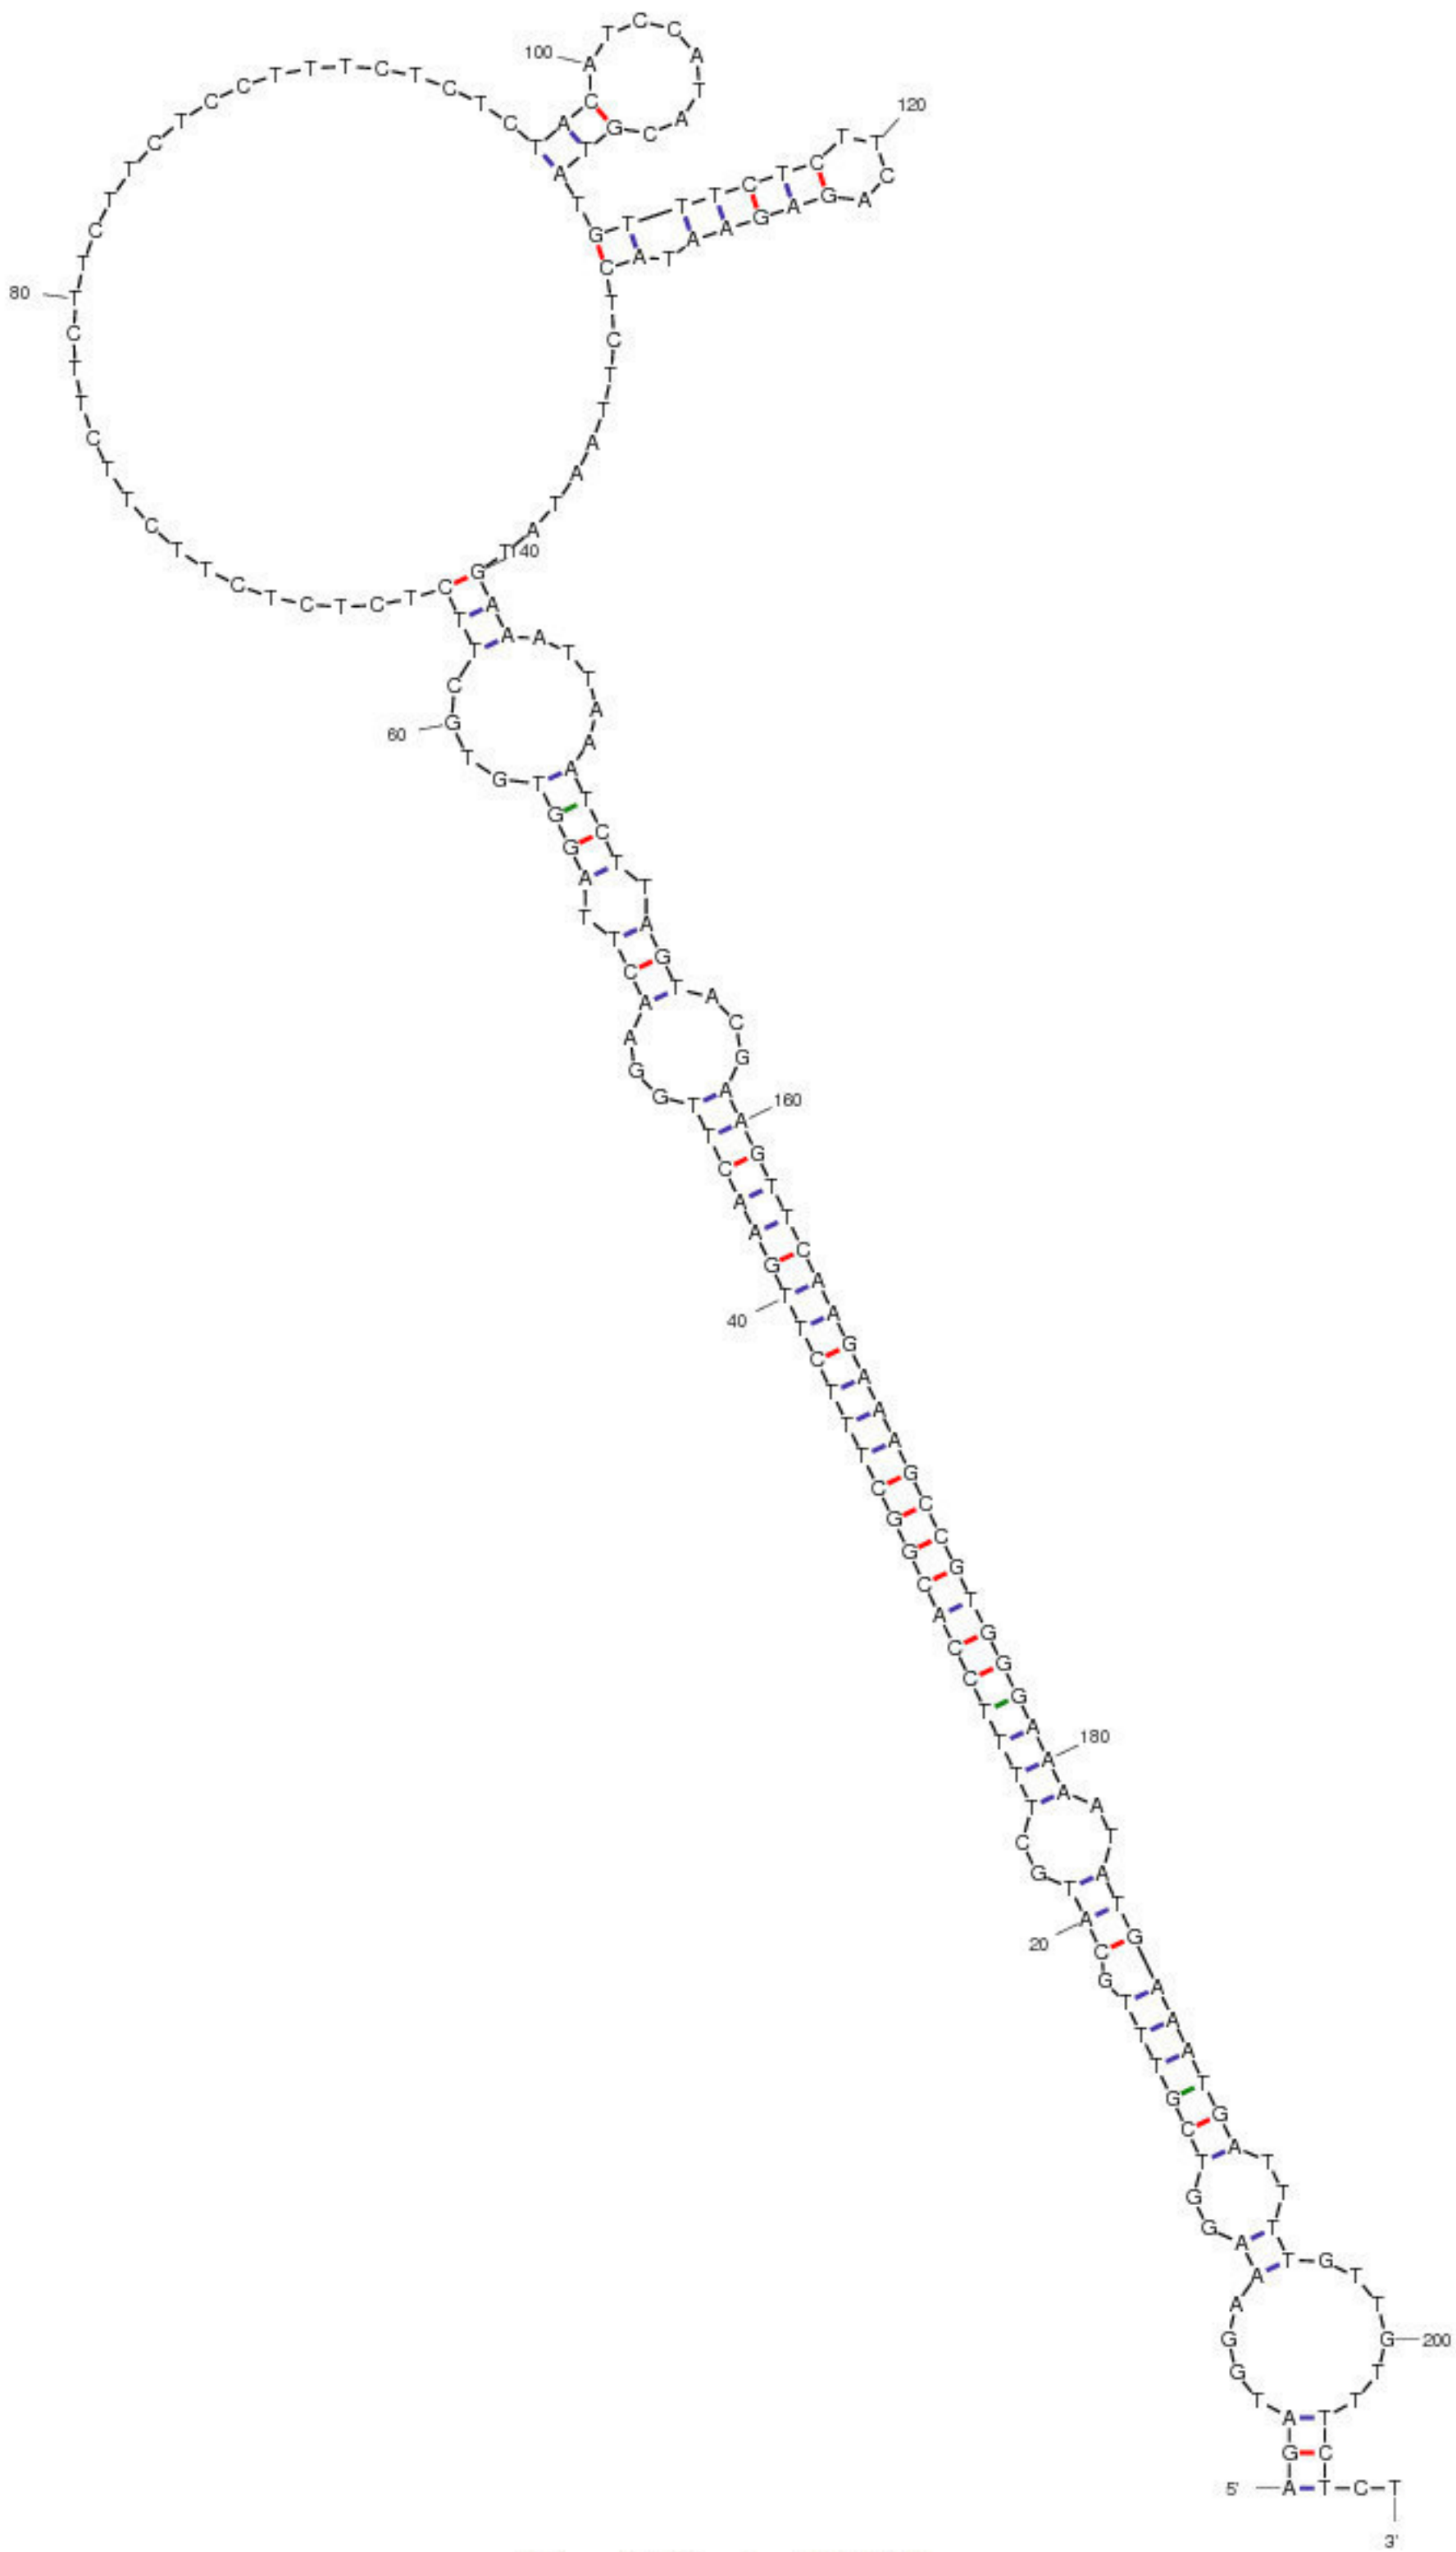

*dG = -56.8 vvi-miRC396e*



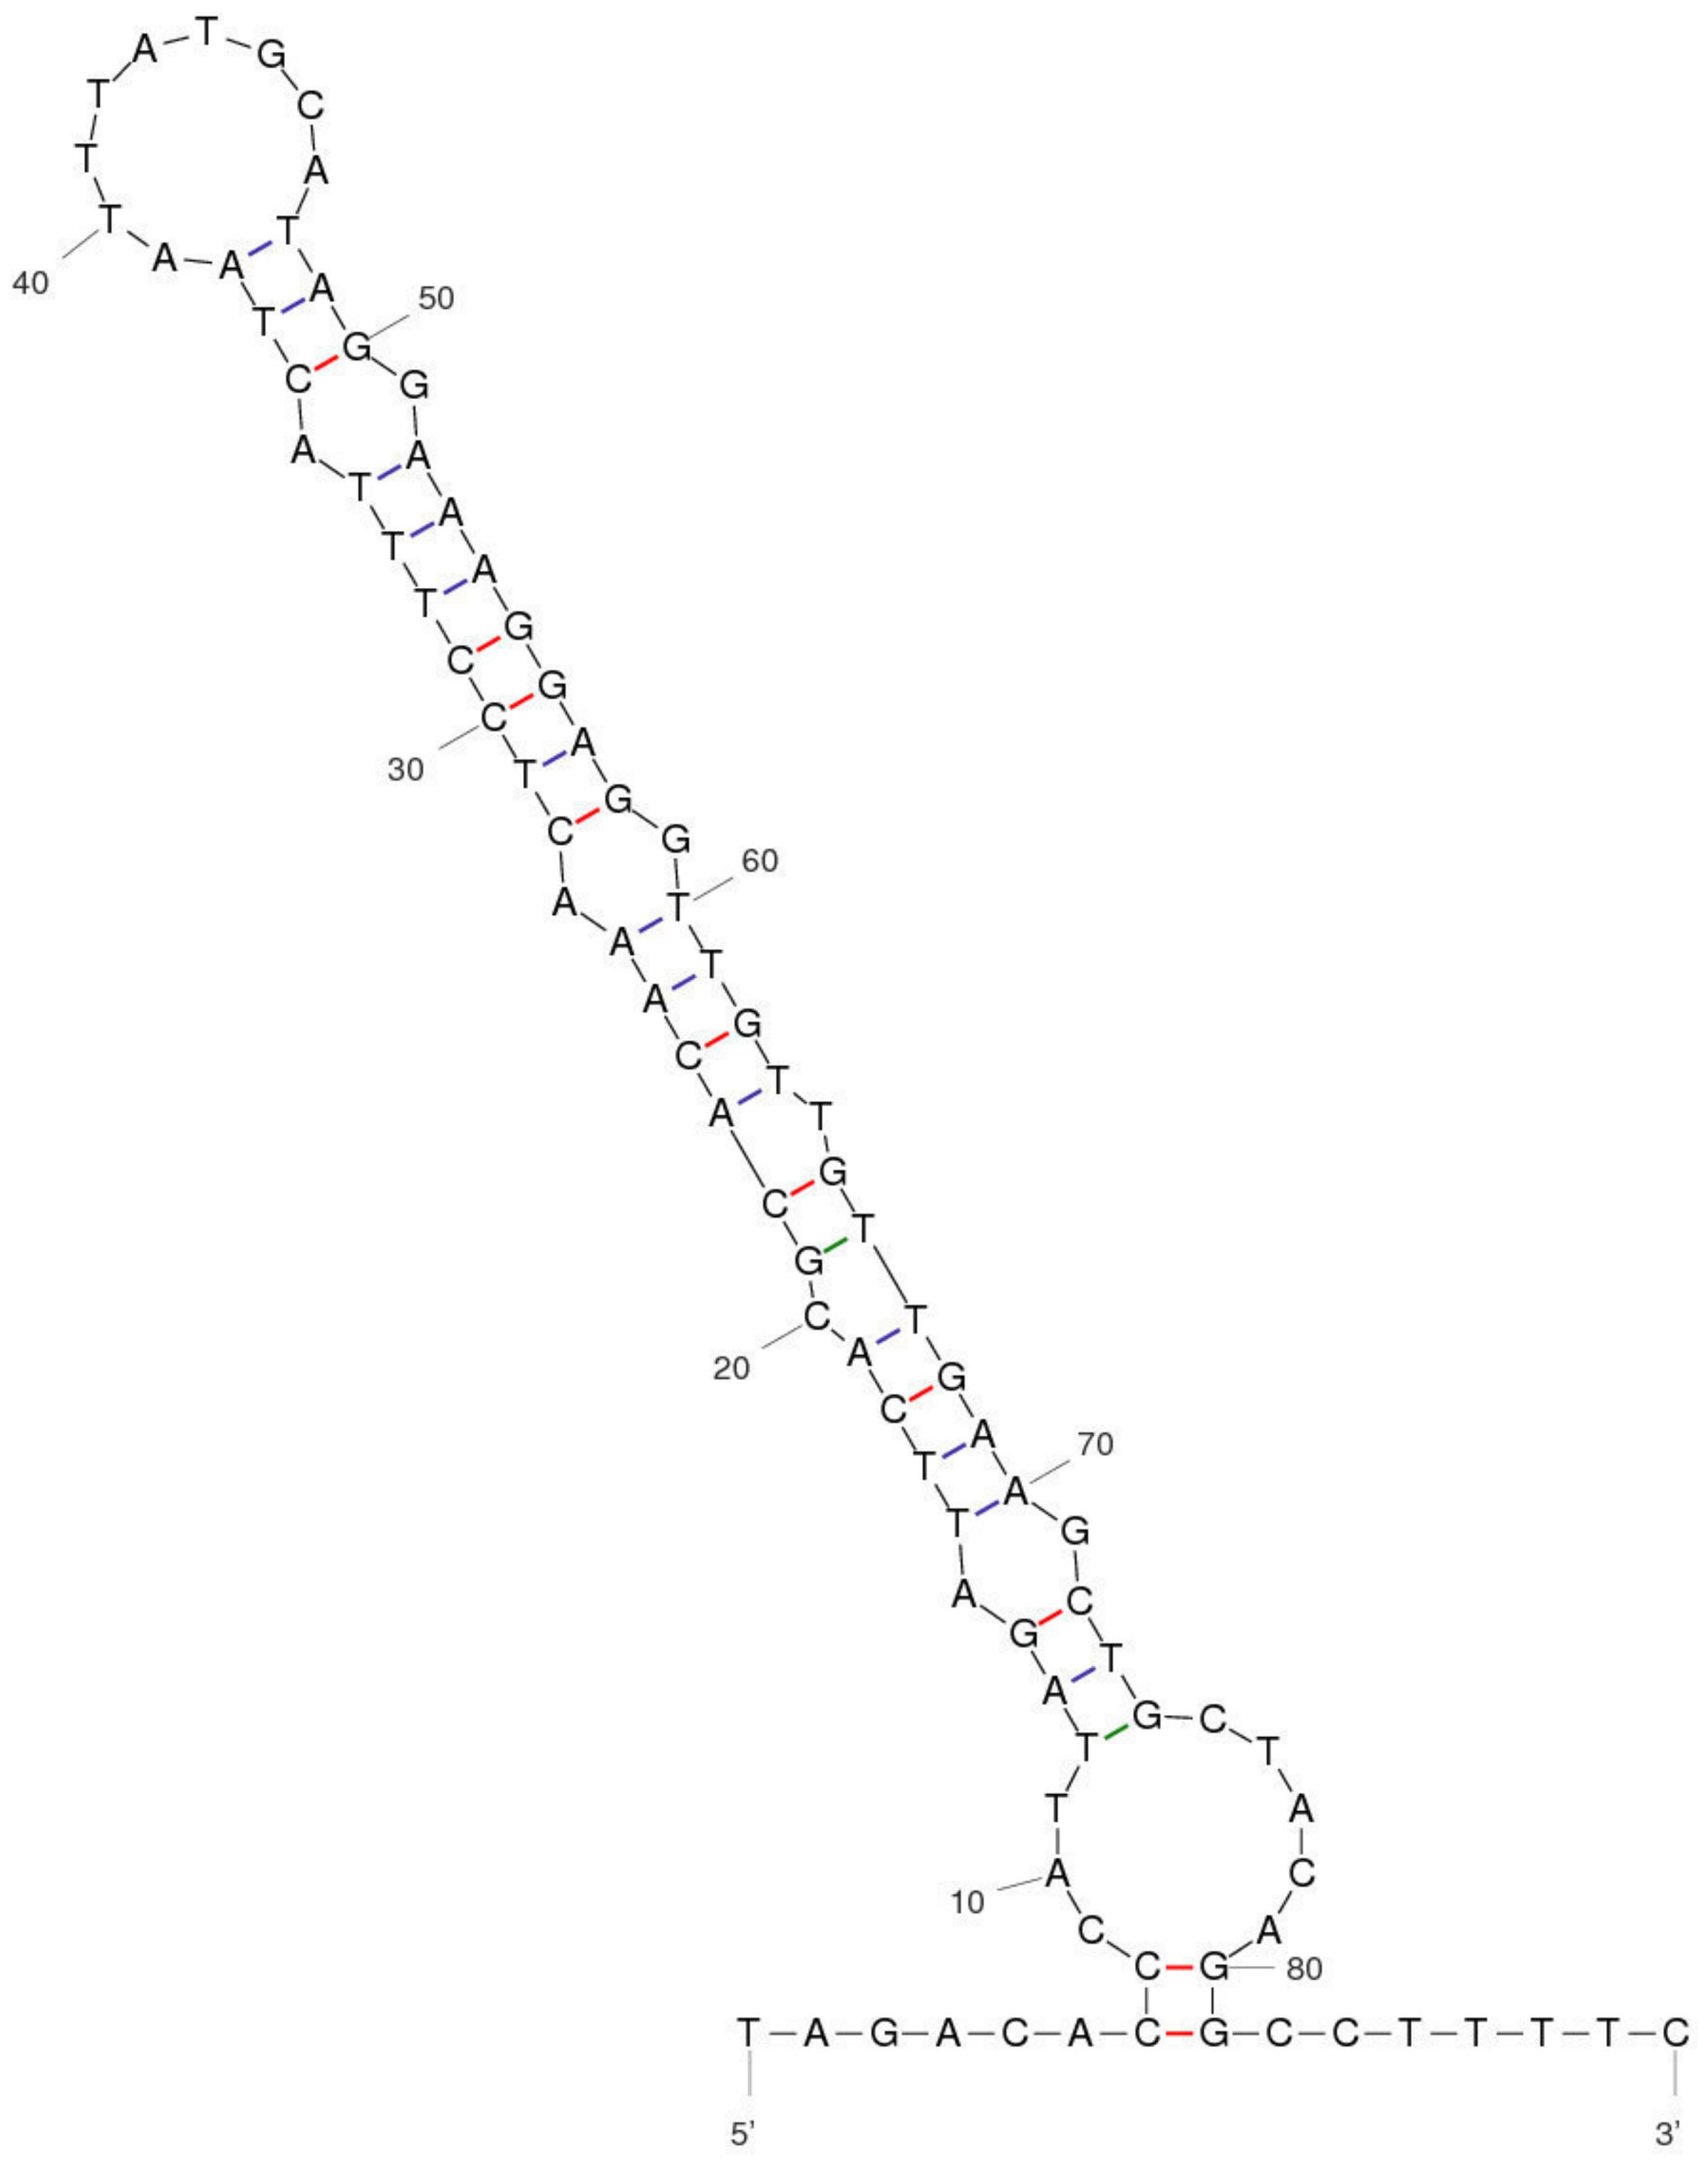

dG = -17.4 vvi-miRC403g

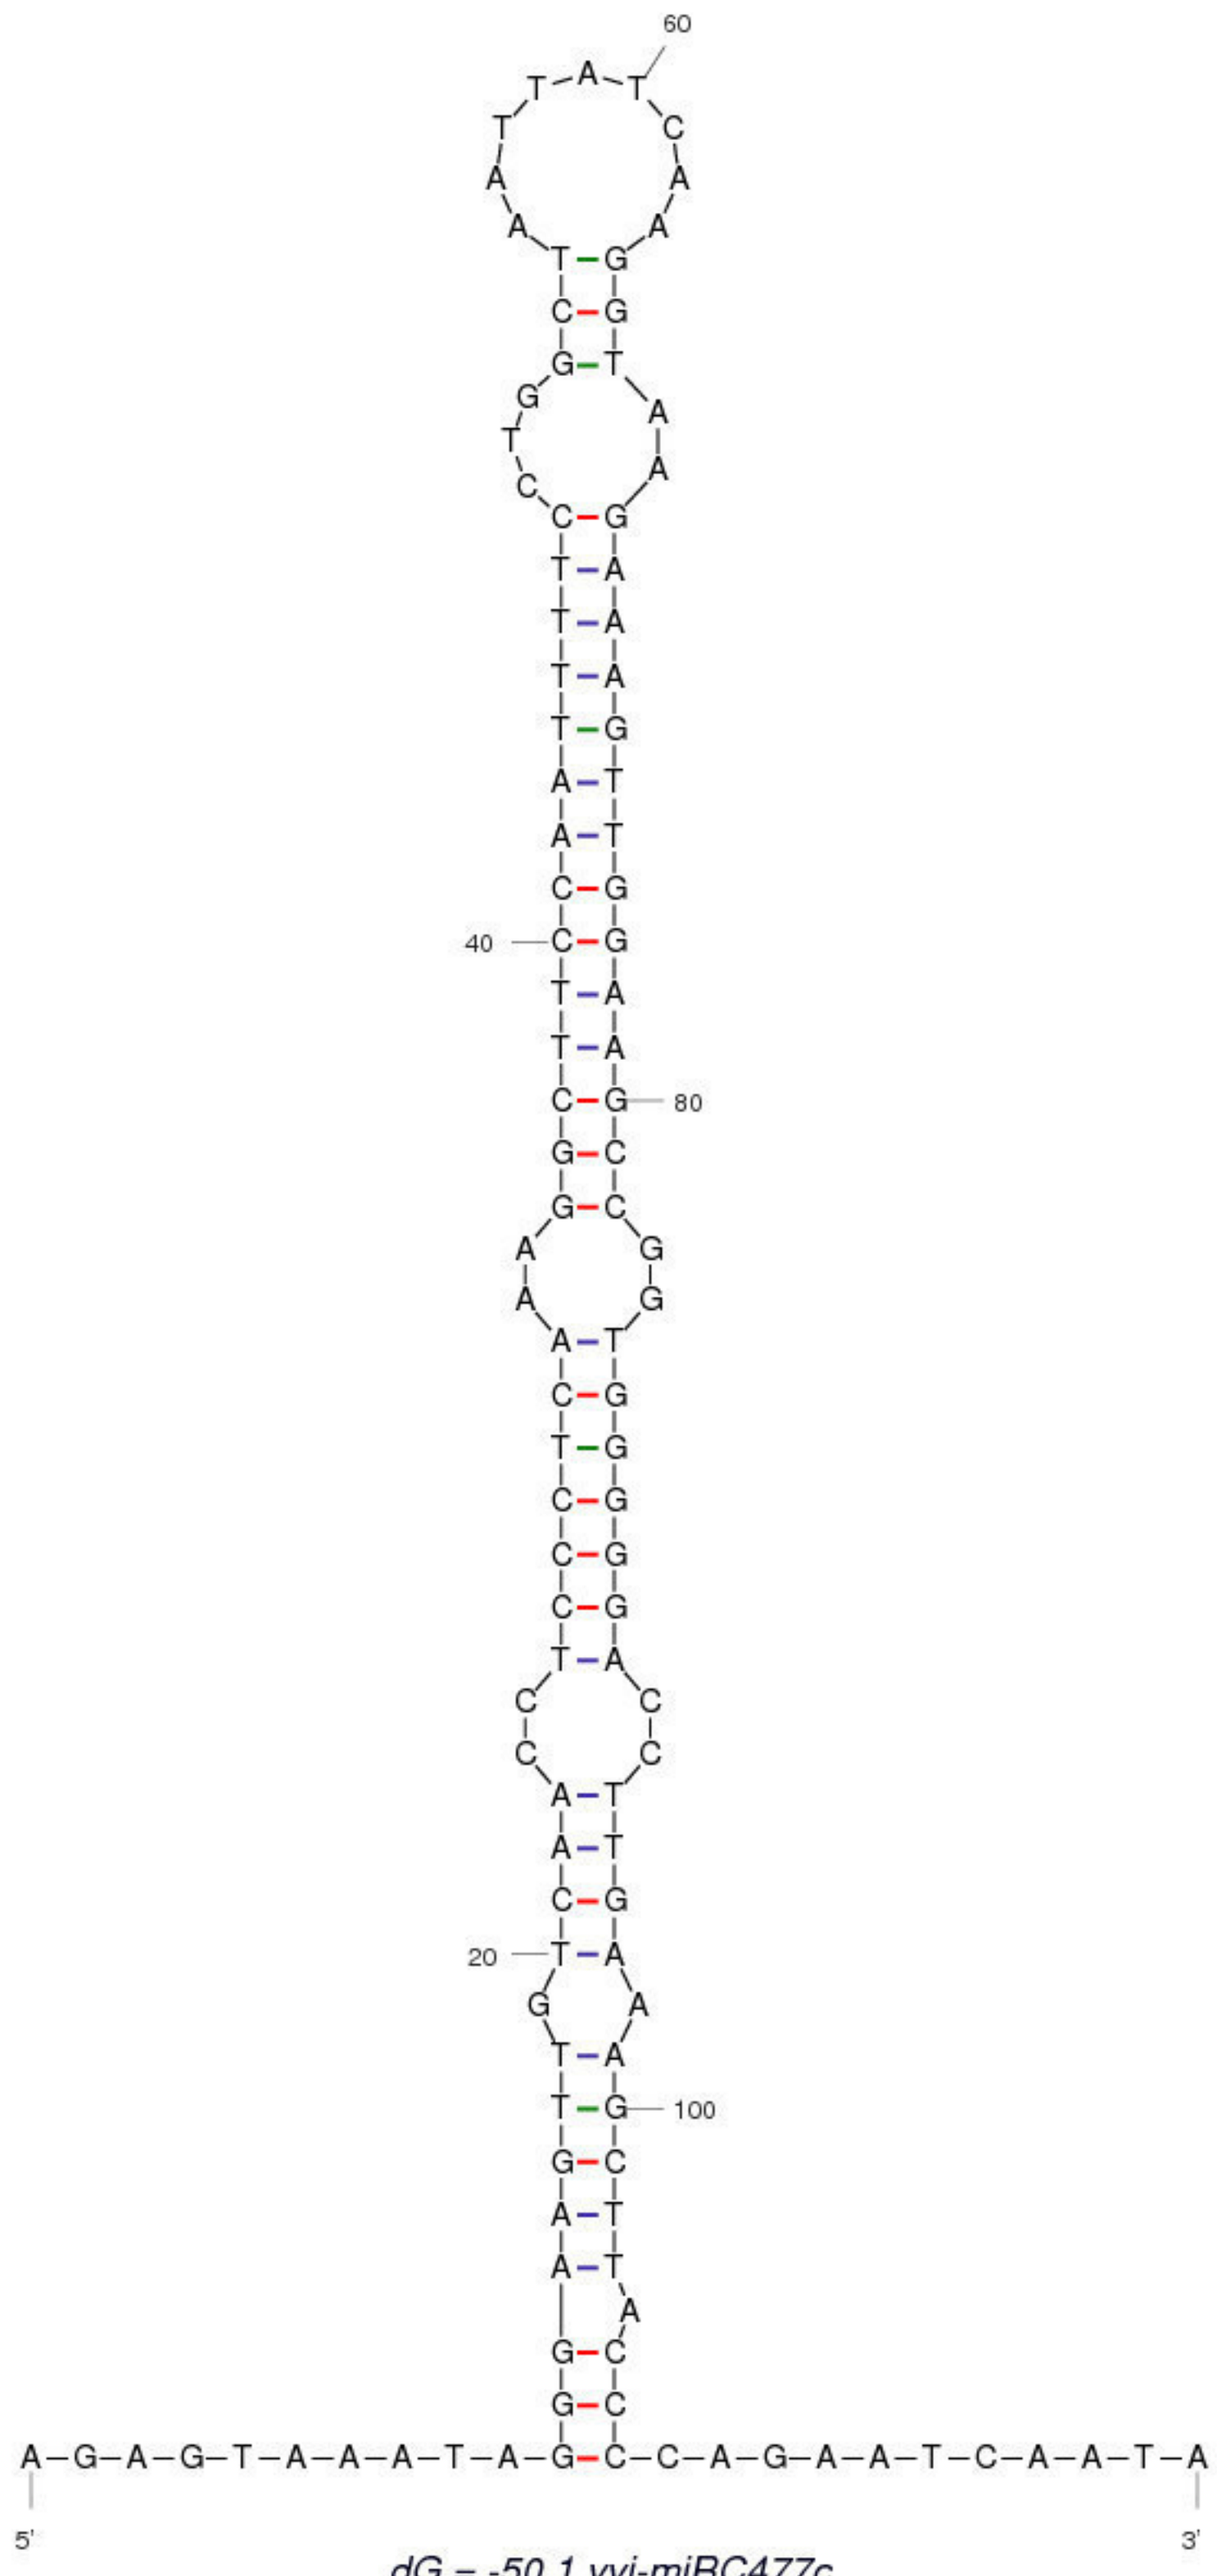

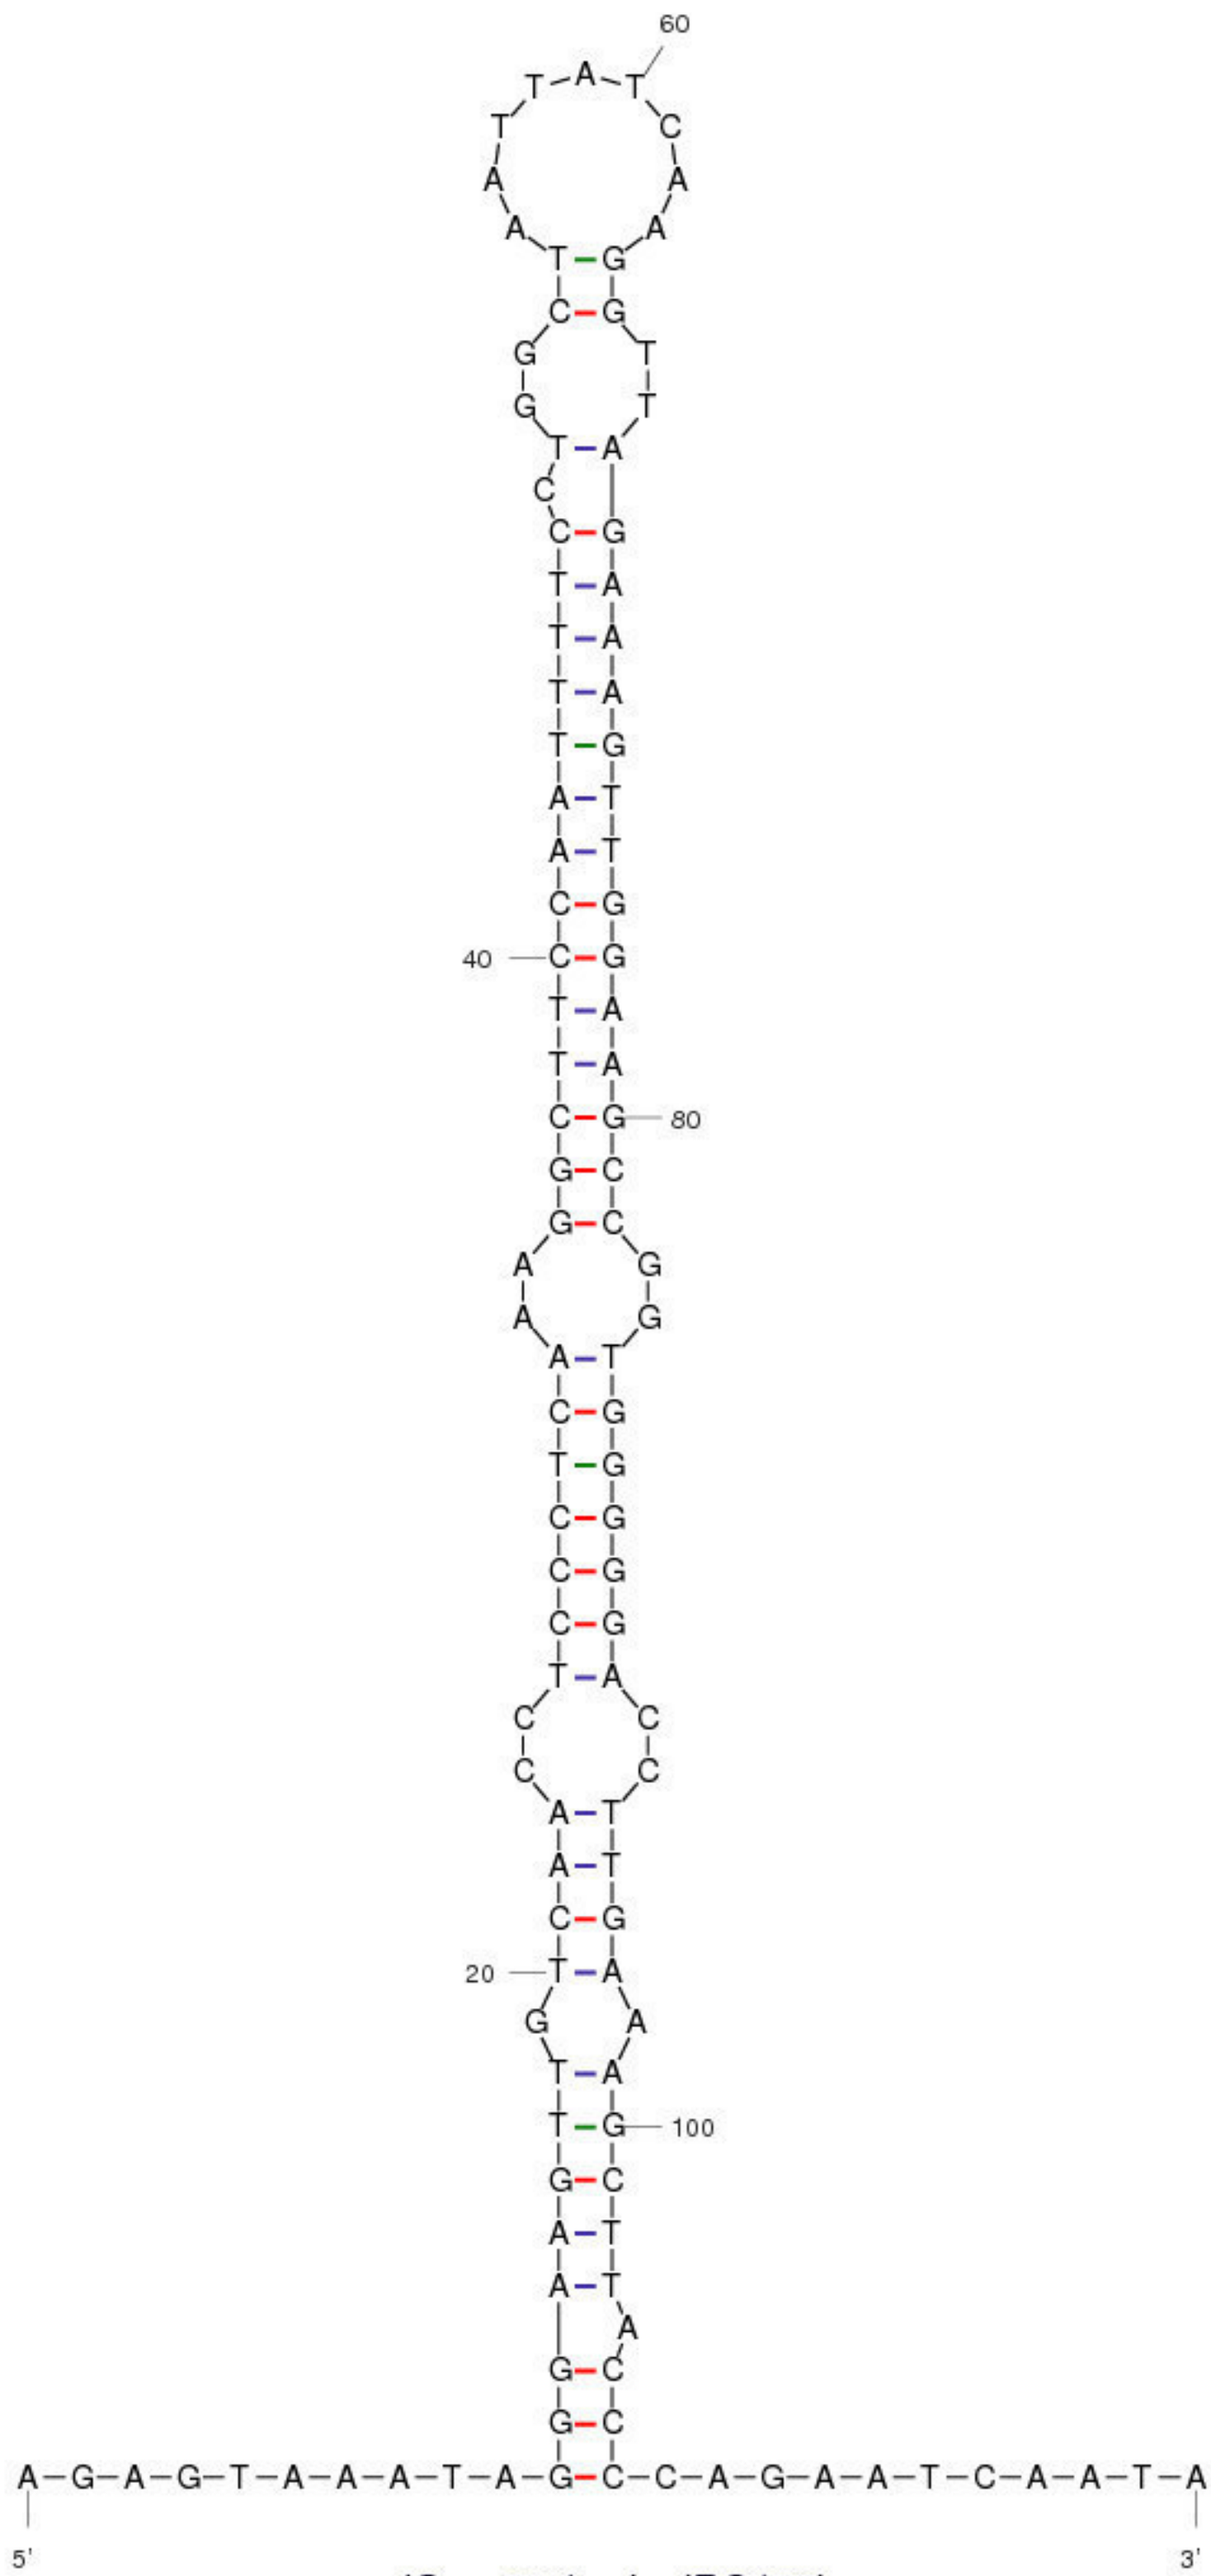

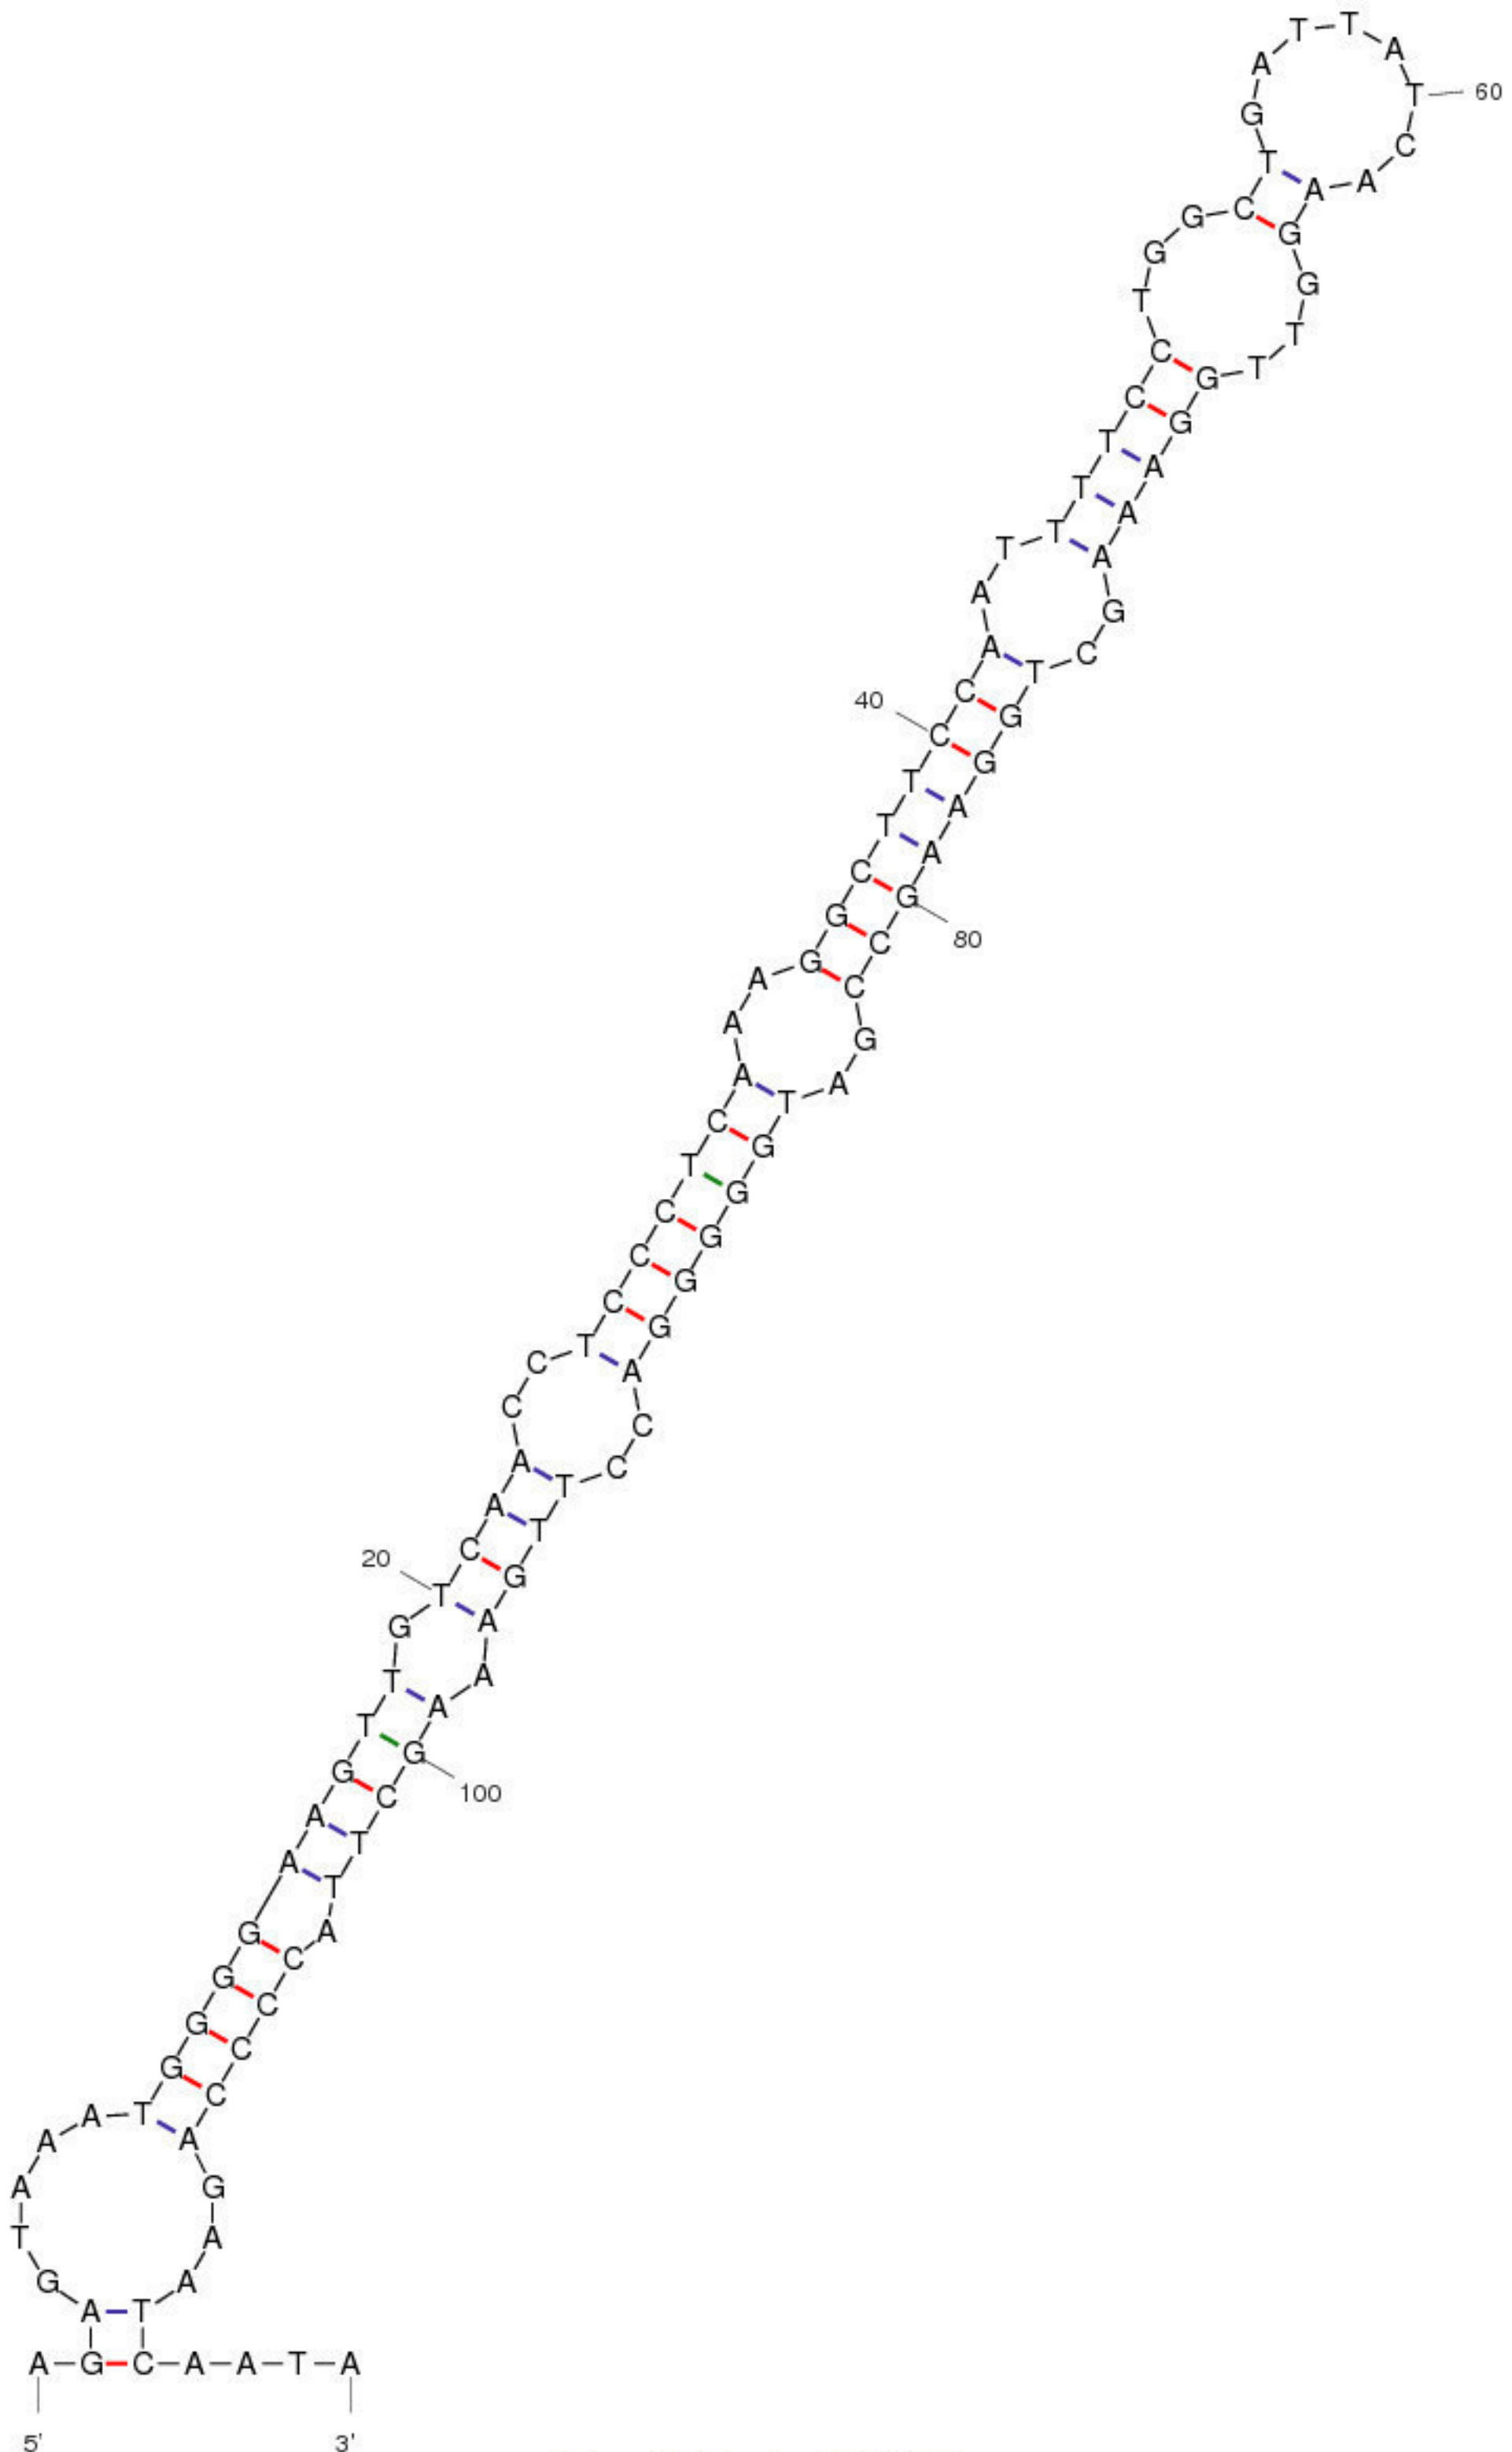

$dG = -53.9$  vvi-miRC477j

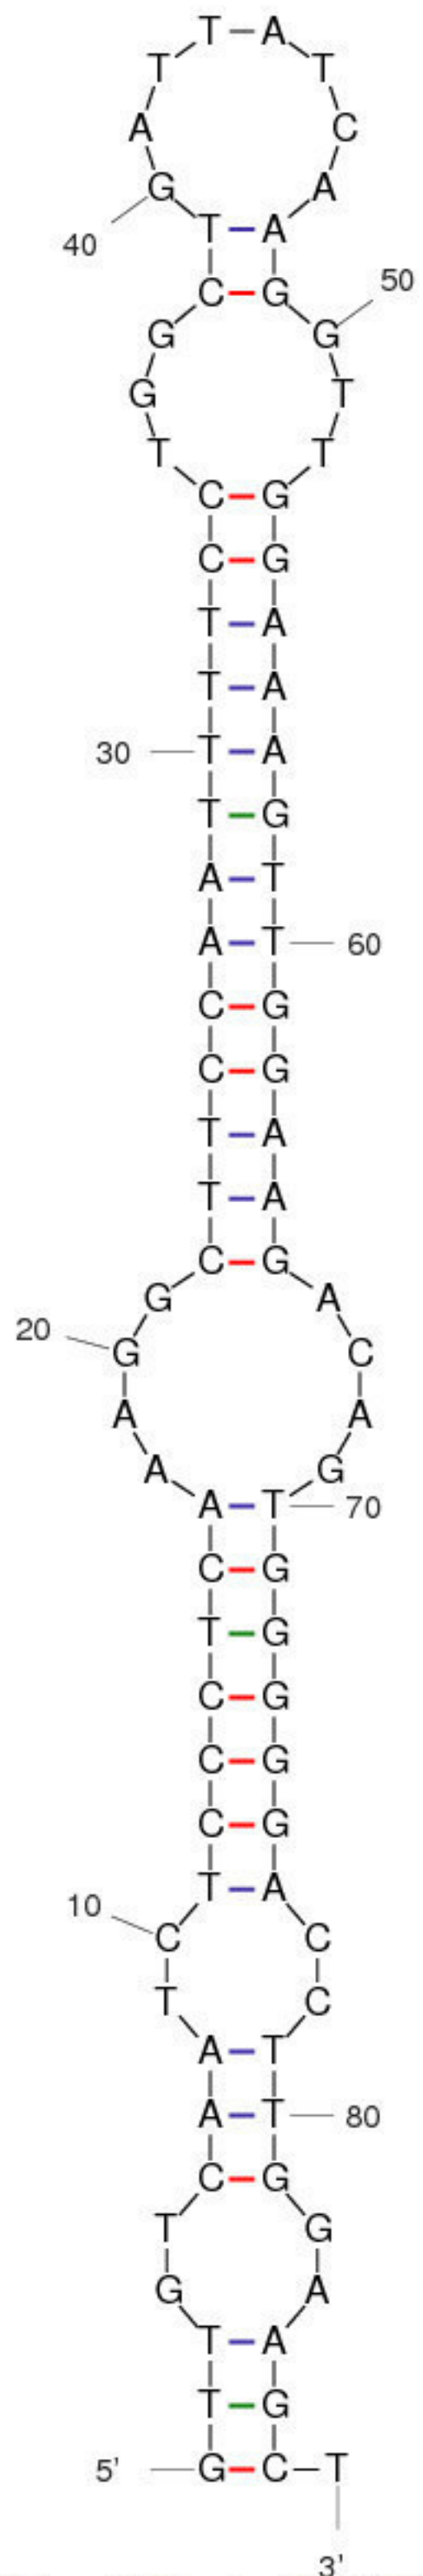

$dG = -36.7$  vvi-miRC477k

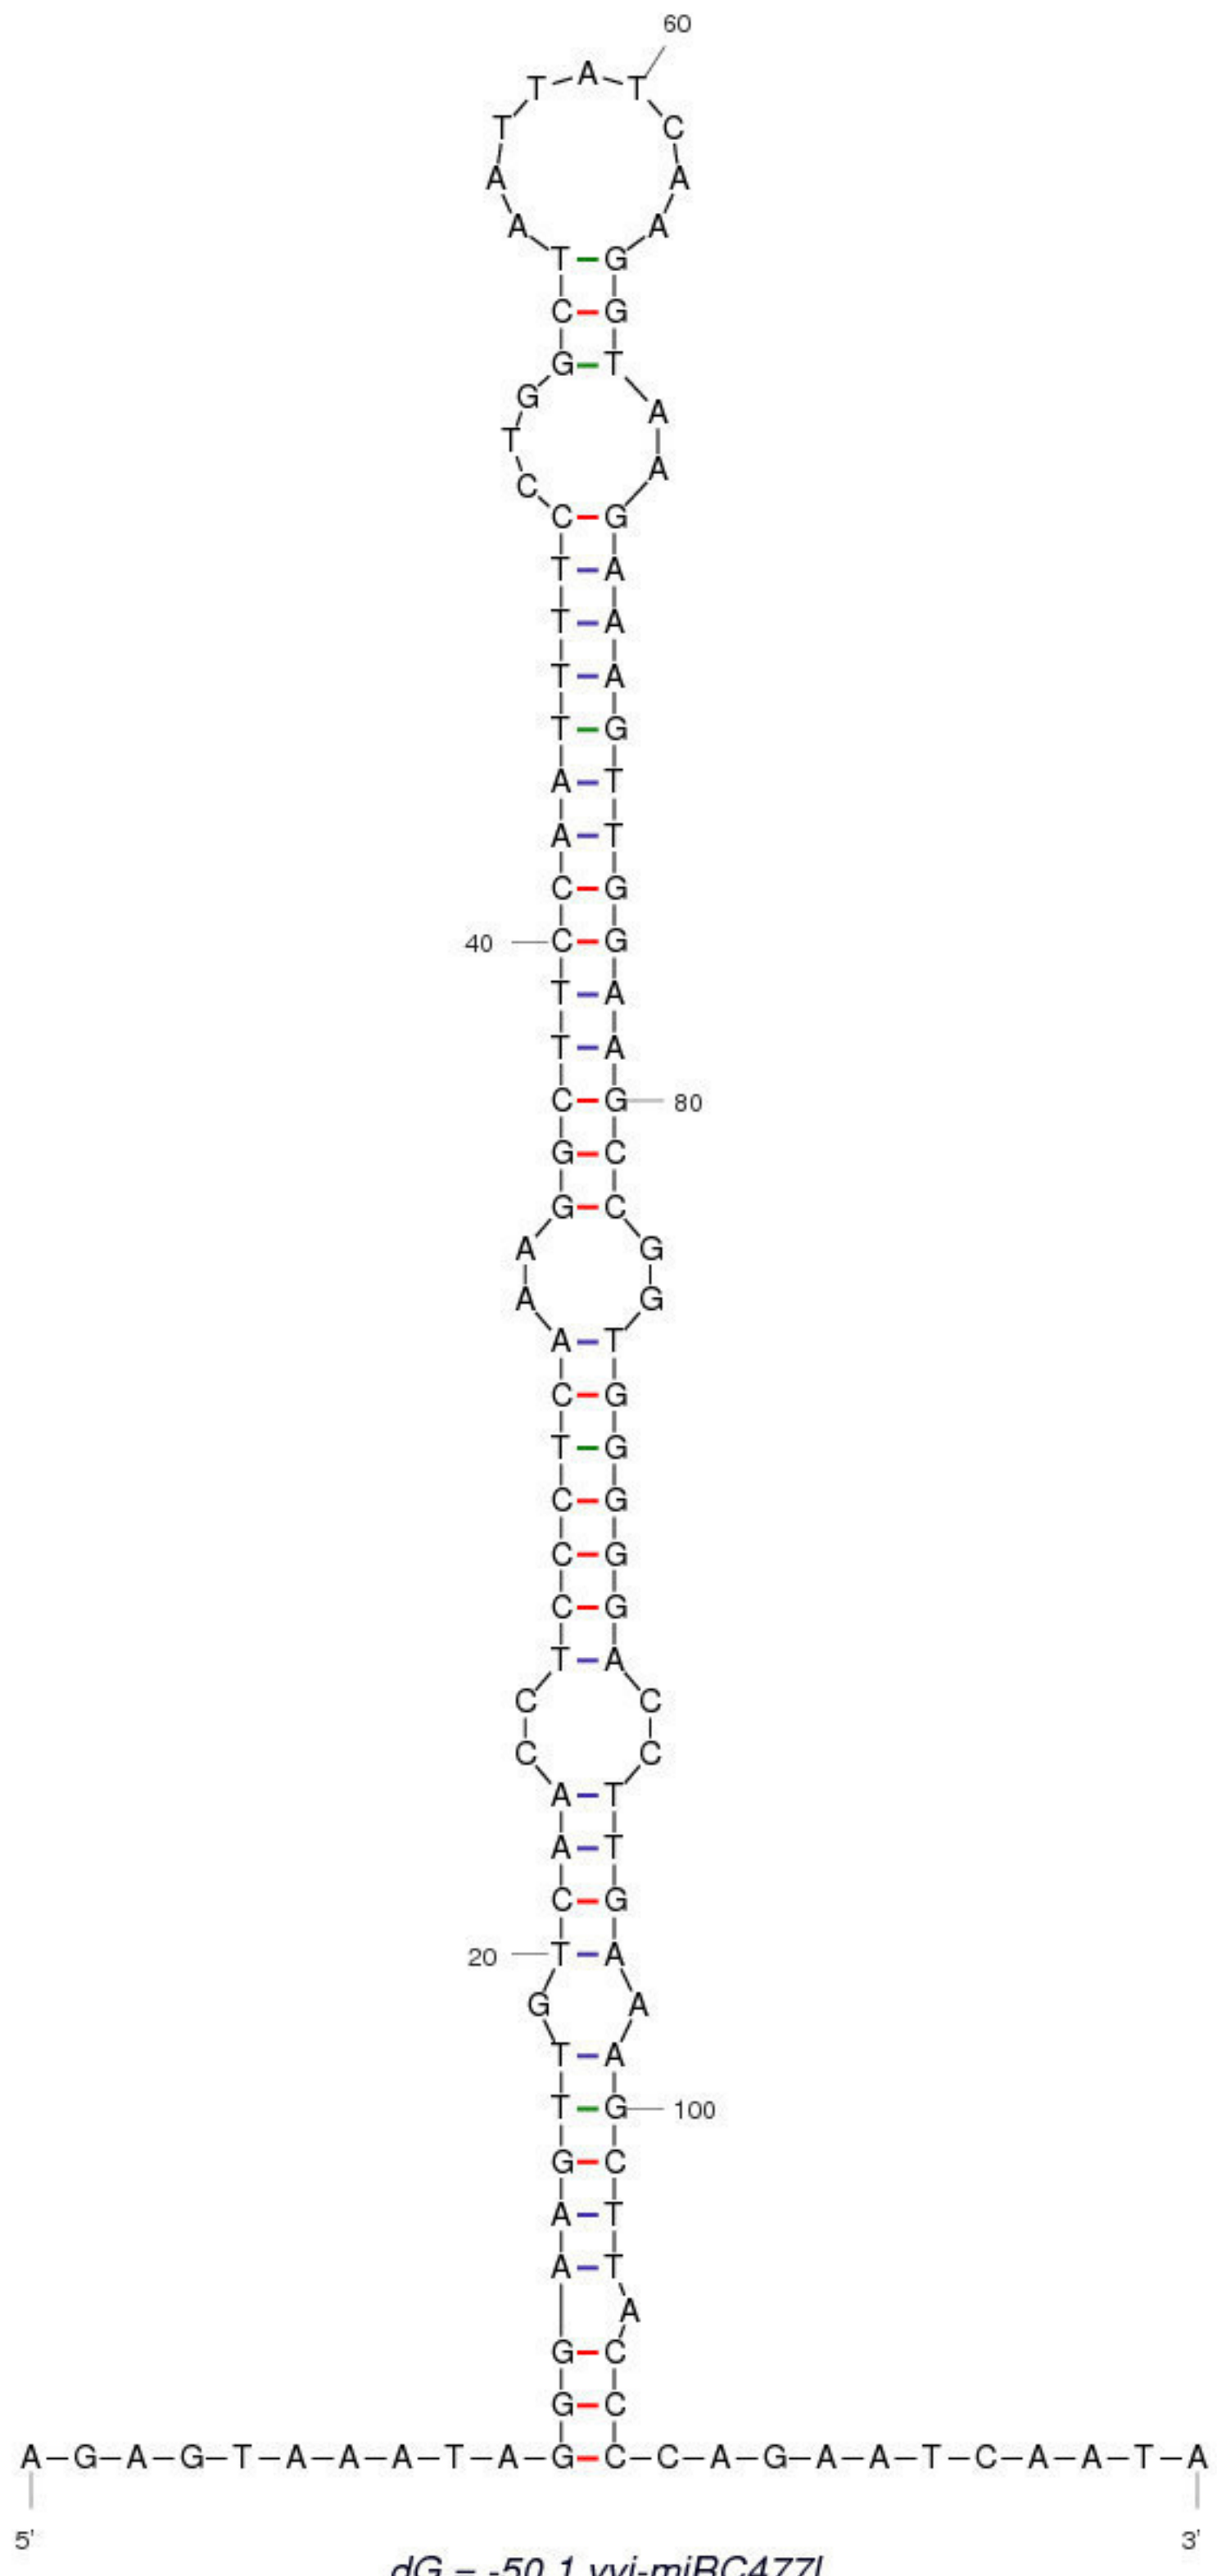

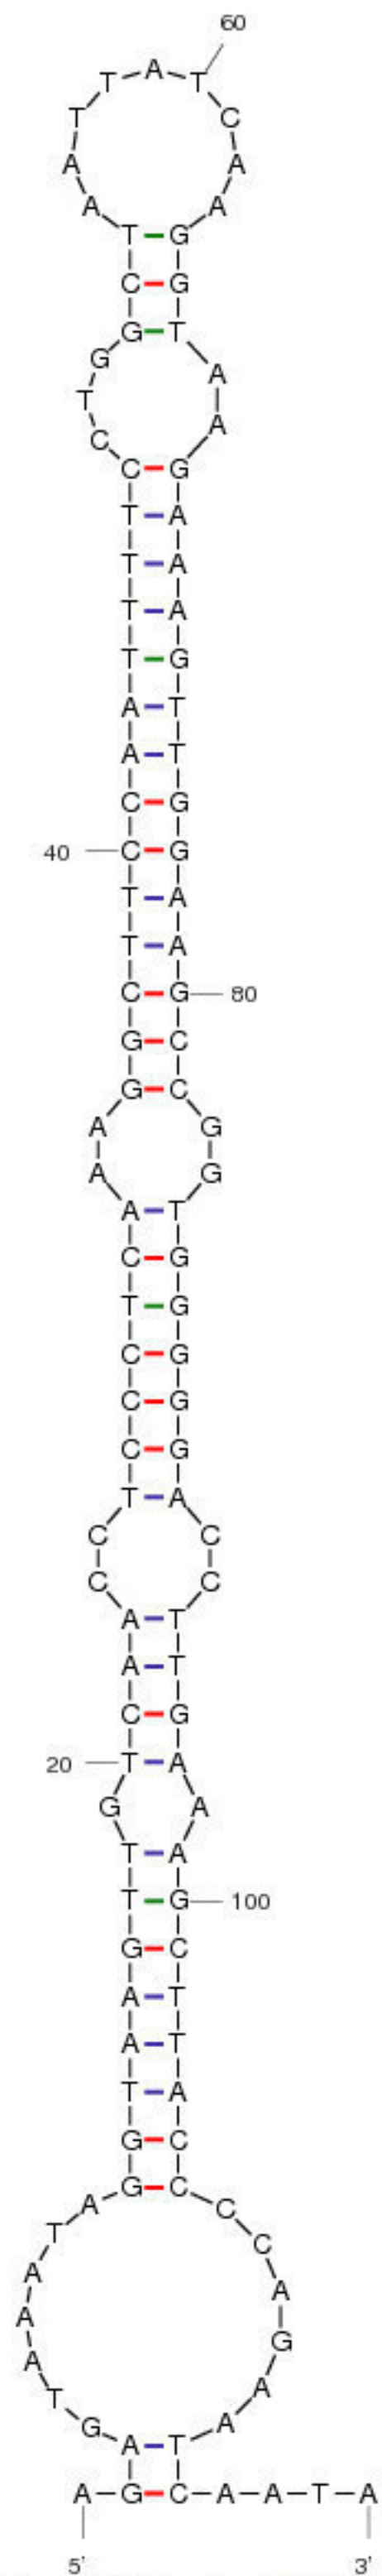

dG = -51.9 vvi-miRC477m

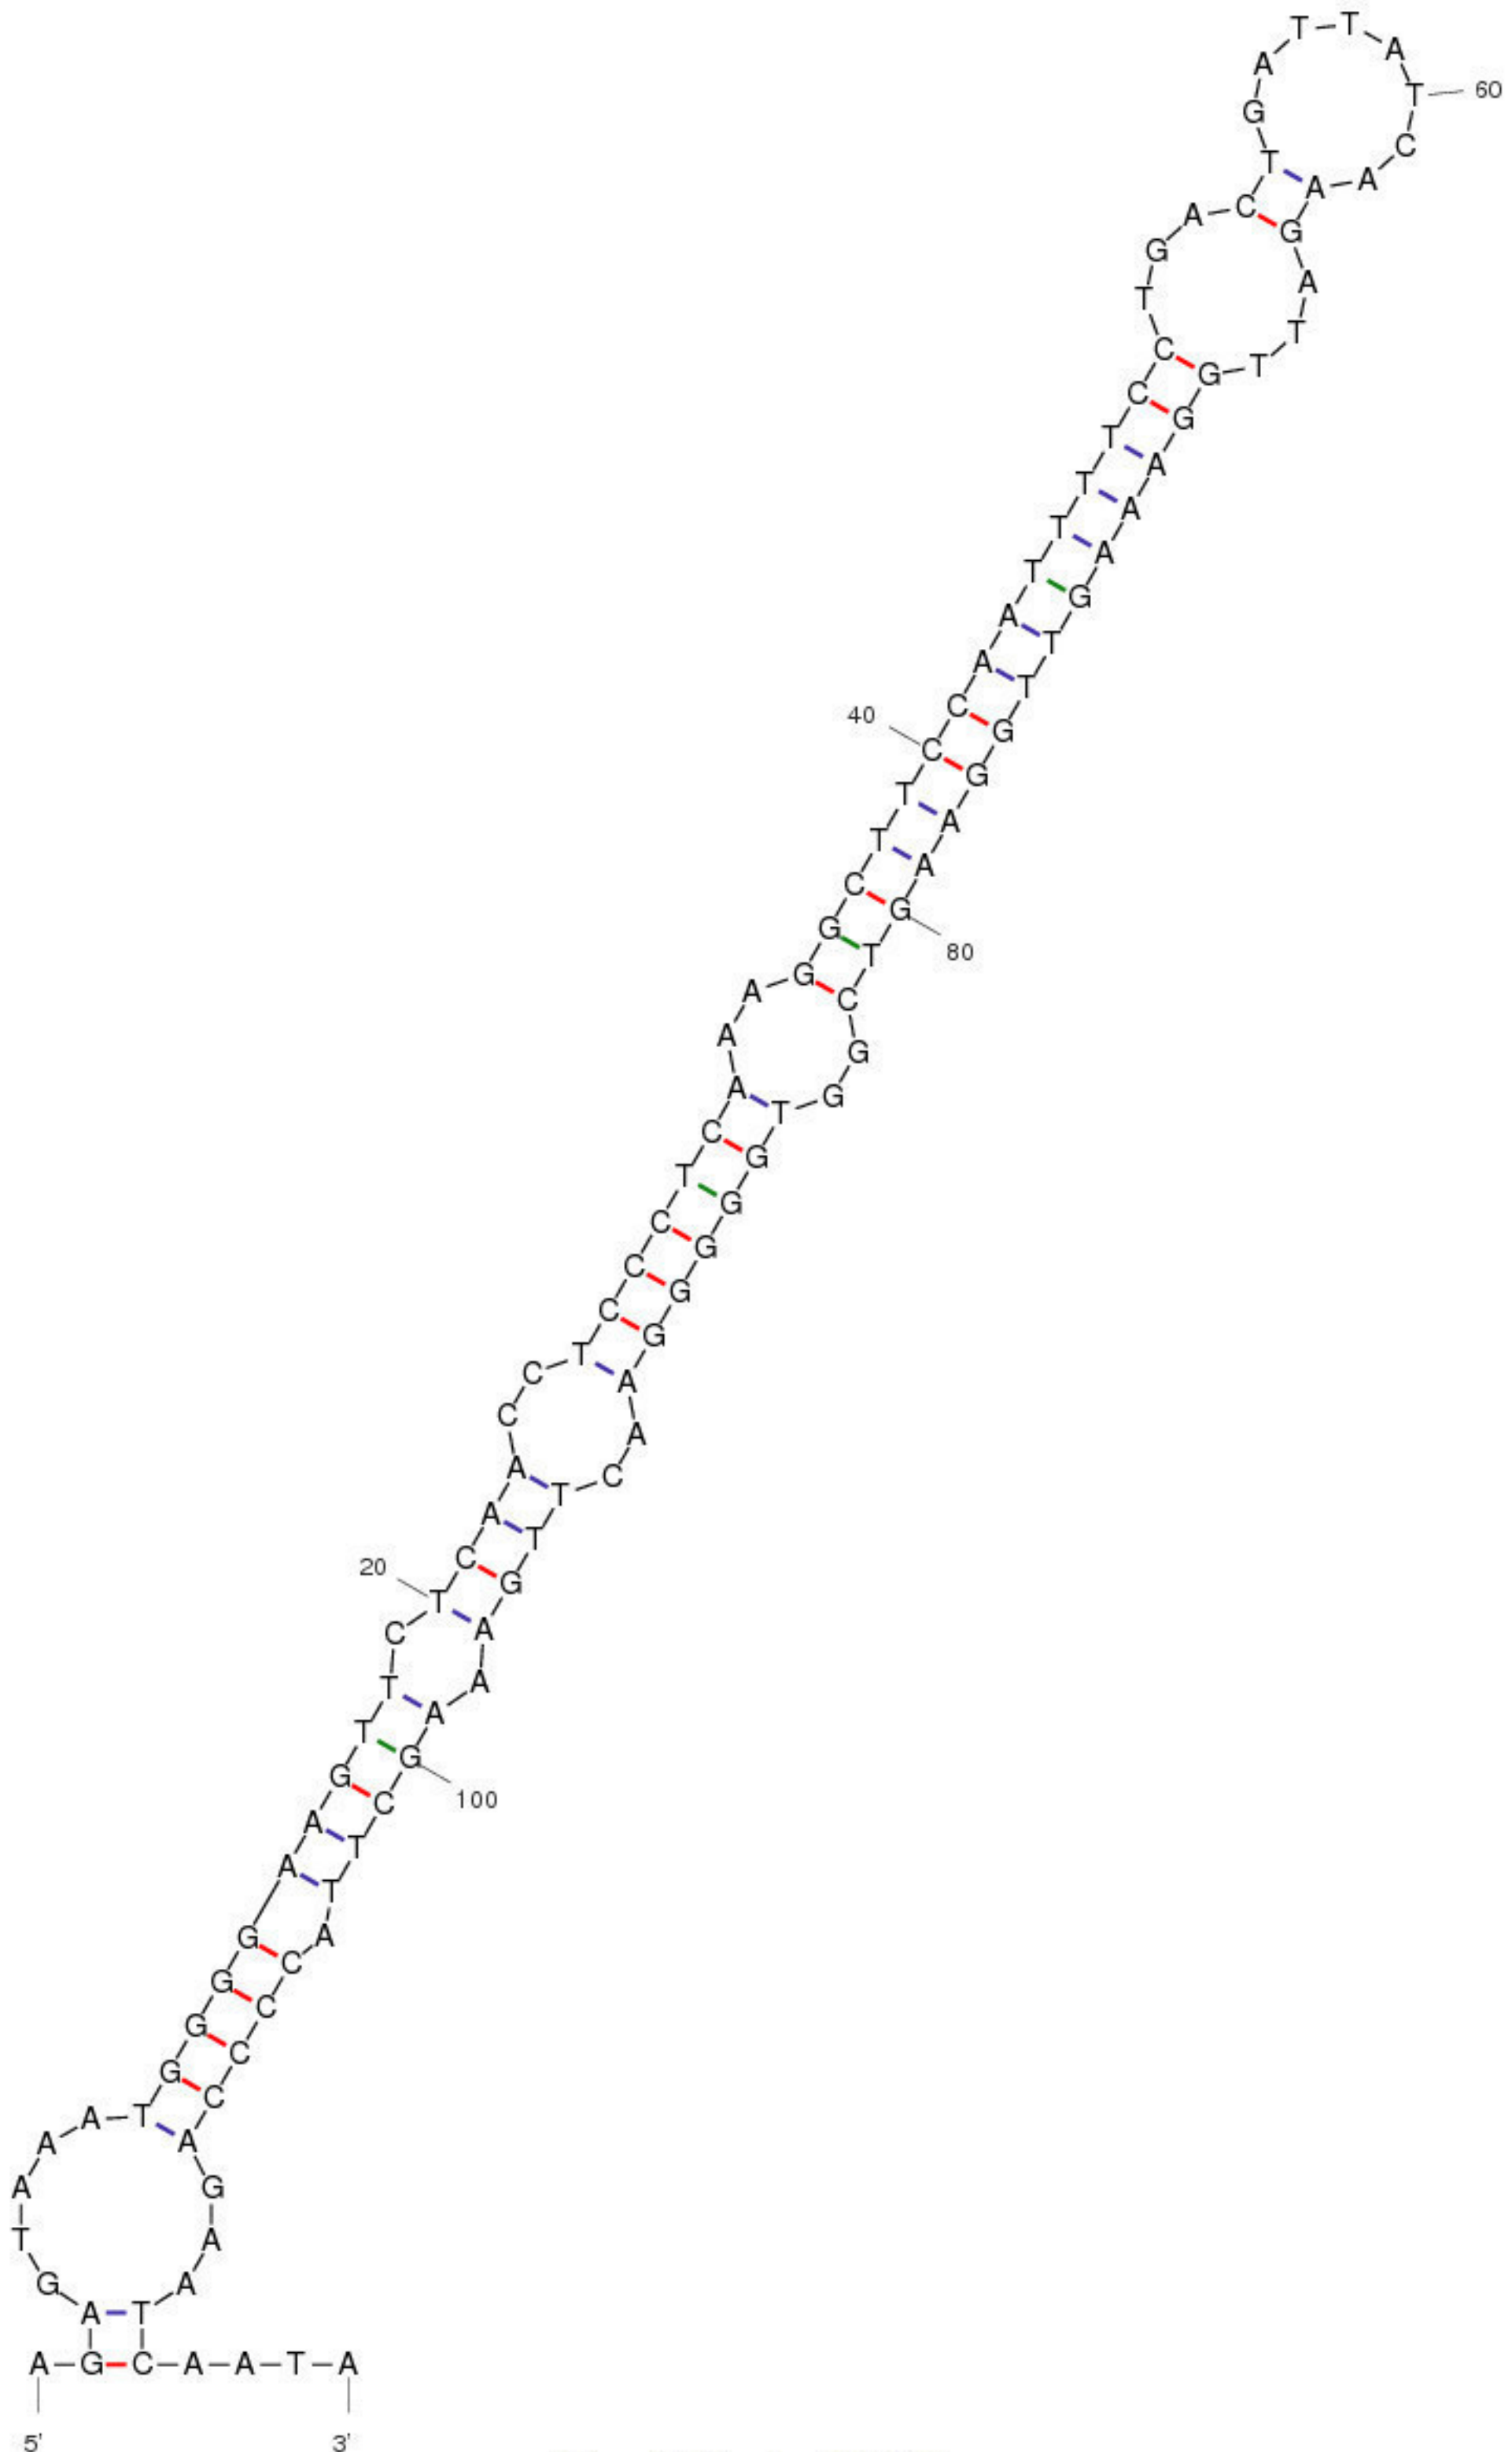

$dG = -56.4$  vvi-miRC477n



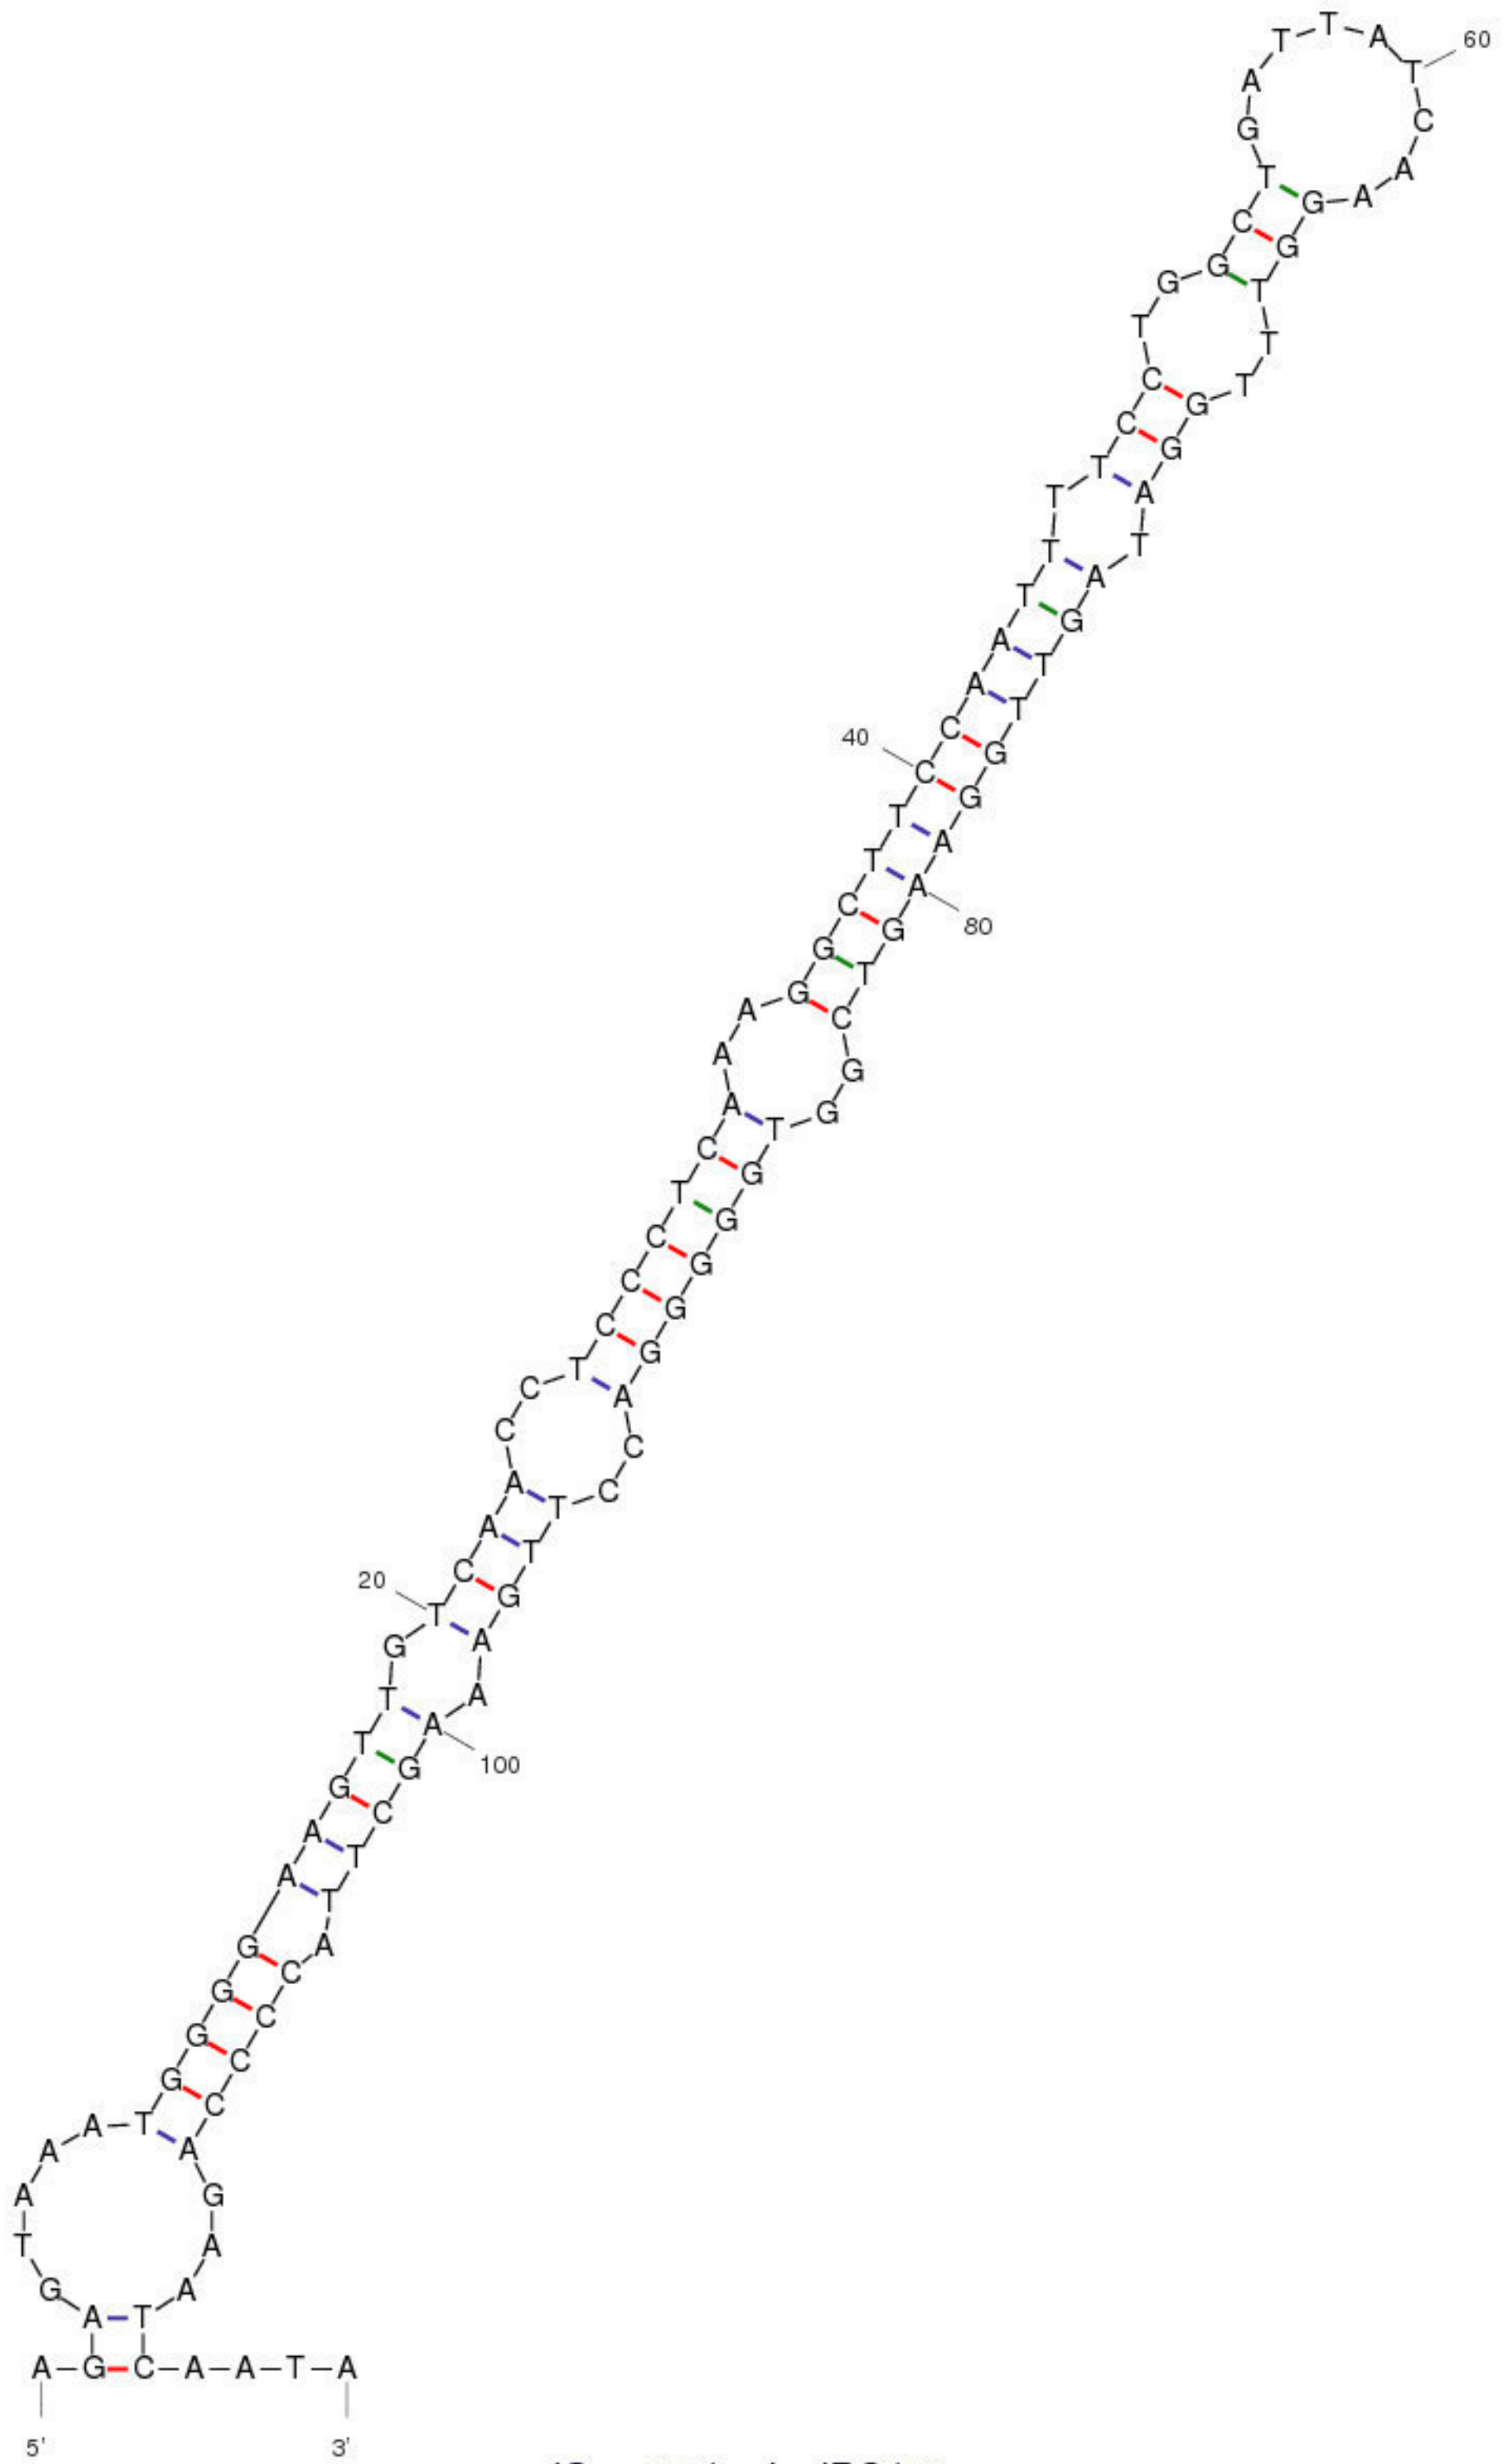

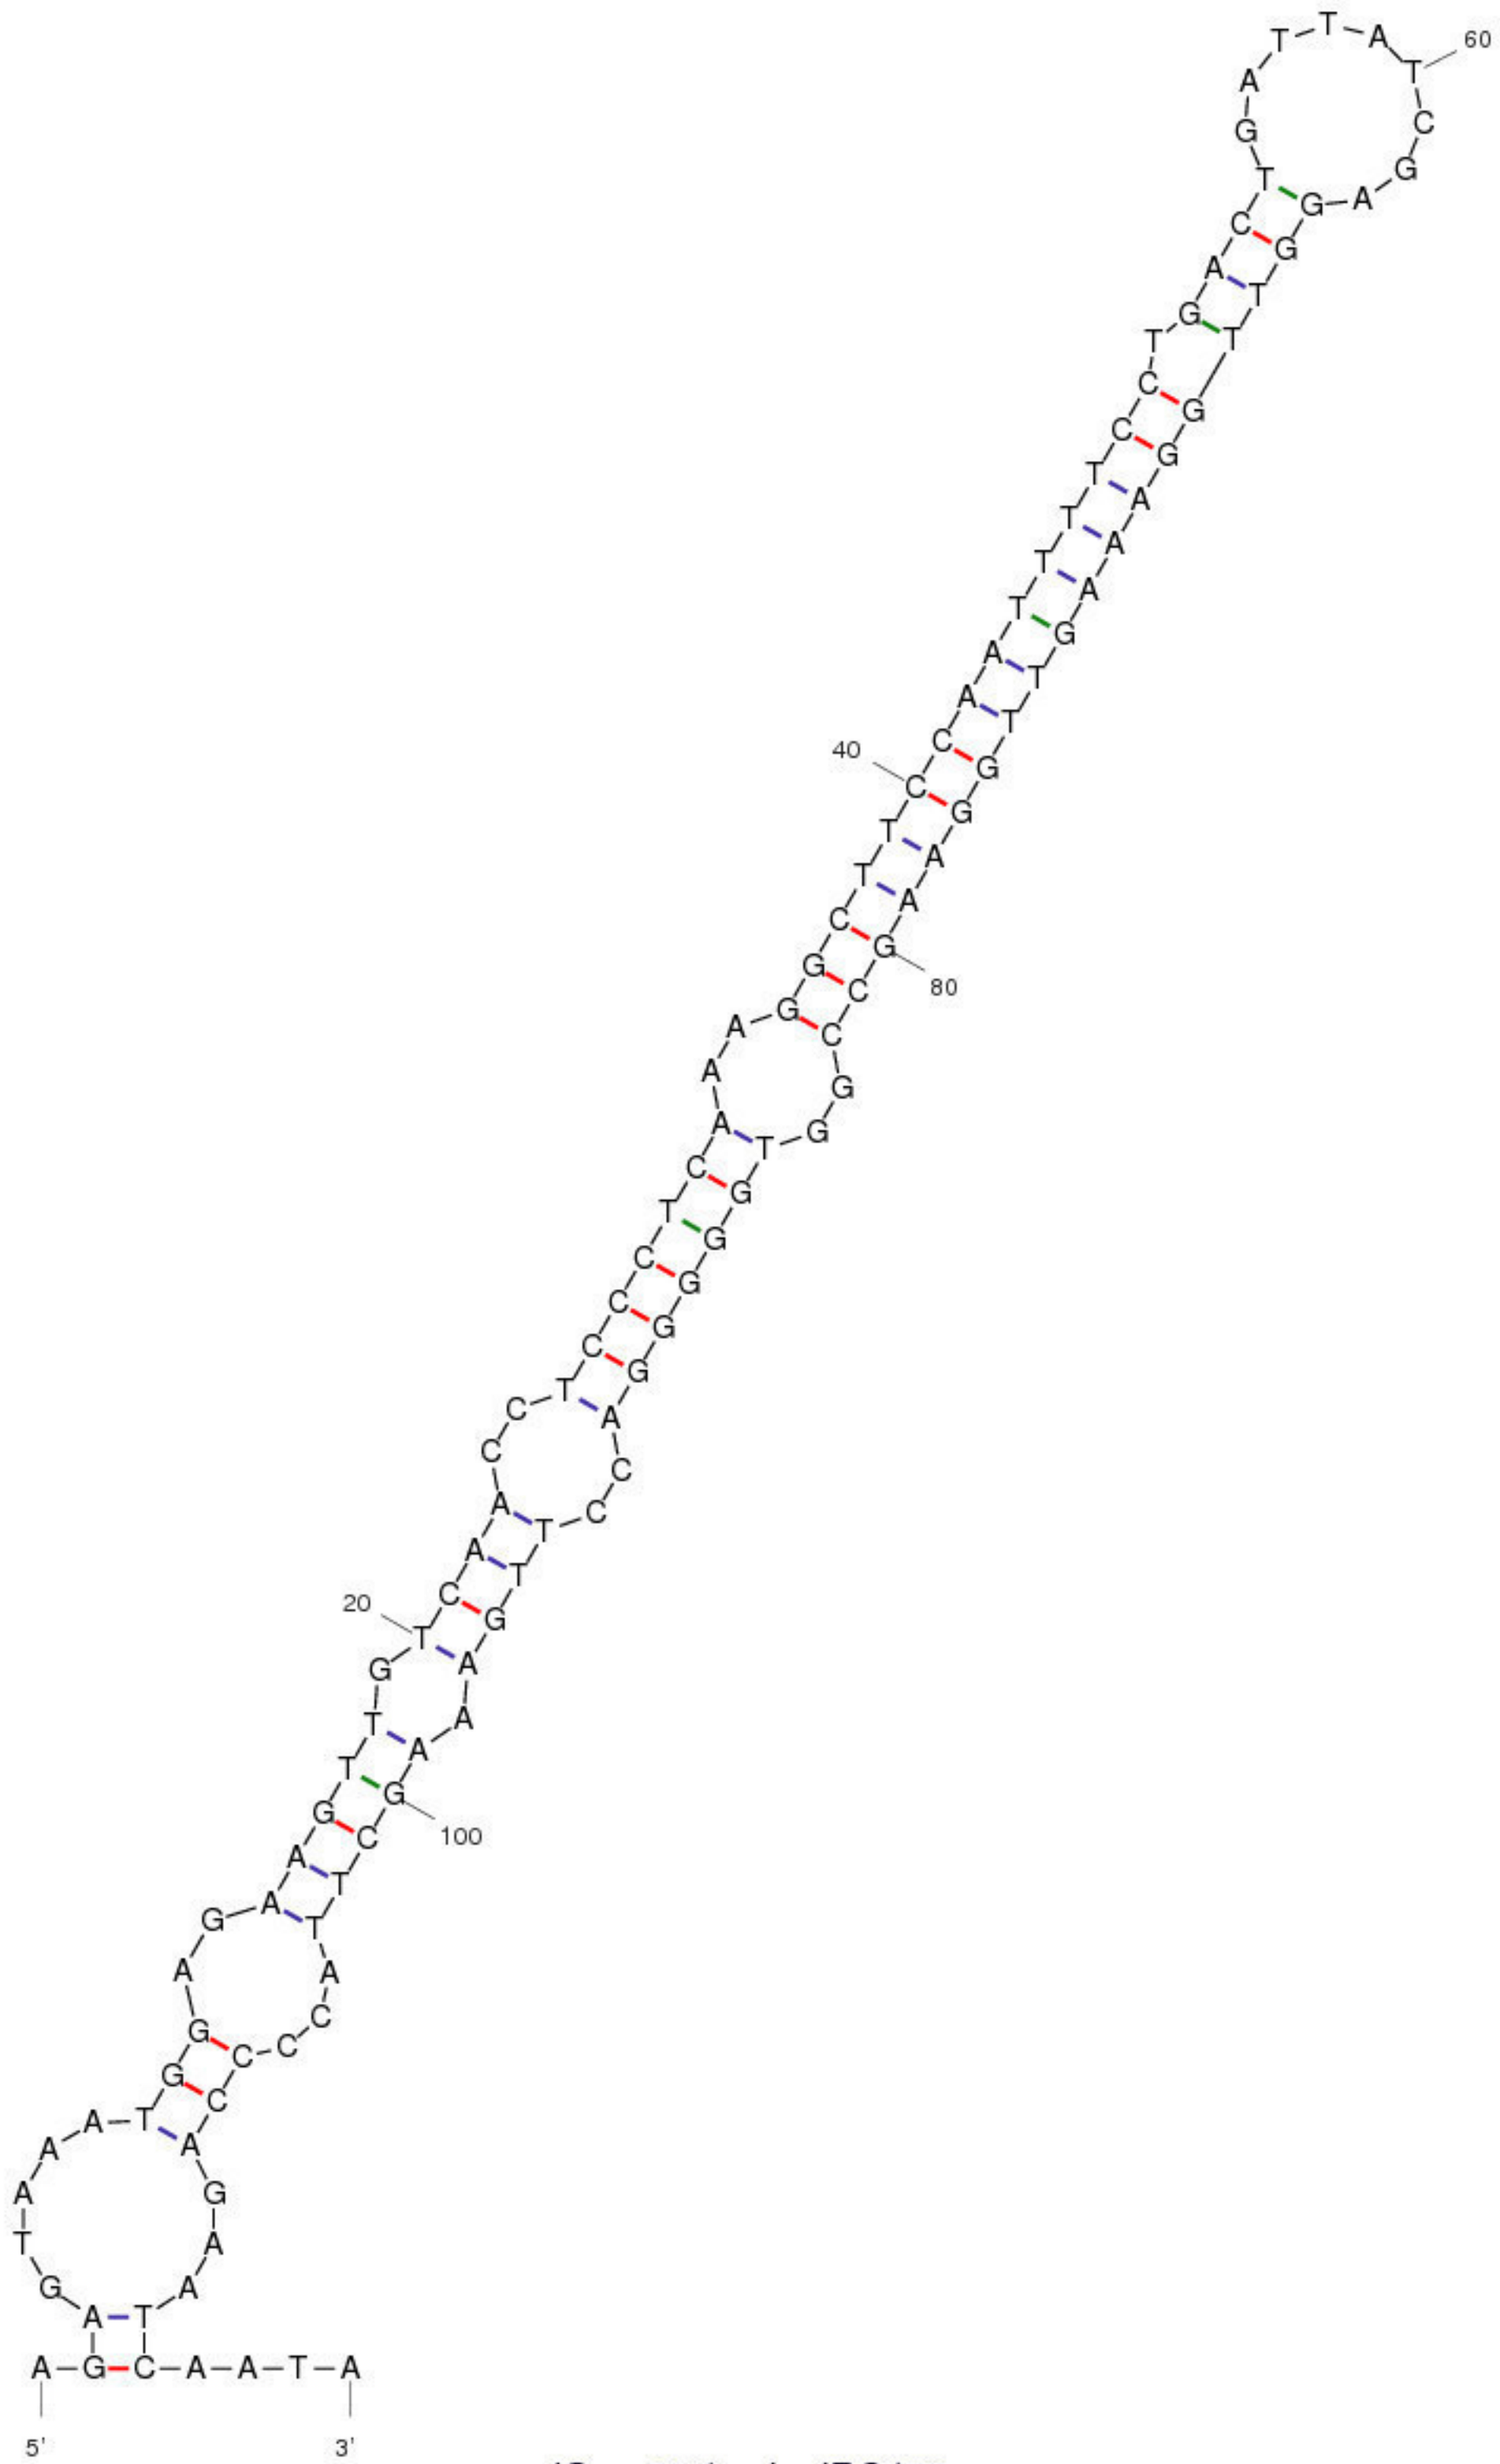

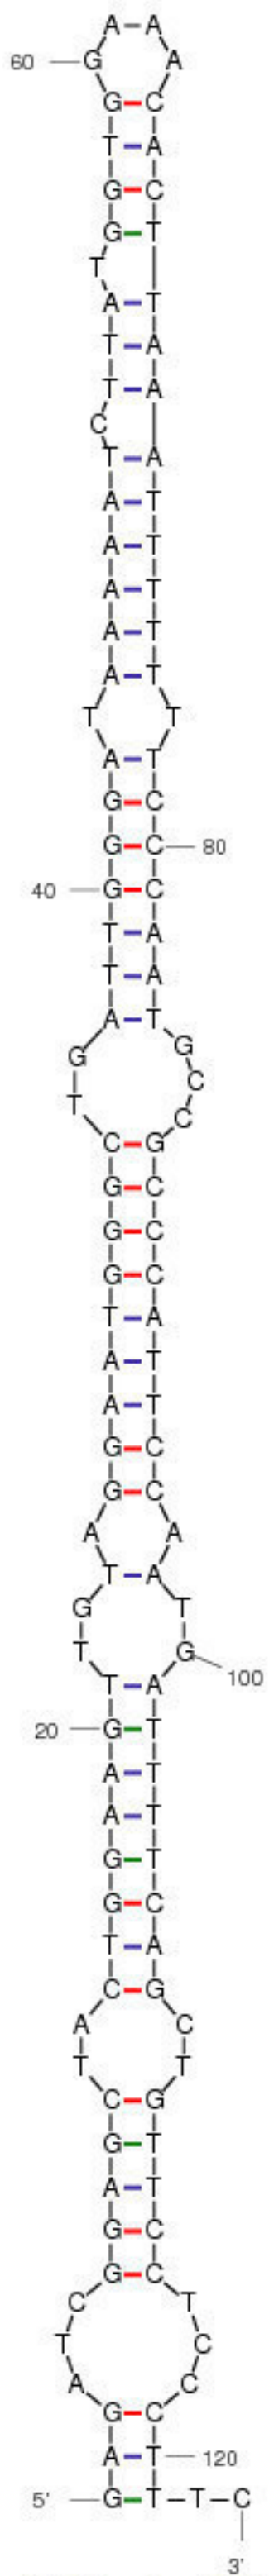

*dG* = -56.2 vvi-miRC482a

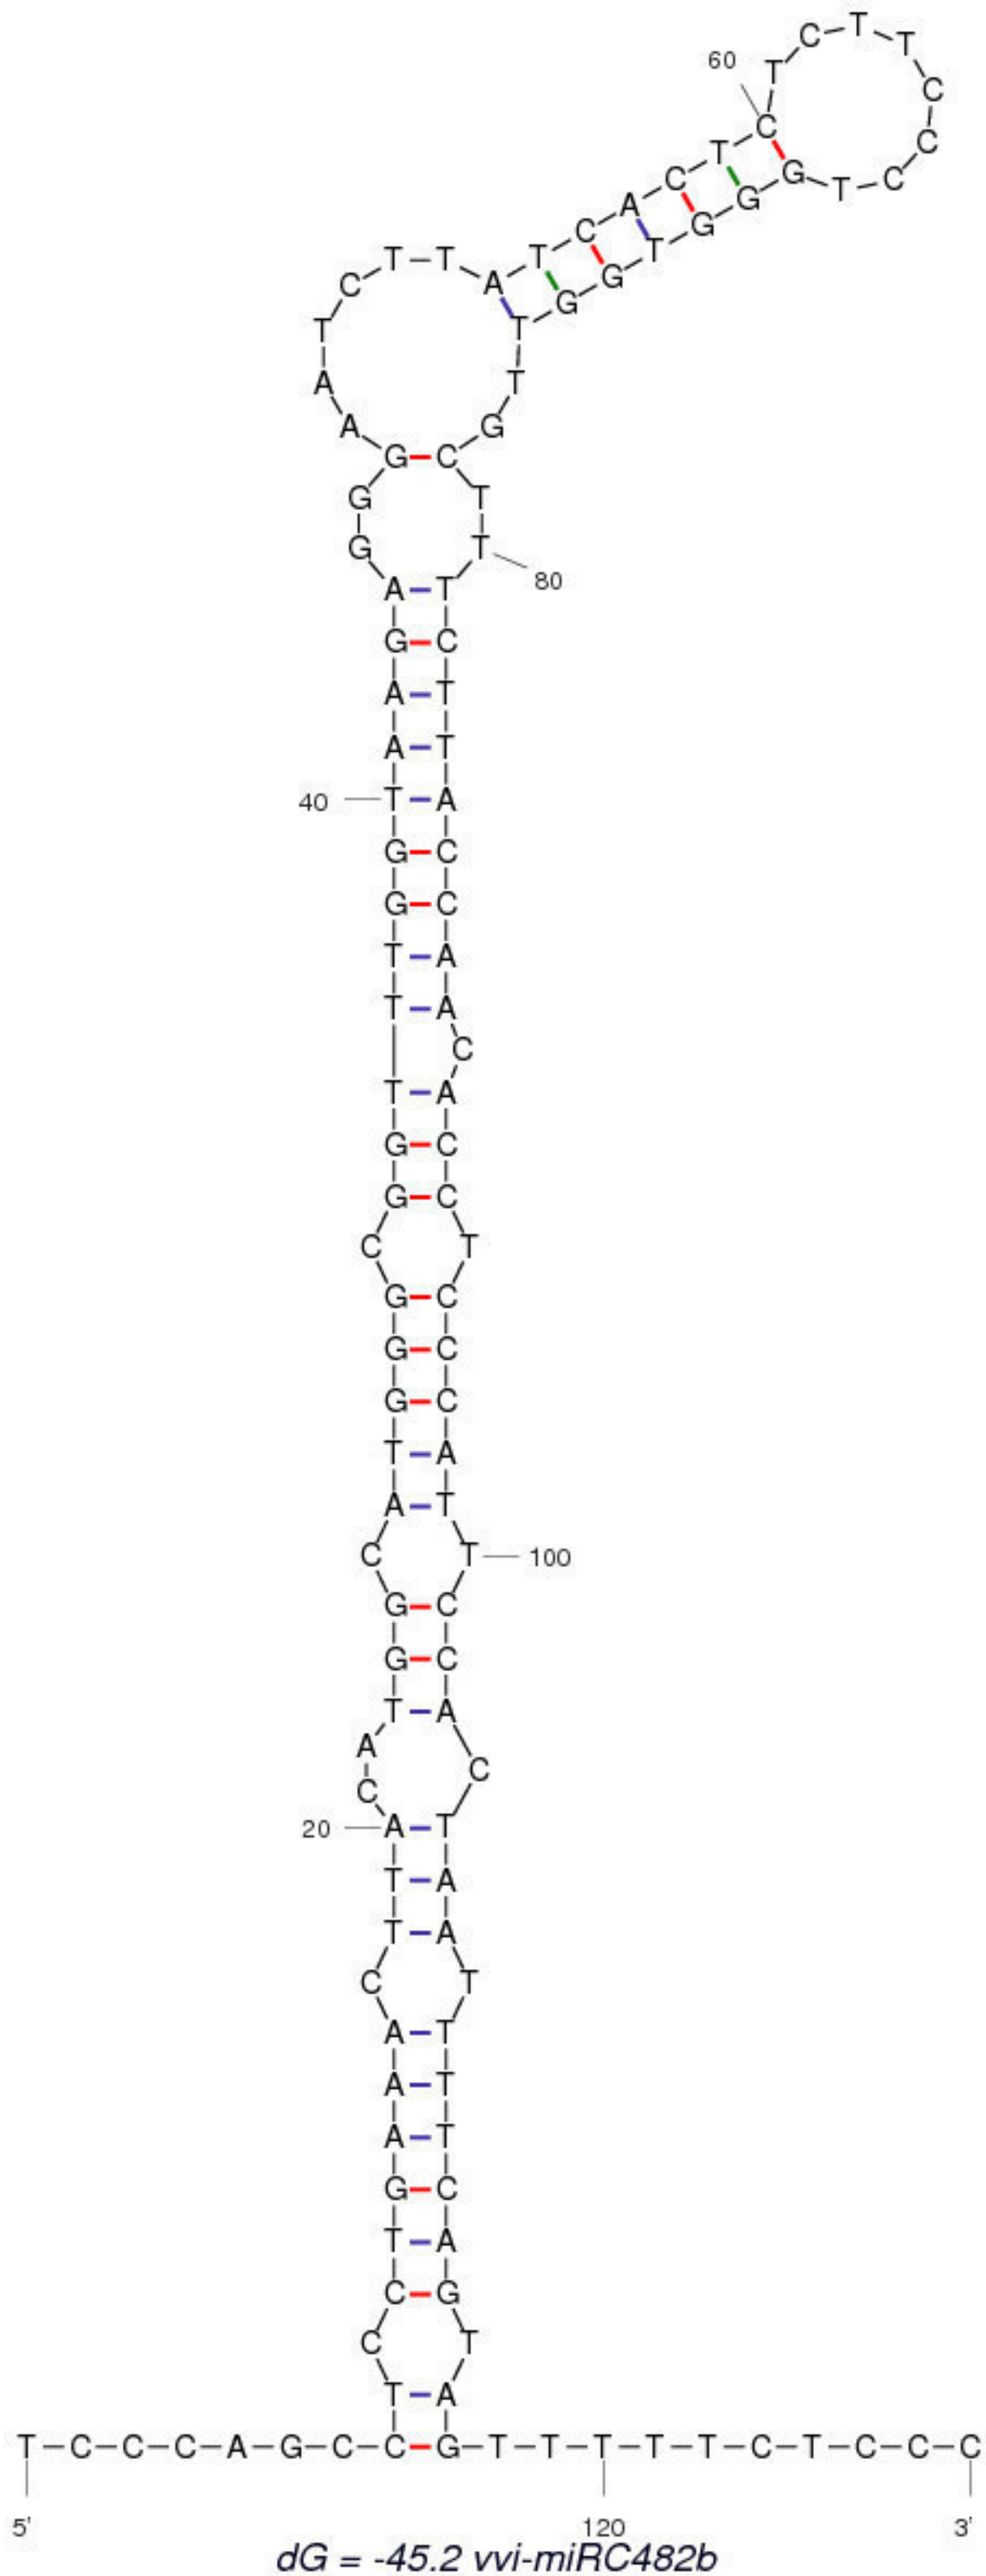

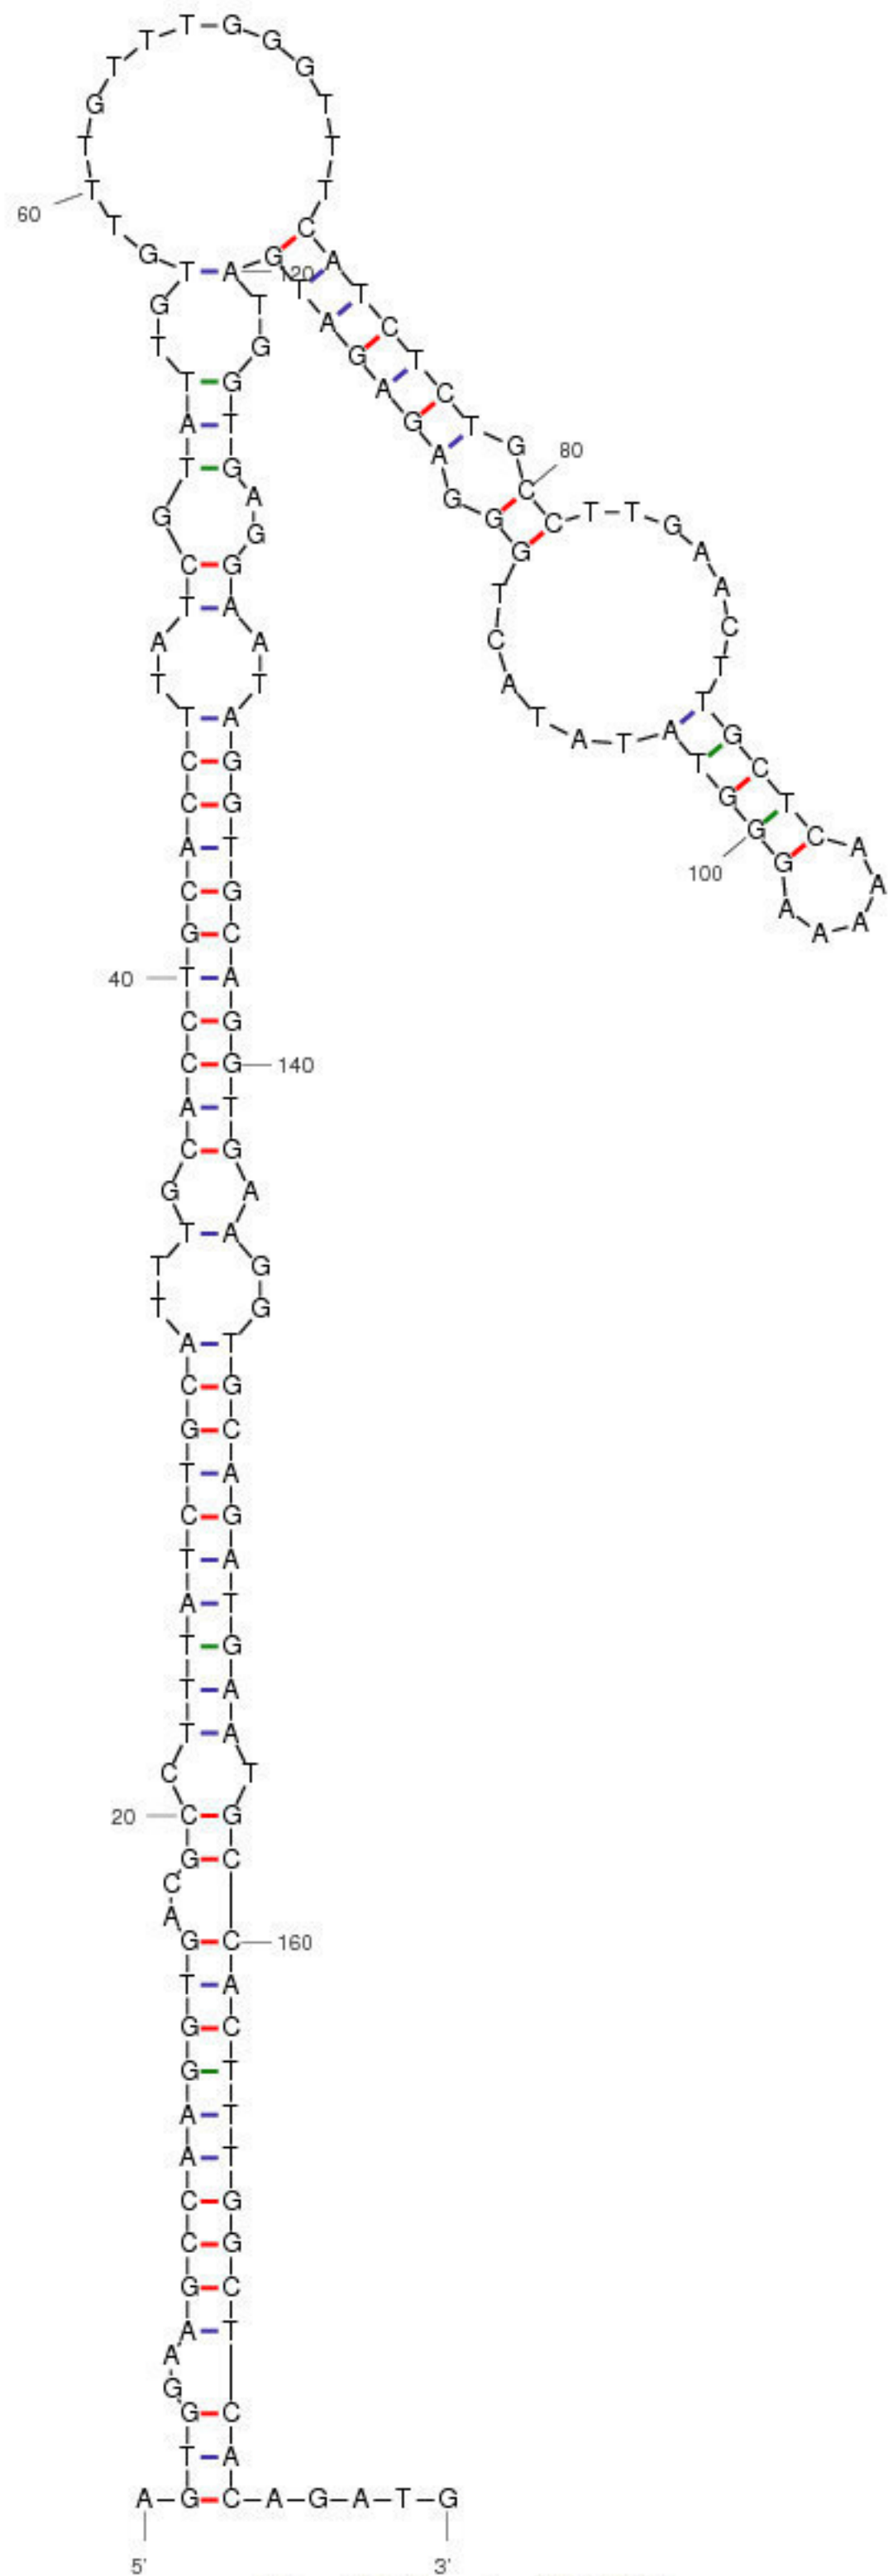

*dG* = -76.2 vvi-miRC530

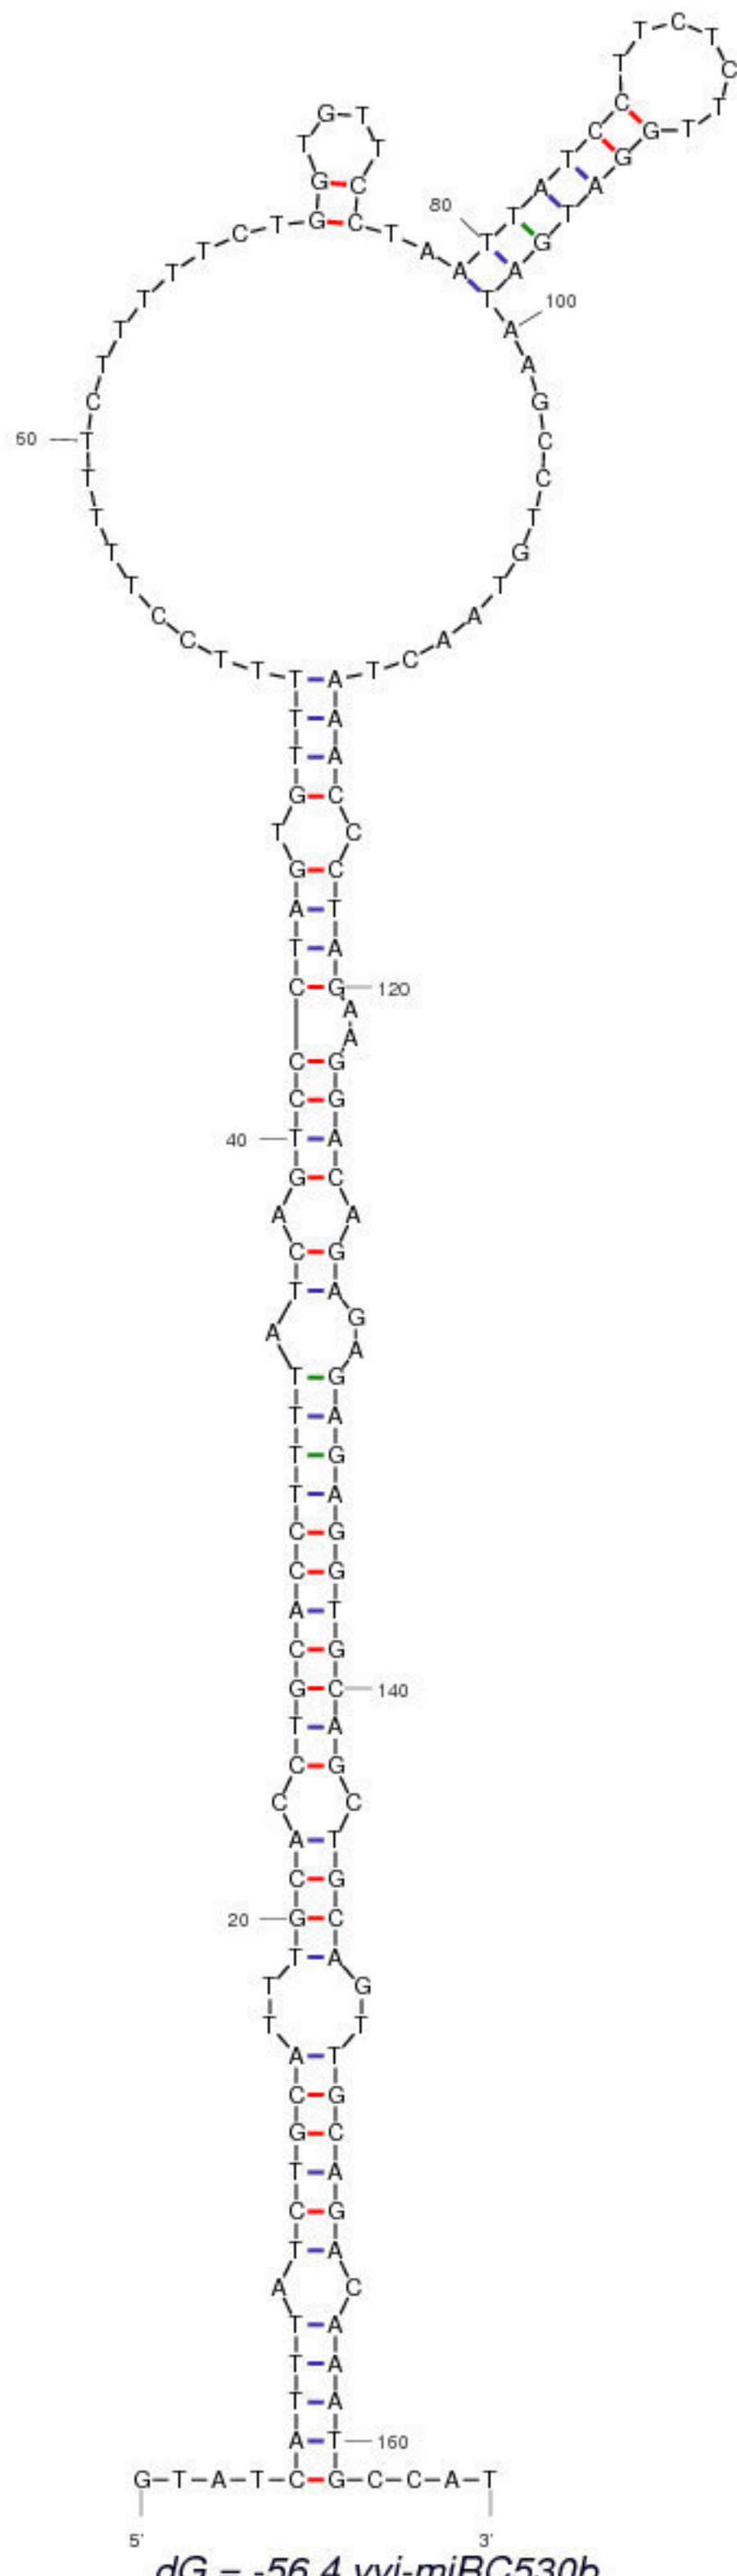

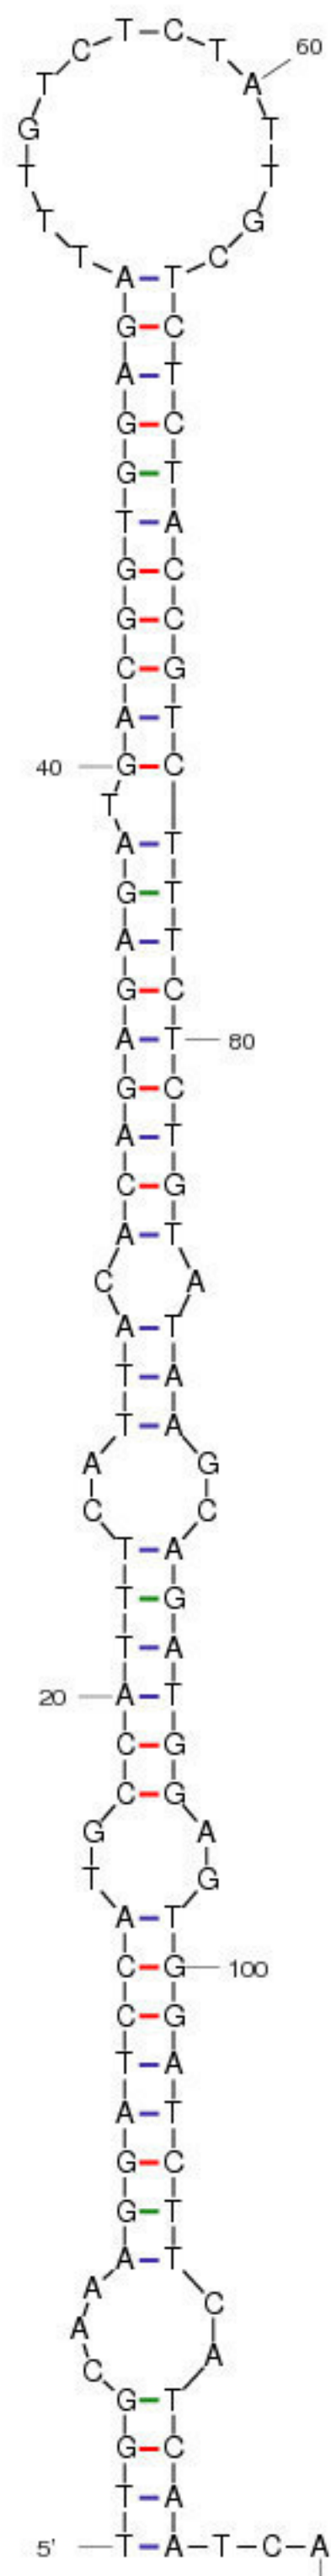

*dG* = -50.6 vvi-miRC7122

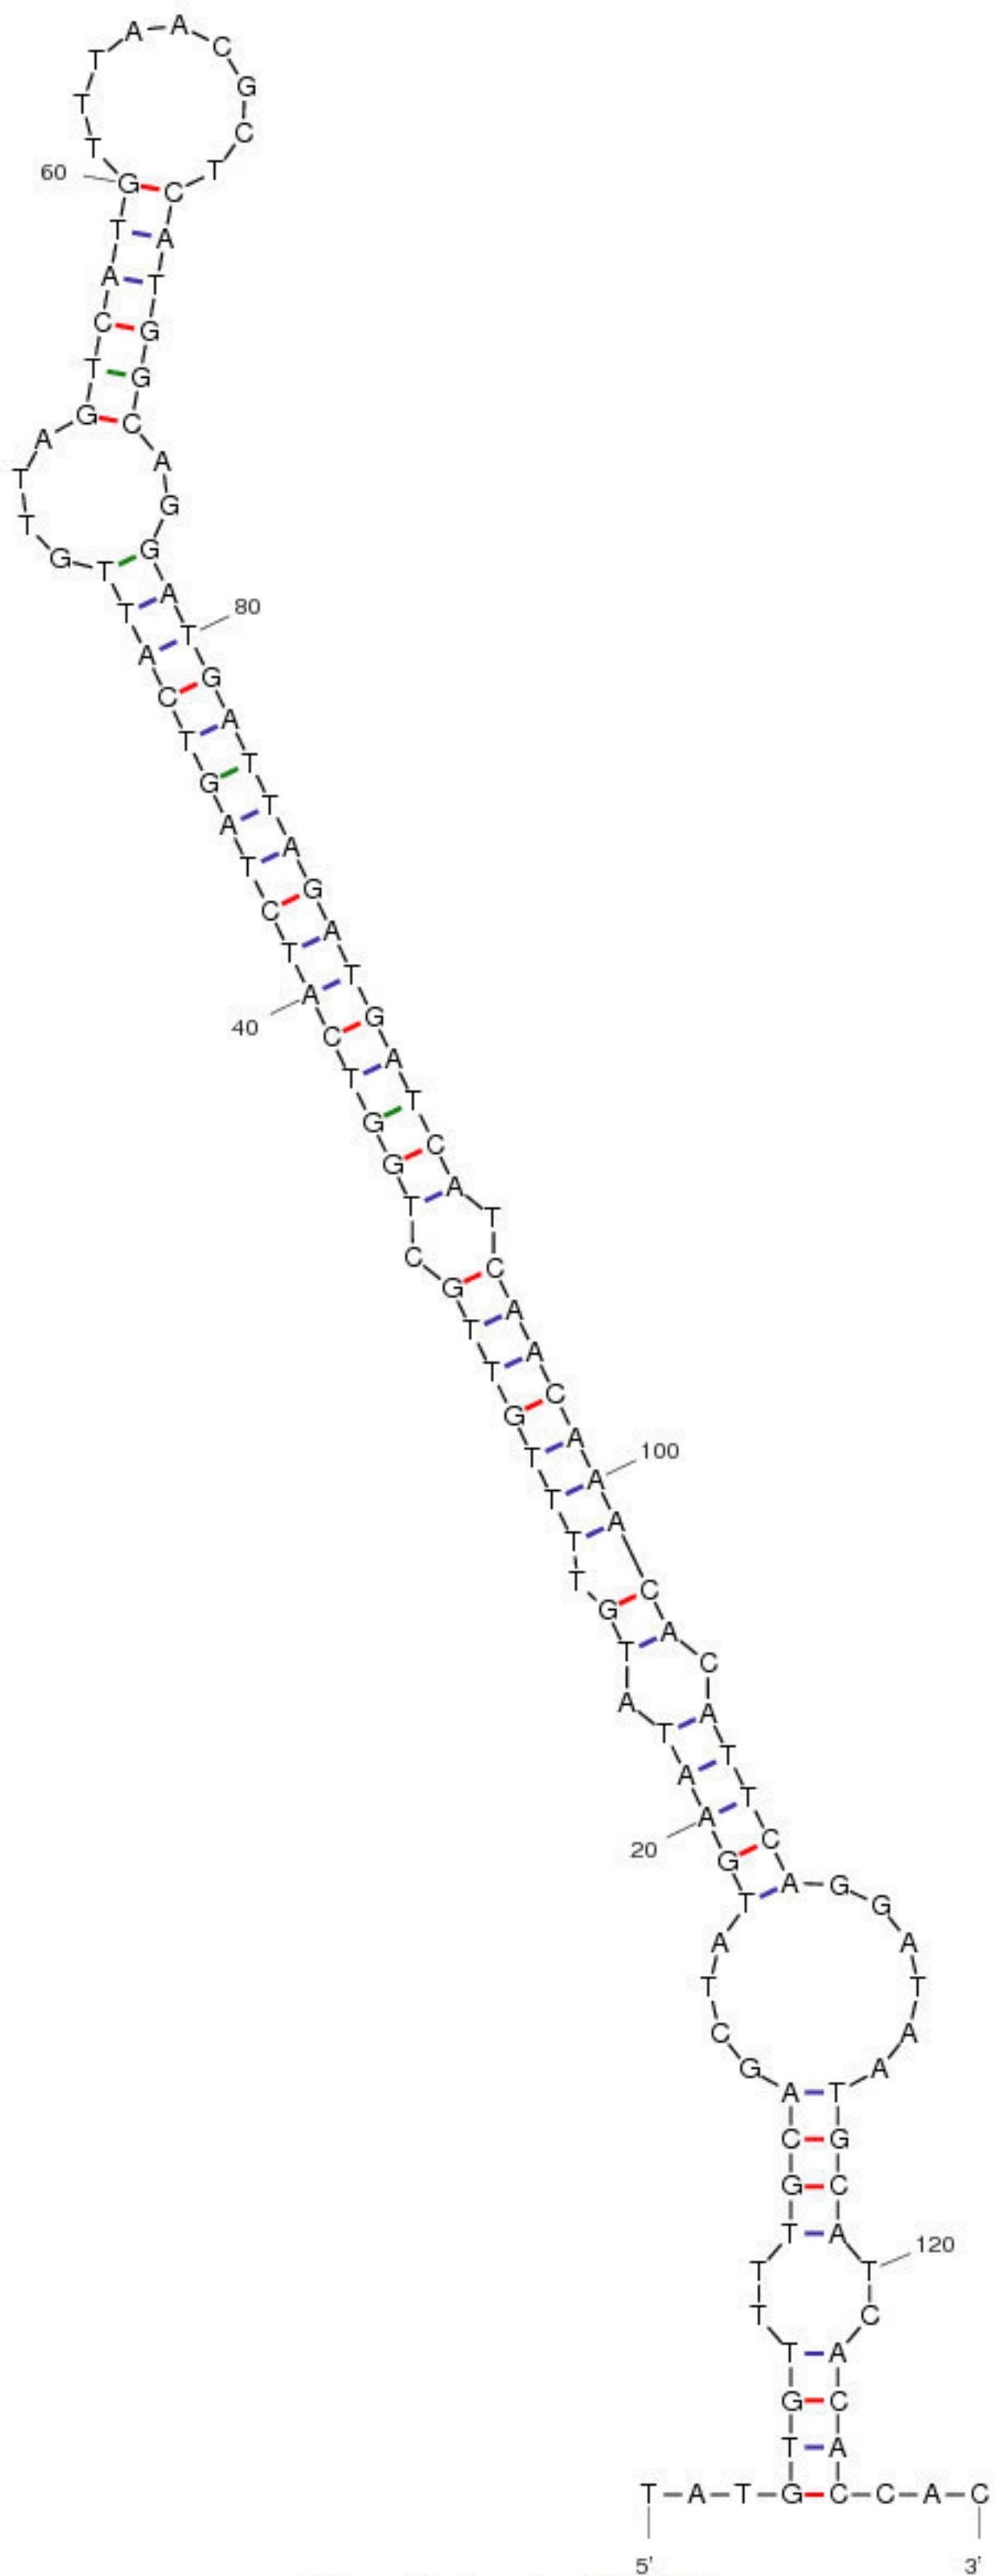

$dG = -49.8$  vvi-miRC827



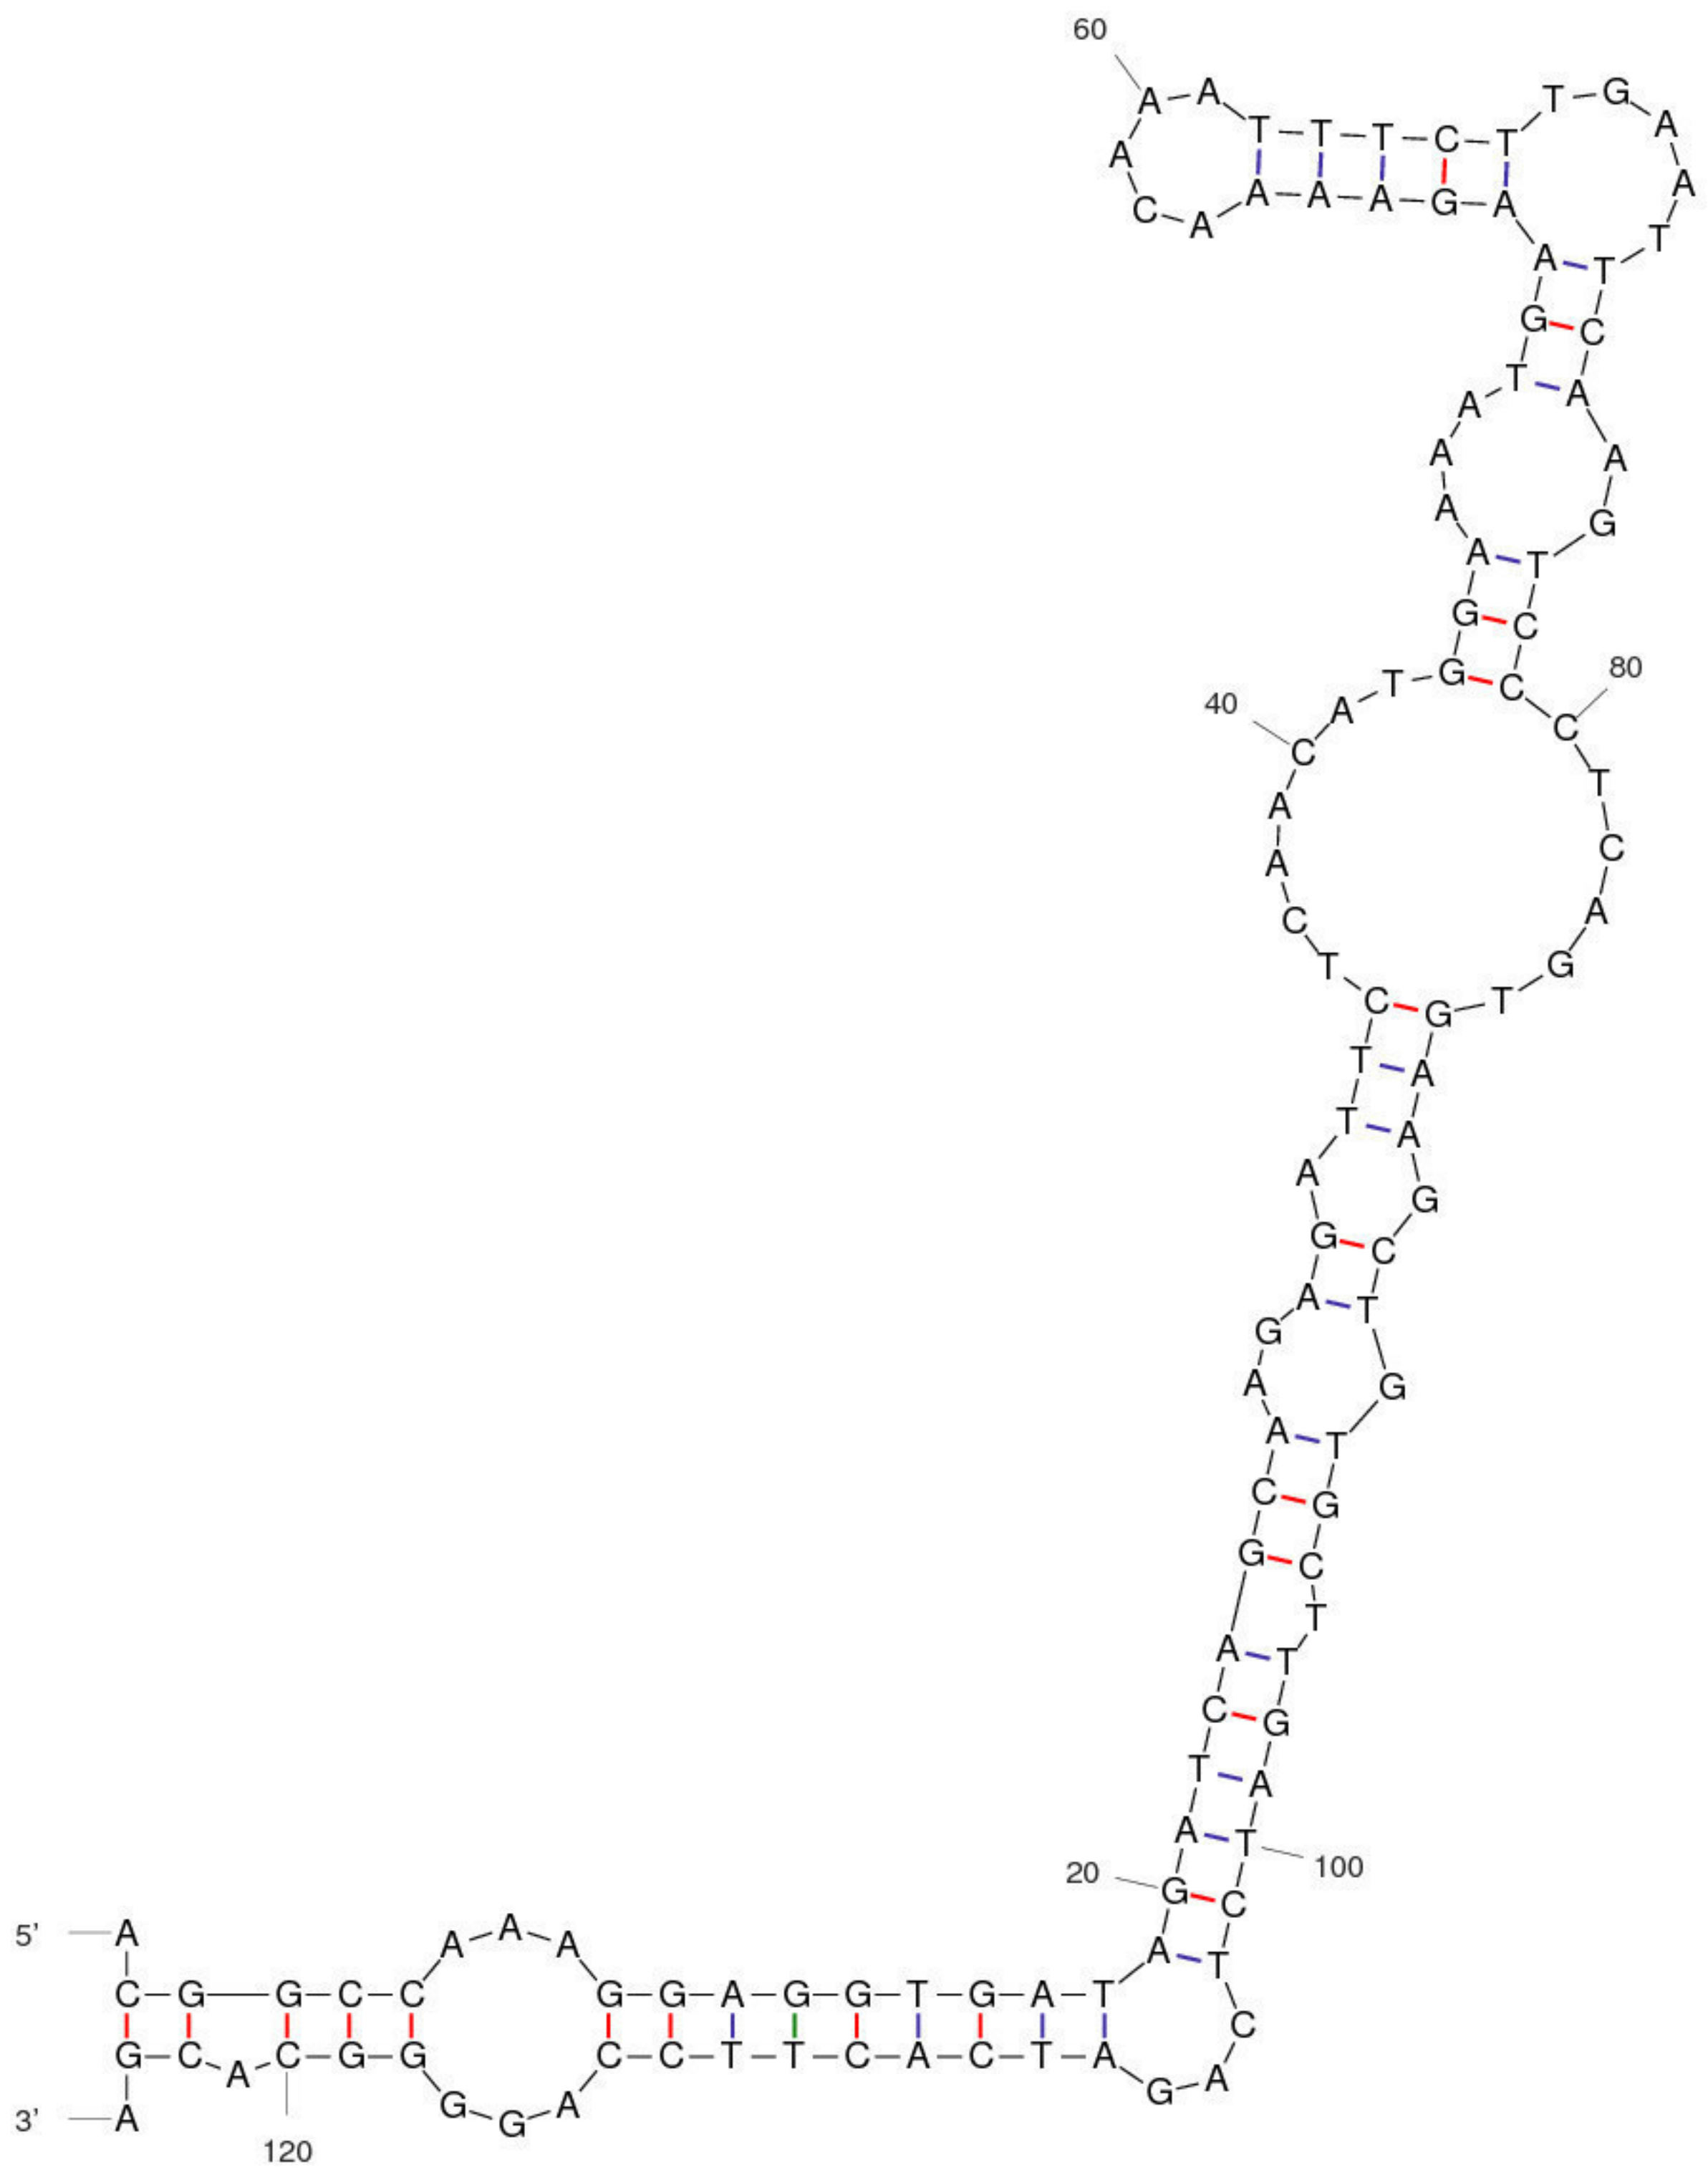

dG = -37.7 grape-m0642

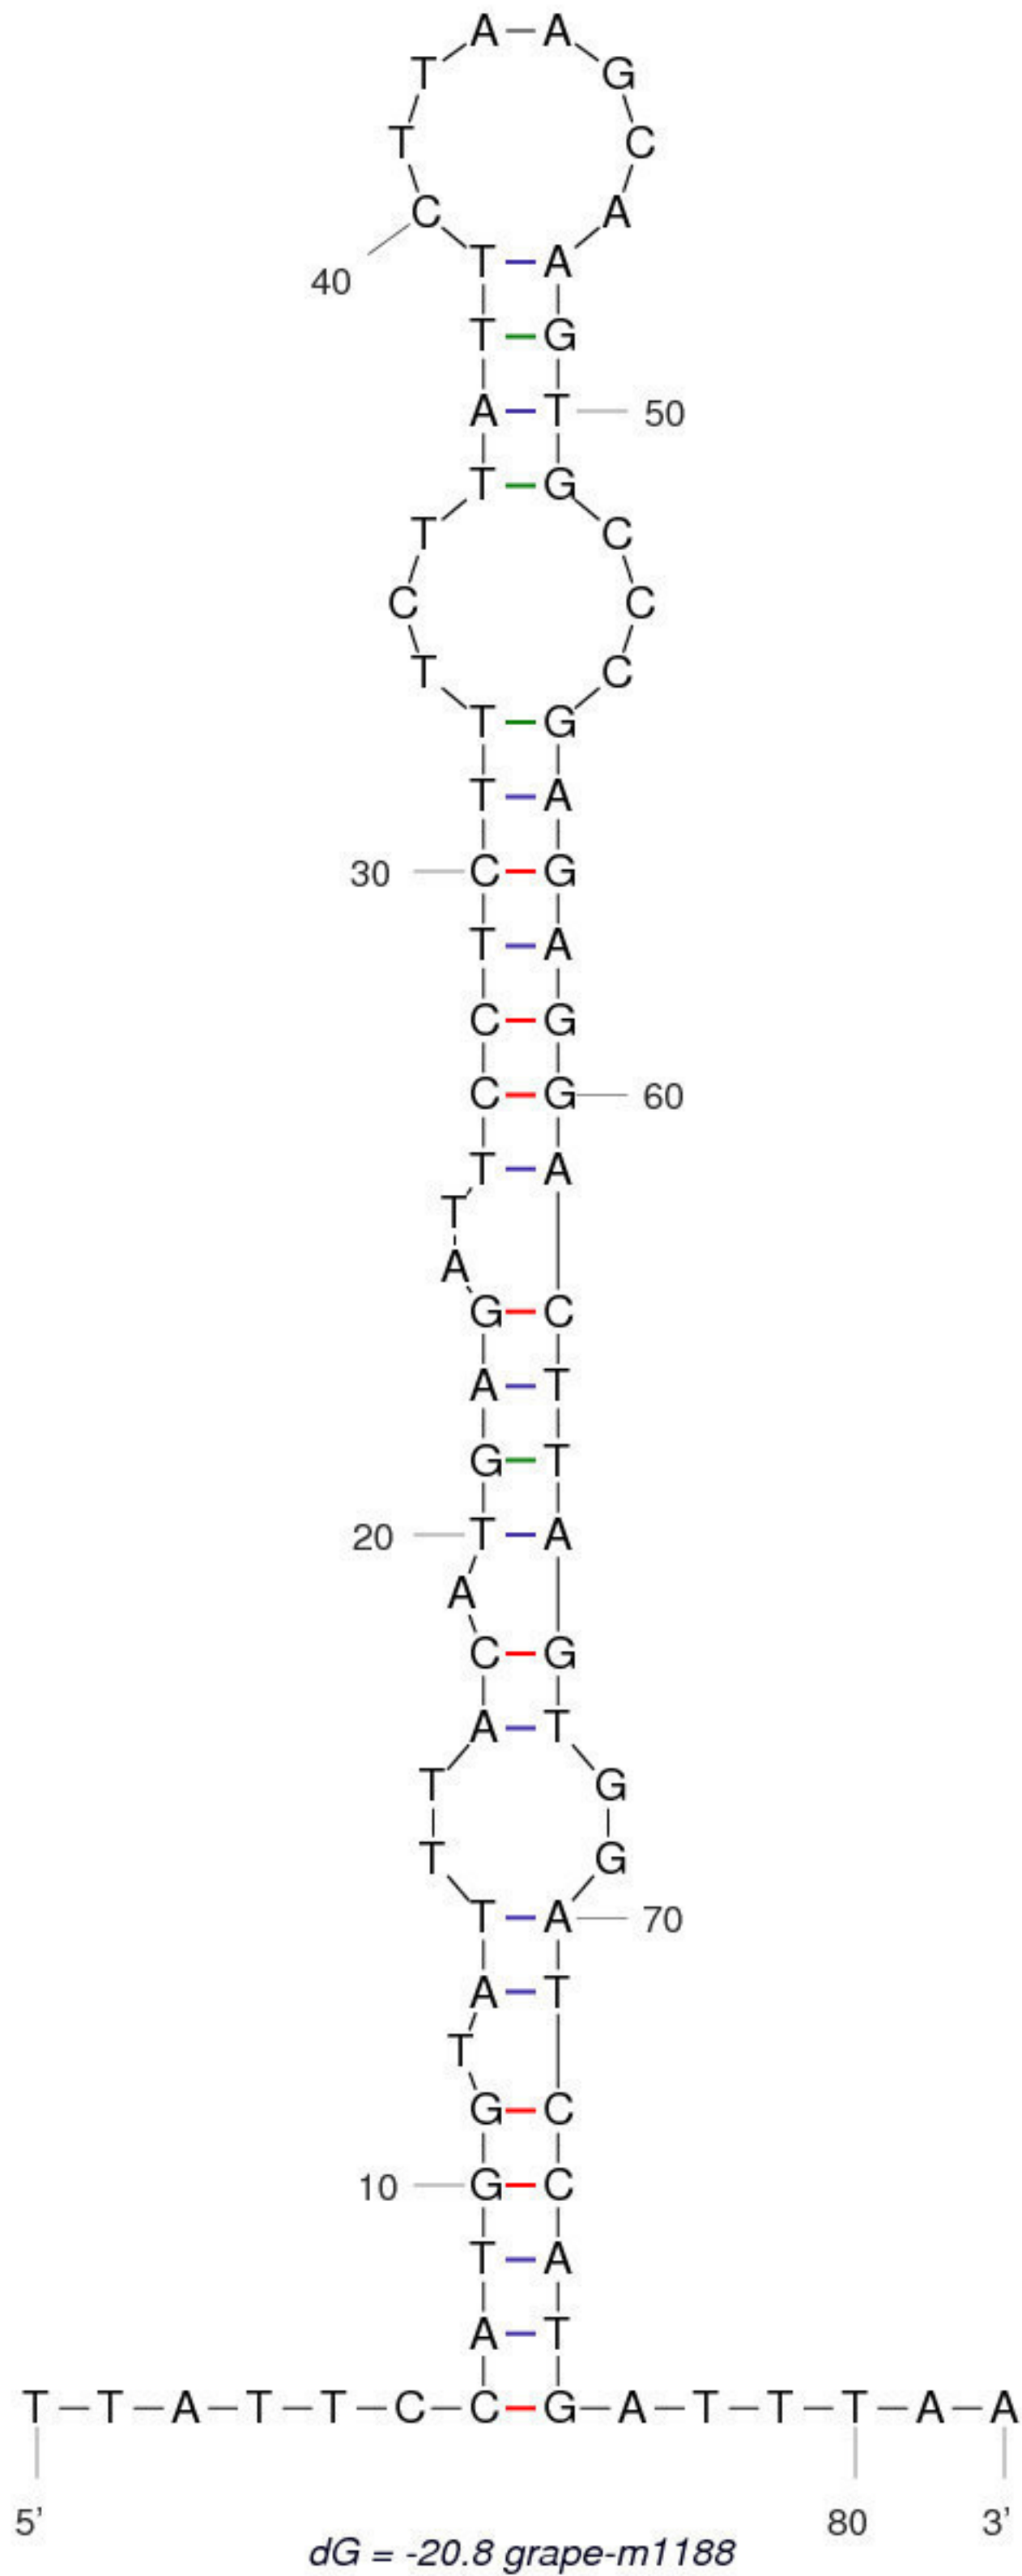

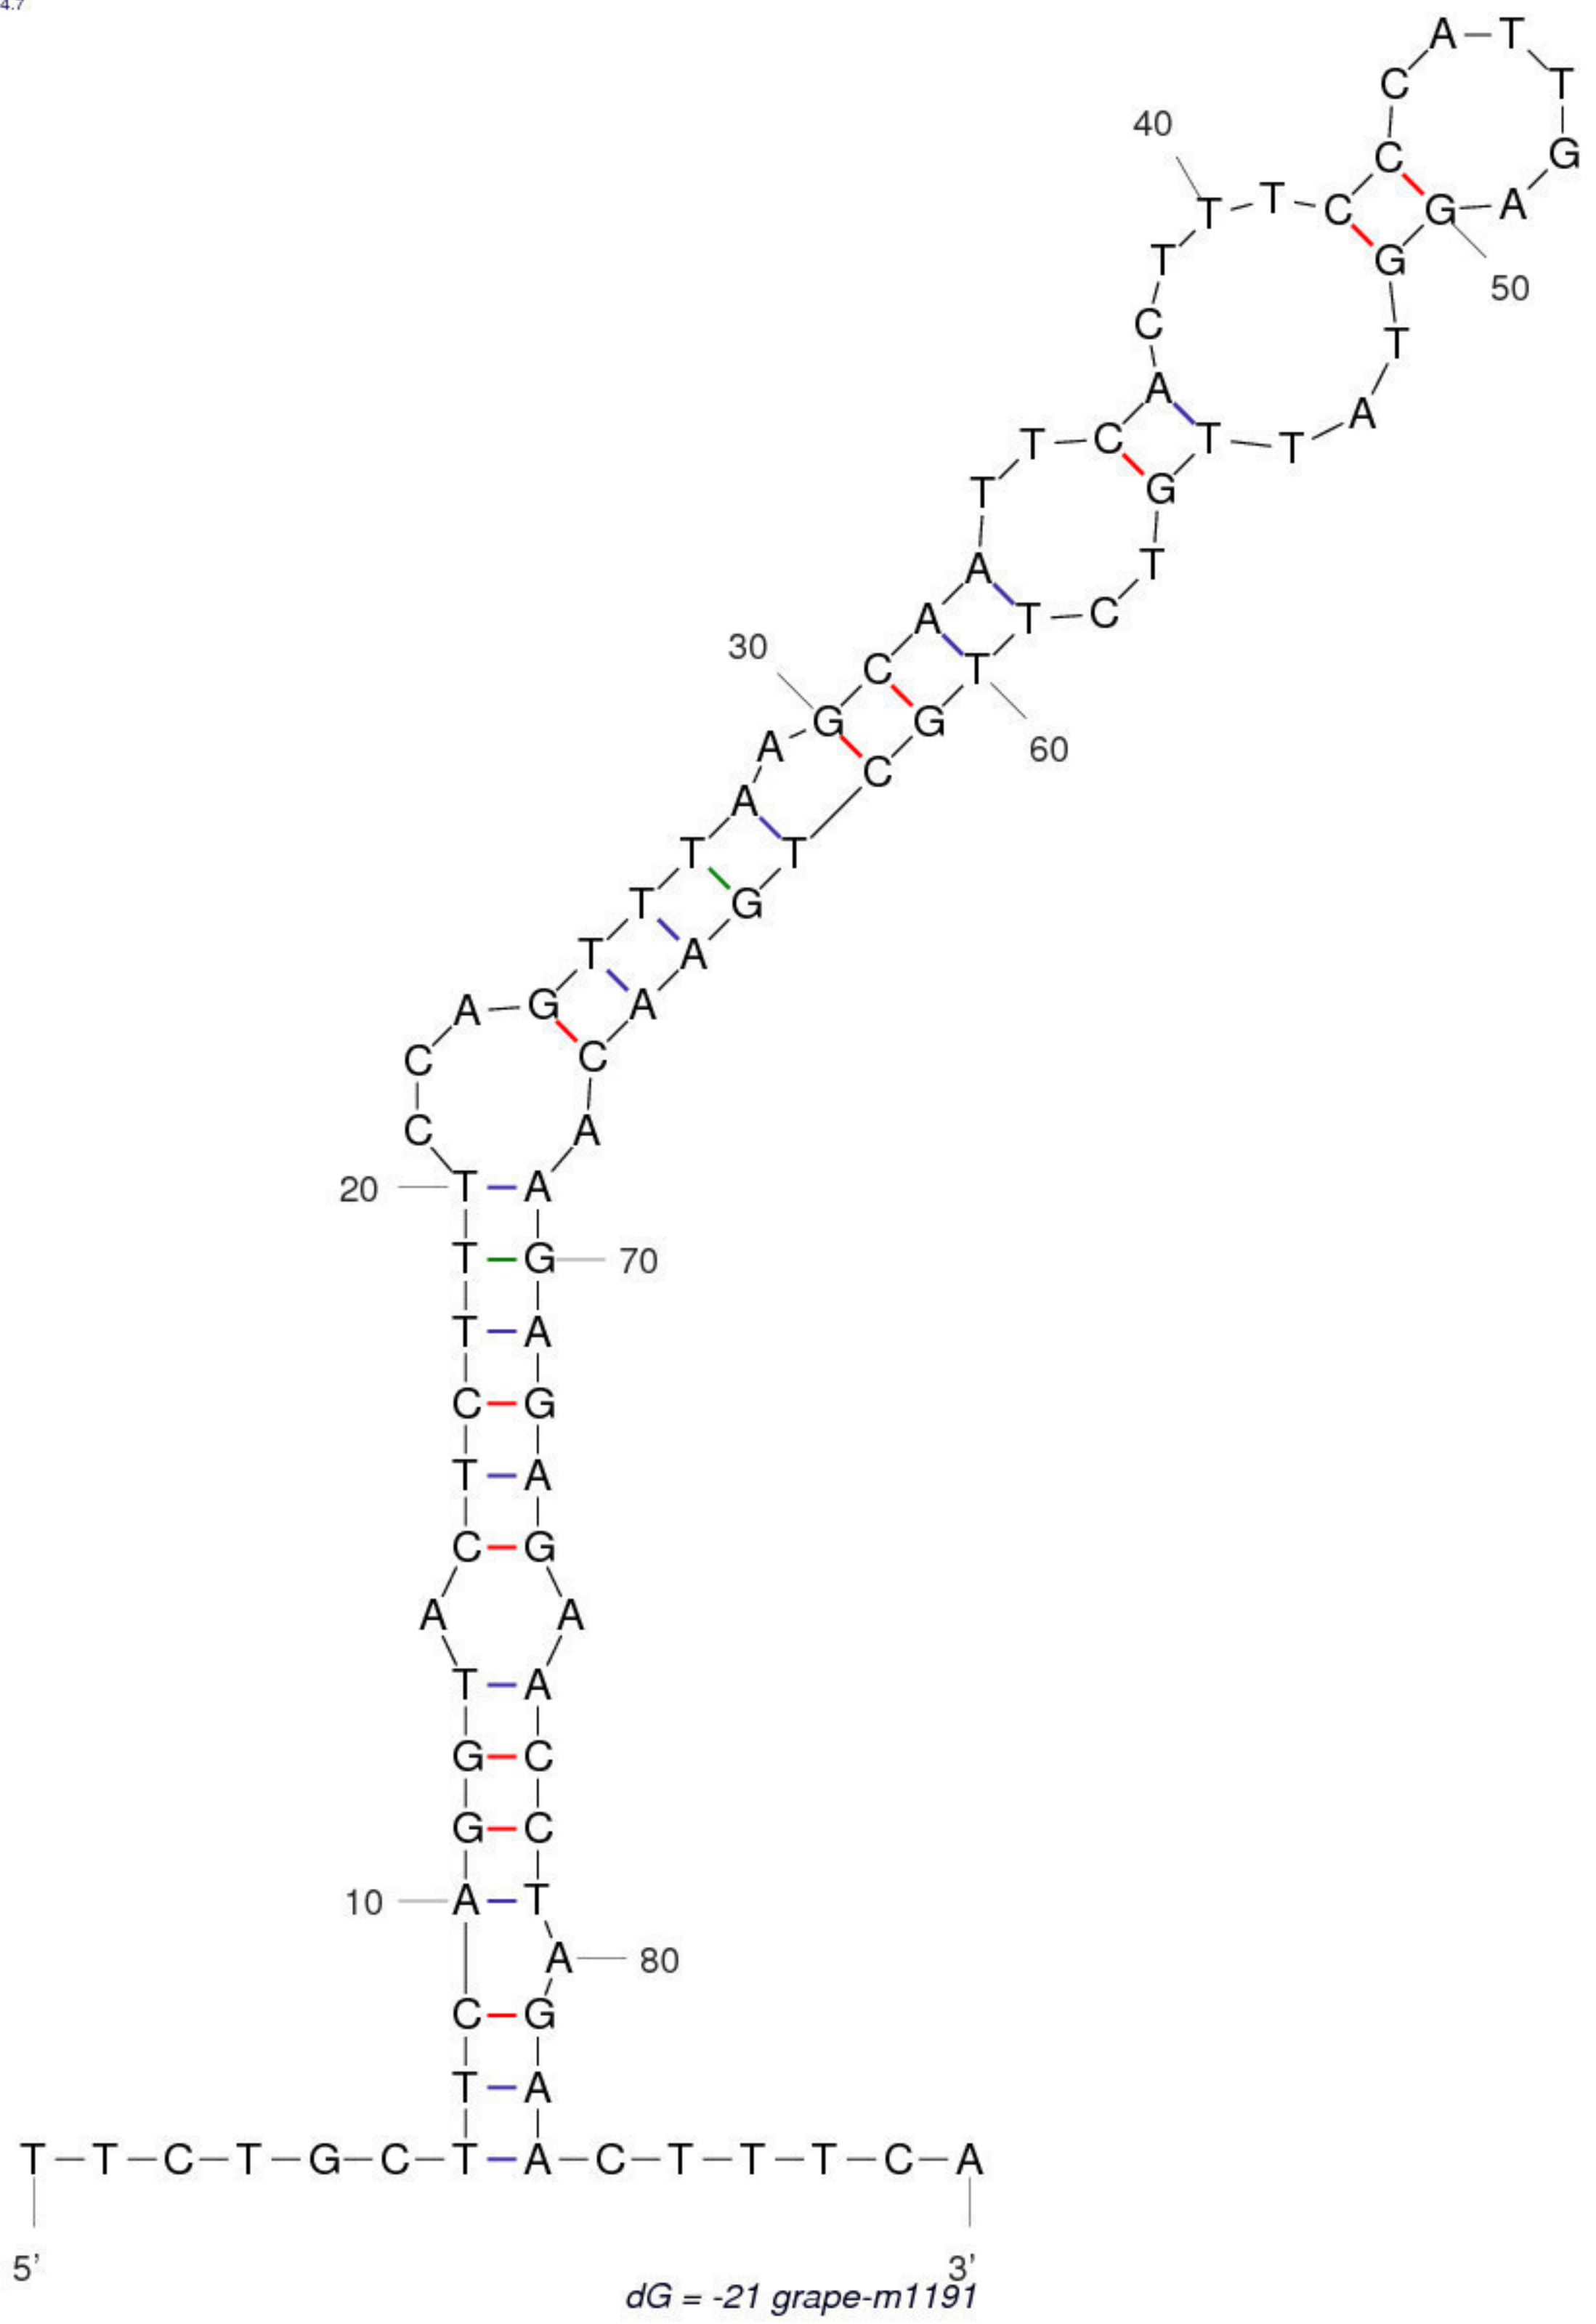

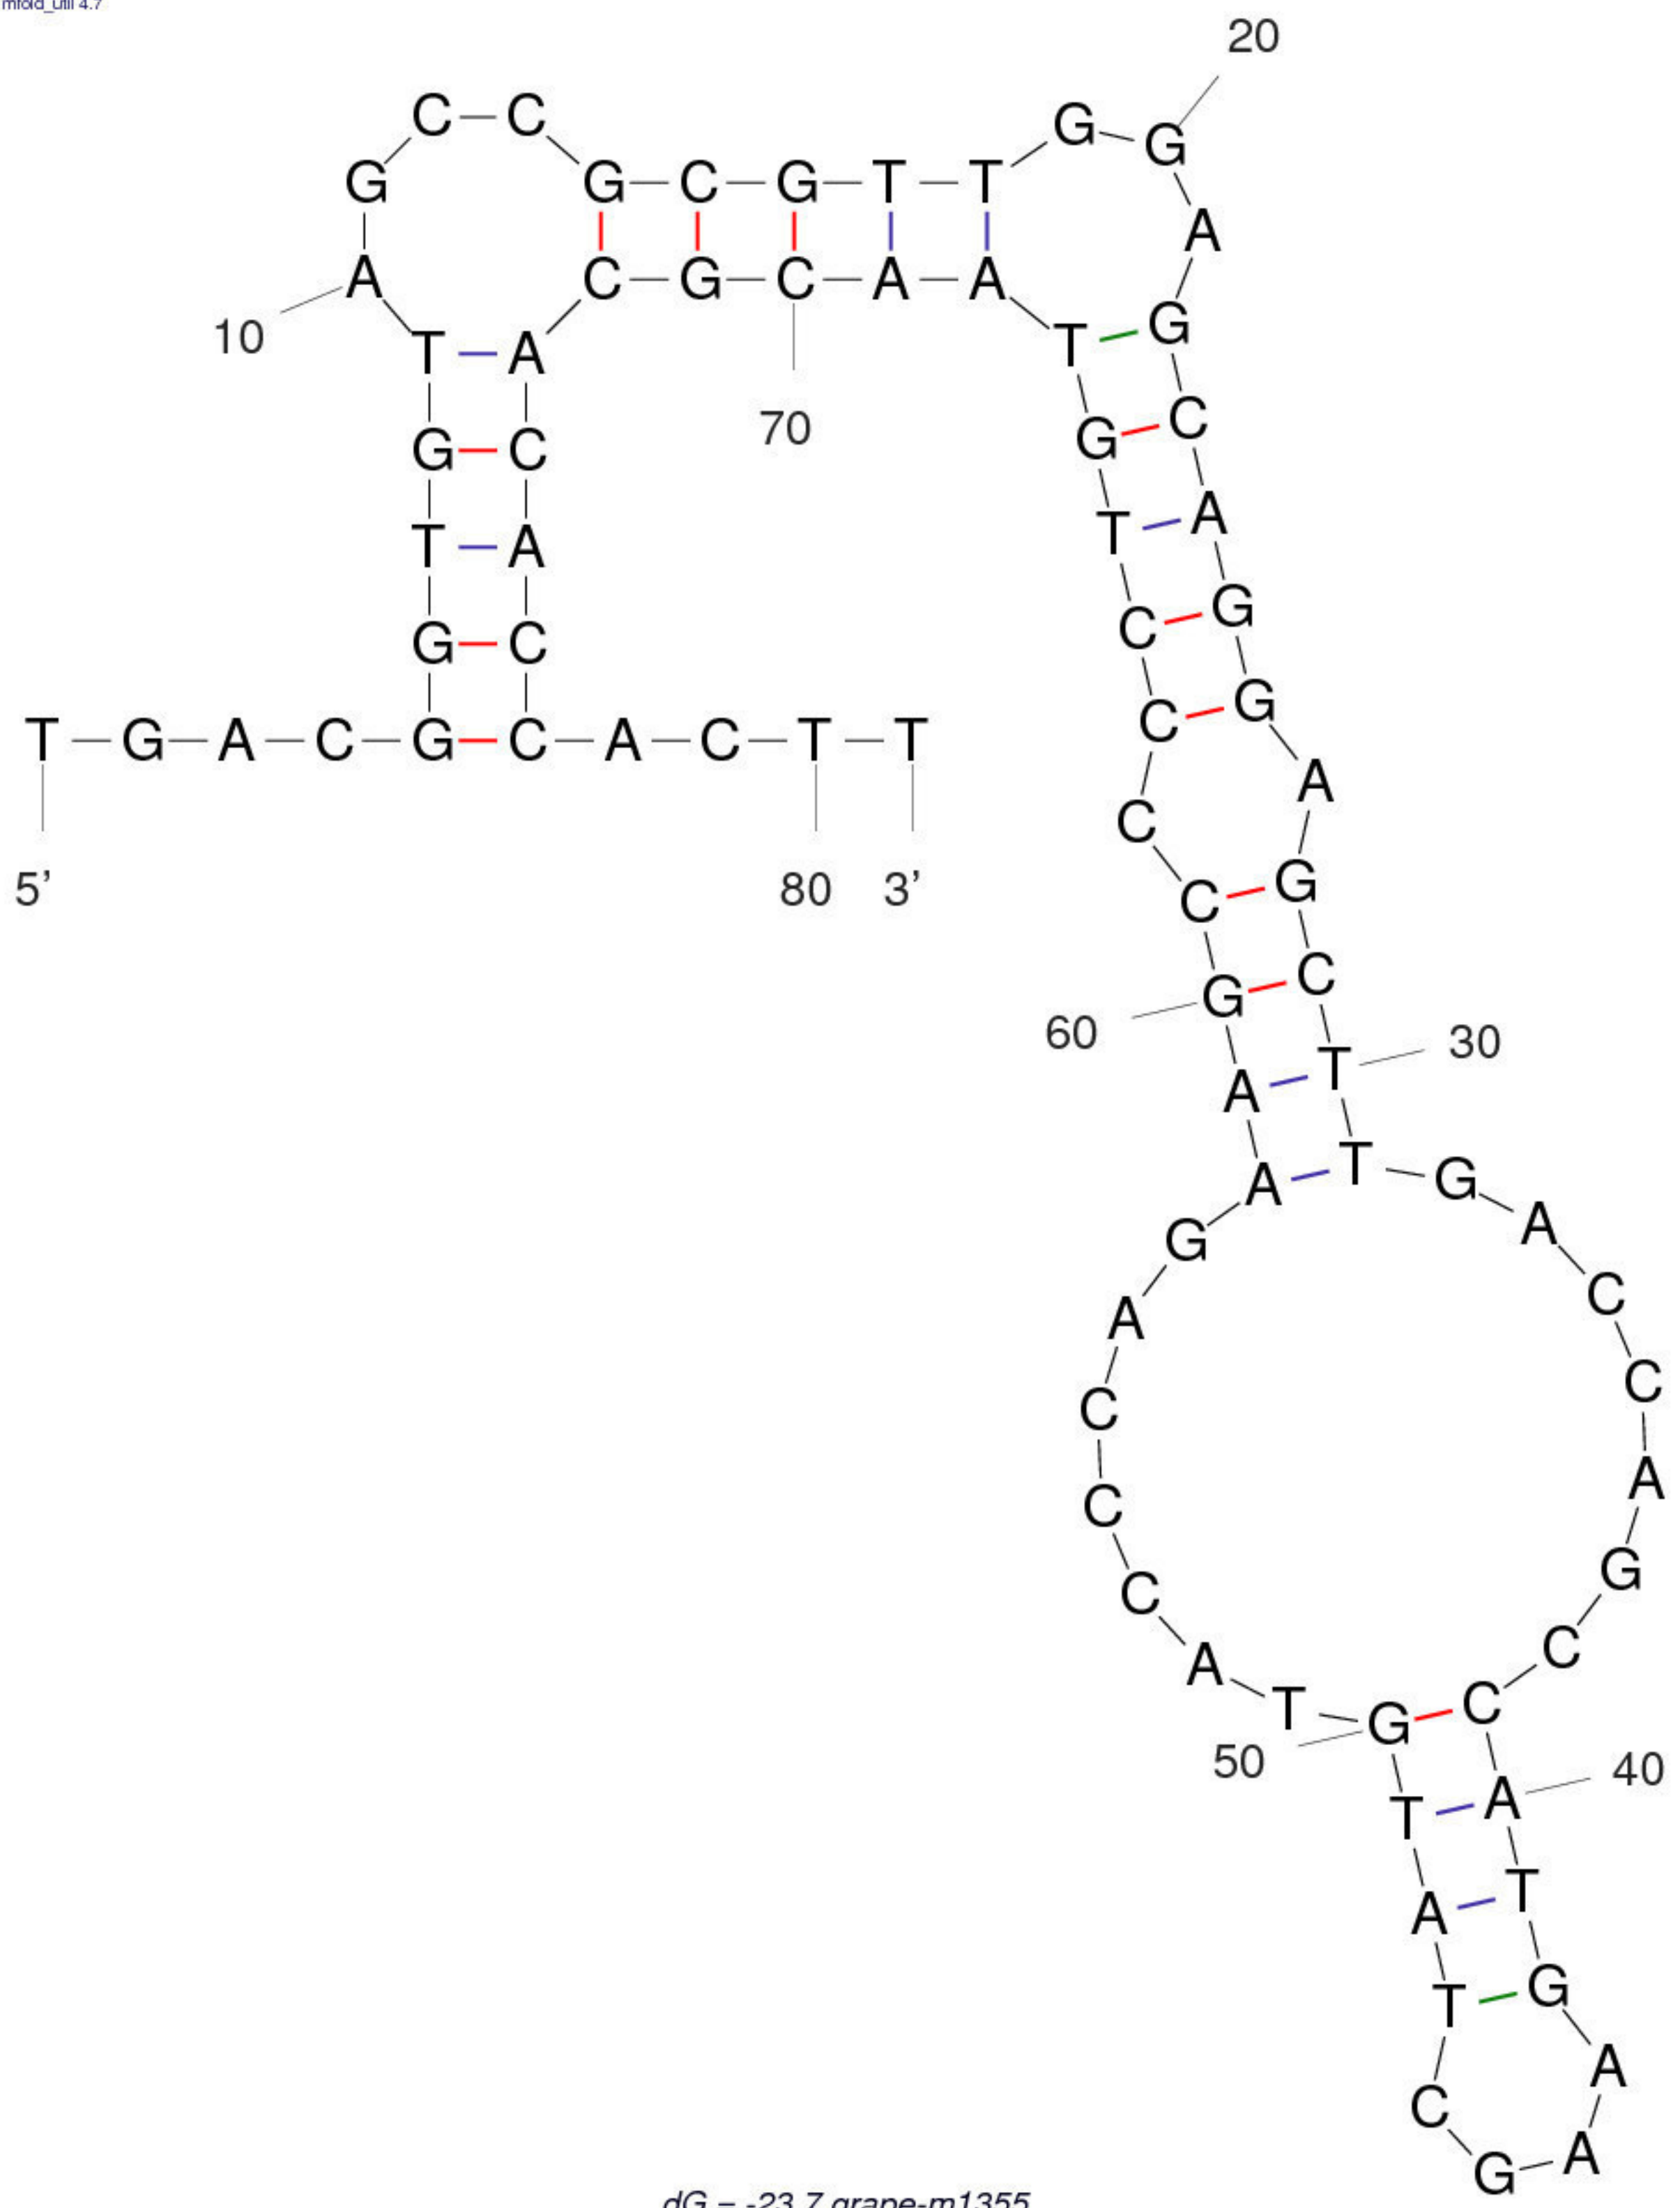

dG = -23.7 grape-m1355

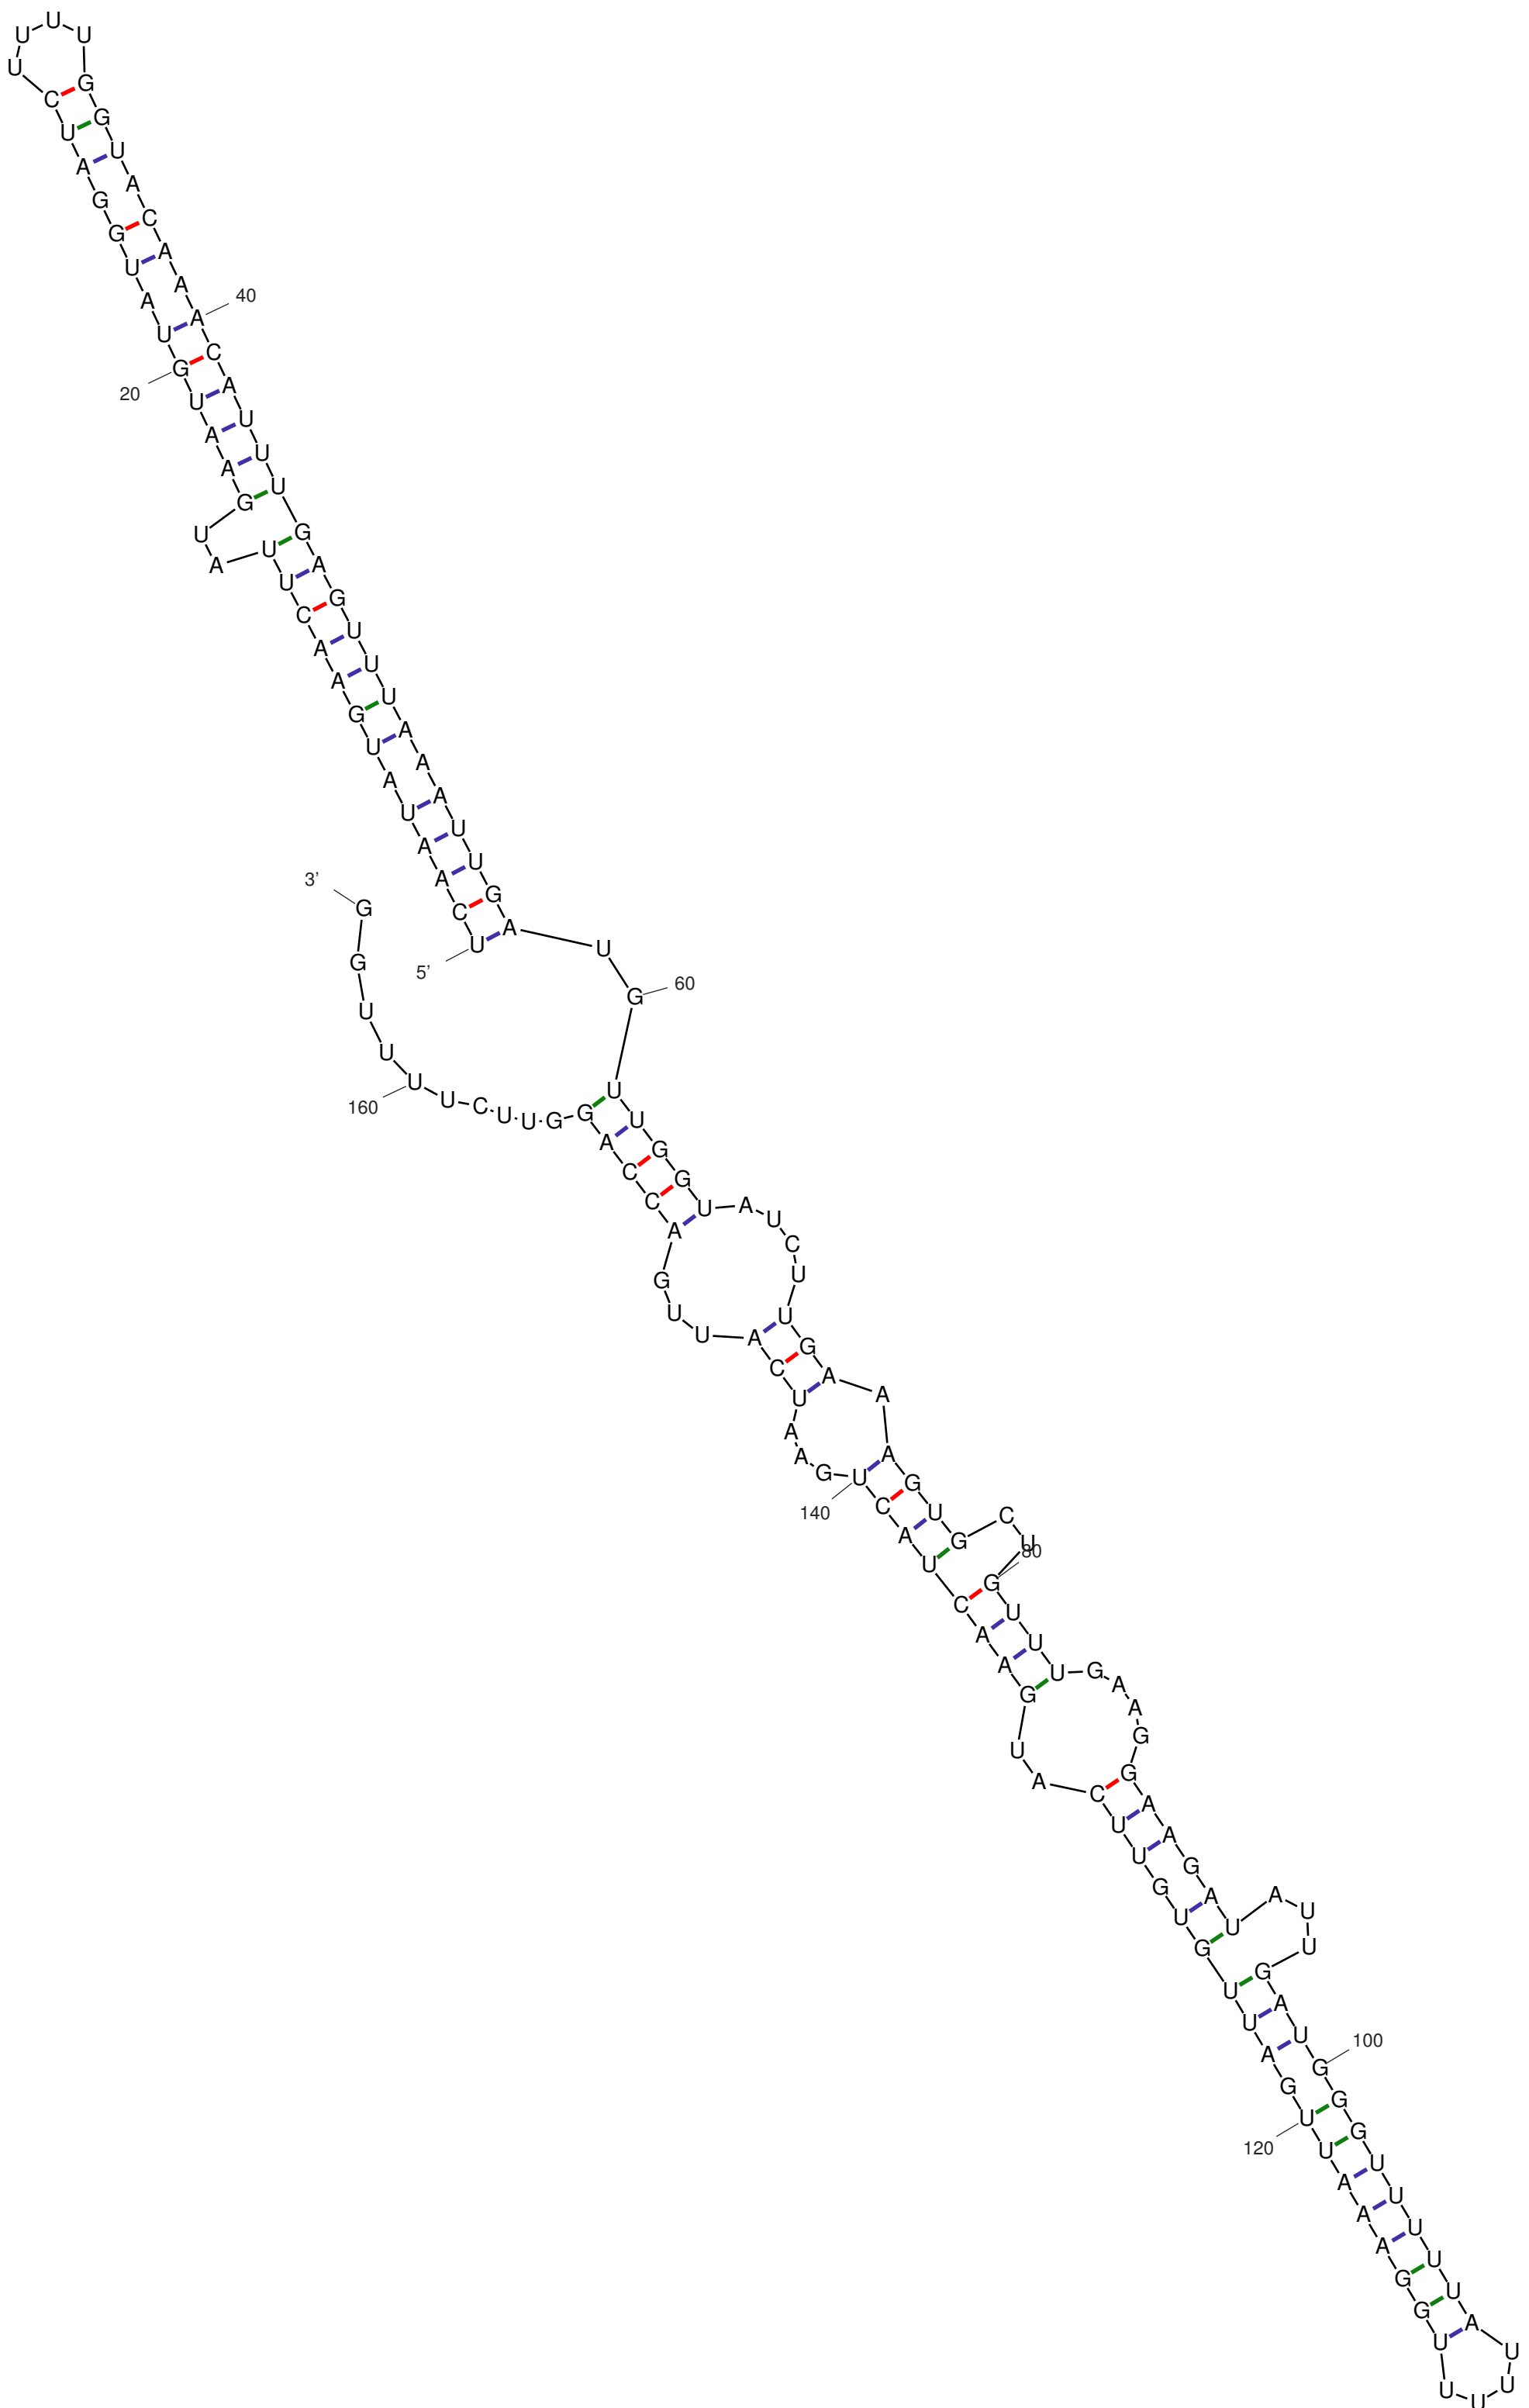

$dG = -32.40$  [Initially -32.40] grape-m1517

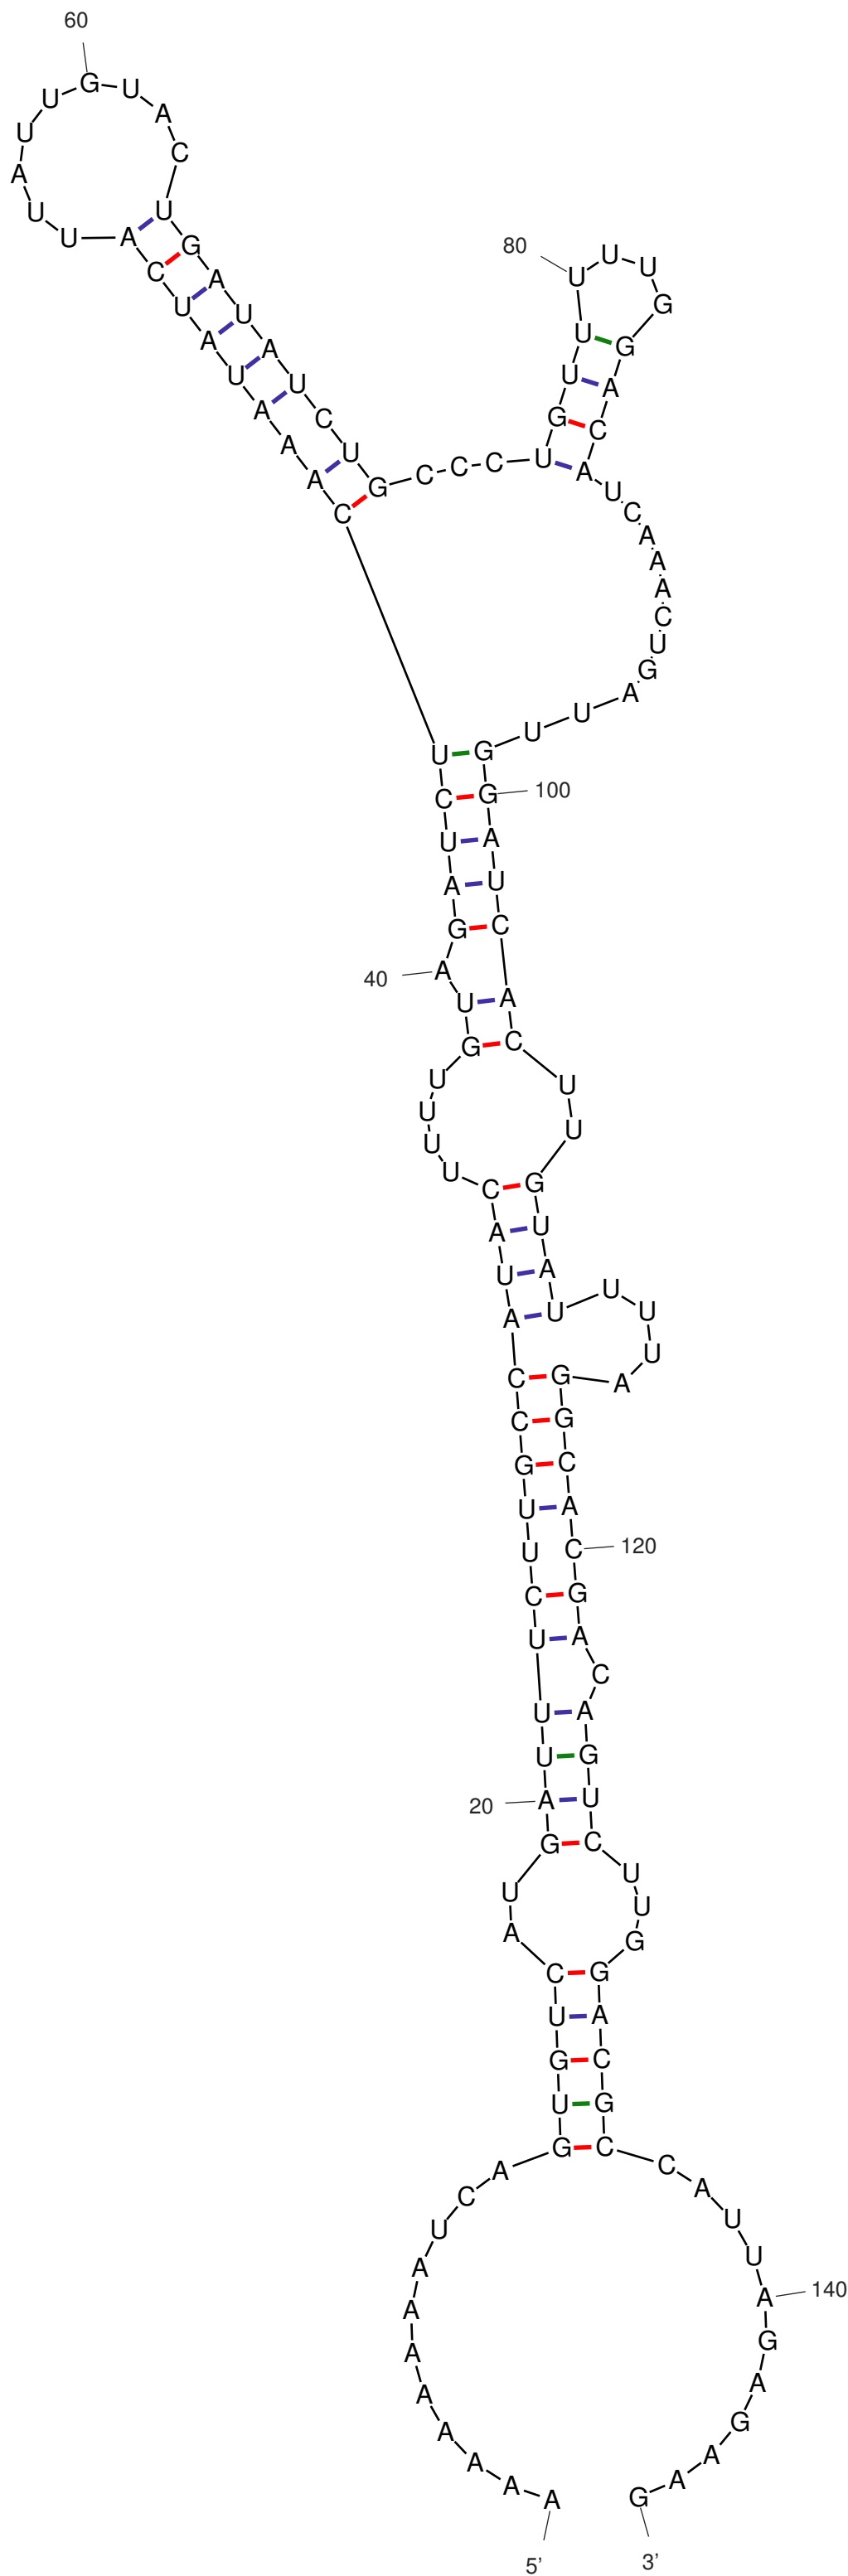

$dG = -24.37$  [Initially  $-26.60$ ] grape-m1577

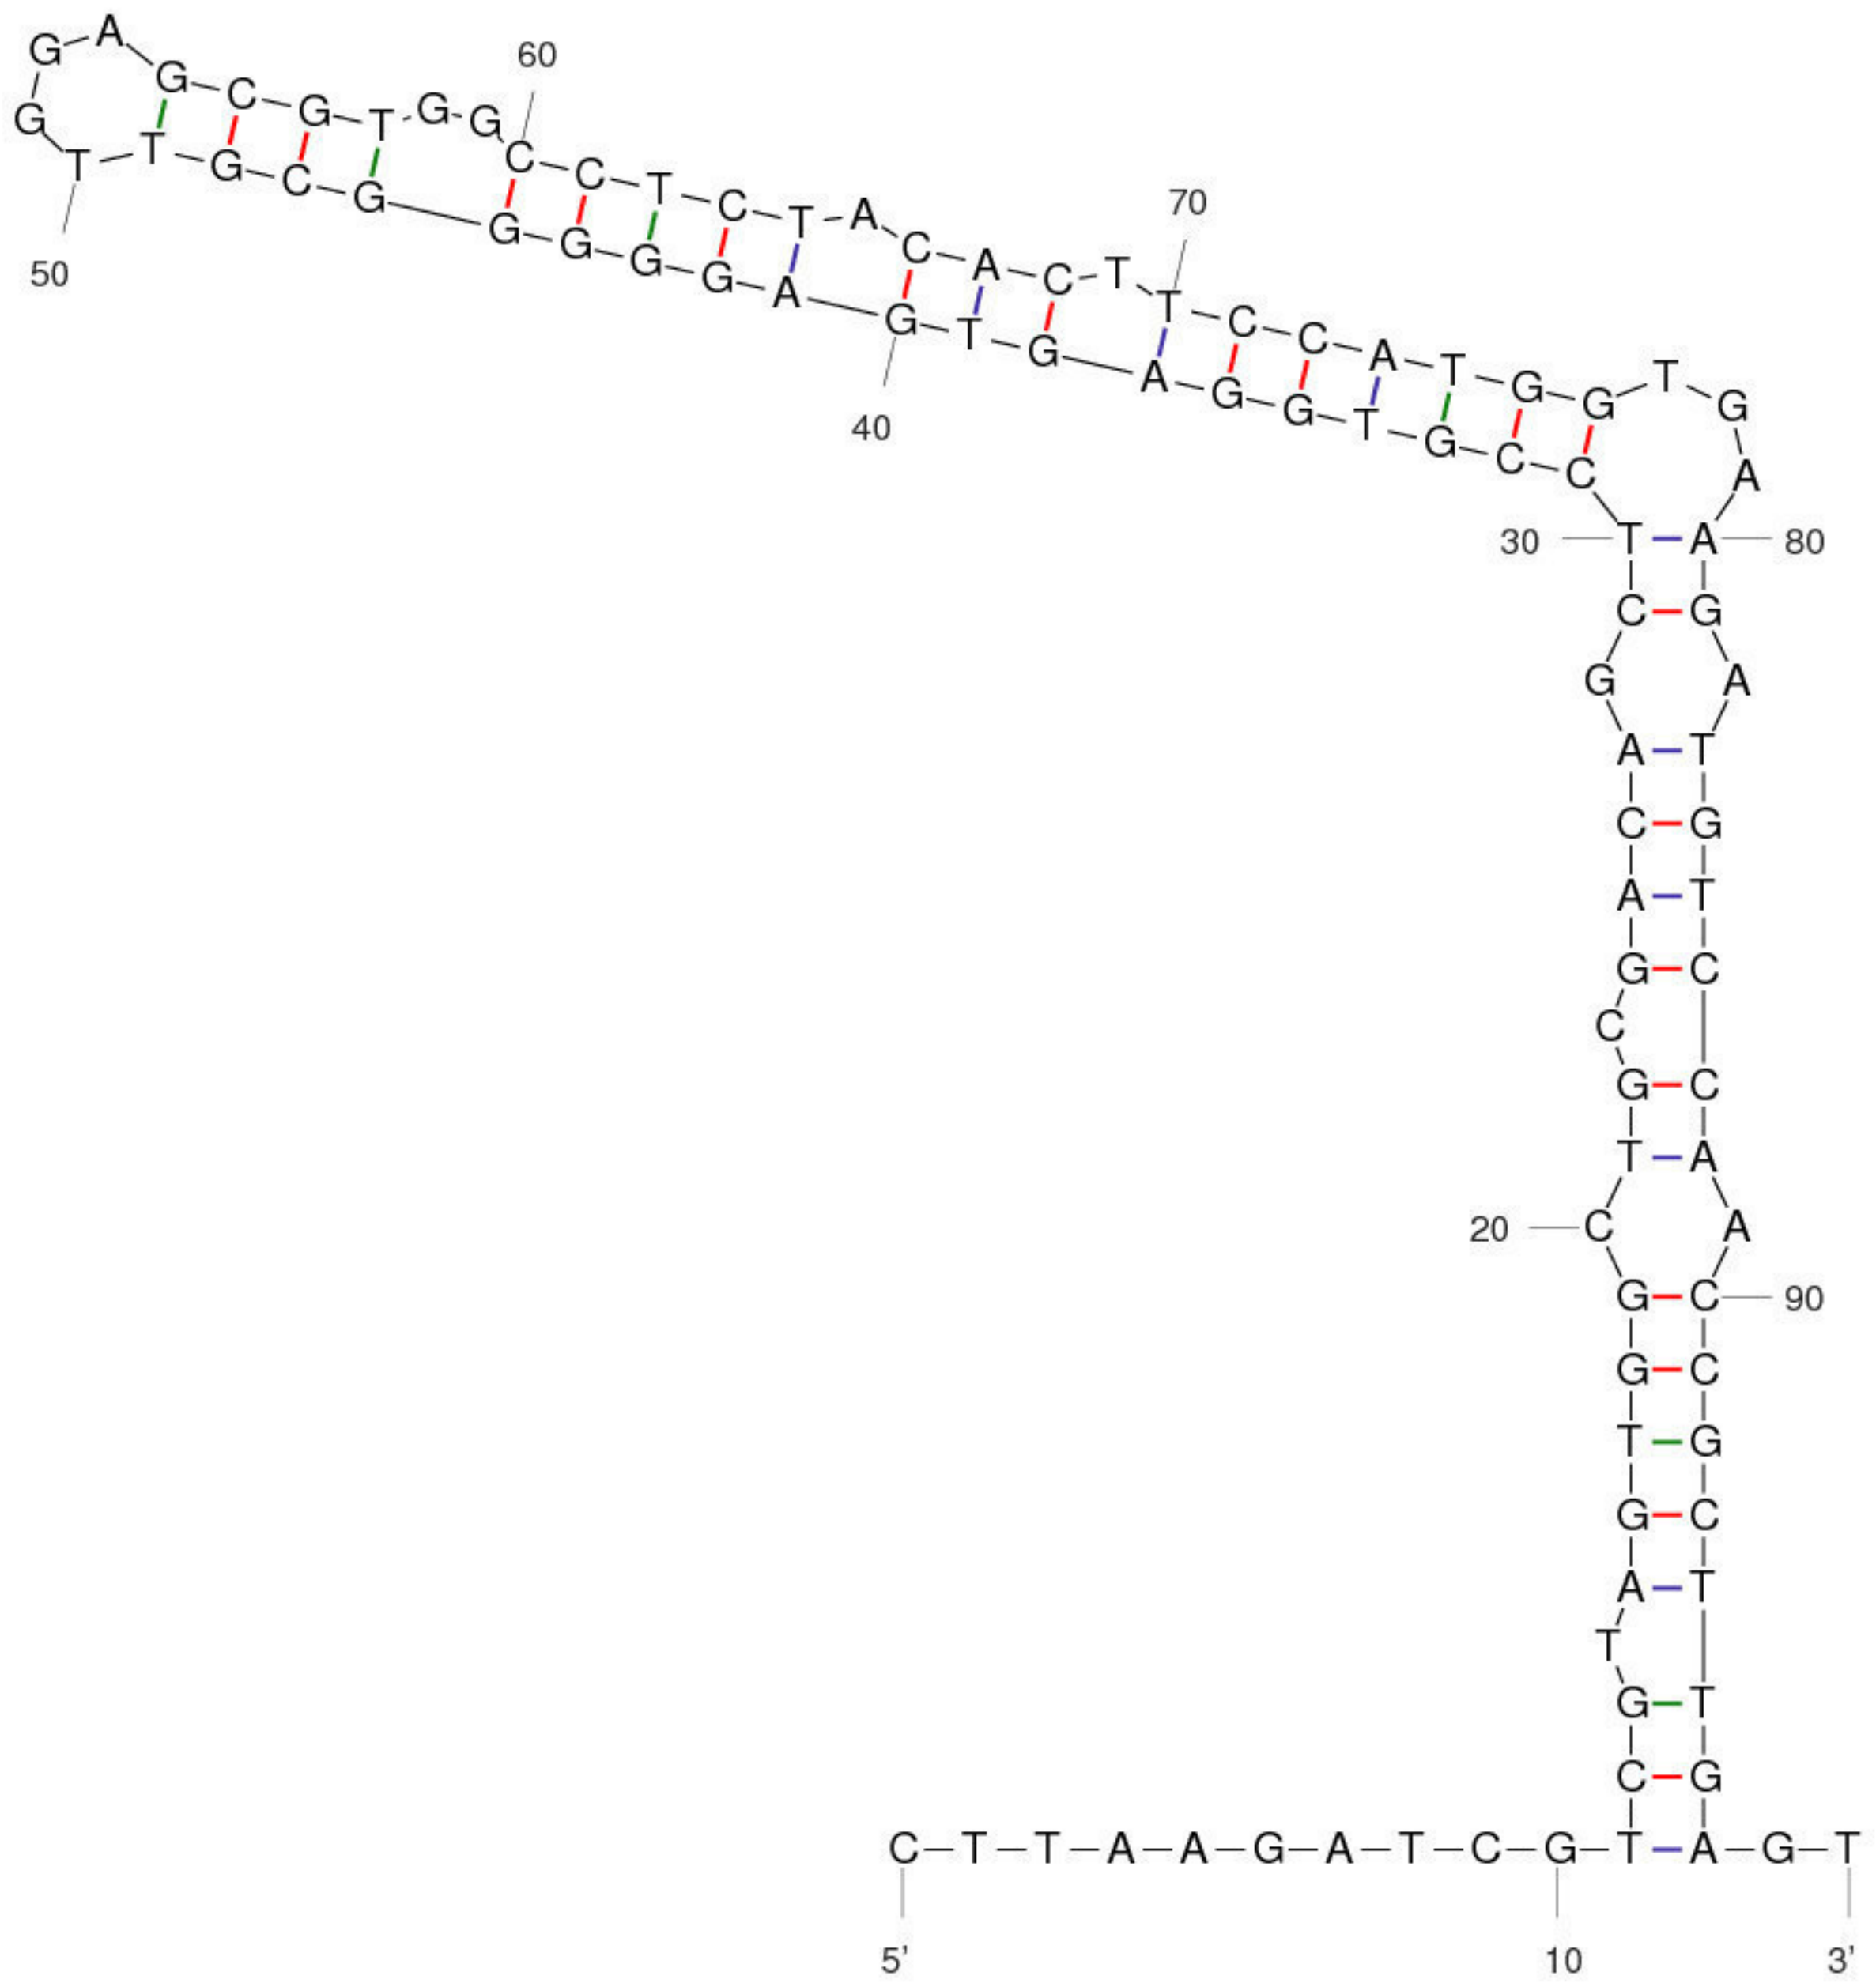

$dG = -38.6$  grape-m1738

**Supplementary Figure 3: miRNA secondary structures of all (known and novel) *Vitis vinifera* miRNAs identified in Cabernet Sauvignon and Sangiovese derived small RNA libraries.**

Structures have been produced using the Mfold web server (Zuker, 2003), with default settings. For each miRNA, free energy (dG) is given. Mature miRNA sequence for each precursor can be retrieved in table 2 and 3 (main text).



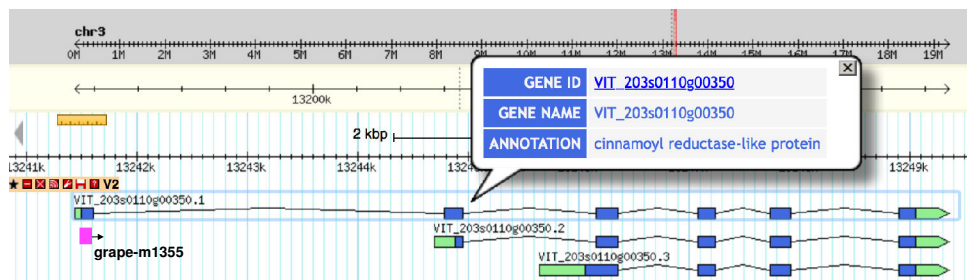

**Supplementary Figure 4: Representation of the genomic region where the novel miRNA candidate grape-m1355 maps together with its target (VIT\_203s0110g00350.1), and other 2 isoforms of the same target gene.**

## 1.1 Supplementary Tables

**Supplementary Table 1. Summary statistics of small RNA libraries. Sequencing was done as a pool of 6 libraries using barcode indexes.**

| Library <sup>a</sup> | Total raw reads | Total trimmed and chopped reads <sup>b</sup> | Genome matched reads <sup>c</sup> | Distinct genome matched reads <sup>d</sup> | Norm. Base Value |
|----------------------|-----------------|----------------------------------------------|-----------------------------------|--------------------------------------------|------------------|
| Mont_CS_ps_1         | 9,043,902       | 6,003,656                                    | 3,079,454                         | 697,685                                    | 4M               |
| Mont_CS_ps_2         | 9,237,934       | 2,275,836                                    | 1,310,311                         | 118,529                                    | 4M               |
| Mont_CS_bc_1         | 7,039,403       | 4,005,087                                    | 1,945,523                         | 250,602                                    | 4M               |
| Mont_CS_bc_2         | 10,416,121      | 3,245,406                                    | 1,517,101                         | 296,213                                    | 4M               |
| Mont_CS_19_1         | 12,627,603      | 4,816,749                                    | 1,932,814                         | 197,822                                    | 4M               |
| Mont_CS_19_2         | 11,650,542      | 6,832,315                                    | 3,302,841                         | 412,701                                    | 4M               |
| Mont_CS_hv_1         | 15,850,494      | 9,261,043                                    | 4,409,822                         | 358,703                                    | 4M               |
| Mont_CS_hv_2         | 23,644,910      | 4,931,988                                    | 2,104,335                         | 138,400                                    | 4M               |
| Mont_SG_ps_1         | 14,142,412      | 9,920,021                                    | 4,730,024                         | 681,265                                    | 4M               |
| Mont_SG_ps_2         | 10,608,981      | 2,153,646                                    | 929,012                           | 180,467                                    | 4M               |
| Mont_SG_bc_1         | 5,853,000       | 2,366,249                                    | 1,243,075                         | 115,569                                    | 4M               |
| Mont_SG_bc_2         | 13,129,001      | 2,316,461                                    | 967,698                           | 121,284                                    | 4M               |
| Mont_SG_19_1         | 5,378,668       | 3,952,750                                    | 2,021,593                         | 241,825                                    | 4M               |
| Mont_SG_19_2         | 5,200,023       | 2,710,081                                    | 984,885                           | 168,108                                    | 4M               |
| Mont_SG_hv_1         | 4,188,242       | 1,429,022                                    | 653,748                           | 73,128                                     | 4M               |
| Mont_SG_hv_2         | 21,488,514      | 15,977,470                                   | 8,134,871                         | 598,594                                    | 4M               |
| Bol_CS_ps_1          | 20,596,628      | 11,489,167                                   | 5,888,470                         | 439,038                                    | 4M               |
| Bol_CS_ps_2          | 15,345,813      | 12,419,568                                   | 6,468,871                         | 1,137,809                                  | 4M               |

## Supplementary Material

|              |             |             |             |            |    |
|--------------|-------------|-------------|-------------|------------|----|
| Bol_CS_bc_1  | 12,860,885  | 9,007,947   | 4,459,380   | 422,374    | 4M |
| Bol_CS_bc_2  | 10,062,432  | 8,245,210   | 4,432,751   | 701,773    | 4M |
| Bol_CS_19_1  | 22,379,483  | 11,433,286  | 5,424,968   | 235,174    | 4M |
| Bol_CS_19_2  | 8,792,693   | 5,766,958   | 2,846,597   | 302,798    | 4M |
| Bol_CS_hv_1  | 19,231,501  | 11,063,113  | 5,141,666   | 280,752    | 4M |
| Bol_CS_hv_2  | 11,383,442  | 6,650,487   | 3,115,091   | 336,957    | 4M |
| Bol_SG_ps_1  | 10,667,447  | 4,588,690   | 2,278,942   | 377,985    | 4M |
| Bol_SG_ps_2  | 12,708,803  | 7,962,286   | 3,358,152   | 827,881    | 4M |
| Bol_SG_bc_1  | 17,462,530  | 10,484,935  | 5,261,561   | 587,438    | 4M |
| Bol_SG_bc_2  | 35,741,881  | 11,126,627  | 7,140,324   | 118,071    | 4M |
| Bol_SG_19_1  | 16,493,965  | 7,234,994   | 3,399,949   | 225,402    | 4M |
| Bol_SG_19_2  | 14,478,682  | 3,703,632   | 1,705,007   | 157,304    | 4M |
| Bol_SG_hv_1  | 19,933,813  | 7,109,871   | 3,565,679   | 308,198    | 4M |
| Bol_SG_hv_2  | 5,167,853   | 3,303,106   | 1,535,631   | 177,651    | 4M |
| Ric_CS_ps_1  | 13,090,297  | 5,896,078   | 3,074,278   | 557,681    | 4M |
| Ric_CS_ps_2  | 10,427,663  | 8,392,862   | 3,860,244   | 864,982    | 4M |
| Ric_CS_bc_1  | 8,931,342   | 3,001,192   | 1,630,601   | 256,244    | 4M |
| Ric_CS_bc_2  | 5,641,015   | 2,191,257   | 970,282     | 116,796    | 4M |
| Ric_CS_19_1  | 11,922,030  | 6,153,194   | 2,836,288   | 346,934    | 4M |
| Ric_CS_19_2  | 61,937,671  | 48,403,939  | 21,444,997  | 1,151,918  | 4M |
| Ric_CS_hv_1  | 7,164,050   | 4,111,362   | 1,829,279   | 233,817    | 4M |
| Ric_CS_hv_2  | 45,663,782  | 32,514,347  | 14,723,974  | 974,003    | 4M |
| Ric_SG_ps_1  | 28,244,987  | 15,557,630  | 6,851,500   | 1,057,718  | 4M |
| Ric_SG_ps_2  | 35,201,415  | 30,300,328  | 13,707,899  | 1,351,894  | 4M |
| Ric_SG_bc_1  | 6,950,539   | 2,884,411   | 1,466,368   | 297,029    | 4M |
| Ric_SG_bc_2  | 13,822,016  | 9,139,817   | 4,521,724   | 551,155    | 4M |
| Ric_SG_19_1  | 13,464,075  | 4,448,747   | 2,127,072   | 348,519    | 4M |
| Ric_SG_19_2  | 13,540,517  | 10,662,287  | 4,763,877   | 492,888    | 4M |
| Ric_SG_hv_1  | 14,837,861  | 3,916,688   | 2,180,762   | 164,483    | 4M |
| Ric_SG_hv_2  | 28,373,334  | 14,549,095  | 8,673,659   | 265,147    | 4M |
| Summed Total | 752,020,195 | 415,910,891 | 199,952,950 | 20,318,708 |    |

<sup>a</sup>The description of small RNA libraries code are shown in Table 1.

<sup>b</sup>total sequences from 18 to 34 nt after trimming the adaptors

<sup>c</sup> Total number of sequences ranging from 18 to 34 nt which perfectly matched to the Grapevine genomic sequence, excluding sequences matched to structural RNAs (t/r/sn/snoRNAs) (GRAPE\_IGGP12Xv1).

<sup>d</sup> Number of genome-matched sequences which are uniquely found within the set, excluding sequences matched to structural RNAs (t/r/sn/snoRNAs).

**Supplementary Table 2. Pearson correlation coefficients between library replicates using ad hoc transformed data.**

| Library    | Pearson coefficient |
|------------|---------------------|
| Mont_CS_ps | 0.854125568         |
| Mont_CS_bc | 0.9548837           |
| Mont_CS_19 | 0.970957113         |
| Mont_CS_hv | 0.957031701         |
| Mont_SG_ps | 0.910242175         |
| Mont_SG_bc | 0.869691871         |
| Mont_SG_19 | 0.88316824          |
| Mont_SG_hv | 0.929993472         |
| Bol_CS_ps  | 0.960997846         |
| Bol_CS_bc  | 0.956185352         |
| Bol_CS_19  | 0.96055899          |
| Bol_CS_hv  | 0.931599739         |
| Bol_SG_ps  | 0.940108049         |
| Bol_SG_bc  | 0.79060224          |
| Bol_SG_19  | 0.918562473         |
| Bol_SG_hv  | 0.970880884         |
| Ric_CS_ps  | 0.961428872         |
| Ric_CS_bc  | 0.923738401         |
| Ric_CS_19  | 0.967545547         |
| Ric_CS_hv  | 0.969727901         |
| Ric_SG_ps  | 0.962939701         |
| Ric_SG_bc  | 0.954586248         |
| Ric_SG_19  | 0.946924113         |
| Ric_SG_hv  | 0.970507578         |
| Average    | 0.934041157         |

**Supplementary Table 3. List of putative targets of known and novel vvi-miRNAs identified using the module *miRferno* of sPARTA software. Only targets with score  $\leq 2.5$  are listed.**

| miRNA name     | Target gene        | Number of target sites | miRNA sequence        | Target sequence        | Score | Target annotation                                                                        |
|----------------|--------------------|------------------------|-----------------------|------------------------|-------|------------------------------------------------------------------------------------------|
| grape-m0642-5p | VIT_200s0291g00090 | 1                      | GAGAACGACUAGAUAGUGGAG | CUCUUUCUGAUCUAUCACCGC  | 2     | cyclin-related protein hydrolase activity                                                |
| grape-m1188-3p | VIT_200s0173g00170 | 1                      | CUAGGUGAUUCAGGAGAGCCC | GAUCCACUAAGUCCUCUCGGG  | 0     | ribosomal protein s7 structural constituent of ribosome                                  |
| grape-m1188-3p | VIT_202s0012g03140 | 1                      | CUAGGUGAUUCAGGAGAGCCC | GAUCCACUAAGUCCUCUCGGG  | 0     | hypothetical protein                                                                     |
| grape-m1191-3p | VIT_205s0029g00750 | 3                      | UCCAAGAGAGAACAAGUCGUU | CGGUUCUCUCUUGUUUAACAA  | 2.5   | tmv resistance protein n-like defense response                                           |
| grape-m1191-3p | VIT_205s0029g00880 | 1                      | UCCAAGAGAGAACAAGUCGUU | CGGUUCUCUCUUGUUUAACAA  | 2.5   | tmv resistance protein n-like defense response                                           |
| grape-m1191-3p | VIT_212s0028g01160 | 1                      | UCCAAGAGAGAACAAGUCGUU | GGGUCCUCUCUGGUUCAGCAA  | 2.5   | TT12 - transparent testa dd                                                              |
| grape-m1191-3p | VIT_212s0034g00910 | 1                      | UCCAAGAGAGAACAAGUCGUU | AGGUUCUCUCUUAUUAACAA   | 2     | tmv resistance protein n-like defense response                                           |
| grape-m1191-3p | VIT_212s0057g01100 | 3                      | UCCAAGAGAGAACAAGUCGUU | AGGUUCUCGCUUGUUCAGCAA  | 1     | nudix hydrolase 2-like protein poly-ADP-ribosylation                                     |
| grape-m1191-3p | VIT_214s0068g00210 | 1                      | UCCAAGAGAGAACAAGUCGUU | AGGUUCUCUGUUGUUCAGCCA  | 2     | abc transporter family protein plant-type vacuole                                        |
| grape-m1355-5p | VIT_203s0110g00350 | 1                      | UUCGAGGACGAGGUUGCGCCG | AAGCUCCUGCUCCAACGCGGC  | 0     | cinnamoyl reductase-like protein                                                         |
| grape-m1355-5p | VIT_206s0004g02380 | 1                      | UUCGAGGACGAGGUUGCGCCG | AAGCUUCUUCUCCAACGUGGU  | 2.5   | cinnamyl alcohol dehydrogenase coenzyme binding                                          |
| grape-m1355-5p | VIT_213s0047g00540 | 1                      | UUCGAGGACGAGGUUGCGCCG | AAGCUCCUUCUCCAACGCGGC  | 1     | bifunctional dihydroflavonol 4-reductase flavanone 4-reductase-like                      |
| grape-m1355-5p | VIT_213s0047g00550 | 1                      | UUCGAGGACGAGGUUGCGCCG | AAGCUCCUGCUCCAACACCGU  | 2.5   | bifunctional dihydroflavonol 4-reductase flavanone 4-reductase-like nucleic acid binding |
| grape-m1355-5p | VIT_213s0047g00700 | 1                      | UUCGAGGACGAGGUUGCGCCG | AAGCUCCUGCUCCAACGCGGC  | 0.5   | bifunctional dihydroflavonol 4-reductase flavanone 4-reductase-like steroid              |
| grape-m1355-5p | VIT_213s0047g00940 | 1                      | UUCGAGGACGAGGUUGCGCCG | AAGCUCCUGCUCCAACGCGGC  | 0     | bifunctional dihydroflavonol 4-reductase flavanone 4-reductase-like nucleic acid binding |
| grape-m1355-5p | VIT_213s0047g00990 | 1                      | UUCGAGGACGAGGUUGCGCCG | AAGCUUCUUGCUCCAACGCGGC | 0.5   | bifunctional dihydroflavonol 4-reductase flavanone 4-reductase-like coenzyme binding     |
| grape-m1355-5p | VIT_213s0064g00290 | 1                      | UUCGAGGACGAGGUUGCGCCG | AAGCUCCUGCUCCAACGCGGC  | 0     | bifunctional dihydroflavonol 4-reductase flavanone 4-reductase-like nucleic acid binding |
| grape-m1355-5p | VIT_213s0064g00340 | 1                      | UUCGAGGACGAGGUUGCGCCG | AAGCUCCUGCUCCAACGUGGC  | 0.5   | phenylacetaldehyde reductase                                                             |
| grape-m1355-5p | VIT_213s0067g00460 | 1                      | UUCGAGGACGAGGUUGCGCCG | AAGCUCCUGCUCCAACGUGGU  | 1     | bifunctional dihydroflavonol 4-reductase flavanone 4-reductase-like nucleic acid binding |
| grape-m1355-5p | VIT_213s0067g00530 | 1                      | UUCGAGGACGAGGUUGCGCCG | AAGCUCCUGCUCCAACGUGGU  | 1     | bifunctional dihydroflavonol 4-reductase flavanone 4-reductase-like nucleic acid binding |

| miRNA name      | Target gene        | Number of target sites | miRNA sequence         | Target sequence        | Score | Target annotation                                                                          |
|-----------------|--------------------|------------------------|------------------------|------------------------|-------|--------------------------------------------------------------------------------------------|
| grape-m1355-5p  | VIT_213s0101g00250 | 1                      | UUCGAGGACGAGGUUGCGCCG  | AAGCUCCUGCUCCAACACCGU  | 2.5   | bifunctional dihydroflavonol 4-reductase flavanone 4-reductase-like para-aminobenzoic acid |
| grape-m1517-3p  | VIT_203s0063g02020 | 2                      | GACCAGUUACUAAGUCAUCAAA | CUGGGCAAUGCUUCAGUGGUU  | 2.5   | tic62 protein                                                                              |
| grape-m1517-3p  | VIT_219s0090g01770 | 1                      | GACCAGUUACUAAGUCAUCAAA | CUGGUGAGUGAUUUAGUGGUU  | 2.5   | hypothetical protein                                                                       |
| grape-m1738-5p  | VIT_208s0007g08500 | 1                      | CCUCGACAGCGUCGGUGAUGCU | GGAGCUGUCGACGCCACUACGA | 0     | 60s ribosomal export protein nmd3-like cytosol                                             |
| vvi-miRC169z-5p | VIT_200s0125g00290 | 1                      | UCCGUUCAGUAGGAACCGAU   | GGGUAAAGUUGUCCUUGGCUG  | 2.5   | protein regulation of meristem growth                                                      |
| vvi-miRC169z-5p | VIT_201s0146g00380 | 2                      | UCCGUUCAGUAGGAACCGAU   | AGGCAAGUCAUCCUUCGCUA   | 1     | litaf-domain-containing protein response to absence of light                               |
| vvi-miRC169z-5p | VIT_208s0007g08250 | 14                     | UCCGUUCAGUAGGAACCGAU   | AGGCAAAUCAUUCUUGGCUU   | 2.5   | nuclear transcription factor y subunit a- regulation of transcription                      |
| vvi-miRC169z-5p | VIT_209s0002g01590 | 3                      | UCCGUUCAGUAGGAACCGAU   | UGGAAAGUCAUCCUUGGCUG   | 2.5   | nuclear transcription factor y subunit a-3 regulation of transcription                     |
| vvi-miRC169z-5p | VIT_211s0016g01480 | 4                      | UCCGUUCAGUAGGAACCGAU   | GGGCAAUUCAUCCUUGGCUU   | 2.5   | nuclear transcription factor y subunit a- regulation of transcription                      |
| vvi-miRC169z-5p | VIT_213s0064g00860 | 3                      | UCCGUUCAGUAGGAACCGAU   | AGGCAAUUCAUUCUUGGCUU   | 2.5   | nuclear transcription factor y subunit a- regulation of transcription                      |
| vvi-miRC171j-3p | VIT_202s0154g00400 | 1                      | CUAUAACCGUGCCGAGUUAGU  | GAUUAUGGCGCGGCUCAAUCA  | 0.5   | gras family transcription factor regulation of transcription                               |
| vvi-miRC171j-3p | VIT_204s0023g01380 | 1                      | CUAUAACCGUGCCGAGUUAGU  | GAUUAUGGCGCGGCUCAAUCA  | 0.5   | gras family transcription factor regulation of shoot system development                    |
| vvi-miRC171j-3p | VIT_212s0059g00650 | 1                      | CUAUAACCGUGCCGAGUUAGU  | GAUUAUGGUGCGGUUCAAUAA  | 2.5   | hypothetical protein                                                                       |
| vvi-miRC171j-3p | VIT_214s0068g01780 | 1                      | CUAUAACCGUGCCGAGUUAGU  | GAUUAUGGCACGGCUCAAUCA  | 0     | squamosa promoter-binding-like protein 16-like nucleus                                     |
| vvi-miRC171j-3p | VIT_215s0048g00270 | 1                      | CUAUAACCGUGCCGAGUUAGU  | GAUUAUGGCGCGGCUCAAUCA  | 0.5   | gras family transcription factor regulation of transcription                               |
| vvi-miRC171j-3p | VIT_217s0000g01250 | 1                      | CUAUAACCGUGCCGAGUUAGU  | GAUUAUGGCACGGCUCAAUCA  | 0     | protein protein binding                                                                    |
| vvi-miRC171j-5p | VIT_211s0118g00490 | 3                      | AGACUCACUUGGCUCGGUUGU  | UCUGAGUGAACUGAGCAAACC  | 2.5   | octicosapeptide phox domain-containing protein toxin catabolic process                     |
| vvi-miRC171k-3p | VIT_202s0154g00400 | 1                      | CCUCUAUAACUGCGCCGAGUU  | AGGGAAUUAUGGCGCGGCUCAA | 2     | gras family transcription factor regulation of transcription                               |
| vvi-miRC171k-3p | VIT_204s0023g01380 | 1                      | CCUCUAUAACUGCGCCGAGUU  | GGCGAAUUAUGGCGCGGCUCAA | 1.5   | gras family transcription factor regulation of shoot system development                    |
| vvi-miRC171k-3p | VIT_215s0048g00270 | 1                      | CCUCUAUAACUGCGCCGAGUU  | AGGGAAUUAUGGCGCGGCUCAA | 2     | gras family transcription factor regulation of transcription                               |
| vvi-miRC171k-3p | VIT_217s0000g09495 | 1                      | CCUCUAUAACUGCGCCGAGUU  | UGAGAAUUAUGACGAGGCUUAA | 2.5   | serine-threonine protein plant- protein phosphorylation                                    |
| vvi-miRC171l-3p | VIT_202s0154g00400 | 1                      | CUAUAACCGUGCCGAGUUAGU  | GAUUAUGGCGCGGCUCAAUCA  | 0.5   | gras family transcription factor regulation of transcription                               |

| miRNA name      | Target gene        | Number of target sites | miRNA sequence        | Target sequence        | Score | Target annotation                                                                |
|-----------------|--------------------|------------------------|-----------------------|------------------------|-------|----------------------------------------------------------------------------------|
| vvi-miRC171l-3p | VIT_204s0023g01380 | 1                      | CUAUAACCGUGCCGAGUUAGU | GAUUAUUGGCGCGGCUCAAUCA | 0.5   | gras family transcription factor regulation of shoot system development          |
| vvi-miRC171l-3p | VIT_212s0059g00650 | 1                      | CUAUAACCGUGCCGAGUUAGU | GAUUAUUGGUGCGGUUCAAUAA | 2.5   | hypothetical protein                                                             |
| vvi-miRC171l-3p | VIT_214s0068g01780 | 1                      | CUAUAACCGUGCCGAGUUAGU | GAUUAUUGGCACGGCUCAAUCA | 0     | squamosa promoter-binding-like protein 16-like nucleus                           |
| vvi-miRC171l-3p | VIT_215s0048g00270 | 1                      | CUAUAACCGUGCCGAGUUAGU | GAUUAUUGGCGCGGCUCAAUCA | 0.5   | gras family transcription factor regulation of transcription                     |
| vvi-miRC171l-3p | VIT_217s0000g01250 | 1                      | CUAUAACCGUGCCGAGUUAGU | GAUUAUUGGCACGGCUCAAUCA | 0     | protein protein binding                                                          |
| vvi-miRC171n-3p | VIT_202s0154g00400 | 1                      | CUAUAACCGUGCCGAGUUAGU | GAUUAUUGGCGCGGCUCAAUCA | 0.5   | gras family transcription factor regulation of transcription                     |
| vvi-miRC171n-3p | VIT_204s0023g01380 | 1                      | CUAUAACCGUGCCGAGUUAGU | GAUUAUUGGCGCGGCUCAAUCA | 0.5   | gras family transcription factor regulation of shoot system development          |
| vvi-miRC171n-3p | VIT_212s0059g00650 | 1                      | CUAUAACCGUGCCGAGUUAGU | GAUUAUUGGUGCGGUUCAAUAA | 2.5   | hypothetical protein                                                             |
| vvi-miRC171n-3p | VIT_214s0068g01780 | 1                      | CUAUAACCGUGCCGAGUUAGU | GAUUAUUGGCACGGCUCAAUCA | 0     | squamosa promoter-binding-like protein 16-like nucleus                           |
| vvi-miRC171n-3p | VIT_215s0048g00270 | 1                      | CUAUAACCGUGCCGAGUUAGU | GAUUAUUGGCGCGGCUCAAUCA | 0.5   | gras family transcription factor regulation of transcription                     |
| vvi-miRC171n-3p | VIT_217s0000g01250 | 1                      | CUAUAACCGUGCCGAGUUAGU | GAUUAUUGGCACGGCUCAAUCA | 0     | protein protein binding                                                          |
| vvi-miRC172e-3p | VIT_203s0038g03920 | 2                      | CGUCGUAGUAGUUCUAAGAGU | GCAGCACCAUCA-AUUCUCA   | 2.5   | glutamate receptor extracellular-glutamate-gated ion channel activity            |
| vvi-miRC172e-3p | VIT_206s0004g03590 | 3                      | CGUCGUAGUAGUUCUAAGAGU | GCAGCAUCAUCAGGAUUCUCA  | 0.5   | ethylene-responsive transcription factor rap2-7-like oxidation-reduction process |
| vvi-miRC172e-3p | VIT_206s0061g00290 | 1                      | CGUCGUAGUAGUUCUAAGAGU | GUAGCAUCAUCAAGAUUCACA  | 1.5   | hypothetical protein                                                             |
| vvi-miRC172e-3p | VIT_207s0031g00220 | 3                      | CGUCGUAGUAGUUCUAAGAGU | GCAGCAUCAUCAGGAUUCUCA  | 1.5   | transcription factor apetala2 seed development                                   |
| vvi-miRC172e-3p | VIT_208s0040g03180 | 1                      | CGUCGUAGUAGUUCUAAGAGU | GCAGCAUCAUCAGGAUUCUUG  | 1.5   | ap2 domain-containing transcription factor oxidation-reduction process           |
| vvi-miRC172e-3p | VIT_209s0018g01300 | 1                      | CGUCGUAGUAGUUCUAAGAGU | GCAGCAUCAUCAAGAAUCGCA  | 2     | uncharacterized protein protein heterodimerization activity                      |
| vvi-miRC172e-3p | VIT_213s0019g03550 | 2                      | CGUCGUAGUAGUUCUAAGAGU | GCAGCAUCAUCAGGAUUCUCA  | 2.5   | ap2 domain-containing transcription factor oxidation-reduction process           |
| vvi-miRC172g-3p | VIT_203s0038g03920 | 2                      | CGUCGUAGUAGUUCUAAGAGU | GCAGCACCAUCA-AUUCUCA   | 2.5   | glutamate receptor extracellular-glutamate-gated ion channel activity            |
| vvi-miRC172g-3p | VIT_206s0004g03590 | 3                      | CGUCGUAGUAGUUCUAAGAGU | GCAGCAUCAUCAGGAUUCUCA  | 0.5   | ethylene-responsive transcription factor rap2-7-like oxidation-reduction process |
| vvi-miRC172g-3p | VIT_206s0061g00290 | 1                      | CGUCGUAGUAGUUCUAAGAGU | GUAGCAUCAUCAAGAUUCACA  | 1.5   | hypothetical protein                                                             |

| miRNA name       | Target gene        | Number of target sites | miRNA sequence        | Target sequence       | Score | Target annotation                                                                                    |
|------------------|--------------------|------------------------|-----------------------|-----------------------|-------|------------------------------------------------------------------------------------------------------|
| vvi-miRC172g-3p  | VIT_207s0031g00220 | 3                      | CGUCGUAGUAGUUCUAAGAGU | GCAGCAUCAUCAGGAUUCCCA | 1.5   | transcription factor apetala2 seed development                                                       |
| vvi-miRC172g-3p  | VIT_208s0040g03180 | 1                      | CGUCGUAGUAGUUCUAAGAGU | GCAGCAUCAUCAGGAUUCUUG | 1.5   | ap2 domain-containing transcription factor oxidation-reduction process                               |
| vvi-miRC172g-3p  | VIT_209s0018g01300 | 1                      | CGUCGUAGUAGUUCUAAGAGU | GCAGCAUCAUCAAGAAUCGCA | 2     | uncharacterized protein protein heterodimerization activity                                          |
| vvi-miRC172g-3p  | VIT_213s0019g03550 | 2                      | CGUCGUAGUAGUUCUAAGAGU | GCAGCAUCAUCAGGAUUCCCU | 2.5   | ap2 domain-containing transcription factor oxidation-reduction process                               |
| vvi-miRC3624a-3p | VIT_200s0194g00300 | 1                      | UCAUCAUACGACGACGGGACU | AGUAGUAUGCUGCUGCCCUGA | 0     | uncharacterized protein loc1002608dd metal ion transport                                             |
| vvi-miRC3624a-3p | VIT_200s0194g00330 | 2                      | UCAUCAUACGACGACGGGACU | AGUAGUAUGCUGCAACCCUGA | 2     | proline-rich protein metal ion transport                                                             |
| vvi-miRC3624a-3p | VIT_200s0194g00340 | 2                      | UCAUCAUACGACGACGGGACU | AGUAGUAUGCUGCUGCCCUGA | 0     | hypothetical protein                                                                                 |
| vvi-miRC3624a-3p | VIT_200s0259g00070 | 2                      | UCAUCAUACGACGACGGGACU | AGUAGUAUGCUGCAGCCCUCA | 2     | proline-rich protein metal ion transport                                                             |
| vvi-miRC3624a-3p | VIT_200s0259g00100 | 4                      | UCAUCAUACGACGACGGGACU | AGUAGUAUGCUGCAGCCCUCA | 2     | proline-rich protein metal ion transport                                                             |
| vvi-miRC3624a-3p | VIT_200s0753g00010 | 1                      | UCAUCAUACGACGACGGGACU | AGUAGUAUGCUGCAACCCUGA | 2     | proline-rich protein metal ion transport                                                             |
| vvi-miRC3624a-3p | VIT_200s0753g00030 | 1                      | UCAUCAUACGACGACGGGACU | AGUAGUAUGUUGUUGCCCUGA | 1     | hypothetical protein                                                                                 |
| vvi-miRC3624a-3p | VIT_200s2419g00010 | 1                      | UCAUCAUACGACGACGGGACU | AGUAGUAUGCAGCUACCCUGA | 2     | uncharacterized protein loc1008524dd metal ion transport                                             |
| vvi-miRC390a-5p  | VIT_206s0004g01080 | 1                      | CCGCGAUAGGGAGGACUCGAA | GGUGUUAUCCUCUUGAGUUU  | 2.5   | dna (cytosine-5)-methyltransferase DNA methylation on cytosine within a CNG sequence                 |
| vvi-miRC390a-5p  | VIT_210s0003g01890 | 1                      | CCGCGAUAGGGAGGACUCGAA | GGCGUUCUCCUCCUGAGCUU  | 2     | lrr receptor-like serine threonine-protein kinase rfk1 protein phosphorylation                       |
| vvi-miRC390a-5p  | VIT_212s0059g01410 | 1                      | CCGCGAUAGGGAGGACUCGAA | GGCGAUAUCUCUCCUGAGCUU | 1.5   | hypothetical protein                                                                                 |
| vvi-miRC390a-5p  | VIT_216s0098g01090 | 1                      | CCGCGAUAGGGAGGACUCGAA | GGCUCUAUACCUCCUGAGCUU | 2     | leucine-rich repeat receptor-like protein kinase pep1 defense response                               |
| vvi-miRC396e-5p  | VIT_200s0179g00260 | 1                      | UUCAAGUUCUUUCGGCACCUU | GGGGUCAAGAGACCGUGGAA  | 2.5   | calcium-transporting atpase plasma membrane-type-like respiratory burst involved in defense response |
| vvi-miRC396e-5p  | VIT_201s0026g02170 | 1                      | UUCAAGUUCUUUCGGCACCUU | AAGUUGAAGAAGCCAUGGAA  | 2.5   | ran gtpase binding gravitropism                                                                      |
| vvi-miRC403g-5p  | VIT_205s0077g00800 | 2                      | CUCAAACACGCACUUAGAUU  | AAGUUUGUGCGUGAAUCAAA  | 2     | gins complex subunit 4 regulation of cell cycle                                                      |
| vvi-miRC403g-5p  | VIT_207s0005g01690 | 1                      | CUCAAACACGCACUUAGAUU  | GAGUUUGUGCGUGACUCUAA  | 1     | hypothetical protein                                                                                 |
| vvi-miRC403g-5p  | VIT_210s0042g01150 | 1                      | CUCAAACACGCACUUAGAUU  | GAGUUUGUGCGUGAAUCUAA  | 0     | protein argonaute 2-like defense response to bacterium                                               |
| vvi-miRC403g-5p  | VIT_210s0042g01180 | 2                      | CUCAAACACGCACUUAGAUU  | GAGUUUGUGCGUGAAUCUAA  | 0     | protein argonaute 2-like defense response to bacterium                                               |
| vvi-miRC403g-5p  | VIT_210s0042g01200 | 2                      | CUCAAACACGCACUUAGAUU  | GAGUUUGUGCGUGAAUCUAA  | 0     | protein argonaute 2-like defense response to bacterium                                               |
| vvi-miRC403g-5p  | VIT_211s0052g00930 | 7                      | CUCAAACACGCACUUAGAUU  | GAGCUUGUGCAUGAAUCUGA  | 2.5   | set domain-containing protein coenzyme A                                                             |
| vvi-miRC403g-5p  | VIT_215s0021g01190 | 1                      | CUCAAACACGCACUUAGAUU  | GAGGUUGUGUGUGAAUCUAA  | 1.5   | hypothetical protein                                                                                 |
| vvi-miRC477c-5p  | VIT_201s0010g02270 | 1                      | UUUAACCUUCGGAAACUCCCU | AUAUUGGAAGCCUUGAGGGA  | 1     | gras family transcription factor regulation of transcription                                         |

| miRNA name      | Target gene        | Number of target sites | miRNA sequence        | Target sequence       | Score | Target annotation                                                                     |
|-----------------|--------------------|------------------------|-----------------------|-----------------------|-------|---------------------------------------------------------------------------------------|
| vvi-miRC477c-5p | VIT_217s0000g10300 | 1                      | UUUAACCUUCGGAAACUCCCU | AUAUUGGAAGCCUUUGAGGGA | 1     | gras family transcription factor regulation of transcription                          |
| vvi-miRC477i-5p | VIT_201s0010g02270 | 1                      | UUUAACCUUCGGAAACUCCCU | AUAUUGGAAGCCUUUGAGGGA | 1     | gras family transcription factor regulation of transcription                          |
| vvi-miRC477i-5p | VIT_217s0000g10300 | 1                      | UUUAACCUUCGGAAACUCCCU | AUAUUGGAAGCCUUUGAGGGA | 1     | gras family transcription factor regulation of transcription                          |
| vvi-miRC477j-3p | VIT_212s0028g01600 | 1                      | CCAGGGGGUAGCCGAAGGUCG | GUUCCUCAUCUGCUUCCAGC  | 2.5   | atp-dependent zinc metalloprotease ftsh<br>chloroplastic-like pentose-phosphate shunt |
| vvi-miRC477j-5p | VIT_201s0010g02270 | 1                      | UUUAACCUUCGGAAACUCCCU | AUAUUGGAAGCCUUUGAGGGA | 1     | gras family transcription factor regulation of transcription                          |
| vvi-miRC477j-5p | VIT_217s0000g10300 | 1                      | UUUAACCUUCGGAAACUCCCU | AUAUUGGAAGCCUUUGAGGGA | 1     | gras family transcription factor regulation of transcription                          |
| vvi-miRC477k-5p | VIT_201s0010g02270 | 1                      | UUUAACCUUCGGAAACUCCCU | AUAUUGGAAGCCUUUGAGGGA | 1     | gras family transcription factor regulation of transcription                          |
| vvi-miRC477k-5p | VIT_217s0000g10300 | 1                      | UUUAACCUUCGGAAACUCCCU | AUAUUGGAAGCCUUUGAGGGA | 1     | gras family transcription factor regulation of transcription                          |
| vvi-miRC477l-5p | VIT_201s0010g02270 | 1                      | UUUAACCUUCGGAAACUCCCU | AUAUUGGAAGCCUUUGAGGGA | 1     | gras family transcription factor regulation of transcription                          |
| vvi-miRC477l-5p | VIT_217s0000g10300 | 1                      | UUUAACCUUCGGAAACUCCCU | AUAUUGGAAGCCUUUGAGGGA | 1     | gras family transcription factor regulation of transcription                          |
| vvi-miRC477m-5p | VIT_201s0010g02270 | 1                      | UUUAACCUUCGGAAACUCCCU | AUAUUGGAAGCCUUUGAGGGA | 1     | gras family transcription factor regulation of transcription                          |
| vvi-miRC477m-5p | VIT_217s0000g10300 | 1                      | UUUAACCUUCGGAAACUCCCU | AUAUUGGAAGCCUUUGAGGGA | 1     | gras family transcription factor regulation of transcription                          |
| vvi-miRC477n-3p | VIT_202s0087g00760 | 1                      | CAAGGGGGUGGCUGAAGGUUG | GUUCUCCACUGCCUCCAAC   | 2.5   | pentatricopeptide repeat-containing protein<br>mitochondrion                          |
| vvi-miRC477n-3p | VIT_218s0001g12680 | 3                      | CAAGGGGGUGGCUGAAGGUUG | GUUCCCCGCGACUCCAAC    | 1     | hypothetical protein                                                                  |
| vvi-miRC477n-5p | VIT_201s0010g02270 | 1                      | UUUAACCUUCGGAAACUCCCU | AUAUUGGAAGCCUUUGAGGGA | 1     | gras family transcription factor regulation of transcription                          |
| vvi-miRC477n-5p | VIT_217s0000g10300 | 1                      | UUUAACCUUCGGAAACUCCCU | AUAUUGGAAGCCUUUGAGGGA | 1     | gras family transcription factor regulation of transcription                          |
| vvi-miRC477o-3p | VIT_218s0001g12680 | 3                      | CCAGGGGGUGGCUGAAGGUUG | GUUCCCCGCGACUCCAAC    | 2     | hypothetical protein                                                                  |
| vvi-miRC477o-5p | VIT_201s0010g02270 | 1                      | UUUAACCUUCGGAAACUCCCU | AUAUUGGAAGCCUUUGAGGGA | 1     | gras family transcription factor regulation of transcription                          |



| miRNA name      | Target gene        | Number of target sites | miRNA sequence         | Target sequence         | Score | Target annotation                                                                            |
|-----------------|--------------------|------------------------|------------------------|-------------------------|-------|----------------------------------------------------------------------------------------------|
| vvi-miRC477o-5p | VIT_217s0000g10300 | 1                      | UUUAACCUUCGGAAACUCCCU  | AUAUUGGAAGCCUUGAGGGGA   | 1     | gras family transcription factor regulation of transcription                                 |
| vvi-miRC477p-5p | VIT_201s0010g02270 | 1                      | UUUAACCUUCGGAAACUCCCU  | AUAUUGGAAGCCUUGAGGGGA   | 1     | gras family transcription factor regulation of transcription                                 |
| vvi-miRC477p-5p | VIT_217s0000g10300 | 1                      | UUUAACCUUCGGAAACUCCCU  | AUAUUGGAAGCCUUGAGGGGA   | 1     | gras family transcription factor regulation of transcription                                 |
| vvi-miRC482a-3p | VIT_212s0034g01700 | 1                      | AACCUUACCCGCCGUAACCCU  | UGGGU AUGGGCGGUAUUGGGAA | 2.5   | disease resistance rpp13-like protein 1-like defense response                                |
| vvi-miRC482a-3p | VIT_217s0000g10080 | 3                      | AACCUUACCCGCCGUAACCCU  | UUCGAGUGGGCGGCAAUGGGAA  | 2.5   | domain-containing protein os01g09054dd DNA binding                                           |
| vvi-miRC482b-3p | VIT_209s0002g03790 | 1                      | CCUUACCCUCCACAACCAUUCU | GGAAUGGGAGGUGUUGGGAAAA  | 2     | probable disease resistance protein at5g63020-like defense response                          |
| vvi-miRC482b-3p | VIT_209s0002g04890 | 1                      | CCUUACCCUCCACAACCAUUCU | GGAAUGGGGGGUGUUGGCAAAA  | 2.5   | disease resistance protein rps5-like nucleoside-triphosphatase activity                      |
| vvi-miRC482b-3p | VIT_209s0002g04950 | 1                      | CCUUACCCUCCACAACCAUUCU | GGAAUGGGGGGUGUUGGCAAAA  | 2.5   | disease resistance protein rps5-like nucleoside-triphosphatase activity                      |
| vvi-miRC482b-3p | VIT_209s0002g04980 | 1                      | CCUUACCCUCCACAACCAUUCU | GGAAUGGGGGGUGUUGGCAAAA  | 2.5   | disease resistance protein rps5-like nucleoside-triphosphatase activity                      |
| vvi-miRC482b-3p | VIT_209s0002g05040 | 1                      | CCUUACCCUCCACAACCAUUCU | GGAAUGGGGGGUGUUGGCAAAA  | 2.5   | disease resistance protein rps5-like nucleoside-triphosphatase activity                      |
| vvi-miRC482b-3p | VIT_209s0002g05920 | 4                      | CCUUACCCUCCACAACCAUUCU | GGAAUGGGGGGUGUUGGCAAAA  | 2.5   | disease resistance protein rps5-like nucleoside-triphosphatase activity                      |
| vvi-miRC482b-3p | VIT_209s0018g00480 | 1                      | CCUUACCCUCCACAACCAUUCU | GGGAUGGGAGGCGUUGGGAAGA  | 2.5   | probable disease resistance protein at5g63020-like plant-type hypersensitive response        |
| vvi-miRC482b-3p | VIT_213s0047g00095 | 1                      | CCUUACCCUCCACAACCAUUCU | GGGAUGGGUGGAGUUGGUAAGA  | 2.5   | hypothetical protein                                                                         |
| vvi-miRC482b-3p | VIT_213s0064g01165 | 1                      | CCUUACCCUCCACAACCAUUCU | GGAGUGGGAGGUGUUGAUAGGA  | 2     | anthocyanin 5-aromatic acyltransferase-like                                                  |
| vvi-miRC530-3p  | VIT_200s0267g00060 | 1                      | AGACGUGGAAGUGGACGUGGA  | UCUUCACCUUCACCU-CACCU   | 2.5   | hypothetical protein                                                                         |
| vvi-miRC530-3p  | VIT_201s0011g03410 | 4                      | AGACGUGGAAGUGGACGUGGA  | ACUGCACCUGCACCUGCACCU   | 2     | uv excision repair protein proteasome binding                                                |
| vvi-miRC530-3p  | VIT_201s0011g03410 | 8                      | AGACGUGGAAGUGGACGUGGA  | CCUGCACCUGCACCUGCACCU   | 2     | uv excision repair protein proteasome binding                                                |
| vvi-miRC530-3p  | VIT_213s0067g01550 | 1                      | AGACGUGGAAGUGGACGUGGA  | UCUUCACCUUCACCUUCACCU   | 2     | probable lrr receptor-like serine threonine-protein kinase mrh1-like protein phosphorylation |
| vvi-miRC530-3p  | VIT_216s0013g00610 | 1                      | AGACGUGGAAGUGGACGUGGA  | UCUGCAUCUUUAUUGCAUCU    | 2.5   | mago nashi-like protein nucleolus                                                            |
| vvi-miRC530-3p  | VIT_218s0001g01800 | 1                      | AGACGUGGAAGUGGACGUGGA  | UCUGCAUCUGCAUCUGCAUCU   | 2.5   | mrna splicing mRNA binding                                                                   |
| vvi-miRC530-3p  | VIT_218s0086g00180 | 1                      | AGACGUGGAAGUGGACGUGGA  | UCUUCACCUUCACCUUCACCU   | 2     | protein drug transmembrane transport                                                         |
| vvi-miRC530-5p  | VIT_202s0012g02510 | 1                      | UCCACGUCCACGUUACGUCU   | AGGU-CAGGUGCAAAUGCAGG   | 2     | protein zinc ion binding                                                                     |
| vvi-miRC530-5p  | VIT_205s0020g04860 | 6                      | UCCACGUCCACGUUACGUCU   | AGGUGCAGGUGCAAAUGCAGG   | 0.5   | protein zinc ion binding                                                                     |
| vvi-miRC530-5p  | VIT_206s0080g00400 | 1                      | UCCACGUCCACGUUACGUCU   | AGGUACAGGUGCAGGUGCAGA   | 2     | ribosomal protein l1 translation                                                             |
| vvi-miRC530-5p  | VIT_206s0080g00400 | 1                      | UCCACGUCCACGUUACGUCU   | AGGUGCAGGUGCAGAUGCAGG   | 1     | ribosomal protein l1 translation                                                             |
| vvi-miRC530-5p  | VIT_210s0116g00140 | 1                      | UCCACGUCCACGUUACGUCU   | AGGUGGAGAUGC AAAUGCAGG  | 2.5   | subtilisin-like protease-like identical protein binding                                      |

| miRNA name      | Target gene        | Number of target sites | miRNA sequence        | Target sequence        | Score | Target annotation                                                         |
|-----------------|--------------------|------------------------|-----------------------|------------------------|-------|---------------------------------------------------------------------------|
| vvi-miRC530b-5p | VIT_202s0012g02510 | 1                      | UCCACGUCCACGUUUACGUCU | AGGU-CAGGUGCAAAUGCAGG  | 2     | protein zinc ion binding                                                  |
| vvi-miRC530b-5p | VIT_205s0020g04860 | 6                      | UCCACGUCCACGUUUACGUCU | AGGUGCAGGUGCAAAUGCAGG  | 0.5   | protein zinc ion binding                                                  |
| vvi-miRC530b-5p | VIT_206s0080g00400 | 1                      | UCCACGUCCACGUUUACGUCU | AGGUACAGGUGCAGGUGCAGA  | 2     | ribosomal protein I1 translation                                          |
| vvi-miRC530b-5p | VIT_206s0080g00400 | 1                      | UCCACGUCCACGUUUACGUCU | AGGUGCAGGUGCAGAUGCAGG  | 1     | ribosomal protein I1 translation                                          |
| vvi-miRC530b-5p | VIT_210s0116g00140 | 1                      | UCCACGUCCACGUUUACGUCU | AGGUGGAGAUGC AAAUGCAGG | 2.5   | subtilisin-like protease-like identical protein binding                   |
| vvi-miRC7122-3p | VIT_214s0030g00640 | 2                      | CGAAUAUGUCUCUUUCUGCCA | GCUUAUAUA-AGAAAGAUGGU  | 2.5   | DNAJ heat shock n-terminal domain-containing protein protein folding      |
| vvi-miRC827-3p  | VIT_202s0025g04540 | 2                      | ACAAACAACUACUAGUAGAUU | UGUUCGUUGAUGGUCAUCUAA  | 1.5   | spx domain-containing membrane protein vacuolar membrane                  |
| vvi-miRC827-3p  | VIT_204s0008g00910 | 4                      | ACAAACAACUACUAGUAGAUU | UGUUUG-UGAUCAUCAUCUAA  | 2.5   | histone deacetylase 2 histone deacetylase activity                        |
| vvi-miR156b-3p  | VIT_200s0358g00010 | 1                      | CACGAGUGAGAGAAGACAGU  | GUGCUCUCUCUCGUCUGUCA   | 2     | hypothetical protein                                                      |
| vvi-miR156b-3p  | VIT_201s0010g03710 | 6                      | CACGAGUGAGAGAAGACAGU  | GUGCUCUCUCUCUUCUGUCA   | 1     | squamosa promoter-binding-like protein 2 regulation of biological process |
| vvi-miR156b-3p  | VIT_201s0010g03910 | 3                      | CACGAGUGAGAGAAGACAGU  | GUGCUCUCUCUCUUCUGUCA   | 1     | squamosa promoter-binding-like protein 13-like nucleus                    |
| vvi-miR156b-3p  | VIT_201s0011g00130 | 2                      | CACGAGUGAGAGAAGACAGU  | GUGCUCUCUCUCUUCUGUCA   | 1     | squamosa promoter-binding-like protein 6-like DNA binding                 |
| vvi-miR156b-3p  | VIT_204s0008g00960 | 2                      | CACGAGUGAGAGAAGACAGU  | GUGCUCACUCUCUUCUGUCA   | 0     | calcineurin b-like protein dd multidimensional cell growth                |
| vvi-miR156b-3p  | VIT_204s0008g02640 | 2                      | CACGAGUGAGAGAAGACAGU  | GUGCUCUCUCUCUUCUGUCA   | 1     | plastid-lipid-associated protein 8 photosynthesis                         |
| vvi-miR156b-3p  | VIT_208s0007g06270 | 1                      | CACGAGUGAGAGAAGACAGU  | GUGCUCUCUCUCUUCUGUCA   | 1     | squamosa promoter-binding-like protein 9-like nucleus                     |
| vvi-miR156b-3p  | VIT_209s0002g04110 | 2                      | CACGAGUGAGAGAAGACAGU  | GUGGUCACUCUUUGCUGUCA   | 2.5   | peroxisome assembly protein cytosol                                       |
| vvi-miR156b-3p  | VIT_211s0065g00170 | 7                      | CACGAGUGAGAGAAGACAGU  | GUGCUCUCUCUCUUCUGUCA   | 1     | squamosa promoter-binding-like protein 12-like RNA binding                |
| vvi-miR156b-3p  | VIT_212s0028g03350 | 1                      | CACGAGUGAGAGAAGACAGU  | AUGCUCUCUCUCUUCUGUCA   | 2     | squamosa promoter binding 4 regulation of transcription                   |
| vvi-miR156b-3p  | VIT_214s0068g01780 | 1                      | CACGAGUGAGAGAAGACAGU  | GUGCUUCUCUCUUCUGUCA    | 2.5   | squamosa promoter-binding-like protein 16-like nucleus                    |
| vvi-miR156b-3p  | VIT_214s0108g00380 | 1                      | CACGAGUGAGAGAAGACAGU  | GUACUCACUCUCUUCUGUCA   | 1     | probable receptor-like protein kinase at5g15080-like ATP binding          |
| vvi-miR156b-3p  | VIT_215s0021g02290 | 1                      | CACGAGUGAGAGAAGACAGU  | GUGCUCUCUCUCUUCUGUCA   | 1     | squamosa promoter-binding-like protein 7-like transcription               |

| miRNA name     | Target gene        | Number of target sites | miRNA sequence       | Target sequence       | Score | Target annotation                                                         |
|----------------|--------------------|------------------------|----------------------|-----------------------|-------|---------------------------------------------------------------------------|
| vvi-miR156b-3p | VIT_217s0000g01260 | 1                      | CACGAGUGAGAGAAGACAGU | GUGCUCUCUCUCUUCUGUCA  | 1     | squamosa promoter-binding-like protein dd DNA binding                     |
| vvi-miR156b-3p | VIT_217s0000g05020 | 3                      | CACGAGUGAGAGAAGACAGU | GUGCUCUCUCUCUUCUGUCA  | 1     | squamosa promoter-binding-like protein 6-like DNA binding                 |
| vvi-miR156b-3p | VIT_217s0000g08780 | 5                      | CACGAGUGAGAGAAGACAGU | UUGCUCAUUUUCUUCUGUUA  | 2.5   | uncharacterized protein chloroplast                                       |
| vvi-miR156b-3p | VIT_219s0014g02350 | 1                      | CACGAGUGAGAGAAGACAGU | UUGCUCUUCUCUCUUCUGUCA | 2     | squamosa promoter binding 4 regulation of transcription                   |
| vvi-miR156b-3p | VIT_219s0090g01180 | 2                      | CACGAGUGAGAGAAGACAGU | AUGCUCACUCUUUUCUGUCA  | 1.5   | brain protein dd chaperone binding                                        |
| vvi-miR156c-5p | VIT_200s0358g00010 | 1                      | CACGAGUGAGAGAAGACAGU | GUGCUCUCUCUCGUCUGUCA  | 2     | hypothetical protein                                                      |
| vvi-miR156c-5p | VIT_201s0010g03710 | 6                      | CACGAGUGAGAGAAGACAGU | GUGCUCUCUCUCUUCUGUCA  | 1     | squamosa promoter-binding-like protein 2 regulation of biological process |
| vvi-miR156c-5p | VIT_201s0010g03910 | 3                      | CACGAGUGAGAGAAGACAGU | GUGCUCUCUCUCUUCUGUCA  | 1     | squamosa promoter-binding-like protein 13-like nucleus                    |
| vvi-miR156c-5p | VIT_201s0011g00130 | 2                      | CACGAGUGAGAGAAGACAGU | GUGCUCUCUCUCUUCUGUCA  | 1     | squamosa promoter-binding-like protein 6-like DNA binding                 |
| vvi-miR156c-5p | VIT_204s0008g00960 | 2                      | CACGAGUGAGAGAAGACAGU | GUGCUCACUCUCUUCUGUCA  | 0     | calcineurin b-like protein dd multidimensional cell growth                |
| vvi-miR156c-5p | VIT_204s0008g02640 | 2                      | CACGAGUGAGAGAAGACAGU | GUGCUCUCUCUCUUCUGUCA  | 1     | plastid-lipid-associated protein 8 photosynthesis                         |
| vvi-miR156c-5p | VIT_208s0007g06270 | 1                      | CACGAGUGAGAGAAGACAGU | GUGCUCUCUCUCUUCUGUCA  | 1     | squamosa promoter-binding-like protein 9-like nucleus                     |
| vvi-miR156c-5p | VIT_209s0002g04110 | 2                      | CACGAGUGAGAGAAGACAGU | GUGGUCACUCUUUGCUGUCA  | 2.5   | peroxisome assembly protein cytosol                                       |
| vvi-miR156c-5p | VIT_211s0065g00170 | 7                      | CACGAGUGAGAGAAGACAGU | GUGCUCUCUCUCUUCUGUCA  | 1     | squamosa promoter-binding-like protein 12-like RNA binding                |
| vvi-miR156c-5p | VIT_212s0028g03350 | 1                      | CACGAGUGAGAGAAGACAGU | AUGCUCUCUCUCUUCUGUCA  | 2     | squamosa promoter binding 4 regulation of transcription                   |
| vvi-miR156c-5p | VIT_214s0068g01780 | 1                      | CACGAGUGAGAGAAGACAGU | GUGCUCUCUCUCUUCUGUCA  | 2.5   | squamosa promoter-binding-like protein 16-like nucleus                    |
| vvi-miR156c-5p | VIT_214s0108g00380 | 1                      | CACGAGUGAGAGAAGACAGU | GUACUCACUCUCUUCUGUCA  | 1     | probable receptor-like protein kinase at5g15080-like ATP binding          |
| vvi-miR156c-5p | VIT_215s0021g02290 | 1                      | CACGAGUGAGAGAAGACAGU | GUGCUCUCUCUCUUCUGUCA  | 1     | squamosa promoter-binding-like protein 7-like transcription               |
| vvi-miR156c-5p | VIT_217s0000g01260 | 1                      | CACGAGUGAGAGAAGACAGU | GUGCUCUCUCUCUUCUGUCA  | 1     | squamosa promoter-binding-like protein dd DNA binding                     |
| vvi-miR156c-5p | VIT_217s0000g05020 | 3                      | CACGAGUGAGAGAAGACAGU | GUGCUCUCUCUCUUCUGUCA  | 1     | squamosa promoter-binding-like protein 6-like DNA binding                 |
| vvi-miR156c-5p | VIT_217s0000g08780 | 5                      | CACGAGUGAGAGAAGACAGU | UUGCUCAUUUUCUUCUGUUA  | 2.5   | uncharacterized protein chloroplast                                       |
| vvi-miR156c-5p | VIT_219s0014g02350 | 1                      | CACGAGUGAGAGAAGACAGU | UUGCUCUUCUCUCUUCUGUCA | 2     | squamosa promoter binding 4 regulation of transcription                   |
| vvi-miR156c-5p | VIT_219s0090g01180 | 2                      | CACGAGUGAGAGAAGACAGU | AUGCUCACUCUUUUCUGUCA  | 1.5   | brain protein dd chaperone binding                                        |
| vvi-miR156d-5p | VIT_200s0358g00010 | 1                      | CACGAGUGAGAGAAGACAGU | GUGCUCUCUCUCGUCUGUCA  | 2     | hypothetical protein                                                      |

| miRNA name     | Target gene        | Number of target sites | miRNA sequence       | Target sequence       | Score | Target annotation                                                         |
|----------------|--------------------|------------------------|----------------------|-----------------------|-------|---------------------------------------------------------------------------|
| vvi-miR156d-5p | VIT_201s0010g03710 | 6                      | CACGAGUGAGAGAAGACAGU | GUGCUCUCUCUCUUCUGUCA  | 1     | squamosa promoter-binding-like protein 2 regulation of biological process |
| vvi-miR156d-5p | VIT_201s0010g03910 | 3                      | CACGAGUGAGAGAAGACAGU | GUGCUCUCUCUCUUCUGUCA  | 1     | squamosa promoter-binding-like protein 13-like nucleus                    |
| vvi-miR156d-5p | VIT_201s0011g00130 | 2                      | CACGAGUGAGAGAAGACAGU | GUGCUCUCUCUCUUCUGUCA  | 1     | squamosa promoter-binding-like protein 6-like DNA binding                 |
| vvi-miR156d-5p | VIT_204s0008g00960 | 2                      | CACGAGUGAGAGAAGACAGU | GUGCUCACUCUCUUCUGUCA  | 0     | calcineurin b-like protein dd multidimensional cell growth                |
| vvi-miR156d-5p | VIT_204s0008g02640 | 2                      | CACGAGUGAGAGAAGACAGU | GUGCUCUCUCUCUUCUGUCA  | 1     | plastid-lipid-associated protein 8 photosynthesis                         |
| vvi-miR156d-5p | VIT_208s0007g06270 | 1                      | CACGAGUGAGAGAAGACAGU | GUGCUCUCUCUCUUCUGUCA  | 1     | squamosa promoter-binding-like protein 9-like nucleus                     |
| vvi-miR156d-5p | VIT_209s0002g04110 | 2                      | CACGAGUGAGAGAAGACAGU | GUGGUCACUCUUUGCUGUCA  | 2.5   | peroxisome assembly protein cytosol                                       |
| vvi-miR156d-5p | VIT_211s0065g00170 | 7                      | CACGAGUGAGAGAAGACAGU | GUGCUCUCUCUCUUCUGUCA  | 1     | squamosa promoter-binding-like protein 12-like RNA binding                |
| vvi-miR156d-5p | VIT_212s0028g03350 | 1                      | CACGAGUGAGAGAAGACAGU | AUGCUCUCUCUCUUCUGUCA  | 2     | squamosa promoter binding 4 regulation of transcription                   |
| vvi-miR156d-5p | VIT_214s0068g01780 | 1                      | CACGAGUGAGAGAAGACAGU | GUGCUCUCUCUCUUCUGUCA  | 2.5   | squamosa promoter-binding-like protein 16-like nucleus                    |
| vvi-miR156d-5p | VIT_214s0108g00380 | 1                      | CACGAGUGAGAGAAGACAGU | GUACUCACUCUCUUCUGUCA  | 1     | probable receptor-like protein kinase at5g15080-like ATP binding          |
| vvi-miR156d-5p | VIT_215s0021g02290 | 1                      | CACGAGUGAGAGAAGACAGU | GUGCUCUCUCUCUUCUGUCA  | 1     | squamosa promoter-binding-like protein 7-like transcription               |
| vvi-miR156d-5p | VIT_217s0000g01260 | 1                      | CACGAGUGAGAGAAGACAGU | GUGCUCUCUCUCUUCUGUCA  | 1     | squamosa promoter-binding-like protein dd DNA binding                     |
| vvi-miR156d-5p | VIT_217s0000g05020 | 3                      | CACGAGUGAGAGAAGACAGU | GUGCUCUCUCUCUUCUGUCA  | 1     | squamosa promoter-binding-like protein 6-like DNA binding                 |
| vvi-miR156d-5p | VIT_217s0000g08780 | 5                      | CACGAGUGAGAGAAGACAGU | UUGCUCAUUUUCUUCUGUUA  | 2.5   | uncharacterized protein chloroplast                                       |
| vvi-miR156d-5p | VIT_219s0014g02350 | 1                      | CACGAGUGAGAGAAGACAGU | UUGCUCUUCUCUCUUCUGUCA | 2     | squamosa promoter binding 4 regulation of transcription                   |
| vvi-miR156d-5p | VIT_219s0090g01180 | 2                      | CACGAGUGAGAGAAGACAGU | AUGCUCACUCUUUCUGUCA   | 1.5   | brain protein dd chaperone binding                                        |
| vvi-miR156e-5p | VIT_201s0010g03710 | 6                      | CACGAGUGAGAGGAGACAGU | GUGCUCUCUCUCUUCUGUCA  | 1.5   | squamosa promoter-binding-like protein 2 regulation of biological process |
| vvi-miR156e-5p | VIT_201s0010g03910 | 3                      | CACGAGUGAGAGGAGACAGU | GUGCUCUCUCUCUUCUGUCA  | 1.5   | squamosa promoter-binding-like protein 13-like nucleus                    |

| miRNA name     | Target gene        | Number of target sites | miRNA sequence        | Target sequence       | Score | Target annotation                                                         |
|----------------|--------------------|------------------------|-----------------------|-----------------------|-------|---------------------------------------------------------------------------|
| vvi-miR156e-5p | VIT_201s0011g00130 | 2                      | CACGAGUGAGAGGAGACAGU  | GUGCUCUCUCUCUUCUGUCA  | 1.5   | squamosa promoter-binding-like protein 6-like DNA binding                 |
| vvi-miR156e-5p | VIT_204s0008g00960 | 2                      | CACGAGUGAGAGGAGACAGU  | GUGCUCACUCUCUUCUGUCA  | 0.5   | calcineurin b-like protein dd multidimensional cell growth                |
| vvi-miR156e-5p | VIT_204s0008g02640 | 2                      | CACGAGUGAGAGGAGACAGU  | GUGCUCUCUCUCCUCUGUCA  | 1     | plastid-lipid-associated protein 8 photosynthesis                         |
| vvi-miR156e-5p | VIT_205s0020g02110 | 1                      | CACGAGUGAGAGGAGACAGU  | GAGCUCACUCUCCUUUGACA  | 2.5   | peroxidase dd heme binding                                                |
| vvi-miR156e-5p | VIT_208s0007g06270 | 1                      | CACGAGUGAGAGGAGACAGU  | GUGCUCUCUCUCUUCUGUCA  | 1.5   | squamosa promoter-binding-like protein 9-like nucleus                     |
| vvi-miR156e-5p | VIT_211s0065g00170 | 7                      | CACGAGUGAGAGGAGACAGU  | GUGCUCUCUCUCUUCUGUCA  | 1.5   | squamosa promoter-binding-like protein 12-like RNA binding                |
| vvi-miR156e-5p | VIT_212s0028g03350 | 1                      | CACGAGUGAGAGGAGACAGU  | AUGCUCUCUCUCUUCUGUCA  | 2.5   | squamosa promoter binding 4 regulation of transcription                   |
| vvi-miR156e-5p | VIT_214s0108g00380 | 1                      | CACGAGUGAGAGGAGACAGU  | GUACUCACUCUCUUCUGUCA  | 1.5   | probable receptor-like protein kinase at5g15080-like ATP binding          |
| vvi-miR156e-5p | VIT_215s0021g02290 | 1                      | CACGAGUGAGAGGAGACAGU  | GUGCUCUCUCUCUUCUGUCA  | 1.5   | squamosa promoter-binding-like protein 7-like transcription               |
| vvi-miR156e-5p | VIT_217s0000g01260 | 1                      | CACGAGUGAGAGGAGACAGU  | GUGCUCUCUCUCUUCUGUCA  | 1.5   | squamosa promoter-binding-like protein dd DNA binding                     |
| vvi-miR156e-5p | VIT_217s0000g05020 | 3                      | CACGAGUGAGAGGAGACAGU  | GUGCUCUCUCUCUUCUGUCA  | 1.5   | squamosa promoter-binding-like protein 6-like DNA binding                 |
| vvi-miR156e-5p | VIT_219s0014g02350 | 1                      | CACGAGUGAGAGGAGACAGU  | UUGCUCUUCUCUCUUCUGUCA | 2.5   | squamosa promoter binding 4 regulation of transcription                   |
| vvi-miR156e-5p | VIT_219s0090g01180 | 2                      | CACGAGUGAGAGGAGACAGU  | AUGCUCACUCUUUUCUGUCA  | 2     | brain protein dd chaperone binding                                        |
| vvi-miR156f-5p | VIT_201s0010g03710 | 6                      | CACGAGAGAUAGAAGACAGUU | GUGCUCUCUCUCUUCUGUCA  | 1     | squamosa promoter-binding-like protein 2 regulation of biological process |
| vvi-miR156f-5p | VIT_201s0010g03910 | 3                      | CACGAGAGAUAGAAGACAGUU | GUGCUCUCUCUCUUCUGUCAU | 2     | squamosa promoter-binding-like protein 13-like nucleus                    |
| vvi-miR156f-5p | VIT_201s0011g00130 | 2                      | CACGAGAGAUAGAAGACAGUU | GUGCUCUCUCUCUUCUGUCAG | 1.5   | squamosa promoter-binding-like protein 6-like DNA binding                 |
| vvi-miR156f-5p | VIT_208s0007g06270 | 1                      | CACGAGAGAUAGAAGACAGUU | GUGCUCUCUCUCUUCUGUCA  | 1     | squamosa promoter-binding-like protein 9-like nucleus                     |
| vvi-miR156f-5p | VIT_210s0003g00050 | 2                      | CACGAGAGAUAGAAGACAGUU | AUGCUCUCUAUCUCCUGUCA  | 2     | squamosa promoter binding-like protein metal ion binding                  |
| vvi-miR156f-5p | VIT_211s0065g00170 | 7                      | CACGAGAGAUAGAAGACAGUU | GUGCUCUCUCUCUUCUGUCA  | 1     | squamosa promoter-binding-like protein 12-like RNA binding                |
| vvi-miR156f-5p | VIT_214s0068g01780 | 1                      | CACGAGAGAUAGAAGACAGUU | GUGCUCUCUCUCUUCUGUCAU | 2.5   | squamosa promoter-binding-like protein 16-like nucleus                    |
| vvi-miR156f-5p | VIT_215s0021g02290 | 1                      | CACGAGAGAUAGAAGACAGUU | GUGCUCUCUCUCUUCUGUCAU | 2     | squamosa promoter-binding-like protein 7-like transcription               |
| vvi-miR156f-5p | VIT_215s0046g01230 | 1                      | CACGAGAGAUAGAAGACAGUU | GUGCUCUCUGUUUGUGUAA   | 2.5   | hypothetical protein                                                      |

| miRNA name     | Target gene        | Number of target sites | miRNA sequence        | Target sequence       | Score | Target annotation                                                            |
|----------------|--------------------|------------------------|-----------------------|-----------------------|-------|------------------------------------------------------------------------------|
| vvi-miR156f-5p | VIT_216s0039g02000 | 2                      | CACGAGAGAUAGAAGACAGUU | GUGCUUUCUUCUCCGUCAA   | 2.5   | peptidyl-trna hydrolase ii-like protein cytoplasmic membrane-bounded vesicle |
| vvi-miR156f-5p | VIT_217s0000g01260 | 1                      | CACGAGAGAUAGAAGACAGUU | GUGCUCUCUCUCUUCUGUCAU | 2     | squamosa promoter-binding-like protein dd DNA binding                        |
| vvi-miR156f-5p | VIT_217s0000g05020 | 3                      | CACGAGAGAUAGAAGACAGUU | GUGCUCUCUCUCUUCUGUCAU | 2     | squamosa promoter-binding-like protein 6-like DNA binding                    |
| vvi-miR156g-5p | VIT_201s0010g03710 | 6                      | CACGAGAGAUAGAAGACAGUU | GUGCUCUCUCUCUUCUGUCAA | 1     | squamosa promoter-binding-like protein 2 regulation of biological process    |
| vvi-miR156g-5p | VIT_201s0010g03910 | 3                      | CACGAGAGAUAGAAGACAGUU | GUGCUCUCUCUCUUCUGUCAU | 2     | squamosa promoter-binding-like protein 13-like nucleus                       |
| vvi-miR156g-5p | VIT_201s0011g00130 | 2                      | CACGAGAGAUAGAAGACAGUU | GUGCUCUCUCUCUUCUGUCAG | 1.5   | squamosa promoter-binding-like protein 6-like DNA binding                    |
| vvi-miR156g-5p | VIT_208s0007g06270 | 1                      | CACGAGAGAUAGAAGACAGUU | GUGCUCUCUCUCUUCUGUCAA | 1     | squamosa promoter-binding-like protein 9-like nucleus                        |
| vvi-miR156g-5p | VIT_210s0003g00050 | 2                      | CACGAGAGAUAGAAGACAGUU | AUGCUCUCUAUCUCCGUCAA  | 2     | squamosa promoter binding-like protein metal ion binding                     |
| vvi-miR156g-5p | VIT_211s0065g00170 | 7                      | CACGAGAGAUAGAAGACAGUU | GUGCUCUCUCUCUUCUGUCAA | 1     | squamosa promoter-binding-like protein 12-like RNA binding                   |
| vvi-miR156g-5p | VIT_214s0068g01780 | 1                      | CACGAGAGAUAGAAGACAGUU | GUGCUUUCUCUCUUCUGUCAU | 2.5   | squamosa promoter-binding-like protein 16-like nucleus                       |
| vvi-miR156g-5p | VIT_215s0021g02290 | 1                      | CACGAGAGAUAGAAGACAGUU | GUGCUCUCUCUCUUCUGUCAU | 2     | squamosa promoter-binding-like protein 7-like transcription                  |
| vvi-miR156g-5p | VIT_215s0046g01230 | 1                      | CACGAGAGAUAGAAGACAGUU | GUGCUCUCUGUUUUGUGUAA  | 2.5   | hypothetical protein                                                         |
| vvi-miR156g-5p | VIT_216s0039g02000 | 2                      | CACGAGAGAUAGAAGACAGUU | GUGCUUUCUUCUCCGUCAA   | 2.5   | peptidyl-trna hydrolase ii-like protein cytoplasmic membrane-bounded vesicle |
| vvi-miR156g-5p | VIT_217s0000g01260 | 1                      | CACGAGAGAUAGAAGACAGUU | GUGCUCUCUCUCUUCUGUCAU | 2     | squamosa promoter-binding-like protein dd DNA binding                        |
| vvi-miR156g-5p | VIT_217s0000g05020 | 3                      | CACGAGAGAUAGAAGACAGUU | GUGCUCUCUCUCUUCUGUCAU | 2     | squamosa promoter-binding-like protein 6-like DNA binding                    |
| vvi-miR156i-3p | VIT_201s0010g03710 | 6                      | CACGAGAGAUAGAAGACAGUU | GUGCUCUCUCUCUUCUGUCAA | 1     | squamosa promoter-binding-like protein 2 regulation of biological process    |
| vvi-miR156i-3p | VIT_201s0010g03910 | 3                      | CACGAGAGAUAGAAGACAGUU | GUGCUCUCUCUCUUCUGUCAU | 2     | squamosa promoter-binding-like protein 13-like nucleus                       |
| vvi-miR156i-3p | VIT_201s0011g00130 | 2                      | CACGAGAGAUAGAAGACAGUU | GUGCUCUCUCUCUUCUGUCAG | 1.5   | squamosa promoter-binding-like protein 6-like DNA binding                    |

| miRNA name     | Target gene        | Number of target sites | miRNA sequence        | Target sequence       | Score | Target annotation                                                                |
|----------------|--------------------|------------------------|-----------------------|-----------------------|-------|----------------------------------------------------------------------------------|
| vvi-miR156i-3p | VIT_208s0007g06270 | 1                      | CACGAGAGAUAGAAGACAGUU | GUGCUCUCUCUCUUCUGUCA  | 1     | squamosa promoter-binding-like protein 9-like nucleus                            |
| vvi-miR156i-3p | VIT_210s0003g00050 | 2                      | CACGAGAGAUAGAAGACAGUU | AUGCUCUCUAUCUCCUGUCA  | 2     | squamosa promoter binding-like protein metal ion binding                         |
| vvi-miR156i-3p | VIT_211s0065g00170 | 7                      | CACGAGAGAUAGAAGACAGUU | GUGCUCUCUCUCUUCUGUCA  | 1     | squamosa promoter-binding-like protein 12-like RNA binding                       |
| vvi-miR156i-3p | VIT_214s0068g01780 | 1                      | CACGAGAGAUAGAAGACAGUU | GUGCUUUCUCUCUUCUGUCAU | 2.5   | squamosa promoter-binding-like protein 16-like nucleus                           |
| vvi-miR156i-3p | VIT_215s0021g02290 | 1                      | CACGAGAGAUAGAAGACAGUU | GUGCUCUCUCUCUUCUGUCAU | 2     | squamosa promoter-binding-like protein 7-like transcription                      |
| vvi-miR156i-3p | VIT_215s0046g01230 | 1                      | CACGAGAGAUAGAAGACAGUU | GUGCUCUCUGUUUGUGUAA   | 2.5   | hypothetical protein                                                             |
| vvi-miR156i-3p | VIT_216s0039g02000 | 2                      | CACGAGAGAUAGAAGACAGUU | GUGCUUUCUUCUCCGUCA    | 2.5   | peptidyl-trna hydrolase ii-like protein cytoplasmic membrane-bounded vesicle     |
| vvi-miR156i-3p | VIT_217s0000g01260 | 1                      | CACGAGAGAUAGAAGACAGUU | GUGCUCUCUCUCUUCUGUCAU | 2     | squamosa promoter-binding-like protein dd DNA binding                            |
| vvi-miR156i-3p | VIT_217s0000g05020 | 3                      | CACGAGAGAUAGAAGACAGUU | GUGCUCUCUCUCUUCUGUCAU | 2     | squamosa promoter-binding-like protein 6-like DNA binding                        |
| vvi-miR159c-3p | VIT_212s0059g01070 | 2                      | AUCUCGAGGGAAGUUAGGUUU | UAGAGCUCCUUGCAAUACAAA | 2.5   | condensin complex subunit 2-like microtubule cytoskeleton organization           |
| vvi-miR159c-3p | VIT_213s0067g01630 | 1                      | AUCUCGAGGGAAGUUAGGUUU | UGGAGCUCCUUCACUCCAAU  | 2.5   | transcription factor gamyb-like flower development                               |
| vvi-miR159c-3p | VIT_219s0014g01700 | 1                      | AUCUCGAGGGAAGUUAGGUUU | UAGAGCCCCUCAAACAAA    | 2     | hypothetical protein                                                             |
| vvi-miR159c-5p | VIT_201s0011g06470 | 5                      | GAUAACCGAAGUUCUCGAG   | CUAUUGGCCUACAAGGAGCUC | 2     | probable NAD(P)H-dependent oxidoreductase                                        |
| vvi-miR162-3p  | VIT_217s0000g04470 | 1                      | GACCUACGUCUCCAAAUAGCU | CUGGAUGCAGCGGUUCAUCGA | 2     | hypothetical protein                                                             |
| vvi-miR162-5p  | VIT_217s0000g04470 | 1                      | CUAGCUACUUGGCGACGUAGG | GGUCGAUAAACCUCUGCAUCC | 2.5   | hypothetical protein                                                             |
| vvi-miR164a-5p | VIT_203s0038g04270 | 6                      | ACGUGCACGGGACGAAGAGGU | UGCACAUGCCCGUUCUGCA   | 2     | ankyrin repeat domain protein folding                                            |
| vvi-miR164a-5p | VIT_209s0002g00760 | 5                      | ACGUGCACGGGACGAAGAGGU | AGCAUGUGCCCGUUCUCCA   | 1.5   | uncharacterized protein heme binding                                             |
| vvi-miR164a-5p | VIT_217s0000g06400 | 3                      | ACGUGCACGGGACGAAGAGGU | CUCACGUGCCCGUUCUCCA   | 2     | nac domain ipr0034dd sequence-specific DNA binding transcription factor activity |
| vvi-miR164a-5p | VIT_219s0014g02200 | 1                      | ACGUGCACGGGACGAAGAGGU | AGCACGUGCCCGUUCUCCA   | 2     | no apical meristem gynoecium development                                         |
| vvi-miR164a-5p | VIT_219s0027g00230 | 2                      | ACGUGCACGGGACGAAGAGGU | AGCAAGUGCCCGUUCUCCG   | 2.5   | nac domain protein regulation of transcription                                   |
| vvi-miR164c-3p | VIT_201s0137g00270 | 1                      | CUACCCUUCUCCCGUGUAC   | GAUGGGGAGGAGAGGAACAUG | 2.5   | rna recognition motif-containing protein nucleic acid binding                    |
| vvi-miR164c-5p | VIT_203s0038g04270 | 6                      | ACGUGCACGGGACGAAGAGGU | UGCACAUGCCCGUUCUGCA   | 2     | ankyrin repeat domain protein folding                                            |
| vvi-miR164c-5p | VIT_209s0002g00760 | 5                      | ACGUGCACGGGACGAAGAGGU | AGCAUGUGCCCGUUCUCCA   | 1.5   | uncharacterized protein heme binding                                             |
| vvi-miR164c-5p | VIT_217s0000g06400 | 3                      | ACGUGCACGGGACGAAGAGGU | CUCACGUGCCCGUUCUCCA   | 2     | nac domain ipr0034dd sequence-specific DNA binding transcription factor activity |
| vvi-miR164c-5p | VIT_219s0014g02200 | 1                      | ACGUGCACGGGACGAAGAGGU | AGCACGUGCCCGUUCUCCA   | 2     | no apical meristem gynoecium development                                         |
| vvi-miR164c-5p | VIT_219s0027g00230 | 2                      | ACGUGCACGGGACGAAGAGGU | AGCAAGUGCCCGUUCUCCG   | 2.5   | nac domain protein regulation of transcription                                   |
| vvi-miR164d-5p | VIT_203s0038g04270 | 6                      | ACGUGCACGGGACGAAGAGGU | UGCACAUGCCCGUUCUGCA   | 2     | ankyrin repeat domain protein folding                                            |

| miRNA name     | Target gene        | Number of target sites | miRNA sequence        | Target sequence       | Score | Target annotation                                                                |
|----------------|--------------------|------------------------|-----------------------|-----------------------|-------|----------------------------------------------------------------------------------|
| vvi-miR164d-5p | VIT_209s0002g00760 | 5                      | ACGUGCACGGGACGAAGAGGU | AGCAUGUGCCCUGCUUCUCCA | 1.5   | uncharacterized protein heme binding                                             |
| vvi-miR164d-5p | VIT_217s0000g06400 | 3                      | ACGUGCACGGGACGAAGAGGU | CUCACGUGCCCUGCUUCUCCA | 2     | nac domain ipr0034dd sequence-specific DNA binding transcription factor activity |
| vvi-miR164d-5p | VIT_219s0014g02200 | 1                      | ACGUGCACGGGACGAAGAGGU | AGCACGUGCCCUGGUUCUCCA | 2     | no apical meristem gynoecium development                                         |
| vvi-miR164d-5p | VIT_219s0027g00230 | 2                      | ACGUGCACGGGACGAAGAGGU | AGCAAGUGCCCUGCUUCUCCG | 2.5   | nac domain protein regulation of transcription                                   |
| vvi-miR166a-3p | VIT_218s0075g00480 | 7                      | CCUUACUUCGGACCAGGCUCU | GGAAUGAAGUAUGGUCCGAGA | 2.5   | tmv resistance protein n-like defense response                                   |
| vvi-miR166a-5p | VIT_214s0060g01210 | 1                      | CUAGAACCUAGUUUGGAGUAA | GAUUUUGGAUAAAACCAU    | 2.5   | bzip transcription factor positive regulation of seed maturation                 |
| vvi-miR166b-5p | VIT_209s0002g03740 | 1                      | CUCCUUACUUCGGACCAGGCU | CUGGAAUGAAGCCUGGUCCGG | 2.5   | homeobox-leucine zipper protein athb-dd cellular response to nitrogen starvation |
| vvi-miR166c-3p | VIT_209s0002g03740 | 1                      | CCCCUUACUUCGGACCAGGCU | CUGGAAUGAAGCCUGGUCCGG | 2.5   | homeobox-leucine zipper protein athb-dd cellular response to nitrogen starvation |
| vvi-miR166c-5p | VIT_214s0108g00480 | 4                      | GGAGCUCGGUCUGUUGUAAGG | CCUUGAGCUGGGCAACAUUCU | 2.5   | transcription factor bhlhdd cellular response to iron ion starvation             |
| vvi-miR166d-3p | VIT_209s0002g03740 | 1                      | CCCCUUACUUCGGACCAGGCU | CUGGAAUGAAGCCUGGUCCGG | 2.5   | homeobox-leucine zipper protein athb-dd cellular response to nitrogen starvation |
| vvi-miR166e-3p | VIT_209s0002g03740 | 1                      | CCCCUUACUUCGGACCAGGCU | CUGGAAUGAAGCCUGGUCCGG | 2.5   | homeobox-leucine zipper protein athb-dd cellular response to nitrogen starvation |
| vvi-miR166e-5p | VIT_214s0108g00480 | 4                      | GGAGCUCGGUCUGUUGUAAGG | CCUUGAGCUGGGCAACAUUCU | 2.5   | transcription factor bhlhdd cellular response to iron ion starvation             |
| vvi-miR166f-3p | VIT_209s0002g03740 | 1                      | CCCCUUACUUCGGACCAGGCU | CUGGAAUGAAGCCUGGUCCGG | 2.5   | homeobox-leucine zipper protein athb-dd cellular response to nitrogen starvation |
| vvi-miR166g-3p | VIT_209s0002g03740 | 1                      | CCCCUUACUUCGGACCAGGCU | CUGGAAUGAAGCCUGGUCCGG | 2.5   | homeobox-leucine zipper protein athb-dd cellular response to nitrogen starvation |
| vvi-miR166g-5p | VIT_205s0102g00770 | 2                      | AGAGCUUGGUCUGUUGUAAGG | UCUCGAACCAGAUAACUGUCC | 2.5   | lipid binding nucleus                                                            |
| vvi-miR166h-3p | VIT_209s0002g03740 | 1                      | CCCCUUACUUCGGACCAGGCU | CUGGAAUGAAGCCUGGUCCGG | 2.5   | homeobox-leucine zipper protein athb-dd cellular response to nitrogen starvation |
| vvi-miR167b-5p | VIT_206s0080g00260 | 1                      | UCUAGUACGACCGUCGAAGU  | AGAUCAUGCU-GCAGCUGCA  | 2.5   | poly protein ADP-ribosylation                                                    |
| vvi-miR167b-5p | VIT_208s0007g02340 | 2                      | UCUAGUACGACCGUCGAAGU  | AGAUUAUGCUGGCUGCUUCA  | 1.5   | protein cytosol                                                                  |
| vvi-miR167d-5p | VIT_206s0080g00260 | 1                      | UCUAGUACGACCGUCGAAGU  | AGAUCAUGCU-GCAGCUGCA  | 2.5   | poly protein ADP-ribosylation                                                    |
| vvi-miR167d-5p | VIT_208s0007g02340 | 2                      | UCUAGUACGACCGUCGAAGU  | AGAUUAUGCUGGCUGCUUCA  | 1.5   | protein cytosol                                                                  |
| vvi-miR167e-5p | VIT_206s0080g00260 | 1                      | UCUAGUACGACCGUCGAAGU  | AGAUCAUGCU-GCAGCUGCA  | 2.5   | poly protein ADP-ribosylation                                                    |
| vvi-miR167e-5p | VIT_208s0007g02340 | 2                      | UCUAGUACGACCGUCGAAGU  | AGAUUAUGCUGGCUGCUUCA  | 1.5   | protein cytosol                                                                  |



| miRNA name     | Target gene        | Number of target sites | miRNA sequence        | Target sequence       | Score | Target annotation                                                                                        |
|----------------|--------------------|------------------------|-----------------------|-----------------------|-------|----------------------------------------------------------------------------------------------------------|
| vvi-miR168-3p  | VIT_208s0007g07890 | 1                      | UAAGUCAACUACGUUCCGCC  | GUUUAGGUGAUGCAAGCGGG  | 2     | pentatricopeptide repeat-containing protein mitochondrial-like exo-poly-alpha-galacturonosidase activity |
| vvi-miR169e-5p | VIT_200s0125g00290 | 1                      | UCCGUUCAGUAGGAACCGAU  | GGGUAAGUUGUCCUUGGCUG  | 2.5   | protein regulation of meristem growth                                                                    |
| vvi-miR169e-5p | VIT_201s0146g00380 | 2                      | UCCGUUCAGUAGGAACCGAU  | AGGCAAGUCAUCCUUCGCUA  | 1     | litaf-domain-containing protein response to absence of light                                             |
| vvi-miR169e-5p | VIT_208s0007g08250 | 14                     | UCCGUUCAGUAGGAACCGAU  | AGGCAAAUCAUUCUUGGCUU  | 2.5   | nuclear transcription factor y subunit a- regulation of transcription                                    |
| vvi-miR169e-5p | VIT_209s0002g01590 | 3                      | UCCGUUCAGUAGGAACCGAU  | UGGAAAGUCAUCCUUGGCUG  | 2.5   | nuclear transcription factor y subunit a-3 regulation of transcription                                   |
| vvi-miR169e-5p | VIT_211s0016g01480 | 4                      | UCCGUUCAGUAGGAACCGAU  | GGGCAAUUAUCCUUGGCUU   | 2.5   | nuclear transcription factor y subunit a- regulation of transcription                                    |
| vvi-miR169e-5p | VIT_213s0064g00860 | 3                      | UCCGUUCAGUAGGAACCGAU  | AGGCAAUUAUUCUUGGCUU   | 2.5   | nuclear transcription factor y subunit a- regulation of transcription                                    |
| vvi-miR169g-5p | VIT_209s0002g01590 | 3                      | AGCCGUUCAGUAGGAACCGAC | UUGGAAAGUCAUCCUUGGCUG | 1.5   | nuclear transcription factor y subunit a-3 regulation of transcription                                   |
| vvi-miR169r-3p | VIT_216s0050g00390 | 1                      | UGACUCAGUUCAGUUGAACGG | ACUGAGUCAACUCAACUUGGC | 2     | amp dependent cytosol                                                                                    |
| vvi-miR169r-5p | VIT_208s0032g01190 | 1                      | GCCGUUCAGUAGGAACUGAGU | UGGUAAUUAUCCUUGGCUCA  | 2.5   | nuclear transcription factor y subunit a-dd regulation of transcription                                  |
| vvi-miR169r-5p | VIT_211s0016g00450 | 1                      | GCCGUUCAGUAGGAACUGAGU | GGACAAGUCAUUCUUGACUCA | 2.5   | eukaryotic translation initiation factor 3 subunit k eukaryotic translation initiation factor 3 complex  |
| vvi-miR169t-3p | VIT_216s0050g00390 | 1                      | UGACUCAGUUCAGUUGAACGG | ACUGAGUCAACUCAACUUGGC | 2     | amp dependent cytosol                                                                                    |
| vvi-miR171b-3p | VIT_202s0154g00400 | 1                      | CCUCUAUAACUGCGCCGAGUU | AGGGAAUUGGCGCGGCUCAA  | 2     | gras family transcription factor regulation of transcription                                             |
| vvi-miR171b-3p | VIT_204s0023g01380 | 1                      | CCUCUAUAACUGCGCCGAGUU | GGCGAAUUGGCGCGGCUCAA  | 1.5   | gras family transcription factor regulation of shoot system development                                  |
| vvi-miR171b-3p | VIT_215s0048g00270 | 1                      | CCUCUAUAACUGCGCCGAGUU | AGGGAAUUGGCGCGGCUCAA  | 2     | gras family transcription factor regulation of transcription                                             |
| vvi-miR171b-3p | VIT_217s0000g09495 | 1                      | CCUCUAUAACUGCGCCGAGUU | UGAGAAUUGACGAGGCUUAA  | 2.5   | serine-threonine protein plant- protein phosphorylation                                                  |
| vvi-miR171i-3p | VIT_202s0154g00400 | 1                      | CUAUAACCGUGCCGAGUUAGU | GAUAUUGGCGCGGCUCAAUCA | 0.5   | gras family transcription factor regulation of transcription                                             |
| vvi-miR171i-3p | VIT_204s0023g01380 | 1                      | CUAUAACCGUGCCGAGUUAGU | GAUAUUGGCGCGGCUCAAUCA | 0.5   | gras family transcription factor regulation of shoot system development                                  |
| vvi-miR171i-3p | VIT_212s0059g00650 | 1                      | CUAUAACCGUGCCGAGUUAGU | GAUAUUGGUGCGGUUCAUAA  | 2.5   | hypothetical protein                                                                                     |
| vvi-miR171i-3p | VIT_214s0068g01780 | 1                      | CUAUAACCGUGCCGAGUUAGU | GAUAUUGGCACGCGUCAAUCA | 0     | squamosa promoter-binding-like protein 16-like nucleus                                                   |
| vvi-miR171i-3p | VIT_215s0048g00270 | 1                      | CUAUAACCGUGCCGAGUUAGU | GAUAUUGGCGCGGCUCAAUCA | 0.5   | gras family transcription factor regulation of transcription                                             |
| vvi-miR171i-3p | VIT_217s0000g01250 | 1                      | CUAUAACCGUGCCGAGUUAGU | GAUAUUGGCACGCGUCAAUCA | 0     | protein protein binding                                                                                  |

| miRNA name     | Target gene        | Number of target sites | miRNA sequence        | Target sequence        | Score | Target annotation                                                                     |
|----------------|--------------------|------------------------|-----------------------|------------------------|-------|---------------------------------------------------------------------------------------|
| vvi-miR172d-3p | VIT_203s0038g03920 | 2                      | CGUCGUAGUAGUUCUAAGAGU | GCAGCACCAUCAAA-AUUCUCA | 2.5   | glutamate receptor extracellular-glutamate-gated ion channel activity                 |
| vvi-miR172d-3p | VIT_206s0004g03590 | 3                      | CGUCGUAGUAGUUCUAAGAGU | GCAGCAUCAUCAGGAUUCUCA  | 0.5   | AP2/ERF domain ethylene-responsive transcription factor rap2-7-like                   |
| vvi-miR172d-3p | VIT_206s0061g00290 | 1                      | CGUCGUAGUAGUUCUAAGAGU | GUAGCAUCAUCAAGAUUCACA  | 1.5   | hypothetical protein                                                                  |
| vvi-miR172d-3p | VIT_207s0031g00220 | 3                      | CGUCGUAGUAGUUCUAAGAGU | GCAGCAUCAUCAGGAUUCCCA  | 1.5   | transcription factor apetala2 seed development                                        |
| vvi-miR172d-3p | VIT_208s0040g03180 | 1                      | CGUCGUAGUAGUUCUAAGAGU | GCAGCAUCAUCAGGAUUCUUG  | 1.5   | ap2 domain-containing transcription factor oxidation-reduction process                |
| vvi-miR172d-3p | VIT_209s0018g01300 | 1                      | CGUCGUAGUAGUUCUAAGAGU | GCAGCAUCAUCAAGAAUCGCA  | 2     | uncharacterized protein protein heterodimerization activity                           |
| vvi-miR172d-3p | VIT_213s0019g03550 | 2                      | CGUCGUAGUAGUUCUAAGAGU | GCAGCAUCAUCAGGAUUCCCU  | 2.5   | ap2 domain-containing transcription factor oxidation-reduction process                |
| vvi-miR2111-3p | VIT_208s0007g01270 | 1                      | UCAUUAGACGUUGGUCUCCUG | AGUAAUCUGCAACCAGAGGAC  | 0     | dynein light chain flagellar outer arm Rho guanyl-nucleotide exchange factor activity |
| vvi-miR2111-3p | VIT_209s0002g02550 | 6                      | UCAUUAGACGUUGGUCUCCUG | AGUAAU-UGCAACCAGAGGAU  | 2     | hypothetical protein                                                                  |
| vvi-miR2111-3p | VIT_210s0071g00980 | 3                      | UCAUUAGACGUUGGUCUCCUG | AGUAAUCAGCAAGCAGAGGAU  | 2.5   | uncharacterized protein protein desumoylation                                         |
| vvi-miR2111-5p | VIT_208s0007g01270 | 1                      | AUCUGGAGUCCUACGUCUAAU | UAGACCUCAGGAUGCAGAUUA  | 0     | dynein light chain flagellar outer arm Rho guanyl-nucleotide exchange factor activity |
| vvi-miR2950-5p | VIT_204s0008g03190 | 1                      | AGGUCACACGUUCUCUACCUU | UUCAGUGUGCAAAAAGAUGGAA | 1.5   | hypothetical protein                                                                  |
| vvi-miR2950-5p | VIT_206s0004g00860 | 1                      | AGGUCACACGUUCUCUACCUU | UCUAGUUUGCAAGAGAUGGCA  | 2.5   | f-box kelch-repeat protein cytoplasm                                                  |
| vvi-miR2950-5p | VIT_213s0158g00130 | 1                      | AGGUCACACGUUCUCUACCUU | UCCAGUGUG-AAGACAUGGAA  | 2.5   | lactoylglutathione lyase cytoplasm                                                    |
| vvi-miR2950-5p | VIT_219s0014g01860 | 6                      | AGGUCACACGUUCUCUACCUU | UCCAGUGUGCAAAAAGAUGGGA | 1.5   | rna exonuclease 4-like nucleic acid binding                                           |
| vvi-miR319b-3p | VIT_202s0025g00870 | 1                      | CCCUCGAGGGAAGUCAGGUU  | GGGAGCUCCCUUCACUGCAA   | 2     | hypothetical protein                                                                  |
| vvi-miR319b-3p | VIT_211s0016g05010 | 1                      | CCCUCGAGGGAAGUCAGGUU  | AGGAGCUCCCUUCAGUCCAA   | 1     | metallothiol transferase fobS cytoplasm                                               |
| vvi-miR319b-3p | VIT_213s0067g01630 | 1                      | CCCUCGAGGGAAGUCAGGUU  | UGGAGCUCCCUUCACUCCAA   | 2     | transcription factor gamyb-like flower development                                    |
| vvi-miR319c-3p | VIT_202s0025g00870 | 1                      | CCCUCGAGGGAAGUCAGGUU  | GGGAGCUCCCUUCACUGCAA   | 2     | hypothetical protein                                                                  |
| vvi-miR319c-3p | VIT_211s0016g05010 | 1                      | CCCUCGAGGGAAGUCAGGUU  | AGGAGCUCCCUUCAGUCCAA   | 1     | metallothiol transferase fobS cytoplasm                                               |
| vvi-miR319c-3p | VIT_213s0067g01630 | 1                      | CCCUCGAGGGAAGUCAGGUU  | UGGAGCUCCCUUCACUCCAA   | 2     | transcription factor gamyb-like flower development                                    |
| vvi-miR319c-5p | VIT_200s0566g00010 | 1                      | CUCACCUGACUUCUUUCGAGA | GAGUCGACUCAAGAAAGCUCU  | 2     | upf03dd protein chloroplastic-like peroxiredoxin activity                             |
| vvi-miR319c-5p | VIT_200s1308g00020 | 3                      | CUCACCUGACUUCUUUCGAGA | GAGUCGACUCAAGAAAGCUCU  | 2     | upf03dd protein chloroplastic-like peroxiredoxin activity                             |
| vvi-miR319e-3p | VIT_211s0016g05010 | 1                      | UCCUCGAGGGAAGUCAGGUU  | AGGAGCUCCCUUCAGUCCAA   | 0     | metallothiol transferase fobS cytoplasm                                               |

| miRNA name      | Target gene        | Number of target sites | miRNA sequence         | Target sequence        | Score | Target annotation                                                                                    |
|-----------------|--------------------|------------------------|------------------------|------------------------|-------|------------------------------------------------------------------------------------------------------|
| vvi-miR319f-3p  | VIT_202s0025g00870 | 1                      | CCCUCGAGGGAAGUCAGGUU   | GGGAGCUCCCUUCACUGCAA   | 2     | hypothetical protein                                                                                 |
| vvi-miR319f-3p  | VIT_211s0016g05010 | 1                      | CCCUCGAGGGAAGUCAGGUU   | AGGAGCUCCCUUCAGUCCAA   | 1     | metallothiol transferase fobp cytoplasm                                                              |
| vvi-miR319f-3p  | VIT_213s0067g01630 | 1                      | CCCUCGAGGGAAGUCAGGUU   | UGGAGCUCCCUUCACUCCAA   | 2     | transcription factor gamyb-like flower development                                                   |
| vvi-miR319g-3p  | VIT_202s0025g00870 | 1                      | CCCUCGAGGGAAGUCAGGUU   | GGGAGCUCCCUUCACUGCAA   | 2     | hypothetical protein                                                                                 |
| vvi-miR319g-3p  | VIT_211s0016g05010 | 1                      | CCCUCGAGGGAAGUCAGGUU   | AGGAGCUCCCUUCAGUCCAA   | 1     | metallothiol transferase fobp cytoplasm                                                              |
| vvi-miR319g-3p  | VIT_213s0067g01630 | 1                      | CCCUCGAGGGAAGUCAGGUU   | UGGAGCUCCCUUCACUCCAA   | 2     | transcription factor gamyb-like flower development                                                   |
| vvi-miR3623-5p  | VIT_200s0288g00010 | 1                      | ACCACGAACCUACUUGAACACU | UGGUGCUUGGAUGAGCUUGAUA | 2.5   | tmv resistance protein n-like defense response                                                       |
| vvi-miR3623-5p  | VIT_200s0288g00040 | 1                      | ACCACGAACCUACUUGAACACU | UGGUGCUUGGAUGAGCUUGAUA | 2.5   | tmv resistance protein n-like defense response                                                       |
| vvi-miR3623-5p  | VIT_218s0001g06340 | 1                      | ACCACGAACCUACUUGAACACU | UGGUGCUUGGAGGAGCUUGUGA | 2.5   | tmv resistance protein n-like defense response                                                       |
| vvi-miR3623-5p  | VIT_218s0041g01620 | 1                      | ACCACGAACCUACUUGAACACU | UGGUGCUUGGAUGAACUCGUCA | 2     | tmv resistance protein n-like defense response                                                       |
| vvi-miR3623-5p  | VIT_218s0041g01650 | 1                      | ACCACGAACCUACUUGAACACU | UGGUGCUUGGAUGAACUCGUCA | 2     | tmv resistance protein n-like defense response                                                       |
| vvi-miR3623-5p  | VIT_218s0041g02180 | 2                      | ACCACGAACCUACUUGAACACU | UGGUGCUUGGAGGAGCUUGUGA | 1.5   | protein da1-related 1-like ovule morphogenesis                                                       |
| vvi-miR3627-5p  | VIT_211s0052g00320 | 6                      | UCACGGCAGAGAGGACGCUGUU | GGUGUCAUCUCUCCUGCGACAG | 2.5   | calcium-transporting atpase plasma membrane-type-like inflorescence morphogenesis                    |
| vvi-miR3629a-3p | VIT_200s0198g00160 | 1                      | GGAUGUAAAAGAGUCGUCGGU  | CCAAUAAUUUCUCAACAGCCA  | 2.5   | chromosome transmission fidelity protein dd homolog nucleoside-triphosphatase activity               |
| vvi-miR3629a-3p | VIT_201s0011g04410 | 1                      | GGAUGUAAAAGAGUCGUCGGU  | CCUACAUUUUGUCGGCAGCCA  | 1.5   | sec-independent protein translocase protein abscisic acid                                            |
| vvi-miR3629a-3p | VIT_201s0127g00895 | 1                      | GGAUGUAAAAGAGUCGUCGGU  | CCUACAUUUUCUCAGUAACCA  | 1.5   | endoplasmic oxidoreductin-1 endoplasmic reticulum membrane                                           |
| vvi-miR3629a-3p | VIT_203s0091g01030 | 2                      | GGAUGUAAAAGAGUCGUCGGU  | CCUACGUUUUCUCAGCAACCA  | 2.5   | telomere repeat binding factor 1 glucuronoxylan                                                      |
| vvi-miR3629a-3p | VIT_204s0008g04480 | 2                      | GGAUGUAAAAGAGUCGUCGGU  | CCUACAUUUU-UCAGCAACCA  | 2.5   | ring finger and chy zinc finger domain-containing protein nucleus                                    |
| vvi-miR3629a-3p | VIT_204s0008g04490 | 1                      | GGAUGUAAAAGAGUCGUCGGU  | CCUACGUUUUCUCAGCGGCCA  | 1     | hypothetical protein                                                                                 |
| vvi-miR3629a-3p | VIT_204s0044g01620 | 3                      | GGAUGUAAAAGAGUCGUCGGU  | CUUAUAAUUUCUAGCAGCCA   | 1.5   | copine (calcium-dependent phospholipid-binding protein) family zinc ion binding                      |
| vvi-miR3629a-3p | VIT_206s0004g00450 | 2                      | GGAUGUAAAAGAGUCGUCGGU  | UCUACAUUUUCUCAGCAGCCA  | 0.5   | rna polymerase ii transcription mediator regulation of transcription from RNA polymerase II promoter |
| vvi-miR3629a-3p | VIT_207s0031g01230 | 2                      | GGAUGUAAAAGAGUCGUCGGU  | UCCUCAUUUUCUCAGCAGCCA  | 2.5   | 60s ribosomal protein ldd structural constituent of ribosome                                         |
| vvi-miR3629a-3p | VIT_208s0007g06820 | 1                      | GGAUGUAAAAGAGUCGUCGGU  | CCUACAUUUUCUGGUAGACA   | 2     | kinesin motor protein microtubule-based movement                                                     |
| vvi-miR3629a-3p | VIT_208s0007g06820 | 2                      | GGAUGUAAAAGAGUCGUCGGU  | GCUGCAUUUUCUCAGCAACCA  | 2.5   | kinesin motor protein microtubule-based movement                                                     |
| vvi-miR3629a-3p | VIT_209s0002g03240 | 5                      | GGAUGUAAAAGAGUCGUCGGU  | UCUACACUUUCUCAGCAACCA  | 2.5   | uncharacterized protein mitochondrion                                                                |
| vvi-miR3629a-3p | VIT_209s0054g00440 | 1                      | GGAUGUAAAAGAGUCGUCGGU  | CCUCAUUUUCUCAGCAGCCA   | 2     | gata transcription factor dd sequence-specific DNA binding transcription factor activity             |

| miRNA name      | Target gene        | Number of target sites | miRNA sequence        | Target sequence       | Score | Target annotation                                                                                                                           |
|-----------------|--------------------|------------------------|-----------------------|-----------------------|-------|---------------------------------------------------------------------------------------------------------------------------------------------|
| vvi-miR3629a-3p | VIT_211s0016g03380 | 1                      | GGAUGUAAAAGAGUCGUCGGU | CCUGCACUUUCUCAGCAACCA | 2.5   | probable glycosyltransferase at5g03795-like glucuronosyl-N-acetylglucosaminyl-proteoglycan 4-alpha-N-acetylglucosaminyltransferase activity |
| vvi-miR3629a-3p | VIT_211s0016g04820 | 5                      | GGAUGUAAAAGAGUCGUCGGU | CCGACAUUUUCUCAGCAGCCA | 1     | tudor-like rna-binding protein RNA binding                                                                                                  |
| vvi-miR3629a-3p | VIT_211s0065g00340 | 2                      | GGAUGUAAAAGAGUCGUCGGU | UCCACAUUUUCUCAGCAGCCA | 1.5   | hua enhancer 2 sugar mediated signaling pathway                                                                                             |
| vvi-miR3629a-3p | VIT_212s0035g01020 | 1                      | GGAUGUAAAAGAGUCGUCGGU | CUUACUUUUUCUCAGCAGCCG | 2     | 60s ribosomal protein nucleolus                                                                                                             |
| vvi-miR3629a-3p | VIT_213s0019g04380 | 1                      | GGAUGUAAAAGAGUCGUCGGU | UCUACAUUUUCUUGGCACCCA | 2.5   | protein developmental growth                                                                                                                |
| vvi-miR3629a-3p | VIT_213s0047g01200 | 1                      | GGAUGUAAAAGAGUCGUCGGU | CCUCCAUUUUCUCAGCAACCA | 2     | obtusifoliol 14alpha-demethylase methionine                                                                                                 |
| vvi-miR3629a-3p | VIT_213s0064g00580 | 4                      | GGAUGUAAAAGAGUCGUCGGU | CCUACAUUUUCUCGGCAGCCA | 0.5   | dd kda peptidyl-prolyl isomerase protein folding                                                                                            |
| vvi-miR3629a-3p | VIT_213s0073g00550 | 1                      | GGAUGUAAAAGAGUCGUCGGU | CCUGCAUUUUCUCAGCAACUA | 2     | lysosomal beta glucosidase-like anchored to membrane                                                                                        |
| vvi-miR3629a-3p | VIT_214s0060g01430 | 3                      | GGAUGUAAAAGAGUCGUCGGU | UUUAUAUUUUCUCAGCAGCCA | 1.5   | uncharacterized protein single-organism cellular process                                                                                    |
| vvi-miR3629a-3p | VIT_214s0060g01580 | 1                      | GGAUGUAAAAGAGUCGUCGGU | CCUGCAUUUUCUCGGCAACCG | 2.5   | protein plasma membrane                                                                                                                     |
| vvi-miR3629a-3p | VIT_214s0066g00830 | 2                      | GGAUGUAAAAGAGUCGUCGGU | CCUGCAUUUUCUCACCAACCA | 2.5   | sirohdrochlorin ferrochelatase metal ion binding                                                                                            |
| vvi-miR3629a-3p | VIT_215s0046g03190 | 1                      | GGAUGUAAAAGAGUCGUCGGU | CCUGCAUUUUCUCAGCUGCCA | 1.5   | r2r3-myb transcription response to jasmonic acid stimulus                                                                                   |
| vvi-miR3629a-3p | VIT_216s0039g01420 | 1                      | GGAUGUAAAAGAGUCGUCGGU | CCUCCAUUUUCUUGGCAGCCA | 2     | nucleotide-diphospho-sugar transferases superfamily protein pollen germination                                                              |
| vvi-miR3629a-3p | VIT_216s0039g02430 | 2                      | GGAUGUAAAAGAGUCGUCGGU | CCUGCAAUUUCUCAGCAACCA | 2.5   | uncharacterized protein single-organism cellular process                                                                                    |
| vvi-miR3629a-3p | VIT_216s0050g01780 | 1                      | GGAUGUAAAAGAGUCGUCGGU | CUUCCAUUUUCUCAGCGGCCA | 2     | probable membrane-associated kinase regulator 2-like response to stimulus                                                                   |
| vvi-miR3629a-3p | VIT_216s0098g01870 | 6                      | GGAUGUAAAAGAGUCGUCGGU | CCUACAUUUUUUCAGCAGCCA | 0.5   | calcineurin b-like protein 4 hypotonic salinity response                                                                                    |
| vvi-miR3629a-3p | VIT_216s0098g01880 | 3                      | GGAUGUAAAAGAGUCGUCGGU | CCUACAUUUUCUAAGCAACCA | 2     | dipeptidyl peptidase cytosol                                                                                                                |
| vvi-miR3629a-3p | VIT_217s0000g01150 | 1                      | GGAUGUAAAAGAGUCGUCGGU | CCUACAUUUUCUCAGCAGCCA | 0     | curved dna-binding protein protein folding                                                                                                  |
| vvi-miR3629a-5p | VIT_203s0038g02970 | 2                      | GAACCGACGACUCUUUACGC  | UUUGGUUGCUGAGAAAUGCA  | 2     | serine threonine-protein kinase atr-like telomere maintenance in response to DNA damage                                                     |
| vvi-miR3629a-5p | VIT_204s0008g02000 | 1                      | GAACCGACGACUCUUUACGC  | UUUGGUUGCUGAGAAAAGGCG | 2     | uncharacterized protein nucleus                                                                                                             |
| vvi-miR3629a-5p | VIT_205s0020g02030 | 2                      | GAACCGACGACUCUUUACGC  | UUUGGUUGCUGAGAUAAUGCG | 2     | dehydroquinatase dehydratase shikimate dehydrogenase cytosol                                                                                |
| vvi-miR3629a-5p | VIT_206s0061g00700 | 1                      | GAACCGACGACUCUUUACGC  | UUUGGGUGCUGAGAAAUGCG  | 1.5   | auxin-regulated expressed plasma membrane                                                                                                   |

| miRNA name      | Target gene        | Number of target sites | miRNA sequence        | Target sequence       | Score | Target annotation                                                                      |
|-----------------|--------------------|------------------------|-----------------------|-----------------------|-------|----------------------------------------------------------------------------------------|
| vvi-miR3629a-5p | VIT_207s0104g00880 | 2                      | GAACCGACGACUCUUUACGC  | UUUGGCUGCUGAGAAACUGUG | 2     | histidine phosphotransfer protein cytoplasm                                            |
| vvi-miR3629a-5p | VIT_210s0003g02690 | 3                      | GAACCGACGACUCUUUACGC  | UUUGGUUGCUGAGAAAACGUG | 2.5   | scp1-like small phosphatase 4b CTD phosphatase activity                                |
| vvi-miR3629a-5p | VIT_211s0103g00550 | 4                      | GAACCGACGACUCUUUACGC  | UUUGGUUGGUGAGAAAUGUG  | 2.5   | subtilisin-like protease-like plant extracellular matrix                               |
| vvi-miR3629a-5p | VIT_212s0059g00900 | 2                      | GAACCGACGACUCUUUACGC  | UUUGGUUGCUGAGAAAUGGG  | 2     | hypothetical protein                                                                   |
| vvi-miR3629a-5p | VIT_212s0059g00920 | 1                      | GAACCGACGACUCUUUACGC  | UUUGGUUGCUGAGAAAUGGG  | 2     | pentatricopeptide repeat-containing protein mitochondrion                              |
| vvi-miR3629a-5p | VIT_212s0059g01160 | 1                      | GAACCGACGACUCUUUACGC  | UUUGGUUGCUGAGAAAGUGCU | 2.5   | cupin-like protein                                                                     |
| vvi-miR3629a-5p | VIT_213s0064g01230 | 2                      | GAACCGACGACUCUUUACGC  | UUUGGCUGCUGAGAAAUGCA  | 2.5   | u6 snrna-associated sm-like protein lsm7 nucleus                                       |
| vvi-miR3629a-5p | VIT_214s0030g01280 | 1                      | GAACCGACGACUCUUUACGC  | UUUGGUUGCUGAGAAAUGCG  | 1     | double-stranded rna-binding protein 2-like RNA binding                                 |
| vvi-miR3629a-5p | VIT_214s0060g01580 | 1                      | GAACCGACGACUCUUUACGC  | UUUGGUUGCUGAGAAAUGUG  | 1.5   | protein plasma membrane                                                                |
| vvi-miR3629a-5p | VIT_215s0021g00090 | 1                      | GAACCGACGACUCUUUACGC  | UUUGGUUGCUGAGAAAUGCA  | 2     | sister chromatid cohesion protein dcc1-like nucleus                                    |
| vvi-miR3629a-5p | VIT_215s0024g00820 | 1                      | GAACCGACGACUCUUUACGC  | UUUGGCUGCUGAGAAAUGUG  | 1     | protein response to abscisic acid stimulus                                             |
| vvi-miR3629a-5p | VIT_216s0050g02440 | 2                      | GAACCGACGACUCUUUACGC  | UUUGGUUGCUGAGAAAGUGUG | 2     | protein dimerization DNA binding                                                       |
| vvi-miR3629a-5p | VIT_217s0000g01160 | 2                      | GAACCGACGACUCUUUACGC  | UUUGGUUGCUGAGAAAAGGUG | 2.5   | nodulin-like protein mitochondrion                                                     |
| vvi-miR3629a-5p | VIT_217s0000g01860 | 1                      | GAACCGACGACUCUUUACGC  | UUUGGUUGCUGAUAAAUGUG  | 2.5   | gaga-binding transcriptional activator glucan endo-1                                   |
| vvi-miR3629a-5p | VIT_217s0000g05820 | 1                      | GAACCGACGACUCUUUACGC  | UUUGGUUGCUGAGAAAUGUG  | 1.5   | ubiquitin-conjugating enzyme negative regulation of flower development                 |
| vvi-miR3629a-5p | VIT_217s0000g06880 | 2                      | GAACCGACGACUCUUUACGC  | UUUGGUUGCUGAGAAAGUGUG | 2     | heparanase-like protein 1-like plant-type cell wall                                    |
| vvi-miR3629a-5p | VIT_218s0001g14070 | 5                      | GAACCGACGACUCUUUACGC  | CAUGGCUGCUGGGAAAGUGUG | 2.5   | hypothetical protein                                                                   |
| vvi-miR3629a-5p | VIT_219s0014g02260 | 1                      | GAACCGACGACUCUUUACGC  | UUUGGUUGCUGAGAAAUGUG  | 2.5   | hypothetical protein                                                                   |
| vvi-miR3629a-5p | VIT_219s0090g00630 | 5                      | GAACCGACGACUCUUUACGC  | UUUGGUUGCUGAGAAAUGCU  | 2     | tetraacyldisaccharide 4 -kinase family protein lipid A                                 |
| vvi-miR3629a-5p | VIT_219s0090g01230 | 3                      | GAACCGACGACUCUUUACGC  | CUUGGCUGCUAACAAAUGCG  | 2     | microtubule-associated proteins 65-1 cortical microtubule organization                 |
| vvi-miR3629a-5p | VIT_219s0090g01230 | 3                      | GAACCGACGACUCUUUACGC  | UUUGGCUGCUGAGAAAUGUG  | 1     | microtubule-associated proteins 65-1 cortical microtubule organization                 |
| vvi-miR3629a-5p | VIT_219s0090g01230 | 3                      | GAACCGACGACUCUUUACGC  | UUUGGUUGCUGAGAAAUGCA  | 2     | microtubule-associated proteins 65-1 cortical microtubule organization                 |
| vvi-miR3629c-5p | VIT_200s0198g00160 | 1                      | GGAUGUAAAAGAGUCGUCGGU | CCAAUAUUUUCUCAACAGCCA | 2.5   | chromosome transmission fidelity protein dd homolog nucleoside-triphosphatase activity |
| vvi-miR3629c-5p | VIT_201s0011g04410 | 1                      | GGAUGUAAAAGAGUCGUCGGU | CCUACAUUUUGUCGGCAGCCA | 1.5   | sec-independent protein translocase protein abscisic acid                              |
| vvi-miR3629c-5p | VIT_201s0127g00895 | 1                      | GGAUGUAAAAGAGUCGUCGGU | CCUACAUUUUCAGUAACCA   | 1.5   | endoplasmic oxidoreductin-1 endoplasmic reticulum membrane                             |

| miRNA name      | Target gene        | Number of target sites | miRNA sequence        | Target sequence        | Score | Target annotation                                                                                                                           |
|-----------------|--------------------|------------------------|-----------------------|------------------------|-------|---------------------------------------------------------------------------------------------------------------------------------------------|
| vvi-miR3629c-5p | VIT_203s0091g01030 | 2                      | GGAUGUAAAAGAGUCGUCGGU | CCUACGUUUUCUCUGCAACCA  | 2.5   | telomere repeat binding factor 1 glucuronoxylan                                                                                             |
| vvi-miR3629c-5p | VIT_204s0008g04480 | 2                      | GGAUGUAAAAGAGUCGUCGGU | CCUACAUUUU-UCAGCAACCA  | 2.5   | ring finger and chy zinc finger domain-containing protein nucleus                                                                           |
| vvi-miR3629c-5p | VIT_204s0008g04490 | 1                      | GGAUGUAAAAGAGUCGUCGGU | CCUACGUUUUCUCAGCGGCCA  | 1     | hypothetical protein                                                                                                                        |
| vvi-miR3629c-5p | VIT_204s0044g01620 | 3                      | GGAUGUAAAAGAGUCGUCGGU | CUUAUAUUUUUCUAGCAGCCA  | 1.5   | copine (calcium-dependent phospholipid-binding protein) family zinc ion binding                                                             |
| vvi-miR3629c-5p | VIT_206s0004g00450 | 2                      | GGAUGUAAAAGAGUCGUCGGU | UCUACAUUUUUCUCAGCAGCCA | 0.5   | rna polymerase ii transcription mediator regulation of transcription from RNA polymerase II promoter                                        |
| vvi-miR3629c-5p | VIT_207s0031g01230 | 2                      | GGAUGUAAAAGAGUCGUCGGU | UCCUCAUUUUUCUCAGCAGCCA | 2.5   | 60s ribosomal protein ldd structural constituent of ribosome                                                                                |
| vvi-miR3629c-5p | VIT_208s0007g06820 | 1                      | GGAUGUAAAAGAGUCGUCGGU | CCUACAUUUUUCUGGUAGACA  | 2     | kinesin motor protein microtubule-based movement                                                                                            |
| vvi-miR3629c-5p | VIT_208s0007g06820 | 2                      | GGAUGUAAAAGAGUCGUCGGU | GCUGCAUUUUUCUCAGCAACCA | 2.5   | kinesin motor protein microtubule-based movement                                                                                            |
| vvi-miR3629c-5p | VIT_209s0002g03240 | 5                      | GGAUGUAAAAGAGUCGUCGGU | UCUACACUUUCUCAGCAACCA  | 2.5   | uncharacterized protein mitochondrion                                                                                                       |
| vvi-miR3629c-5p | VIT_209s0054g00440 | 1                      | GGAUGUAAAAGAGUCGUCGGU | CCUCAUUUUUCUCAGCAGCCA  | 2     | gata transcription factor dd sequence-specific DNA binding transcription factor activity                                                    |
| vvi-miR3629c-5p | VIT_211s0016g03380 | 1                      | GGAUGUAAAAGAGUCGUCGGU | CCUGCACUUUCUCAGCAACCA  | 2.5   | probable glycosyltransferase at5g03795-like glucuronosyl-N-acetylglucosaminyl-proteoglycan 4-alpha-N-acetylglucosaminyltransferase activity |
| vvi-miR3629c-5p | VIT_211s0016g04820 | 5                      | GGAUGUAAAAGAGUCGUCGGU | CCGACAUUUUUCUCAGCAGCCA | 1     | tudor-like rna-binding protein RNA binding                                                                                                  |
| vvi-miR3629c-5p | VIT_211s0065g00340 | 2                      | GGAUGUAAAAGAGUCGUCGGU | UCCACAUUUUUCUCAGCAGCCA | 1.5   | hua enhancer 2 sugar mediated signaling pathway                                                                                             |
| vvi-miR3629c-5p | VIT_212s0035g01020 | 1                      | GGAUGUAAAAGAGUCGUCGGU | CUUACUUUUUCUCAGCAGCCG  | 2     | 60s ribosomal protein nucleolus                                                                                                             |
| vvi-miR3629c-5p | VIT_213s0019g04380 | 1                      | GGAUGUAAAAGAGUCGUCGGU | UCUACAUUUUUCUUGGCACCCA | 2.5   | protein developmental growth                                                                                                                |
| vvi-miR3629c-5p | VIT_213s0047g01200 | 1                      | GGAUGUAAAAGAGUCGUCGGU | CCUCCAUUUUUCUCAGCAACCA | 2     | obtusifoliol 14alpha-demethylase methionine                                                                                                 |
| vvi-miR3629c-5p | VIT_213s0064g00580 | 4                      | GGAUGUAAAAGAGUCGUCGGU | CCUACAUUUUUCUGGCAGCCA  | 0.5   | dd kda peptidyl-prolyl isomerase protein folding                                                                                            |
| vvi-miR3629c-5p | VIT_213s0073g00550 | 1                      | GGAUGUAAAAGAGUCGUCGGU | CCUGCAUUUUUCUCAGCAACUA | 2     | lysosomal beta glucosidase-like anchored to membrane                                                                                        |
| vvi-miR3629c-5p | VIT_214s0060g01430 | 3                      | GGAUGUAAAAGAGUCGUCGGU | UUUAUAUUUUUCUCAGCAGCCA | 1.5   | uncharacterized protein single-organism cellular process                                                                                    |
| vvi-miR3629c-5p | VIT_214s0060g01580 | 1                      | GGAUGUAAAAGAGUCGUCGGU | CCUGCAUUUUUCUGGCAACCG  | 2.5   | protein plasma membrane                                                                                                                     |
| vvi-miR3629c-5p | VIT_214s0066g00830 | 2                      | GGAUGUAAAAGAGUCGUCGGU | CCUGCAUUUUUCACCAACCA   | 2.5   | sirohochlorin ferrochelataze metal ion binding                                                                                              |

| miRNA name      | Target gene        | Number of target sites | miRNA sequence         | Target sequence        | Score | Target annotation                                                                             |
|-----------------|--------------------|------------------------|------------------------|------------------------|-------|-----------------------------------------------------------------------------------------------|
| vvi-miR3629c-5p | VIT_215s0046g03190 | 1                      | GGAUGUAAAAGAGUCGUCGGU  | CCUGCAUUUUCUCAGCUGCCA  | 1.5   | r2r3-myb transcription response to jasmonic acid stimulus                                     |
| vvi-miR3629c-5p | VIT_216s0039g01420 | 1                      | GGAUGUAAAAGAGUCGUCGGU  | CCUCCAUUUUCUUGGCAGCCA  | 2     | nucleotide-diphospho-sugar transferases superfamily protein pollen germination                |
| vvi-miR3629c-5p | VIT_216s0039g02430 | 2                      | GGAUGUAAAAGAGUCGUCGGU  | CCUGCAAUUUCUCAGCAACCA  | 2.5   | uncharacterized protein single-organism cellular process                                      |
| vvi-miR3629c-5p | VIT_216s0050g01780 | 1                      | GGAUGUAAAAGAGUCGUCGGU  | CUUCCAUUUUCUCAGCGGCCA  | 2     | probable membrane-associated kinase regulator 2-like response to stimulus                     |
| vvi-miR3629c-5p | VIT_216s0098g01870 | 6                      | GGAUGUAAAAGAGUCGUCGGU  | CCUACAUUUUUCAGCAGCCA   | 0.5   | calcineurin b-like protein 4 hypotonic salinity response                                      |
| vvi-miR3629c-5p | VIT_216s0098g01880 | 3                      | GGAUGUAAAAGAGUCGUCGGU  | CCUACAUUUUUCAAGCAACCA  | 2     | dipeptidyl peptidase cytosol                                                                  |
| vvi-miR3629c-5p | VIT_217s0000g01150 | 1                      | GGAUGUAAAAGAGUCGUCGGU  | CCUACAUUUUCUCAGCAGCCA  | 0     | curved DNA-binding protein protein folding                                                    |
| vvi-miR3632-3p  | VIT_211s0016g05350 | 1                      | AACCAUAACCCCCAGACCCUUU | UUGGUUAUCGGGGUCUGGGAAA | 1     | protein Rab GTPase activator activity                                                         |
| vvi-miR3632-3p  | VIT_213s0064g00550 | 1                      | AACCAUAACCCCCAGACCCUUU | UUGGUUAUCGGGGUUUAGGUAA | 2.5   | disease resistance protein rga4-like defense response                                         |
| vvi-miR3632-3p  | VIT_213s0067g00790 | 1                      | AACCAUAACCCCCAGACCCUUU | AUGGUUAUGGGGGUCUGGGAAA | 2     | disease resistance protein defense response                                                   |
| vvi-miR3632-3p  | VIT_213s0067g00830 | 4                      | AACCAUAACCCCCAGACCCUUU | AUGGUUAUGGGGGUCUGGGAAA | 2     | probable disease resistance rpp8-like protein 2-like defense response                         |
| vvi-miR3633a-3p | VIT_214s0036g00100 | 1                      | AUCCCUUACCCACCAUAUCCUU | UGGGGAUGGGUGGUGUGGGGA  | 2.5   | disease resistance protein at4g27190-like defense response                                    |
| vvi-miR3633a-5p | VIT_201s0026g02650 | 8                      | GAGAGGAUUGGUAGGUAAGG   | CUGUCCUAACCAUCCAUUUU   | 2     | kh domain-containing protein at4g18375-like response to abscisic acid stimulus                |
| vvi-miR3633a-5p | VIT_205s0051g00590 | 2                      | GAGAGGAUUGGUAGGUAAGG   | CUCUCUACCAUCCACUCC     | 2.5   | pectate lyase extracellular region                                                            |
| vvi-miR3633a-5p | VIT_207s0031g01910 | 1                      | GAGAGGAUUGGUAGGUAAGG   | CUUCCUGACCAUCCAUAUCU   | 2.5   | protein nucleus                                                                               |
| vvi-miR3633a-5p | VIT_213s0074g00440 | 4                      | GAGAGGAUUGGUAGGUAAGG   | CUCUCCUCCCAUCCAUUUC    | 2.5   | methyltransferase-like protein 13-like                                                        |
| vvi-miR3633a-5p | VIT_218s0001g07660 | 6                      | GAGAGGAUUGGUAGGUAAGG   | CUCUCCAAUCCUCCAUCC     | 2.5   | hydroxyproline-rich glycoprotein family protein RNA binding                                   |
| vvi-miR3633b-5p | VIT_205s0020g04900 | 2                      | UCUAGGGUCGGUGGGUAAGG   | AGAACUUAGCCACCAUUAUCC  | 2.5   | n-carbamoyl-l-amino acid hydrolase allantoin catabolic process                                |
| vvi-miR3633b-5p | VIT_210s0003g03540 | 1                      | UCUAGGGUCGGUGGGUAAGG   | AGAUUUCAGCCACCAUUAUAC  | 2     | beta-amyrin synthase                                                                          |
| vvi-miR3633b-5p | VIT_212s0034g02400 | 1                      | UCUAGGGUCGGUGGGUAAGG   | GGAUCCCA-CCAUCCAUCC    | 2.5   | disease resistance protein at3g14460-like defense response                                    |
| vvi-miR3633b-5p | VIT_212s0034g02440 | 1                      | UCUAGGGUCGGUGGGUAAGG   | AGAUCUCA-CCAUCCAUCC    | 2.5   | disease resistance protein at3g14460-like defense response                                    |
| vvi-miR3633b-5p | VIT_212s0034g02470 | 1                      | UCUAGGGUCGGUGGGUAAGG   | AGAUCCCA-CCAUCCAUCC    | 2     | disease resistance protein at3g14460-like defense response                                    |
| vvi-miR3633b-5p | VIT_216s0050g00050 | 1                      | UCUAGGGUCGGUGGGUAAGG   | AGACCCAGCUACCCUUUCC    | 2.5   | myb transcription factor DNA binding                                                          |
| vvi-miR3633b-5p | VIT_217s0000g00950 | 2                      | UCUAGGGUCGGUGGGUAAGG   | AGAUUCCAGCCACCAUACC    | 2.5   | hydroxycinnamoyl shikimate quinate hydroxycinnamoyltransferase-like protein nitrate transport |

| miRNA name     | Target gene        | Number of target sites | miRNA sequence          | Target sequence         | Score | Target annotation                                                                                               |
|----------------|--------------------|------------------------|-------------------------|-------------------------|-------|-----------------------------------------------------------------------------------------------------------------|
| vvi-miR3634-3p | VIT_219s0085g00430 | 1                      | UGCCGUACUCACGCUCAGCCUUU | AUGGCAUGAGUG-GAGUCGGAAA | 2     | hypothetical protein                                                                                            |
| vvi-miR3634-3p | VIT_219s0085g00470 | 1                      | UGCCGUACUCACGCUCAGCCUUU | AUGGCAUGAGUG-GAGUCGGAAA | 2     | hypothetical protein                                                                                            |
| vvi-miR3635-3p | VIT_217s0000g05850 | 5                      | CUCCGUACACACCCUGUAUUA   | GAGGCAUGUGUGGGACAUAU    | 0     | abc transporter retinal flippase subfamily plastid                                                              |
| vvi-miR3635-3p | VIT_218s0041g02230 | 1                      | CUCCGUACACACCCUGUAUUA   | GAGGCAUGUGUGGGACAUAU    | 0     | hypothetical protein                                                                                            |
| vvi-miR390-5p  | VIT_206s0004g01080 | 1                      | CCGCGAUAGGGAGGACUCGAA   | GGUGUUAUUCCUCUUGAGUUU   | 2.5   | dna (cytosine-5)-methyltransferase DNA methylation on cytosine within a CNG sequence                            |
| vvi-miR390-5p  | VIT_210s0003g01890 | 1                      | CCGCGAUAGGGAGGACUCGAA   | GGCGUUCUCCUCCUGAGCUU    | 2     | lrr receptor-like serine threonine-protein kinase rfk1 protein phosphorylation                                  |
| vvi-miR390-5p  | VIT_212s0059g01410 | 1                      | CCGCGAUAGGGAGGACUCGAA   | GGCGAUUUCUCCUGAGCUU     | 1.5   | hypothetical protein                                                                                            |
| vvi-miR390-5p  | VIT_216s0098g01090 | 1                      | CCGCGAUAGGGAGGACUCGAA   | GGCUCUAUACCUCUGAGCUU    | 2     | leucine-rich repeat receptor-like protein kinase pepr1 defense response                                         |
| vvi-miR393a-5p | VIT_206s0061g00780 | 1                      | CUAGUUACGCUAGGGAAACCU   | GAACAAUGUGAUCUCUUUGGA   | 2     | protein sensitive to proton rhizotoxicity 1-like nitrate transport                                              |
| vvi-miR393a-5p | VIT_218s0001g02460 | 1                      | CUAGUUACGCUAGGGAAACCU   | GAUCAGUGC-AUUCUUUGGA    | 2.5   | uncharacterized protein loc1002579dd isoform 2 membrane                                                         |
| vvi-miR393b-5p | VIT_206s0061g00780 | 1                      | CUAGUUACGCUAGGGAAACCU   | GAACAAUGUGAUCUCUUUGGA   | 2     | protein sensitive to proton rhizotoxicity 1-like nitrate transport                                              |
| vvi-miR393b-5p | VIT_218s0001g02460 | 1                      | CUAGUUACGCUAGGGAAACCU   | GAUCAGUGC-AUUCUUUGGA    | 2.5   | uncharacterized protein loc1002579dd isoform 2 membrane                                                         |
| vvi-miR394a-5p | VIT_201s0010g03730 | 2                      | CCUCCACCGUCUUACGGUU     | GGAGGUUGACAGAAUGCCAA    | 1     | f-box family protein regulation of auxin mediated signaling pathway                                             |
| vvi-miR394a-5p | VIT_202s0025g03200 | 1                      | CCUCCACCGUCUUACGGUU     | GGAAGUGGACAGAGUGCUGA    | 2.5   | dehydration-responsive family protein pollen exine formation                                                    |
| vvi-miR394a-5p | VIT_204s0008g02510 | 3                      | CCUCCACCGUCUUACGGUU     | GGAGGAGGAGAGAAUGCCAA    | 2     | g-type lectin s-receptor-like serine threonine-protein kinase at1g34300-like myosin light chain kinase activity |
| vvi-miR394a-5p | VIT_204s0008g02520 | 2                      | CCUCCACCGUCUUACGGUU     | GGAGGAGGAGAGAAUGCCAA    | 2     | g-type lectin s-receptor-like serine threonine-protein kinase at1g34300-like myosin light chain kinase activity |
| vvi-miR394a-5p | VIT_205s0049g00850 | 1                      | CCUCCACCGUCUUACGGUU     | GGAGGUGGCCGAAUGGCAA     | 2.5   | activating signal cointegrator 1-like mitochondrion                                                             |
| vvi-miR394b-5p | VIT_201s0010g03730 | 2                      | CCUCCACCGUCUUACGGUU     | GGAGGUUGACAGAAUGCCAA    | 1     | f-box family protein regulation of auxin mediated signaling pathway                                             |
| vvi-miR394b-5p | VIT_202s0025g03200 | 1                      | CCUCCACCGUCUUACGGUU     | GGAAGUGGACAGAGUGCUGA    | 2.5   | dehydration-responsive family protein pollen exine formation                                                    |



| miRNA name     | Target gene        | Number of target sites | miRNA sequence        | Target sequence       | Score | Target annotation                                                                                               |
|----------------|--------------------|------------------------|-----------------------|-----------------------|-------|-----------------------------------------------------------------------------------------------------------------|
| vvi-miR394b-5p | VIT_204s0008g02510 | 3                      | CCUCCACCUGUCUUACGGUU  | GGAGGAGGAGAGAAUGCCAA  | 2     | g-type lectin s-receptor-like serine threonine-protein kinase at1g34300-like myosin light chain kinase activity |
| vvi-miR394b-5p | VIT_204s0008g02520 | 2                      | CCUCCACCUGUCUUACGGUU  | GGAGGAGGAGAGAAUGCCAA  | 2     | g-type lectin s-receptor-like serine threonine-protein kinase at1g34300-like myosin light chain kinase activity |
| vvi-miR394b-5p | VIT_205s0049g00850 | 1                      | CCUCCACCUGUCUUACGGUU  | GGAGGUGGCCGGAUUGGCAA  | 2.5   | activating signal cointegrator 1-like mitochondrion                                                             |
| vvi-miR395a-3p | VIT_205s0020g04210 | 1                      | CUCAAGGGGGUUUGUGAAGUC | GAGUUCUCCAAACUCUUCAU  | 2.5   | atp sulfurylase water transport                                                                                 |
| vvi-miR395a-3p | VIT_207s0031g00940 | 2                      | CUCAAGGGGGUUUGUGAAGUC | AAGUUCUCCAAACACUUCAA  | 2.5   | sulfate bicarbonate oxalate exchanger and transporter sat-1 integral to membrane                                |
| vvi-miR395a-3p | VIT_212s0059g00760 | 4                      | CUCAAGGGGGUUUGUGAAGUC | GAGUUCUCCUACAAACUUCAG | 2.5   | prhdd protein phosphoadenylyl-sulfate reductase (thioredoxin) activity                                          |
| vvi-miR395a-3p | VIT_218s0001g04890 | 1                      | CUCAAGGGGGUUUGUGAAGUC | GAGCUCUCCAAACACUUCAG  | 1.5   | low affinity sulfate transporter 3-like integral to membrane                                                    |
| vvi-miR395c-3p | VIT_205s0020g04210 | 1                      | CUCAAGGGGGUUUGUGAAGUC | GAGUUCUCCAAACUCUUCAU  | 2.5   | atp sulfurylase water transport                                                                                 |
| vvi-miR395c-3p | VIT_207s0031g00940 | 2                      | CUCAAGGGGGUUUGUGAAGUC | AAGUUCUCCAAACACUUCAA  | 2.5   | sulfate bicarbonate oxalate exchanger and transporter sat-1 integral to membrane                                |
| vvi-miR395c-3p | VIT_212s0059g00760 | 4                      | CUCAAGGGGGUUUGUGAAGUC | GAGUUCUCCUACAAACUUCAG | 2.5   | prhdd protein phosphoadenylyl-sulfate reductase (thioredoxin) activity                                          |
| vvi-miR395c-3p | VIT_218s0001g04890 | 1                      | CUCAAGGGGGUUUGUGAAGUC | GAGCUCUCCAAACACUUCAG  | 1.5   | low affinity sulfate transporter 3-like integral to membrane                                                    |
| vvi-miR395c-5p | VIT_214s0066g00910 | 1                      | GUCACUUCACCAGUCCCUUG  | UGGUGAAGUGUUAAGGGAAC  | 2     | protein plasma membrane                                                                                         |
| vvi-miR395d-3p | VIT_205s0020g04210 | 1                      | CUCAAGGGGGUUUGUGAAGUC | GAGUUCUCCAAACUCUUCAU  | 2.5   | atp sulfurylase water transport                                                                                 |
| vvi-miR395d-3p | VIT_207s0031g00940 | 2                      | CUCAAGGGGGUUUGUGAAGUC | AAGUUCUCCAAACACUUCAA  | 2.5   | sulfate bicarbonate oxalate exchanger and transporter sat-1 integral to membrane                                |
| vvi-miR395d-3p | VIT_212s0059g00760 | 4                      | CUCAAGGGGGUUUGUGAAGUC | GAGUUCUCCUACAAACUUCAG | 2.5   | prhdd protein phosphoadenylyl-sulfate reductase (thioredoxin) activity                                          |
| vvi-miR395d-3p | VIT_218s0001g04890 | 1                      | CUCAAGGGGGUUUGUGAAGUC | GAGCUCUCCAAACACUUCAG  | 1.5   | low affinity sulfate transporter 3-like integral to membrane                                                    |
| vvi-miR395e-3p | VIT_205s0020g04210 | 1                      | CUCAAGGGGGUUUGUGAAGUC | GAGUUCUCCAAACUCUUCAU  | 2.5   | atp sulfurylase water transport                                                                                 |
| vvi-miR395e-3p | VIT_207s0031g00940 | 2                      | CUCAAGGGGGUUUGUGAAGUC | AAGUUCUCCAAACACUUCAA  | 2.5   | sulfate bicarbonate oxalate exchanger and transporter sat-1 integral to membrane                                |
| vvi-miR395e-3p | VIT_212s0059g00760 | 4                      | CUCAAGGGGGUUUGUGAAGUC | GAGUUCUCCUACAAACUUCAG | 2.5   | prhdd protein phosphoadenylyl-sulfate reductase (thioredoxin) activity                                          |
| vvi-miR395e-3p | VIT_218s0001g04890 | 1                      | CUCAAGGGGGUUUGUGAAGUC | GAGCUCUCCAAACACUUCAG  | 1.5   | low affinity sulfate transporter 3-like integral to membrane                                                    |
| vvi-miR395e-5p | VIT_214s0066g00910 | 1                      | GUCACUUCACCAGUCCCUUG  | UGGUGAAGUGUUAAGGGAAC  | 2     | protein plasma membrane                                                                                         |
| vvi-miR395f-3p | VIT_205s0020g04210 | 1                      | CUCAAGGGGGUUUGUGAAGUC | GAGUUCUCCAAACUCUUCAU  | 2.5   | atp sulfurylase water transport                                                                                 |

| miRNA name     | Target gene        | Number of target sites | miRNA sequence        | Target sequence        | Score | Target annotation                                                                |
|----------------|--------------------|------------------------|-----------------------|------------------------|-------|----------------------------------------------------------------------------------|
| vvi-miR395f-3p | VIT_207s0031g00940 | 2                      | CUCAAGGGGGUUUGUGAAGUC | AAGUUCUCCCAAACACUUCAA  | 2.5   | sulfate bicarbonate oxalate exchanger and transporter sat-1 integral to membrane |
| vvi-miR395f-3p | VIT_212s0059g00760 | 4                      | CUCAAGGGGGUUUGUGAAGUC | GAGUUCCCCUACAAACUUCAG  | 2.5   | prhdd protein phosphoadenylyl-sulfate reductase (thioredoxin) activity           |
| vvi-miR395f-3p | VIT_218s0001g04890 | 1                      | CUCAAGGGGGUUUGUGAAGUC | GAGCUCUCCCAAACACUUCAG  | 1.5   | low affinity sulfate transporter 3-like integral to membrane                     |
| vvi-miR395h-3p | VIT_205s0020g04210 | 1                      | CUCAAGGGGGUUUGUGAAGUC | GAGUUCUCCCAAACUCUUCAU  | 2.5   | atp sulfurylase water transport                                                  |
| vvi-miR395h-3p | VIT_207s0031g00940 | 2                      | CUCAAGGGGGUUUGUGAAGUC | AAGUUCUCCCAAACACUUCAA  | 2.5   | sulfate bicarbonate oxalate exchanger and transporter sat-1 integral to membrane |
| vvi-miR395h-3p | VIT_212s0059g00760 | 4                      | CUCAAGGGGGUUUGUGAAGUC | GAGUUCCCCUACAAACUUCAG  | 2.5   | prhdd protein phosphoadenylyl-sulfate reductase (thioredoxin) activity           |
| vvi-miR395h-3p | VIT_218s0001g04890 | 1                      | CUCAAGGGGGUUUGUGAAGUC | GAGCUCUCCCAAACACUUCAG  | 1.5   | low affinity sulfate transporter 3-like integral to membrane                     |
| vvi-miR395h-5p | VIT_214s0066g00910 | 1                      | GUCACUUCACCAGUCCCUUG  | UGGUGAAGUGUUC AAGGGAAC | 2     | protein plasma membrane                                                          |
| vvi-miR395i-3p | VIT_205s0020g04210 | 1                      | CUCAAGGGGGUUUGUGAAGUC | GAGUUCUCCCAAACUCUUCAU  | 2.5   | atp sulfurylase water transport                                                  |
| vvi-miR395i-3p | VIT_207s0031g00940 | 2                      | CUCAAGGGGGUUUGUGAAGUC | AAGUUCUCCCAAACACUUCAA  | 2.5   | sulfate bicarbonate oxalate exchanger and transporter sat-1 integral to membrane |
| vvi-miR395i-3p | VIT_212s0059g00760 | 4                      | CUCAAGGGGGUUUGUGAAGUC | GAGUUCCCCUACAAACUUCAG  | 2.5   | prhdd protein phosphoadenylyl-sulfate reductase (thioredoxin) activity           |
| vvi-miR395i-3p | VIT_218s0001g04890 | 1                      | CUCAAGGGGGUUUGUGAAGUC | GAGCUCUCCCAAACACUUCAG  | 1.5   | low affinity sulfate transporter 3-like integral to membrane                     |
| vvi-miR395j-3p | VIT_205s0020g04210 | 1                      | CUCAAGGGGGUUUGUGAAGUC | GAGUUCUCCCAAACUCUUCAU  | 2.5   | atp sulfurylase water transport                                                  |
| vvi-miR395j-3p | VIT_207s0031g00940 | 2                      | CUCAAGGGGGUUUGUGAAGUC | AAGUUCUCCCAAACACUUCAA  | 2.5   | sulfate bicarbonate oxalate exchanger and transporter sat-1 integral to membrane |
| vvi-miR395j-3p | VIT_212s0059g00760 | 4                      | CUCAAGGGGGUUUGUGAAGUC | GAGUUCCCCUACAAACUUCAG  | 2.5   | prhdd protein phosphoadenylyl-sulfate reductase (thioredoxin) activity           |
| vvi-miR395j-3p | VIT_218s0001g04890 | 1                      | CUCAAGGGGGUUUGUGAAGUC | GAGCUCUCCCAAACACUUCAG  | 1.5   | low affinity sulfate transporter 3-like integral to membrane                     |
| vvi-miR395k-3p | VIT_205s0020g04210 | 1                      | CUCAAGGGGGUUUGUGAAGUC | GAGUUCUCCCAAACUCUUCAU  | 2.5   | atp sulfurylase water transport                                                  |
| vvi-miR395k-3p | VIT_207s0031g00940 | 2                      | CUCAAGGGGGUUUGUGAAGUC | AAGUUCUCCCAAACACUUCAA  | 2.5   | sulfate bicarbonate oxalate exchanger and transporter sat-1 integral to membrane |
| vvi-miR395k-3p | VIT_212s0059g00760 | 4                      | CUCAAGGGGGUUUGUGAAGUC | GAGUUCCCCUACAAACUUCAG  | 2.5   | prhdd protein phosphoadenylyl-sulfate reductase (thioredoxin) activity           |
| vvi-miR395k-3p | VIT_218s0001g04890 | 1                      | CUCAAGGGGGUUUGUGAAGUC | GAGCUCUCCCAAACACUUCAG  | 1.5   | low affinity sulfate transporter 3-like integral to membrane                     |

| miRNA name     | Target gene        | Number of target sites | miRNA sequence        | Target sequence        | Score | Target annotation                                                                       |
|----------------|--------------------|------------------------|-----------------------|------------------------|-------|-----------------------------------------------------------------------------------------|
| vvi-miR395k-5p | VIT_214s0066g00910 | 1                      | GUCACUUCACCAGUCCCUUG  | UGGUGAAGUGUUC AAGGGAAC | 2     | protein plasma membrane                                                                 |
| vvi-miR395l-3p | VIT_205s0020g04210 | 1                      | CUCAAGGGGGUUUGUGAAGUC | GAGUCCUCCAAACUCUUCAU   | 2.5   | atp sulfurylase water transport                                                         |
| vvi-miR395l-3p | VIT_207s0031g00940 | 2                      | CUCAAGGGGGUUUGUGAAGUC | AAGUUCUCCAAACACUUCAA   | 2.5   | sulfate bicarbonate oxalate exchanger and transporter sat-1 integral to membrane        |
| vvi-miR395l-3p | VIT_212s0059g00760 | 4                      | CUCAAGGGGGUUUGUGAAGUC | GAGUCCCCUACAAACUUCAG   | 2.5   | prhdd protein phosphoadenylyl-sulfate reductase (thioredoxin) activity                  |
| vvi-miR395l-3p | VIT_218s0001g04890 | 1                      | CUCAAGGGGGUUUGUGAAGUC | GAGCUCUCCAAACACUUCAG   | 1.5   | low affinity sulfate transporter 3-like integral to membrane                            |
| vvi-miR396a-5p | VIT_202s0012g02250 | 7                      | AUCAAGUUCUUUCGACACCUU | UGGUUUGAGAAAAGUUGUGGAA | 2     | transcription factor hbp-1a sequence-specific DNA binding transcription factor activity |
| vvi-miR396b-5p | VIT_207s0191g00220 | 2                      | UUCAAGUUCUUUCGACACCUU | AAACUCAAGGAAGCUGUGGAA  | 2.5   | hypothetical protein                                                                    |
| vvi-miR396b-5p | VIT_211s0016g05580 | 5                      | UUCAAGUUCUUUCGACACCUU | AAGUUCAAGAAAACUGUGGUA  | 2     | methyl binding domain protein nucleus                                                   |
| vvi-miR396c-5p | VIT_202s0012g02250 | 7                      | GUCAAGUUCUUUCGACACCUU | UGGUUUGAGAAAAGUUGUGGAA | 2.5   | transcription factor hbp-1a sequence-specific DNA binding transcription factor activity |
| vvi-miR396c-5p | VIT_204s0008g00915 | 1                      | GUCAAGUUCUUUCGACACCUU | CAGUUCAGGAAGGUUUUGGAA  | 2.5   | receptor-like protein kinase hsl1-like plasma membrane                                  |
| vvi-miR396d-3p | VIT_215s0024g00350 | 1                      | GAAGGGUGUCGAAAUAACUUG | CUUCCAAGUUGUUGAAG      | 2     | tata box binding protein associated factor-like protein helicase activity               |
| vvi-miR396d-5p | VIT_202s0012g02250 | 7                      | UCAAGUUCUUUCGACACCUU  | GGUUUGAGAAAAGUUGUGGAA  | 2     | transcription factor hbp-1a sequence-specific DNA binding transcription factor activity |
| vvi-miR396d-5p | VIT_202s0033g01260 | 1                      | UCAAGUUCUUUCGACACCUU  | UGUUCAAGAAGGCUGUGGCA   | 2.5   | uncharacterized protein loc1002569dd oxidation-reduction process                        |
| vvi-miR396d-5p | VIT_204s0008g00915 | 1                      | UCAAGUUCUUUCGACACCUU  | AGUUCAGGAAGGUUUUGGAA   | 2.5   | receptor-like protein kinase hsl1-like plasma membrane                                  |
| vvi-miR396d-5p | VIT_206s0009g02740 | 1                      | UCAAGUUCUUUCGACACCUU  | AGUUCAAGAAAGCUUUGAAG   | 2.5   | pentatricopeptide repeat-containing protein chloroplastic-like protein binding          |
| vvi-miR396d-5p | VIT_207s0191g00220 | 2                      | UCAAGUUCUUUCGACACCUU  | AACUCAAGGAAGCUGUGGAA   | 2.5   | hypothetical protein                                                                    |
| vvi-miR396d-5p | VIT_211s0016g05580 | 5                      | UCAAGUUCUUUCGACACCUU  | AGUUCAAGAAAACUGUGGUA   | 2     | methyl binding domain protein nucleus                                                   |
| vvi-miR397a-5p | VIT_204s0023g01960 | 7                      | GUAGUUGCGACGUGAGUUACU | CAUCAAUGCUGCUCUCAACGA  | 2.5   | laccase (diphenol oxidase)-like protein copper ion binding                              |
| vvi-miR397a-5p | VIT_204s0069g00950 | 2                      | GUAGUUGCGACGUGAGUUACU | UGUCAAUGCUGCACUCAAUGA  | 1.5   | laccase (diphenol oxidase)-like protein copper ion binding                              |
| vvi-miR397a-5p | VIT_206s0004g03760 | 2                      | GUAGUUGCGACGUGAGUUACU | CAUCAAUGCAGCACUCAAUGA  | 1.5   | protein copper ion binding                                                              |
| vvi-miR397a-5p | VIT_206s0004g04050 | 2                      | GUAGUUGCGACGUGAGUUACU | GAUCAACGCAGCGUCAAUGA   | 2.5   | protein copper ion binding                                                              |
| vvi-miR397a-5p | VIT_206s0004g06090 | 1                      | GUAGUUGCGACGUGAGUUACU | CAUCAACGCUGCGUGAAUGA   | 1.5   | laccase 1a copper ion binding                                                           |
| vvi-miR397a-5p | VIT_208s0007g00600 | 2                      | GUAGUUGCGACGUGAGUUACU | GAUCAACGCUGCACUCAACGA  | 2     | laccase 110b copper ion binding                                                         |
| vvi-miR397a-5p | VIT_208s0007g00670 | 1                      | GUAGUUGCGACGUGAGUUACU | AAUCAAUGCUGCACUCAAUGA  | 1.5   | laccase 110c response to water deprivation                                              |
| vvi-miR397a-5p | VIT_208s0007g00680 | 1                      | GUAGUUGCGACGUGAGUUACU | GAUCAAUGCAGCACUCAAUGA  | 2.5   | laccase 110c response to water deprivation                                              |
| vvi-miR397a-5p | VIT_208s0007g01550 | 1                      | GUAGUUGCGACGUGAGUUACU | AAUUAACGCUGCACUCAUAA   | 2.5   | laccase 110a copper ion binding                                                         |
| vvi-miR397a-5p | VIT_208s0007g01910 | 2                      | GUAGUUGCGACGUGAGUUACU | CAUUAACGCUGCACUCAAUGA  | 0.5   | laccase 1a glucuronoxylan                                                               |

| miRNA name     | Target gene        | Number of target sites | miRNA sequence        | Target sequence        | Score | Target annotation                                                            |
|----------------|--------------------|------------------------|-----------------------|------------------------|-------|------------------------------------------------------------------------------|
| vvi-miR397a-5p | VIT_208s0007g06460 | 5                      | GUAGUUGCGACGUGAGUUACU | UGUCA AUGCUGCACUCAACGA | 2.5   | laccase (diphenol oxidase)-like protein copper ion binding                   |
| vvi-miR397a-5p | VIT_208s0040g01790 | 5                      | GUAGUUGCGACGUGAGUUACU | CGUCA AUGCUGCACUCAAUGA | 1     | laccase (diphenol oxidase)-like protein copper ion binding                   |
| vvi-miR397a-5p | VIT_213s0019g01920 | 1                      | GUAGUUGCGACGUGAGUUACU | GAUCA AUGCCGCACUCAAUGA | 2.5   | laccase-dd hydroquinone:oxygen oxidoreductase activity                       |
| vvi-miR397a-5p | VIT_213s0019g01930 | 1                      | GUAGUUGCGACGUGAGUUACU | GAUCAACGCUGCACUCAAUGA  | 1     | laccase-17-like [Vitis vinifera] hydroquinone:oxygen oxidoreductase activity |
| vvi-miR397a-5p | VIT_213s0019g01940 | 1                      | GUAGUUGCGACGUGAGUUACU | GAUCA AUGCUGCACUCAAUGA | 1.5   | laccase-dd hydroquinone:oxygen oxidoreductase activity                       |
| vvi-miR397a-5p | VIT_213s0019g02150 | 1                      | GUAGUUGCGACGUGAGUUACU | GAUCA AUGCUGCACUCAAUGA | 1.5   | laccase-dd hydroquinone:oxygen oxidoreductase activity                       |
| vvi-miR397a-5p | VIT_213s0019g02160 | 1                      | GUAGUUGCGACGUGAGUUACU | GAUCA AUGCUGCACUCAAUGA | 1.5   | laccase-dd hydroquinone:oxygen oxidoreductase activity                       |
| vvi-miR399a-3p | VIT_200s0265g00070 | 2                      | GUCCCGUUAAGAGGAAACCGU | UAGGGCAAUCUCCUUUGGCA   | 1.5   | probable ubiquitin-conjugating enzyme e2 24-like postreplication repair      |
| vvi-miR399a-5p | VIT_200s0131g00355 | 1                      | AGACGGUUUCCUCUAGUGUG  | UUUGCCAAUGAGAGUCGCAC   | 2.5   | low quality protein: annexin d4-like response to abscisic acid stimulus      |
| vvi-miR399b-3p | VIT_200s0265g00070 | 2                      | GUCCCGUUGAGAGGAAACCGU | UAGGGCAAUCUCCUUUGGCA   | 1.5   | probable ubiquitin-conjugating enzyme e2 24-like postreplication repair      |
| vvi-miR399b-3p | VIT_213s0067g03280 | 1                      | GUCCCGUUGAGAGGAAACCGU | CUGGGCAACUCUCCUUUGGCU  | 2.5   | high affinity inorganic phosphate transporter phosphate ion transport        |
| vvi-miR399c-3p | VIT_200s0265g00070 | 2                      | GUCCCGUUGAGAGGAAACCGU | UAGGGCAAUCUCCUUUGGCA   | 1.5   | probable ubiquitin-conjugating enzyme e2 24-like postreplication repair      |
| vvi-miR399c-3p | VIT_213s0067g03280 | 1                      | GUCCCGUUGAGAGGAAACCGU | CUGGGCAACUCUCCUUUGGCU  | 2.5   | high affinity inorganic phosphate transporter phosphate ion transport        |
| vvi-miR399e-3p | VIT_200s0265g00070 | 2                      | GGCCCGUUUAGAGGAAACCGU | AGGGGCAAUCUCCUUUGGCA   | 2     | probable ubiquitin-conjugating enzyme e2 24-like postreplication repair      |
| vvi-miR399e-3p | VIT_200s0265g00070 | 2                      | GGCCCGUUUAGAGGAAACCGU | GGGGGCAAUCUCCUUUGGCA   | 2     | probable ubiquitin-conjugating enzyme e2 24-like postreplication repair      |
| vvi-miR399e-3p | VIT_200s0265g00070 | 2                      | GGCCCGUUUAGAGGAAACCGU | GUGGGCAAUCUCCUUUGGCA   | 2.5   | probable ubiquitin-conjugating enzyme e2 24-like postreplication repair      |
| vvi-miR399e-3p | VIT_200s0265g00070 | 2                      | GGCCCGUUUAGAGGAAACCGU | UAGGGCAAUCUCCUUUGGCA   | 2.5   | probable ubiquitin-conjugating enzyme e2 24-like postreplication repair      |

| miRNA name     | Target gene        | Number of target sites | miRNA sequence        | Target sequence       | Score | Target annotation                                                                                                               |
|----------------|--------------------|------------------------|-----------------------|-----------------------|-------|---------------------------------------------------------------------------------------------------------------------------------|
| vvi-miR399e-3p | VIT_200s0265g00070 | 2                      | GGCCCGUUUAGAGGAAACCGU | UUGGGCAAUUCUCCUUUGGCA | 1     | probable ubiquitin-conjugating enzyme e2 24-like postreplication repair                                                         |
| vvi-miR399h-3p | VIT_200s0265g00070 | 2                      | GUCCCGUUUAGAGGAAACCGU | UAGGGCAAUUCUCCUUUGGCA | 1.5   | probable ubiquitin-conjugating enzyme e2 24-like postreplication repair                                                         |
| vvi-miR399i-3p | VIT_200s0265g00070 | 2                      | GUCCCGUUGAGAGGAAACCGC | UAGGGCAAUUCUCCUUUGGCA | 2.5   | probable ubiquitin-conjugating enzyme e2 24-like postreplication repair                                                         |
| vvi-miR399i-3p | VIT_213s0067g03280 | 1                      | GUCCCGUUGAGAGGAAACCGC | CUGGGCAACUCUUCUUUGGCU | 2.5   | high affinity inorganic phosphate transporter phosphate ion transport                                                           |
| vvi-miR399i-3p | VIT_218s0166g00230 | 1                      | GUCCCGUUGAGAGGAAACCGC | CAGGGCAGC-CUCUUUUGGCG | 2.5   | g-type lectin s-receptor-like serine threonine-protein kinase rlk1-like transmembrane receptor protein tyrosine kinase activity |
| vvi-miR403a-3p | VIT_205s0077g00800 | 2                      | GCUCAAACACGCACUUAGAUU | CAAGUUUGUGCGUGAAUCAAA | 2     | gins complex subunit 4 regulation of cell cycle                                                                                 |
| vvi-miR403a-3p | VIT_207s0005g01690 | 1                      | GCUCAAACACGCACUUAGAUU | GGAGUUUGUGCGUGACUCUAA | 2     | hypothetical protein                                                                                                            |
| vvi-miR403a-3p | VIT_210s0042g01150 | 1                      | GCUCAAACACGCACUUAGAUU | GGAGUUUGUGCGUGAAUCUAA | 1     | protein argonaute 2-like defense response to bacterium                                                                          |
| vvi-miR403a-3p | VIT_210s0042g01180 | 2                      | GCUCAAACACGCACUUAGAUU | GGAGUUUGUGCGUGAAUCUAA | 1     | protein argonaute 2-like defense response to bacterium                                                                          |
| vvi-miR403a-3p | VIT_210s0042g01200 | 2                      | GCUCAAACACGCACUUAGAUU | GGAGUUUGUGCGUGAAUCUAA | 1     | protein argonaute 2-like defense response to bacterium                                                                          |
| vvi-miR403b-3p | VIT_205s0077g00800 | 2                      | GCUCAAACACGCACUUAGAUU | CAAGUUUGUGCGUGAAUCAAA | 2     | gins complex subunit 4 regulation of cell cycle                                                                                 |
| vvi-miR403b-3p | VIT_207s0005g01690 | 1                      | GCUCAAACACGCACUUAGAUU | GGAGUUUGUGCGUGACUCUAA | 2     | hypothetical protein                                                                                                            |
| vvi-miR403b-3p | VIT_210s0042g01150 | 1                      | GCUCAAACACGCACUUAGAUU | GGAGUUUGUGCGUGAAUCUAA | 1     | protein argonaute 2-like defense response to bacterium                                                                          |
| vvi-miR403b-3p | VIT_210s0042g01180 | 2                      | GCUCAAACACGCACUUAGAUU | GGAGUUUGUGCGUGAAUCUAA | 1     | protein argonaute 2-like defense response to bacterium                                                                          |
| vvi-miR403b-3p | VIT_210s0042g01200 | 2                      | GCUCAAACACGCACUUAGAUU | GGAGUUUGUGCGUGAAUCUAA | 1     | protein argonaute 2-like defense response to bacterium                                                                          |
| vvi-miR403d-3p | VIT_205s0077g00800 | 2                      | GCUCAAACACGCACUUAGAUU | CAAGUUUGUGCGUGAAUCAAA | 2     | gins complex subunit 4 regulation of cell cycle                                                                                 |
| vvi-miR403d-3p | VIT_207s0005g01690 | 1                      | GCUCAAACACGCACUUAGAUU | GGAGUUUGUGCGUGACUCUAA | 2     | hypothetical protein                                                                                                            |
| vvi-miR403d-3p | VIT_210s0042g01150 | 1                      | GCUCAAACACGCACUUAGAUU | GGAGUUUGUGCGUGAAUCUAA | 1     | protein argonaute 2-like defense response to bacterium                                                                          |
| vvi-miR403d-3p | VIT_210s0042g01180 | 2                      | GCUCAAACACGCACUUAGAUU | GGAGUUUGUGCGUGAAUCUAA | 1     | protein argonaute 2-like defense response to bacterium                                                                          |
| vvi-miR403d-3p | VIT_210s0042g01200 | 2                      | GCUCAAACACGCACUUAGAUU | GGAGUUUGUGCGUGAAUCUAA | 1     | protein argonaute 2-like defense response to bacterium                                                                          |
| vvi-miR403e-3p | VIT_205s0077g00800 | 2                      | GCUCAAACACGCACUUAGAUU | CAAGUUUGUGCGUGAAUCAAA | 2     | gins complex subunit 4 regulation of cell cycle                                                                                 |
| vvi-miR403e-3p | VIT_207s0005g01690 | 1                      | GCUCAAACACGCACUUAGAUU | GGAGUUUGUGCGUGACUCUAA | 2     | hypothetical protein                                                                                                            |
| vvi-miR403e-3p | VIT_210s0042g01150 | 1                      | GCUCAAACACGCACUUAGAUU | GGAGUUUGUGCGUGAAUCUAA | 1     | protein argonaute 2-like defense response to bacterium                                                                          |

| miRNA name     | Target gene        | Number of target sites | miRNA sequence         | Target sequence        | Score | Target annotation                                                                      |
|----------------|--------------------|------------------------|------------------------|------------------------|-------|----------------------------------------------------------------------------------------|
| vvi-miR403e-3p | VIT_210s0042g01180 | 2                      | GCUCAAACACGCACUUAGAAU  | GGAGUUUGUGCGUGAAUCUAA  | 1     | protein argonaute 2-like defense response to bacterium                                 |
| vvi-miR403e-3p | VIT_210s0042g01200 | 2                      | GCUCAAACACGCACUUAGAAU  | GGAGUUUGUGCGUGAAUCUAA  | 1     | protein argonaute 2-like defense response to bacterium                                 |
| vvi-miR403f-3p | VIT_205s0077g00800 | 2                      | GCUCAAACACGCACUUAGAAU  | CAAGUUUGUGCGUGAAUCAAA  | 2     | gins complex subunit 4 regulation of cell cycle                                        |
| vvi-miR403f-3p | VIT_207s0005g01690 | 1                      | GCUCAAACACGCACUUAGAAU  | GGAGUUUGUGCGUGACUCUAA  | 2     | hypothetical protein                                                                   |
| vvi-miR403f-3p | VIT_210s0042g01150 | 1                      | GCUCAAACACGCACUUAGAAU  | GGAGUUUGUGCGUGAAUCUAA  | 1     | protein argonaute 2-like defense response to bacterium                                 |
| vvi-miR403f-3p | VIT_210s0042g01180 | 2                      | GCUCAAACACGCACUUAGAAU  | GGAGUUUGUGCGUGAAUCUAA  | 1     | protein argonaute 2-like defense response to bacterium                                 |
| vvi-miR403f-3p | VIT_210s0042g01200 | 2                      | GCUCAAACACGCACUUAGAAU  | GGAGUUUGUGCGUGAAUCUAA  | 1     | protein argonaute 2-like defense response to bacterium                                 |
| vvi-miR403f-5p | VIT_207s0005g01690 | 1                      | AAAAUCUCAGUGCGUGUUUGA  | UCUUAGAUUCACGCACAAACU  | 2     | hypothetical protein                                                                   |
| vvi-miR408-3p  | VIT_203s0063g00990 | 1                      | CGGUCCCUUCUCCGUCACGUA  | GCUAGGGAAGAUGCAGUGCUU  | 2.5   | uncharacterized protein loc1002555dd copper ion binding                                |
| vvi-miR408-3p  | VIT_203s0063g01010 | 1                      | CGGUCCCUUCUCCGUCACGUA  | GCUAGGGAAGAUGCAGUGCUU  | 2.5   | uncharacterized protein loc1002486dd copper ion binding                                |
| vvi-miR408-3p  | VIT_207s0005g02730 | 3                      | CGGUCCCUUCUCCGUCACGUA  | GCCAGGGAAGAGGCAGUGCAU  | 0     | protein DNA binding                                                                    |
| vvi-miR408-5p  | VIT_207s0005g02720 | 1                      | GGUACGUGAUGGAGCAGGGGC  | CCAUGCACUGCCUCUCCUG    | 2     | hypothetical protein                                                                   |
| vvi-miR408-5p  | VIT_207s0005g02730 | 3                      | GGUACGUGAUGGAGCAGGGGC  | CCAUGCACUACCUCGUCCCG   | 0     | protein DNA binding                                                                    |
| vvi-miR408-5p  | VIT_208s0007g05590 | 1                      | GGUACGUGAUGGAGCAGGGGC  | CCAUGCACUACCACGUCCCG   | 1     | beta-8 tubulin plastid                                                                 |
| vvi-miR408-5p  | VIT_218s0041g01550 | 1                      | GGUACGUGAUGGAGCAGGGGC  | CCAUGCACUACACGUCCCG    | 2     | beta chain cytoskeleton organization                                                   |
| vvi-miR477b-5p | VIT_201s0010g02270 | 1                      | GUCUUCGGGAACUCCUCUCA   | UGGAAGCCUUGAGGGAGAGA   | 2.5   | gras family transcription factor regulation of transcription                           |
| vvi-miR477b-5p | VIT_204s0008g06260 | 5                      | GUCUUCGGGAACUCCUCUCA   | CAGAAGCCUUGAAGAAGAGU   | 2.5   | exosome complex exonuclease rrpdd RNA methylation                                      |
| vvi-miR477b-5p | VIT_208s0058g01400 | 3                      | GUCUUCGGGAACUCCUCUCA   | CAGAAGCCUUGAAGGGGAGA   | 2.5   | aminophospholipid atpase integral to membrane                                          |
| vvi-miR477b-5p | VIT_217s0000g10300 | 1                      | GUCUUCGGGAACUCCUCUCA   | UGGAAGCCUUGAGGGAGAGA   | 2.5   | gras family transcription factor regulation of transcription                           |
| vvi-miR479-3p  | VIT_218s0001g03310 | 1                      | CUCACUAUAACCAAGCCGAGC  | GGGUGAUUUGGUUCGGCUCA   | 1.5   | gras family protein nuclear membrane                                                   |
| vvi-miR482-3p  | VIT_202s0012g02720 | 1                      | CCUUAACCCUCCUCAUCCUUCU | GGGAUGGGGGACUAGGGAAGA  | 2.5   | nbs-lrr resistance protein defense response                                            |
| vvi-miR482-3p  | VIT_218s0072g01090 | 1                      | CCUUAACCCUCCUCAUCCUUCU | GGAAUAGGAGGGGUAGGAAAGA | 1.5   | hypothetical protein                                                                   |
| vvi-miR482-5p  | VIT_200s1944g00010 | 1                      | UUCGAAAGGAUGAGAGGUUAA  | AAGCUUUUCUACUCUUUAUG   | 2.5   | pentatricopeptide repeat-containing protein embryo development ending in seed dormancy |

| miRNA name     | Target gene        | Number of target sites | miRNA sequence        | Target sequence       | Score | Target annotation                                                                      |
|----------------|--------------------|------------------------|-----------------------|-----------------------|-------|----------------------------------------------------------------------------------------|
| vvi-miR482-5p  | VIT_200s2304g00010 | 1                      | UUCGAAAGGAUGAGAGGUUAA | AAGCUUUUCUACUCUUUAAUG | 2.5   | pentatricopeptide repeat-containing protein embryo development ending in seed dormancy |
| vvi-miR482-5p  | VIT_200s2397g00010 | 1                      | UUCGAAAGGAUGAGAGGUUAA | AAGCUUUUCUACUCUUUAAUG | 2.5   | pentatricopeptide repeat-containing protein embryo development ending in seed dormancy |
| vvi-miR482-5p  | VIT_208s0007g03550 | 1                      | UUCGAAAGGAUGAGAGGUUAA | AAGUUUUCUUACUUUUCAGUU | 2.5   | solute carrier family dd member f1-like cytoplasmic membrane-bounded vesicle           |
| vvi-miR535a-5p | VIT_200s0358g00010 | 1                      | CGCACGAGAGAGAGCAACAGU | GCGUGCUCUCUCUCGCUGUCA | 1     | hypothetical protein                                                                   |
| vvi-miR535a-5p | VIT_207s0104g00030 | 1                      | CGCACGAGAGAGAGCAACAGU | GCGUGCUCUCUGUCGCUGUCA | 2     | hypothetical protein                                                                   |
| vvi-miR535c-3p | VIT_204s0023g01080 | 1                      | AUACUGUCGCUGUCUCUCGUG | UUUGACAGAGACAGAGAGCAU | 2.5   | type receptor kinase protein phosphorylation                                           |
| vvi-miR535c-5p | VIT_200s0358g00010 | 1                      | CGCACGAGAGAGAGCAACAGU | GCGUGCUCUCUCUCGCUGUCA | 1     | hypothetical protein                                                                   |
| vvi-miR535c-5p | VIT_207s0104g00030 | 1                      | CGCACGAGAGAGAGCAACAGU | GCGUGCUCUCUGUCGCUGUCA | 2     | hypothetical protein                                                                   |

**Supplementary Table 4: Differentially expressed (DE) miRNA, between cultivars or vineyards, in each developmental stage.** Sequence of each DE read, its match type, Fold change and FDR-corrected p-value are indicated. Highlighted in green are FDR  $\leq 0.05$ .

The description of small RNA libraries codes are shown in Table 1.

### Pea size

| Small RNA - Name | sequence read             | Match type         | Mon_C<br>S_ps vs<br>Bol_CS<br>_ps -<br>FC | Mon_C<br>S_ps vs<br>Bol_CS<br>_ps -<br>FDR | Mon_C<br>S_ps vs<br>Ric_CS<br>_ps -<br>FC | Mon_C<br>S_ps vs<br>Ric_CS<br>_ps -<br>FDR | Bol_CS<br>_ps vs<br>Ric_CS<br>_ps -<br>FC | Bol_CS<br>_ps vs<br>Ric_CS<br>_ps -<br>FDR | Mon_S<br>G_ps<br>vs<br>Bol_SG<br>_ps -<br>FC | Mon_S<br>G_ps<br>vs<br>Bol_SG<br>_ps -<br>FDR | Mon_S<br>G_ps<br>vs<br>Ric_SG<br>_ps -<br>FC | Mon_S<br>G_ps<br>vs<br>Ric_SG<br>_ps -<br>FDR | Bol_SG<br>_ps vs<br>Ric_SG<br>_ps -<br>FC | Bol_SG<br>_ps vs<br>Ric_SG<br>_ps -<br>FDR | Mon_C<br>S_ps vs<br>Mon_S<br>G_ps -<br>FC | Mon_C<br>S_ps vs<br>Mon_S<br>G_ps -<br>FDR | Bol_CS<br>_ps vs<br>Bol_SG<br>_ps -<br>FC | Bol_CS<br>_ps vs<br>Bol_SG<br>_ps -<br>FDR | Ric_CS<br>_ps vs<br>Ric_SG<br>_ps -<br>FC | Ric_CS<br>_ps vs<br>Ric_SG<br>_ps -<br>FDR |
|------------------|---------------------------|--------------------|-------------------------------------------|--------------------------------------------|-------------------------------------------|--------------------------------------------|-------------------------------------------|--------------------------------------------|----------------------------------------------|-----------------------------------------------|----------------------------------------------|-----------------------------------------------|-------------------------------------------|--------------------------------------------|-------------------------------------------|--------------------------------------------|-------------------------------------------|--------------------------------------------|-------------------------------------------|--------------------------------------------|
| vvi-miR166b      | TCGGACCAGGCT<br>TCATTCTCT | Mature 3'<br>super | 1.865                                     | 1                                          | 1.686                                     | 1                                          | -1.106                                    | 1                                          | 1.020                                        | 1                                             | 1.215                                        | 1                                             | 1.191                                     | 1                                          | 15.499                                    | 0.034                                      | 8.474                                     | 0.338                                      | 11.167                                    | 0.171                                      |
| vvi-miR166b.f    | GGAATGTTGGCT<br>GGCTCGAG  | Mature 5'<br>sub   | 3.987                                     | 1                                          | 3.454                                     | 1                                          | -1.155                                    | 1                                          | -2.267                                       | 1                                             | -1.428                                       | 1                                             | 1.588                                     | 1                                          | 55.620                                    | 0.015                                      | 6.153                                     | 0.945                                      | 11.281                                    | 0.182                                      |
| vvi-miR166b.f    | AATGTTGGCTGG<br>CTCGAGG   | Mature 5'<br>sub   | -4.292                                    | 1                                          | -3.052                                    | 1                                          | 1.406                                     | 1                                          | -1.130                                       | 1                                             | -5.762                                       | 1                                             | -5.100                                    | 1                                          | 5.733                                     | 1.000                                      | 21.782                                    | 0.038                                      | 3.036                                     | 1                                          |

## Supplementary Material

|                   |                              |                        |        |   |        |   |        |   |             |       |             |              |        |   |             |       |             |        |              |              |        |       |
|-------------------|------------------------------|------------------------|--------|---|--------|---|--------|---|-------------|-------|-------------|--------------|--------|---|-------------|-------|-------------|--------|--------------|--------------|--------|-------|
| vvi-miR319c       | ATTGAATGATGC<br>GGGAGACA     | Precursor              | -1.785 | 1 | -2.864 | 1 | -1.604 | 1 | 22.249      | 1     | 21.474      | 1            | -1.036 | 1 | 301.14<br>0 | 0.024 | -7.581      | 0.945  | -4.897       | 1            |        |       |
| vvi-miR319c       | ATTGAATGATGC<br>GGGAGACAA    | Precursor              | -1.147 | 1 | -2.648 | 1 | -2.308 | 1 | -1.200      | 1     | 2.127       | 1            | 2.552  | 1 | 26.312      | 0.015 | -           | 27.515 | 0.007        | -4.671       | 1      |       |
| vvi-miR319c       | ATTGAATGATGC<br>GGGAGACAAA   | Precursor              | -1.826 | 1 | -2.881 | 1 | -1.578 | 1 | 1           | 1     | 8.284       | 1            | 8.284  | 1 | 302.78<br>6 | 0.016 | 165.84<br>0 | 0.037  | -            | 12.685       | 0.590  |       |
| vvi-miR319c       | AGCTGCCGACTC<br>ATTCATCCA    | Precursor              | -1.014 | 1 | -1.711 | 1 | -1.687 | 1 | -3.644      | 1     | -1.775      | 1            | 2.053  | 1 | -4.833      | 1.000 | -           | 17.367 | 0.007        | -5.015       | 0.590  |       |
| vvi-miR319c.b.f.g | TTGGACTGAAGG<br>GAGCTCCC     | Mature 3'              | -1.598 | 1 | -2.572 | 1 | -1.610 | 1 | 1.879       | 1     | 3.631       | 1            | 1.933  | 1 | -9.707      | 0.018 | -3.234      | 1      | -1.040       | 1            |        |       |
| vvi-miR3627       | CGCCGCTCTCTG<br>TGACAAG      | Mature 3'<br>sub       | 3.286  | 1 | 2.990  | 1 | -1.099 | 1 | 5.321       | 1     | 1.191       | 1            | -4.466 | 1 | -5.389      | 1.000 | -3.328      | 1      | 13.524       | 0.013        |        |       |
| vvi-miR3627       | TCGCCGCTCTCT<br>GTGACAAG     | Mature 3'              | 1.918  | 1 | 1.836  | 1 | -1.045 | 1 | 3.808       | 1     | -1.520      | 1            | -5.787 | 1 | -4.270      | 1.000 | -2.151      | 1      | 11.918       | 0.047        |        |       |
| vvi-miR3636       | GTCTGTCGGAGA<br>AGCAAGTCGGA  | Mature 3'<br>sub/super | 1      | 1 | -1     | 1 | -1     | 1 | 1.617       | 1     | 2.008       | 1            | 1.242  | 1 | 499.05<br>5 | 0.015 | 806.82<br>0 | 0.000  | 1001.9<br>16 | 6.42E-<br>06 |        |       |
| vvi-miR3636       | GTCTGTCGGAGA<br>AGCAAGTCGGAG | Mature 3'<br>sub/super | 1      | 1 | -1     | 1 | -1     | 1 | -1.352      | 1     | 1.446       | 1            | 1.955  | 1 | 431.33<br>9 | 0.015 | 318.92<br>3 | 0.005  | 623.59<br>9  | 1.13E-<br>04 |        |       |
| vvi-miR3640       | TGCCACGTGTGC<br>AACTCAGGTCT  | Precursor              | -1.390 | 1 | -1.173 | 1 | 1.185  | 1 | -1.912      | 1     | -1.677      | 1            | 1.140  | 1 | -           | 0.124 | -           | 18.865 | 0.014        | -            | 19.604 | 0.008 |
| vvi-miRC477o      | GTTGGAAGTCGG<br>TGGGGGACC    | Mature 3'              | -1.280 | 1 | 2.728  | 1 | 3.490  | 1 | 135.44<br>0 | 0.039 | 436.02<br>7 | 2.83E-<br>04 | 3.219  | 1 | 114.99<br>4 | 0.016 | 1.507       | 1      | 1.390        | 1            |        |       |



## 19 °Brix

| Small RNA - Name      | sequence read                | Match type          | Mon_C S_19 vs Ric_CS_19 - FC | Mon_C S_19 vs Ric_CS_19 - FDR | Mon_C S_19 vs Bol_CS_19 - FC | Mon_C S_19 vs Bol_CS_19 - FDR | Ric_CS_19 vs Bol_CS_19 - FC | Ric_CS_19 vs Bol_CS_19 - FDR | Mon_S G_19 vs Ric_SG_19 - FC | Mon_S G_19 vs Ric_SG_19 - FDR | Mon_S G_19 vs Bol_SG_19 - FC | Mon_S G_19 vs Bol_SG_19 - FDR | Ric_SG_19 vs Bol_SG_19 - FC | Ric_SG_19 vs Bol_SG_19 - FDR | Mon_C S_19 vs Mon_S G_19 - FC | Mon_C S_19 vs Mon_S G_19 - FDR | Ric_CS_19 vs Ric_SG_19 - FC | Ric_CS_19 vs Ric_SG_19 - FDR | Bol_CS_19 vs Bol_SG_19 - FC | Bol_CS_19 vs Bol_SG_19 - FDR |   |
|-----------------------|------------------------------|---------------------|------------------------------|-------------------------------|------------------------------|-------------------------------|-----------------------------|------------------------------|------------------------------|-------------------------------|------------------------------|-------------------------------|-----------------------------|------------------------------|-------------------------------|--------------------------------|-----------------------------|------------------------------|-----------------------------|------------------------------|---|
| m1191                 | TTGCTGAACAAG<br>AGAGAACCT    | Mature 3'           | 1.042                        | 1                             | -1.246                       | 1                             | -1.298                      | 1                            | 3.566                        | 1                             | -6.093                       | 0.995                         | 21.726                      | 0.046                        | -2.477                        | 1                              | 1.381                       | 1                            | 12.117                      | 0.094                        |   |
| vvi-miR166d.c.e.f.g.h | GACCAGGCTTCA<br>TTCCCC       | Mature 3' sub       | 652.40<br>8                  | 0.858                         | 6.197                        | 1                             | 4042.9<br>35                | 0.027                        | -                            | 28.606                        | 1                            | 8.061                         | 1                           | 230.59<br>2                  | 0.210                         | -2.280                         | 1                           | 10.003                       | 1                           | -1.753                       | 1 |
| vvi-miR169r.t         | GGCAAGTTGACT<br>TGACTCAGT    | Mature 3'           | -2.793                       | 1                             | 10.907                       | 0.022                         | -3.905                      | 0.633                        | 9.305                        | 0.052                         | 7.366                        | 0.143                         | -1.263                      | 1                            | 15.752                        | 0.007                          | 1.650                       | 1                            | 5.100                       | 0.167                        |   |
| vvi-miR3633b          | GGAATGGGTGGC<br>TGGGATCTA    | Mature 5' super     | 2.502                        | 1                             | -4.793                       | 1                             | 11.993                      | 0.044                        | 2.239                        | 1                             | -1.279                       | 1                             | -2.865                      | 1                            | 1.859                         | 1                              | 1.664                       | 1                            | 6.965                       | 0.323                        |   |
| vvi-miR3636           | GTCTGTCGGAGA<br>AGCAAGTCGGAG | Mature 3' sub/super | -1.000                       | 1                             | 1.000                        | 1                             | 1.000                       | 1                            | -1.420                       | 1                             | 1.198                        | 1                             | 1.701                       | 1                            | 158.55<br>9                   | 0.078                          | 111.69<br>5                 | 0.263                        | 190.01<br>0                 | 0.033                        |   |
| vvi-miR3640           | AAAGGCATCATC<br>AATCAGGTAATG | Mature 3'           | 1.474                        | 1                             | -1.023                       | 1                             | -1.509                      | 1                            | 2.621                        | 1                             | -9.536                       | 0.361                         | 24.995                      | 0.046                        | -1.361                        | 1                              | 1.306                       | 1                            | 12.681                      | 0.139                        |   |
| vvi-miR3640           | TGCCACGTGTGC<br>AACTCAGGTCT  | Precursor           | -2.531                       | 1                             | -1.860                       | 1                             | 1.361                       | 1                            | 5.056                        | 1                             | 1                            | 1                             | -5.056                      | 1                            | 263.52<br>8                   | 0.012                          | -                           | 0.460                        | 141.66<br>9                 | 0.075                        |   |
| vvi-miR3640           | ACCTGATTGGTG<br>ATGCTTTTTTGG | Mature 5'           | 1.245                        | 1                             | 16.310                       | 0.670                         | 20.302                      | 0.166                        | 8.543                        | 0.294                         | 13.392                       | 0.111                         | 1.568                       | 1                            | -1.974                        | 1                              | 3.477                       | 1                            | 110.64<br>1                 | 0.001                        |   |
| vvi-miR395c.e.h.k     | GTTCCCTGACCA<br>CTTCACTG     | Mature 5'           | 1.210                        | 1                             | 4.047                        | 1                             | 3.345                       | 1                            | 1.717                        | 1                             | -1.063                       | 1                             | -1.825                      | 1                            | -5.348                        | 0.676                          | -3.768                      | 1                            | 23.007                      | 0.002                        |   |
| vvi-miR395f.i.j.l     | GTTCCCTGACCA<br>CTTCACTG     | Mature 5'           | 1.771                        | 1                             | 4.664                        | 1                             | 2.634                       | 1                            | 1.725                        | 1                             | -1.604                       | 1                             | -2.767                      | 1                            | -4.581                        | 1                              | -4.703                      | 1                            | 34.267                      | 0.032                        |   |

## Supplementary Material

|                    |                              |                    |        |   |        |       |        |          |        |       |        |        |        |        |        |        |        |       |        |       |        |       |   |
|--------------------|------------------------------|--------------------|--------|---|--------|-------|--------|----------|--------|-------|--------|--------|--------|--------|--------|--------|--------|-------|--------|-------|--------|-------|---|
| vvi-miR396a        | TTCCACAGCTTTC<br>TTGAACTA    | Mature 5'          | -2.723 | 1 | -1.095 | 1     | 2.487  | 1        | 1.343  | 1     | -4.834 | 0.547  | -6.493 | 0.340  | -2.524 | 1      | 1.449  | 1     | 11.146 | -     | 0.039  |       |   |
| vvi-miR399a        | GTGTGATTCTCCT<br>TTGGCAGA    | Mature 5'          | 7.169  | 1 | 35.482 | 1     | 4      | 0.044    | 213.50 | 5     | 0.081  | 170.74 | 9      | 0.145  | -1.250 | 1      | 35.482 | 1     | -1.191 | 1     | 170.74 | 0.094 |   |
| vvi-miR399a.h      | TGCCAAAGGAGA<br>ATTGCCCTG    | Mature 3'          | 6.398  | 1 | -1.717 | 1     | 10.987 | 0.458    | 766.23 | 3     | 0.005  | 141.75 | 6      | 0.148  | -5.405 | 1      | 116.99 | 2     | 0.364  | 1.024 | 1      | 2.081 | 1 |
| vvi-miR399b.c      | TGCCAAAGGAGA<br>GTTGCCCTG    | Mature 3'          | 3.068  | 1 | 16.128 | 0.265 | 49.488 | 0.014    | 119.21 | 7     | 0.009  | 9.384  | 1      | 12.704 | 0.404  | 141.70 | 5      | 0.012 | -3.647 | 1     | 1.068  | 1     |   |
| vvi-miR399i        | CGCCAAAGGAGA<br>GTTGCC       | Mature 3'<br>sub   | 1.184  | 1 | -1.826 | 1     | -2.162 | 1        | 77.202 | 0.005 | 35.833 | 0.111  | -2.155 | 1      | 47.629 | 0.035  | 1.369  | 1     | 1.373  | 1     | 1      | 1     |   |
| vvi-miR399i        | CGCCAAAGGAGA<br>GTTGCCCTG    | Mature 3'          | 1.823  | 1 | -1.209 | 1     | -2.204 | 1        | 47.194 | 0.005 | 18.231 | 0.111  | -2.589 | 1      | 19.659 | 0.088  | 1.317  | 1     | 1.122  | 1     | 1      | 1     |   |
| vvi-miR408         | CGGGGACGAGGT<br>AGTGCA       | Mature 5'<br>sub   | 2.431  | 1 | -1.811 | 1     | -4.402 | 1        | 1.510  | 1     | 7.223  | 0.481  | 4.783  | 0.931  | 2.170  | 1      | 1.349  | 1     | 28.390 | 0.033 | 1      | 1     |   |
| vvi-miRC477i.c.l.m | AAAGTTGGAAGC<br>CGGTGGGGGACC | Mature 3'<br>super | 1.157  | 1 | 38.975 | 0.260 | 45.088 | 0.044    | 2.386  | 1     | -1.014 | 1      | -2.420 | 1      | -3.947 | 1      | -1.914 | 1     | 9.735  | 1     | 1      | 1     |   |
| vvi-miRC477i.c.l.m | GTTGGAAGCCGG<br>TGGGGGAC     | Mature 3'<br>sub   | 3.028  | 1 | 10.308 | 0.829 | 31.215 | 0.044    | 12.577 | 0.352 | 3.891  | 1      | -3.232 | 1      | -4.535 | 1      | -1.092 | 1     | 8.846  | 0.377 | 1      | 1     |   |
| vvi-miRC477i.c.l.m | GTTGGAAGCCGG<br>TGGGGGACC    | Mature 3'          | 2.774  | 1 | 13.146 | 0.265 | 36.472 | 0.011    | 3.974  | 1     | 1.979  | 1      | -2.008 | 1      | -3.157 | 1      | -2.204 | 1     | 8.241  | 0.270 | 1      | 1     |   |
| vvi-miRC477i.c.l.m | TTGGAAGCCGGT<br>GGGGGACC     | Mature 3'<br>sub   | 5.817  | 1 | 13.890 | 0.260 | 80.795 | 1.94E-04 | 7.745  | 0.447 | 12.157 | 0.118  | 1.570  | 1      | -2.798 | 1      | -2.101 | 1     | 60.354 | 0.001 | 1      | 1     |   |

|                |                             |                        |        |       |        |       |             |              |        |       |        |       |        |       |        |       |        |   |             |       |
|----------------|-----------------------------|------------------------|--------|-------|--------|-------|-------------|--------------|--------|-------|--------|-------|--------|-------|--------|-------|--------|---|-------------|-------|
| vvi-miRC477j   | CTGGAAGCCGAT<br>GGGGGACC    | Mature 3'<br>sub       | 1.895  | 1     | 10.209 | 0.265 | 19.344      | 0.027        | 5.479  | 0.847 | 5.330  | 0.675 | -1.028 | 1     | -5.822 | 0.820 | -2.013 | 1 | 9.346       | 0.139 |
| vvi-miRC477o   | TTGGAAGTCGGT<br>GGGGGACC    | Mature 3'<br>sub       | 10.685 | 0.858 | 11.784 | 1     | 125.91<br>7 | 3.77E-<br>04 | 13.118 | 0.372 | 2.902  | 1     | -4.520 | 1     | -3.133 | 1     | -2.552 | 1 | 10.915      | 1     |
| vvi-miRC482a   | GAATGGGCTGAT<br>TGGGATA     | Mature 5'<br>sub       | 6.697  | 1     | -2.739 | 1     | 18.346      | 0.027        | 3.550  | 1     | 22.608 | 1     | 80.265 | 0.518 | -1.926 | 1     | -3.633 | 1 | 15.894      | 1     |
| vvi-miRC482a   | AATGGGCTGATT<br>GGGATAAAA   | Mature 5'<br>sub/super | 1.945  | 1     | 1.683  | 1     | -1.156      | 1            | 2.124  | 1     | -2.302 | 1     | -4.891 | 0.475 | -2.941 | 1     | -2.692 | 1 | 11.392      | 0.033 |
| vvi-miRC482b   | ATGGGCGGTTTG<br>GTAAGAGGGAA | Mature 5'<br>sub/super | 3.115  | 1     | 1.570  | 1     | -1.984      | 1            | 1.014  | 1     | 82.557 | 0.523 | 83.727 | 0.475 | -1.482 | 1     | -4.551 | 1 | 192.08<br>9 | 0.039 |
| vvi-miRC530a.b | TCTGCATTTGCAC<br>CTGCACCT   | Mature 5'              | -1.073 | 1     | -4.155 | 1     | -3.873      | 1            | 37.392 | 0.005 | 17.855 | 0.111 | -2.094 | 1     | 16.850 | 0.078 | 2.381  | 1 | 4.403       | 0.793 |

## Harvest

| Small RNA -<br>Name           | Sequence read             | Match<br>type    | Mon_C<br>S_hv vs<br>Bol_CS<br>_hv -<br>FC | Mon_C<br>S_hv vs<br>Bol_CS<br>_hv -<br>FDR | Mon_C<br>Ric_CS<br>_hv -<br>FC | Mon_C<br>Ric_CS<br>_hv -<br>FDR | Bol_CS<br>_hv vs<br>Ric_CS<br>_hv -<br>FC | Bol_CS<br>_hv vs<br>Ric_CS<br>_hv -<br>FDR | Mon_S<br>G_hv<br>vs<br>Bol_SG<br>_hv -<br>FC | Mon_S<br>G_hv<br>vs<br>Bol_SG<br>_hv -<br>FDR | Mon_S<br>G_hv<br>vs<br>Ric_SG<br>_hv -<br>FC | Mon_S<br>G_hv<br>vs<br>Ric_SG<br>_hv -<br>FDR | Bol_SG<br>_hv vs<br>Ric_SG<br>_hv -<br>FC | Bol_SG<br>_hv vs<br>Ric_SG<br>_hv -<br>FDR | Mon_C<br>S_hv vs<br>Mon_S<br>G_hv -<br>FC | Mon_C<br>S_hv vs<br>Mon_S<br>G_hv -<br>FDR | Bol_CS<br>_hv vs<br>Bol_SG<br>_hv -<br>FC | Bol_CS<br>_hv vs<br>Bol_SG<br>_hv -<br>FDR | Ric_CS<br>_hv vs<br>Ric_SG<br>_hv -<br>FC | Ric_CS<br>_hv vs<br>Ric_SG<br>_hv -<br>FDR |
|-------------------------------|---------------------------|------------------|-------------------------------------------|--------------------------------------------|--------------------------------|---------------------------------|-------------------------------------------|--------------------------------------------|----------------------------------------------|-----------------------------------------------|----------------------------------------------|-----------------------------------------------|-------------------------------------------|--------------------------------------------|-------------------------------------------|--------------------------------------------|-------------------------------------------|--------------------------------------------|-------------------------------------------|--------------------------------------------|
| m1188                         | CCCAGAGGACT<br>TAGTGGATC  | Mature 3'        | -1.087                                    | 1                                          | -1.970                         | 1                               | -1.812                                    | 1                                          | 2.050                                        | 1                                             | 1.990                                        | 1                                             | -1.030                                    | 1                                          | 26.436                                    | 0.006                                      | 11.863                                    | 0.047                                      | -6.743                                    | 0.332                                      |
| m1355                         | GCCGCGTTGGAG<br>CAGGAGCTT | Mature 5'        | -1.676                                    | 1                                          | -1.324                         | 1                               | 1.266                                     | 1                                          | 96.267                                       | 0.143                                         | 49.660                                       | 1                                             | -1.939                                    | 1                                          | 181.57<br>8                               | 0.048                                      | -1.125                                    | 1                                          | -2.761                                    | 1                                          |
| vvi-miR156e                   | TGACAGAGGAGA<br>GTGAGCAC  | Mature 5'        | 14.931                                    | 1                                          | 20.917                         | 1                               | 1.401                                     | 1                                          | 19.448                                       | 0.075                                         | 39.969                                       | 0.016                                         | 2.055                                     | 1                                          | 8.689                                     | 1                                          | 11.318                                    | 0.178                                      | 16.604                                    | 0.033                                      |
| vvi-<br>miR166d.c.e.f.g.<br>h | CGGACCAGGCTT<br>CATTCCCC  | Mature 3'<br>sub | -5.661                                    | 0.832                                      | 3.211                          | 1                               | 18.180                                    | 0.040                                      | 18.239                                       | 0.016                                         | 1.227                                        | 1                                             | 22.373                                    | 0.031                                      | 2.572                                     | 1                                          | -1.253                                    | 1                                          | -1.018                                    | 1                                          |

Supplementary Material

|                               |                              |                        |        |       |        |             |        |       |             |              |              |       |             |              |             |             |             |              |             |        |        |   |       |   |
|-------------------------------|------------------------------|------------------------|--------|-------|--------|-------------|--------|-------|-------------|--------------|--------------|-------|-------------|--------------|-------------|-------------|-------------|--------------|-------------|--------|--------|---|-------|---|
| vvi-miR166d.c.e.f.g.h         | GACCAGGCTTCA<br>TTCCCC       | Mature 3'<br>sub       | 3.915  | 1     | -      | 172.64<br>7 | 0.696  | -     | 675.87<br>6 | 0.021        | 1457.7<br>19 | 0.009 | 9.170       | 1            | -           | 158.95<br>8 | 0.196       | -            | 454.17<br>9 | 0.100  | -1.220 | 1 | 3.486 | 1 |
| vvi-miR3634                   | TCCGACTCGCAC<br>TCATGCCGT    | Mature 3'<br>sub       | 1.559  | 1     | 2.467  | 1           | 1.583  | 1     | -6.318      | 0.017        | -2.020       | 1     | 3.127       | 1            | 3.600       | 0.311       | -2.735      | 0.937        | -1.384      | 1      |        |   |       | 1 |
| vvi-miR3636                   | GTCTGTCGGAGA<br>AGCAAGTCGGAG | Mature 3'<br>sub/super | 1.000  | 1     | 1.000  | 1           | 1.000  | 1     | 1.780       | 1            | 1.219        | 1     | -1.460      | 1            | 164.64<br>1 | 0.046       | 292.99<br>2 | 3.67E-<br>04 | 200.67<br>5 | 0.011  |        |   |       |   |
| vvi-miR3640                   | ACCTGATTGGTG<br>ATGCTTTTTTGG | Mature 5'              | -5.351 | 1     | -1.870 | 1           | 2.861  | 1     | 6.335       | 0.928        | 8.954        | 0.575 | 1.413       | 1            | -1.415      | 1           | 23.958      | 0.048        | 11.837      | 0.037  |        |   |       |   |
| vvi-miR3640                   | ACCCGAAGCTGT<br>ACACGTGACACC | Precursor              | 1.209  | 1     | -2.169 | 1           | -2.623 | 1     | 1.455       | 1            | 1.597        | 1     | 1.098       | 1            | 5.125       | 0.876       | 6.167       | 0.380        | 17.760      | 0.033  |        |   |       |   |
| vvi-miR393a.b                 | TCCAAAGGGATC<br>GCATTGATCC   | Mature 5'<br>super     | 3.435  | 1     | 1.636  | 1           | -2.100 | 1     | 158.70<br>0 | 0.053        | -8.257       | 0.673 | 19.220      | 1            | 1.311       | 1           | 415.63<br>3 | 3.67E-<br>04 | -           | 10.300 | 0.309  |   |       |   |
| vvi-miR395c.e.h.k             | GTTCCCTGACCA<br>CTTCACTG     | Mature 5'              | 6.416  | 0.215 | 1.487  | 1           | -4.315 | 0.933 | -1.137      | 1            | -4.222       | 1     | -3.713      | 1            | -2.154      | 1           | 15.711      | 0.002        | 13.520      | 0.023  |        |   |       |   |
| vvi-miR395f.i.j.l             | GTTCCCTGACCA<br>CTTCACTG     | Mature 5'              | 11.986 | 0.016 | 3.458  | 1           | -3.466 | 1     | 1.945       | 1            | -2.668       | 1     | -5.190      | 1            | -2.764      | 1           | 17.034      | 0.002        | 25.504      | 0.011  |        |   |       |   |
| vvi-miR395f.i.j.l.c.e.h.k.a.d | CTGAAGTGTTTG<br>GGGGAAC      | Mature 3'<br>sub       | 2.363  | 1     | 2.134  | 1           | -1.107 | 1     | 9.740       | 0.034        | -4.305       | 1     | 41.932      | 0.054        | -1.378      | 1           | 2.991       | 1            | 12.666      | 1      |        |   |       | 1 |
| vvi-miR395f.i.j.l.c.e.h.k.a.d | CTGAAGTGTTTG<br>GGGGAAC      | Mature 3'              | 2.181  | 1     | 2.777  | 1           | 1.273  | 1     | 12.922      | 0.003        | -2.307       | 1     | 29.809      | 3.10E-<br>04 | -1.282      | 1           | 4.621       | 0.307        | -8.211      | 0.100  |        |   |       |   |
| vvi-miR395f.i.j.l.c.e.h.k.a.d | TGAAGTGTTTGG<br>GGGGAAC      | Mature 3'<br>sub       | 4.533  | 1     | 29.538 | 1           | 6.516  | 1     | 106.88<br>2 | 9.57E-<br>05 | -4.930       | 1     | 526.87<br>5 | 3.10E-<br>04 | 4.930       | 1           | 116.22<br>9 | 1.97E-<br>05 | -           | 29.538 | 1      |   |       |   |

|                      |                           |                  |        |       |        |   |        |       |             |              |        |              |             |       |              |              |        |              |             |       |
|----------------------|---------------------------|------------------|--------|-------|--------|---|--------|-------|-------------|--------------|--------|--------------|-------------|-------|--------------|--------------|--------|--------------|-------------|-------|
| vvi-miR399a.h        | TGCCAAAGGAGA<br>ATTGCCCTG | Mature 3'        | -2.380 | 1     | 2.600  | 1 | 6.189  | 1     | 544.84<br>9 | 0.028        | -1.000 | 1            | 544.84<br>9 | 0.031 | 283.80<br>6  | 0.066        | 4.569  | 1            | 737.98<br>5 | 0.011 |
| vvi-miR399b.c        | TGCCAAAGGAGA<br>GTTGCCCTG | Mature 3'        | 11.705 | 0.134 | -1.372 | 1 | 8.529  | 0.360 | 523.18<br>2 | 0.003        | 48.819 | 1            | 10.717      | 0.375 | 2256.7<br>25 | 7.22E-<br>06 | 2.714  | 1            | 33.681      | 0.011 |
| vvi-miR399i          | CGCCAAAGGAGA<br>GTTGCC    | Mature 3'<br>sub | -1.420 | 1     | -2.447 | 1 | -1.724 | 1     | 90.902      | 0.001        | 9.909  | 1            | -9.174      | 0.355 | 150.61<br>6  | 7.50E-<br>05 | -1.167 | 1            | -6.212      | 0.653 |
| vvi-miR399i          | CGCCAAAGGAGA<br>GTTGCCCT  | Mature 3'<br>sub | -1.705 | 1     | -1.774 | 1 | -1.041 | 1     | 850.55<br>2 | 0.001        | 84.738 | 0.578        | 10.037      | 0.539 | 792.07<br>0  | 0.001        | 1.830  | 1            | -5.268      | 1     |
| vvi-miR399i          | CGCCAAAGGAGA<br>GTTGCCCTG | Mature 3'        | -1.713 | 1     | -1.868 | 1 | -1.090 | 1     | 100.76<br>3 | 1.93E-<br>07 | 11.745 | 0.032        | -8.579      | 0.192 | 108.04<br>7  | 3.17E-<br>07 | 1.597  | 1            | -4.925      | 0.563 |
| vvi-miR399i.b.c      | GCCAAAGGAGAG<br>TTGCCCTG  | Mature 3'<br>sub | -5.581 | 1     | 1.806  | 1 | 10.076 | 0.273 | 21.734      | 0.365        | 1.352  | 1            | 16.076      | 0.539 | 21.247       | 0.311        | 5.709  | 0.885        | 28.376      | 0.037 |
| vvi-miR477b          | GAAGCTCTTGAG<br>GGGGACT   | Precursor        | -2.288 | 1     | -2.551 | 1 | -1.115 | 1     | 35.091      | 0.001        | 13.676 | 0.163        | -2.566      | 1     | -4.304       | 1            | 18.650 | 0.008        | 8.107       | 0.332 |
| vvi-miR477b          | CGAAGTCTTTGG<br>GGAGAGTGG | Mature 3'        | -7.649 | 0.215 | -1.639 | 1 | 4.667  | 1     | 1.616       | 1            | 5.465  | 0.666        | 3.382       | 1     | 11.617       | 0.046        | 1.064  | 1            | -1.297      | 1     |
| vvi-miRC477i.c.l.m.p | GTTGGAAGCCGG<br>TGGGGGAC  | Mature 3'<br>sub | -7.515 | 0.011 | 1.234  | 1 | 9.272  | 0.001 | 29.015      | 7.94E-<br>09 | 23.614 | 1.17E-<br>07 | -1.229      | 1     | -8.968       | 0.002        | 24.312 | 1.69E-<br>08 | 2.134       | 1     |
| vvi-miRC477i.c.l.m.p | TTGGAAGCCGGT<br>GGGGGACC  | Mature 3'<br>sub | 13.117 | 0.041 | -3.145 | 1 | 4.171  | 1     | 5.494       | 0.428        | 4.751  | 0.858        | -1.156      | 1     | -4.388       | 0.748        | 16.422 | 0.005        | 3.405       | 1     |
| vvi-miRC477i.c.l.m.p | GTTGGAAGCCGG<br>TGGGGGACC | Mature 3'        | 10.085 | 0.098 | -1.916 | 1 | 5.264  | 0.877 | 14.805      | 0.008        | 12.220 | 0.032        | -1.212      | 1     | 12.422       | 0.026        | 12.020 | 0.018        | 1.885       | 1     |
| vvi-miRC477i.c.l.m.  | TCCCTCAAAGGCT<br>TCCAATTT | Mature 5'        | 13.023 | 0.113 | -1.002 | 1 | 13.001 | 0.069 | 5.745       | 0.211        | 3.025  | 1            | -1.899      | 1     | -4.450       | 0.459        | 16.813 | 0.018        | -1.468      | 1     |

Supplementary Material

| p.n.o.k      |                            |                    |             |       |        |   |             |              |             |              |             |              |        |       |             |              |              |              |        |       |
|--------------|----------------------------|--------------------|-------------|-------|--------|---|-------------|--------------|-------------|--------------|-------------|--------------|--------|-------|-------------|--------------|--------------|--------------|--------|-------|
| vvi-miRC477j | CTGGAAGCCGAT<br>GGGGGACC   | Mature 3'<br>sub   | -<br>14.248 | 0.009 | -2.320 | 1 | 6.140       | 0.210        | 3.433       | 0.873        | 3.677       | 0.976        | 1.071  | 1     | -7.961      | 0.046        | 6.145        | 0.102        | 1.072  | 1     |
| vvi-miRC477j | GCTGGAAGCCGA<br>TGGGGGACC  | Mature 3'          | -5.096      | 0.431 | -2.175 | 1 | 2.343       | 1            | 8.728       | 0.028        | 9.910       | 0.032        | 1.136  | 1     | -6.402      | 0.131        | 6.948        | 0.079        | 3.367  | 1     |
| vvi-miRC477j | GCTGGAAGCCGA<br>TGGGGGAC   | Mature 3'<br>sub   | -<br>29.881 | 1     | 1.786  | 1 | 53.355      | 0.887        | 28.516      | 0.470        | 11.355      | 1            | -2.511 | 1     | -4.989      | 1            | 170.80<br>6  | 0.013        | 1.275  | 1     |
| vvi-miRC477n | GTTGGAAGTCGG<br>TGGGGGAAC  | Mature 3'          | -<br>13.676 | 0.012 | 2.439  | 1 | 33.350      | 1.85E-<br>05 | 735.74<br>0 | 1.81E-<br>16 | 172.56<br>9 | 2.15E-<br>10 | -4.263 | 0.355 | 17.615      | 0.005        | 571.21<br>3  | 5.28E-<br>17 | 4.017  | 0.332 |
| vvi-miRC477n | AGTTGGAAGTCG<br>GTGGGGGAAC | Mature 3'<br>super | -<br>31.297 | 1     | 4.521  | 1 | 141.49<br>9 | 0.021        | 269.46<br>7 | 1.25E-<br>10 | 99.396      | 3.13E-<br>07 | -2.711 | 1     | -3.557      | 1            | 2370.8<br>84 | 4.11E-<br>13 | 6.180  | 0.037 |
| vvi-miRC477o | GTTGGAAGTCGG<br>TGGGGGAC   | Mature 3'<br>sub   | -<br>60.460 | 0.689 | 1.307  | 1 | 79.001      | 0.251        | 212.95<br>3 | 0.008        | 40.271      | 1            | -5.288 | 0.797 | 60.460      | 0.472        | 212.95<br>3  | 0.002        | -1.962 | 1     |
| vvi-miRC477o | GTTGGAAGTCGG<br>TGGGGGACC  | Mature 3'          | -7.608      | 0.113 | -1.107 | 1 | 6.871       | 0.197        | 255.39<br>2 | 2.00E-<br>09 | 154.62<br>5 | 1.01E-<br>07 | -1.652 | 1     | 138.35<br>1 | 3.17E-<br>07 | 14.044       | 0.003        | 1.237  | 1     |
| vvi-miRC482a | GAATGGGCTGAT<br>TGGGATA    | Mature 5'<br>sub   | -<br>21.691 | 1     | 7.084  | 1 | 153.65<br>8 | 0.040        | -1.144      | 1            | 2.177       | 1            | 2.491  | 1     | 1.046       | 1            | 19.829       | 1            | -3.111 | 1     |

<sup>a</sup>: Match type indicates the similarity between sequencing reads and annotated 3p or 5p miRNA. Super : when the reads is longer, sub: when reads are shorter. Precursor when the reads is shifted more than 5 nt respect to the mature sequence (3p or 5p).

FC: Fold change. In the comparison Library A vs Library B, it is positive when Lib B > LibA (FC = Lib B/ Lib A), it is negative when Lib B < Lib A (FC= - LibA/ Lib B)

FDR: corrected p-value, FDR
